# Supplementary material for: Integrated Network Analysis to Identify Key Modules and Potential Hub Genes Involved in Bovine Respiratory Disease: A Systems Biology Approach
Source: Front Genet. 2021 Oct 18;12:753839. doi: 10.3389/fgene.2021.753839 (PMC8559434; doi:10.3389/fgene.2021.753839)
Supplement: Supplementary file 7 [file Table4.xlsx]

## Sheet: turquoise
Supplementary Table 4: Functional enrichment analysis results for significant highly-correlated modules with clinical traits of BRD (significant terms are highlighted)
BP	Term	Overlap	P-value	Adjusted P-value	Old P-value	Old Adjusted P-value	Odds Ratio	Combined Score	Genes	Kegg	Term	Overlap	P-value	Adjusted P-value	Old P-value	Old Adjusted P-value	Odds Ratio	Combined Score	Genes
	neutrophil mediated immunity (GO:0002446)	194/487	1.72447e-58	7.44624e-55	0	0	5.35552	712.311	CDA;GMFG;LGALS3;PSMD6;PNP;FTH1;PGLYRP1;GOLGA7;SLC11A1;PRKCD;MCEMP1;ARMC8;UNC13D;BIN2;CRISPLD2;CFD;TMEM63A;STXBP3;STXBP2;MGST1;CFP;NEU1;S100A12;CD14;ATG7;S100A11;HMOX2;ARSB;ATP6V0A1;GSDMD;ACE;STK11IP;NBEAL2;PPBP;LYZ;DERA;BST1;VNN1;TCN1;CYSTM1;ARHGAP9;GPI;ORM1;CTSZ;AP2A2;CTSS;MMP25;GLIPR1;TIMP2;CTSH;CD36;RAC1;CTSD;CTSC;CTSB;CD53;CAP1;SERPINB1;FCER1G;DBNL;ANXA2;ANXA3;NFAM1;PGAM1;GAA;RHOG;AMPD3;RHOA;…	.	Lysosome	50/128	1.66008e-15	5.16284e-13	0	0	4.91919	167.41	SCARB2;CTSZ;CLTB;CLTA;TCIRG1;LITAF;CTSS;SGSH;LAPTM4B;LAMP1;NAGLU;HYAL1;CTSK;SMPD1;LAMP2;AP1S2;CTSH;CTSF;CTSD;CTSC;CTSB;ATP6V0B;ATP6AP1;SLC11A1;GAA;PLA2G15;NPC1;NPC2;ATP6V0D1;CD63;GBA;GGA1;NEU1;PSAP;ARSG;AP1M2;ARSB;ATP6V0A1;CD164;SORT1;CTNS;NAGA;MCOLN1;IGF2R;GALNS;PPT1;MAN2B1;PPT2;CD68;LGMN
	neutrophil degranulation (GO:0043312)	191/479	1.16272e-57	2.51031e-54	0	0	5.3583	702.455	FCN1;CDA;GHDC;GMFG;RAB3D;HFE;PYCARD;RAB44;LGALS3;PSMD6;PNP;LAMP1;PLAU;FTH1;LAMP2;CLEC5A;TOM1;COTL1;SIRPA;CAPN1;OSTF1;PGLYRP1;ACAA1;GYG1;GOLGA7;CD300A;SLC11A1;PRKCD;MCEMP1;CYBA;ARMC8;OLFM4;UNC13D;ARHGAP45;RAB31;TYROBP;DOK3;BIN2;CRISPLD2;S100A9;S100A8;FTL;CFD;RAB5C;TMEM63A;STXBP3;BRI3;STXBP2;C5AR1;MGST1;GPR84;PSEN1;CFP;CNN2;ADGRG3;SDCBP;DPP7;ALDH3B1;PSAP;NEU1;S100A12;CD14;ATG7;ATP6V1D;S100A11;HMOX2…	.	Shigellosis	73/246	2.0005e-14	3.11077e-12	0	0	3.2533	102.618	ARF1;GSK3A;CXCL8;ARPC1B;UBE2D3;UBE2D1;PIK3CD;ACTB;CRKL;HK1;IKBKB;PYCARD;HK3;CAPNS1;CASP4;CAPN2;CASP1;RAC1;CAPN1;BTRC;H3-3B;ACTR3;GABARAPL2;GABARAPL1;IL1R1;ACTN1;PRKCD;IL18;WIPI1;ACTN4;RHOA;TNFRSF1A;IL1B;HCLS1;ELMO2;VDAC1;RBCK1;TLN1;PLCB1;MYL9;TLR4;DOCK1;NAIP;CD44;BECN1;SRC;PXN;NOD1;FOXO4;NLRC4;GABARAP;MYL12A;MYL12B;CYTH4;H3C12;UBC;MAPK1;RIPK1;CD14;WASF2;JUN;BNIP3;ARPC4;ARPC5;MAPK14;MAPK13;NFKBIA;…
	neutrophil activation involved in immune response (GO:0002283)	191/483	5.52123e-57	7.94689e-54	0	0	5.28368	684.442	FCN1;CDA;GHDC;GMFG;RAB3D;HFE;PYCARD;RAB44;LGALS3;PSMD6;PNP;LAMP1;PLAU;FTH1;LAMP2;CLEC5A;TOM1;COTL1;SIRPA;CAPN1;OSTF1;PGLYRP1;ACAA1;GYG1;GOLGA7;CD300A;SLC11A1;PRKCD;MCEMP1;CYBA;ARMC8;OLFM4;UNC13D;ARHGAP45;RAB31;TYROBP;DOK3;BIN2;CRISPLD2;S100A9;S100A8;FTL;CFD;RAB5C;TMEM63A;STXBP3;BRI3;STXBP2;C5AR1;MGST1;GPR84;PSEN1;CFP;CNN2;ADGRG3;SDCBP;DPP7;ALDH3B1;PSAP;NEU1;S100A12;CD14;ATG7;ATP6V1D;S100A11;HMOX2…	.	Salmonella infection	73/249	3.97874e-14	4.12463e-12	0	0	3.1973	98.6533	ARF1;CXCL8;ARPC1B;FHOD1;BRK1;PIK3CD;ACTB;IKBKB;PYCARD;CASP7;CASP3;TUBB1;CASP4;CASP1;RAC1;VPS39;ACTR3;MAP2K4;HSP90AA1;MAP2K2;ANXA2;IL18;RHOG;IRAK4;RHOA;TIRAP;DNM2;TNFRSF1A;IL1B;ELMO2;RAB7B;RAF1;MYL9;TLR4;GAPDH;NAIP;RAB7A;TLR2;DCTN5;RAB5C;DCTN2;DCTN4;LY96;NOD1;SNX33;NLRC4;MYL12A;MYL12B;KLC4;PAK1;CYTH4;IRAK1;MYO6;MAPK1;RIPK1;CD14;FADD;RILP;GSDMD;TCF7L2;JUN;ARPC4;ARPC5;MAPK14;MAPK13;NFKBIA;SNX18;ARPC…
	cellular response to cytokine stimulus (GO:0071345)	114/456	1.32423e-15	1.4295e-12	0	0	2.59198	88.7958	IL1RN;F13A1;IL1RAP;CRKL;PYCARD;ZFP36;PIM1;IL12B;LGALS9;JUNB;IL6R;IL13RA1;IFNAR2;IL4R;CISH;IL1R1;IL1R2;ACOD1;EREG;IL23A;CSF1R;MAOA;CSF2RB;IL22RA2;SOCS3;SBNO2;IRAK1;IRAK2;OCSTAMP;INPP5D;UBC;HMOX1;RIPK1;SOCS6;MCL1;STAT5A;CCR1;STAT5B;FN1;BCL6;IL7;LCN2;GRB2;SLC26A6;BCL2L1;NFE2L2;CDKN1A;GSK3A;CXCL8;FLT3;ITGB2;PIK3CD;IL18BP;IKBKB;HYAL1;CASP3;ITGAX;CASP1;LBP;CD36;JAK2;JAK3;ADAMTS7;IL10;HSP90AA1;ANXA1;IFN…	.	Tuberculosis	57/180	7.31451e-13	4.61385e-11	0	0	3.55799	99.4234	ITGB2;CALML4;LSP1;TCIRG1;CTSS;LAMP1;CASP3;LAMP2;ITGAX;IL12B;LBP;JAK2;CTSD;IL10;ATP6V0B;FCER1G;ATP6AP1;IFNGR1;SPHK2;IFNGR2;SPHK1;IL18;IRAK4;RHOA;TIRAP;TNFRSF1A;IL23A;IL1B;ATP6V0D1;CLEC4E;RAF1;TLR4;RAB7A;TLR2;CEBPB;RAB5C;SRC;NOD2;CORO1A;IRAK1;CLEC7A;IRAK2;MAPK1;CD14;FADD;FCGR1A;ATP6V0A1;VDR;IL10RB;IL10RA;CARD9;MAPK14;MAPK13;FCGR2A;FCGR2B;CALM2;MYD88
	cytokine-mediated signaling pathway (GO:0019221)	141/633	1.57922e-14	1.36381e-11	0	0	2.23628	71.0673	IFITM3;IFITM1;IL1RN;HFE;PITPNA;F13A1;IL1RAP;CRKL;TXNDC17;PYCARD;PSMD6;IL18RAP;CFL1;PIM1;IL12B;BTRC;JUNB;IL6R;IL13RA1;IFNAR2;IL15RA;IL4R;CISH;IL1R1;IL1R2;PRKCD;TALDO1;EREG;IL23A;CARD14;CSF1R;MAOA;CSF2RB;ADIPOR1;IL22RA2;CNN2;SOCS3;IRAK1;IRAK2;INPP5D;UBC;HMOX1;RIPK1;SOCS6;MCL1;STAT5A;CCR1;STAT5B;TNFSF14;TNFSF12;TNFSF13;FN1;PPBP;NFKBIA;BCL6;IL7;LCN2;TNFSF9;GRB2;MYD88;BCL2L1;ARF1;CDKN1A;CXCL8;FLT3;ITG…	.	Yersinia infection	48/137	7.41776e-13	4.61385e-11	0	0	4.13256	115.421	CXCL8;SRC;ARPC1B;PXN;WAS;PIK3CD;NLRC4;MEFV;ACTB;CRKL;PYCARD;IKBKB;IRAK1;RPS6KA1;CASP1;MAPK1;PTK2B;PIP5K1B;PIP5K1C;RAC1;WASF2;ACTR3;IL10;MAP2K4;GIT2;JUN;MAP2K2;FN1;IL18;RHOG;ARPC4;ARPC5;IRAK4;BAIAP2;MAPK14;RHOA;VAV1;MAPK13;NFKBIA;FCGR2A;ARPC3;IL1B;ELMO2;LCP2;DOCK1;TLR4;MYD88;SKAP2
	regulation of inflammatory response (GO:0050727)	53/166	3.24131e-12	2.33266e-09	0	0	3.59683	95.1542	TNFAIP6;SERPINE1;METRNL;CASP4;CASP1;IL12B;FFAR2;TNFAIP8L2;GGT1;JAK2;IL10;ANXA1;PRKCD;IL18;ACOD1;TNFRSF1A;ACE2;HCK;PSMA6;IL23A;PPARG;SMPDL3B;S100A9;TLR4;S100A8;TLR2;PPARD;PTGER4;SEMA7A;NLRX1;GBA;LPL;MGST2;NOD1;NOD2;MEFV;SBNO2;MAPK7;S100A12;NLRP1;CCL16;NR1H3;MAPK14;KLF4;SELE;MAPK13;NFKBIA;BST1;NLRP12;BCL6;TNIP1;MYD88;PTPN2	.	Fc gamma R-mediated phagocytosis	37/97	1.74926e-11	9.06699e-10	0	0	4.71038	116.673	NCF1;ARPC1B;WAS;PIK3CD;CRKL;PAK1;INPP5D;CFL1;MAPK1;PIP5K1B;PIP5K1C;RAC1;FCGR1A;WASF2;LYN;VASP;ACTR3;PLA2G4F;MARCKSL1;GSN;SPHK2;SPHK1;LIMK2;PRKCD;PLA2G4A;ARPC4;ARPC5;GAB2;VAV1;DNM2;HCK;MARCKS;FCGR2A;ARPC3;RAF1;FCGR2B;DOCK1
	inflammatory response (GO:0006954)	69/252	6.84352e-12	4.22148e-09	0	0	2.90023	74.5582	ORM1;CXCL8;TNFAIP6;ITGB2;PIK3CD;F11R;LTB4R;CXCL5;IKBKB;MMP25;IL18RAP;ADGRE5;HYAL1;CCRL2;PROK2;LGALS9;RAC1;JAK3;IL10;ANXA1;SLC11A1;NFAM1;IL18;CYBA;TNFRSF1B;TNFRSF1A;ADORA2A;IL1B;MAPKAPK2;CHI3L1;TLR4;S100A9;S100A8;CCL14;PTGER4;HDAC4;CSF1R;HDAC5;CEBPB;NLRX1;KLK1;C5AR2;C5AR1;NOD1;AOAH;NOD2;NLRC4;MEFV;THBS1;PRDX5;CXCR2;RELT;CCL16;LYN;AOC3;IL10RB;STAT3;PPBP;LYZ;SELE;NLRP12;VNN1;DLC1;IL2RA;FAS;LTBR;CDO1…	.	Epithelial cell signaling in Helicobacter pylori infection	28/70	1.38487e-09	6.1528e-08	0	0	5.07768	103.573	CXCL8;SRC;NOD1;TCIRG1;F11R;IKBKB;PAK1;CXCR1;CASP3;CXCR2;RAC1;ATP6V1E1;ATP6V1D;ATP6V1C1;ATP6V0A1;ATP6V1F;JAM3;LYN;MAP2K4;ATP6V0B;JUN;ATP6V0E1;ATP6AP1;MAPK14;MAPK13;NFKBIA;ATP6V1B2;ATP6V0D1
	protein transport (GO:0015031)	80/326	6.38993e-11	3.44896e-08	0	0	2.50454	58.7908	STEAP3;SYS1;ZFYVE9;KDELR1;HFE;RAB3D;AP2A1;VLDLR;TCIRG1;CLU;RAB43;RAB44;LAMP2;TMED3;TOM1;CD36;ATP6V1E1;GOLGA7;TBC1D22A;WLS;TBC1D10B;ARRDC4;ATP6V0B;ATP6V0E1;ATP6AP1;ARRDC1;TBC1D8;LMTK2;TBC1D9;DNM2;RAB32;TBC1D2;RAB31;RABL3;ATP6V1B2;MYH9;KDELR2;PPARG;ATP6V0D1;RAB7B;OPTN;RAB7A;RAB1A;RAMP2;TBC1D9B;RAMP3;RAB5C;STX17;LRP1;RAB1B;VPS26A;SNX33;STX11;RAB21;GGA1;RAB20;RAB25;MYO6;RAB24;STX6;STX5;TBC1D14;STX4;S…	.	Pertussis	29/76	2.607e-09	1.01347e-07	0	0	4.70025	92.9008	CXCL8;ITGB2;LY96;NOD1;CALML4;CXCL5;GNAI2;PYCARD;CASP7;IRAK1;CASP3;CFL1;CASP1;IL12B;MAPK1;CD14;IL10;JUN;IRAK4;MAPK14;RHOA;TIRAP;MAPK13;IL23A;IL1B;IRF1;TLR4;CALM2;MYD88
	transmembrane receptor protein tyrosine kinase signaling pathway (GO:0007169)	90/396	3.24888e-10	1.55874e-07	0	0	2.26736	49.5362	GSK3A;NCF1;NCF2;FLT3;ARPC1B;FLT4;ITGB3;ITSN1;NCF4;BRK1;AP2A1;TCIRG1;AP2A2;FGFRL1;ACTB;PTPRG;SPRED1;CASP3;PDK4;RAC1;ANKS1A;JAK2;ATP6V1E1;JAK3;ACTR3;HSP90AA1;ATP6V0B;ATP6V0E1;ATP6AP1;NRG1;CYBA;TYK2;MMP9;RHOA;VAV1;FGR;HCK;MAPKAPK3;DDIT4;MAPKAPK2;ATP6V1B2;ELMO2;LCP2;PLCB1;ATP6V0D1;DOCK1;RHOQ;CSF1R;RGS14;SRC;MVP;PXN;FOXO4;PSEN1;MYL12A;RASGRP4;APH1A;EFNB1;SDCBP;PAK1;UBC;AP2S1;PTK2B;MAPK1;WASF2;POLR2J;A…	.	Pathogenic Escherichia coli infection	53/197	3.59433e-09	1.15192e-07	0	0	2.81752	54.7837	ARF1;CXCL8;ARPC1B;BRK1;ACTB;IKBKB;PYCARD;CASP7;CASP3;TUBB1;CASP4;CASP1;RAC1;ACTR3;ARHGEF11;IL1R1;IL18;IRAK4;F2;RHOA;TIRAP;TNFRSF1A;IL1B;HCLS1;MYH9;TMBIM6;TLR4;GAPDH;NAIP;RAB1A;SRC;PAK1;CYTH4;IRAK1;MYO6;MAPK1;RIPK1;FADD;WASF2;JUN;ARPC4;ARPC5;BAIAP2;MAPK14;MAPK13;NFKBIA;FCGR2A;ARPC3;MYO5B;FAS;PTPN6;MYD88;MYO1F
	regulation of tumor necrosis factor production (GO:0032680)	26/61	1.03645e-09	4.47539e-07	0	0	5.65534	116.995	ORM1;C5AR2;LY96;NOD2;CLU;LILRA4;PYCARD;ZFP36;IL12B;RIPK1;LBP;LGALS9;FADD;CD14;JAK2;IL10;ARG2;CYBA;TIRAP;IL23A;MAPKAPK2;RARA;BPI;TLR4;TLR2;LTF	.	Platelet activation	39/124	3.70393e-09	1.15192e-07	0	0	3.50276	68.0022	SRC;ITGB3;ITGA2B;PIK3CD;PRKCZ;ACTB;MYL12A;ADCY6;MYLK;MYL12B;PIK3R5;GNAI2;MAPK1;LYN;VASP;GUCY1A1;PLA2G4F;FCER1G;VWF;ITGA2;PLA2G4A;GP1BA;F2;MAPK14;GP5;RHOA;MAPK13;APBB1IP;VAMP8;GP9;FCGR2A;P2RX1;TBXAS1;ORAI1;LCP2;TLN1;PLCB1;FERMT3;F2RL3
	platelet degranulation (GO:0002576)	39/124	3.70393e-09	1.25811e-06	0	0	3.50276	68.0022	CFD;LGALS3BP;TOR4A;CD63;ECM1;ORM1;WDR1;ITGB3;SERPINE1;ITGA2B;STXBP2;PLEK;ENDOD1;F13A1;CLU;THBS1;CYB5R1;LAMP2;PSAP;CDC37L1;CD36;VTI1B;LYN;SRGN;VWF;APLP2;ACTN1;ANXA5;FN1;RAB27B;ACTN4;PPBP;LHFPL2;GTPBP2;SELP;CD9;TLN1;ALDOA;FERMT3	.	Lipid and atherosclerosis	56/215	4.7291e-09	1.33705e-07	0	0	2.69738	51.7076	CXCL8;NCF1;NCF2;NCF4;PIK3CD;CALML4;VLDLR;IKBKB;PYCARD;CASP7;CASP3;CASP1;IL12B;CD36;RAC1;LBP;JAK2;MAP2K4;HSP90AA1;IL18;CYBA;IRAK4;MMP9;RHOA;VAV1;TIRAP;TNFRSF1A;DDIT3;IL1B;PPARG;PLCB1;TLR4;TLR2;SRC;LY96;TANK;RXRA;IRAK1;MAPK1;CD14;LDLR;LYN;CYP2J2;JUN;STAT3;MAPK14;SOD2;SELE;MAPK13;NFKBIA;SELP;FAS;CALM2;MYD88;BCL2L1;NFE2L2
	toll-like receptor signaling pathway (GO:0002224)	31/86	3.77653e-09	1.25811e-06	0	0	4.29535	83.306	UBE2D3;ITGB2;UBE2D1;LY96;CTSS;IKBKB;IRAK1;IRAK2;CTSK;UBC;RIPK1;LBP;CD36;FADD;CD14;CTSB;S100A1;IRAK4;CNPY3;TIRAP;MAPKAPK3;TNIP1;TNIP2;TNIP3;MAPKAPK2;S100A9;TLR4;S100A8;MYD88;TLR2;LGMN	.	Osteoclast differentiation	39/127	7.88239e-09	2.04285e-07	0	0	3.38277	63.118	CSF1R;SPI1;NCF1;NCF2;ITGB3;NCF4;PIK3CD;SIRPB1;LILRA4;IKBKB;SOCS3;CTSK;SIRPA;MAPK1;RAC1;FCGR1A;JUNB;IFNAR2;JUN;IL1R1;IFNGR1;IFNGR2;STAT2;CYBA;GAB2;TYK2;MAPK14;FOSL2;TNFRSF1A;MAPK13;NFKBIA;TYROBP;FCGR2A;TEC;IL1B;GRB2;LCP2;PPARG;FCGR2B
	pattern recognition receptor signaling pathway (GO:0002221)	22/48	3.78773e-09	1.25811e-06	0	0	6.43391	124.763	FCN1;S100A1;LY96;IRAK4;CNPY3;CTSS;IRAK1;MAPKAPK3;IRAK2;CTSK;MAPKAPK2;FFAR2;LBP;CD36;CD14;S100A9;TLR4;S100A8;MYD88;CTSB;TLR2;LGMN	.	Phagosome	43/152	2.12577e-08	5.0855e-07	0	0	3.01279	53.2256	SCARB1;RAB5C;NCF1;NCF2;ITGB3;NCF4;ITGB2;TCIRG1;THBS2;CORO1A;THBS1;ACTB;CTSS;FCAR;LAMP1;CLEC7A;LAMP2;TUBB1;CD14;CD36;RAC1;ATP6V1E1;FCGR1A;ATP6V1D;RILP;ATP6V1C1;ATP6V0A1;ATP6V1F;ATP6V0B;ATP6V0E1;ATP6AP1;ITGA2;CYBA;MARCO;FCGR2A;HGS;ATP6V1B2;ATP6V0D1;RAB7B;FCGR2B;TLR4;RAB7A;TLR2
	cellular protein catabolic process (GO:0044257)	25/62	8.60507e-09	2.65405e-06	0	0	5.14109	95.4747	CTSZ;CLTA;AP2A1;DENND3;VLDLR;TCIRG1;AP2A2;RNF5;CTSS;SCPEP1;CTSK;CAPN2;AP2S1;CTSH;RIPK1;CTSF;CTSC;CTSB;ADAMTS7;BNIP3L;BNIP3;UBE2G1;PSMA6;RAB7A;LGMN	.	Chemokine signaling pathway	50/192	3.12426e-08	6.94032e-07	0	0	2.69226	46.5262	GSK3A;CXCL8;NCF1;PIK3CD;CXCL5;CRKL;CXCL16;IKBKB;PREX1;RAC1;JAK2;JAK3;PRKCD;RHOA;VAV1;FGR;HCK;PARD3;RAF1;PLCB1;CCL14;SRC;PXN;WAS;PRKCZ;ADCY6;PIK3R5;GNAI2;GNG10;PAK1;GRK2;GNG2;CXCR1;GNG5;GNG4;GNG7;CXCR2;MAPK1;PTK2B;CCL16;CCR1;LYN;STAT5B;STAT2;STAT3;PPBP;GNG11;NFKBIA;GNB2;GRB2
	response to cytokine (GO:0034097)	41/138	9.62033e-09	2.76937e-06	0	0	3.22744	59.5766	IFITM3;HDAC4;CSF1R;IFITM1;FLT3;SRC;MEFV;CXCL16;IL18BP;IRAK1;IRAK2;CASP3;TIMP2;CASP1;RIPK1;LGALS9;JAK2;JUNB;IL6R;JAK3;MCL1;IFNAR2;JUN;GCH1;IL1R1;SLC11A1;STAT3;TRAFD1;SELE;NLRP12;MAPKAPK3;MAPKAPK2;CHI3L1;HCLS1;PTPN9;PTPN6;PTPN5;MYD88;PTPN2;IL18R1;BCL2L1	.	Kaposi sarcoma-associated herpesvirus infection	50/193	3.74358e-08	7.7617e-07	0	0	2.67328	45.7147	CDKN1A;CXCL8;PIK3CD;CALML4;IKBKB;PREX1;ZFP36;CASP3;RAC1;JAK2;IFNAR2;ATG3;GABARAPL2;MAP2K4;GABARAPL1;MAP2K2;IFNGR1;TYK2;TNFRSF1A;HCK;MAPKAPK2;RAF1;BECN1;SRC;GABARAP;PIK3R5;GNG10;GNG2;GNG5;GNG4;GNG7;UBC;E2F2;MAPK1;E2F3;FADD;CCR1;LYN;TCF7L2;JUN;STAT2;STAT3;MAPK14;GNG11;MAPK13;NFKBIA;CDK6;GNB2;FAS;CALM2
	regulated exocytosis (GO:0045055)	42/148	2.79702e-08	7.54847e-06	0	0	3.02521	52.6149	CFD;LGALS3BP;TOR4A;CD63;ECM1;ORM1;WDR1;ITGB3;SERPINE1;ITGA2B;STXBP2;PLEK;ENDOD1;F13A1;CLU;THBS1;CYB5R1;LAMP2;PSAP;CDC37L1;CD36;VTI1B;RAB11FIP5;LYN;SRGN;VWF;APLP2;ACTN1;ANXA5;FN1;RAB27B;ACTN4;PPBP;LHFPL2;GTPBP2;SELP;RAB31;CD9;TLN1;ALDOA;STEAP2;FERMT3	.	Endocytosis	60/252	4.93978e-08	9.6017e-07	0	0	2.393	40.2583	ARF3;ARF1;ZFYVE9;ARPC1B;CLTB;CLTA;AP2A1;AP2A2;CAPZB;WASHC1;SH3GL1;WASHC3;ACTR3;VPS37C;ARAP3;ARAP1;VPS37B;RHOA;DNM2;EPN2;DNM3;RAB31;HGS;PARD3;CHMP4B;CHMP3;RAB7A;CHMP5;RAB5C;SRC;VPS26A;PRKCZ;SNX3;GRK2;CYTH4;CXCR1;CXCR2;AP2S1;PIP5K1B;PIP5K1C;LDLR;RAB11FIP5;GIT2;IQSEC1;SMURF1;ARPC4;ARPC5;RAB11A;IGF2R;EHD1;EHD2;EHD4;ARPC3;IL2RA;CAPZA2;CHMP2A;FOLR3;FOLR2;SMAP2;SPG21
	response to lipid (GO:0033993)	40/140	4.8343e-08	1.22791e-05	0	0	3.05241	51.4177	RARG;CXCL8;HMGB2;LY96;CXCL5;RXRA;IRAK1;BGLAP;CTSH;LGALS9;LBP;CD36;JAK2;JUNB;RELT;CDKN2D;STAT5B;JUN;GCH1;VDR;SLC11A1;STAT3;NR1H3;PPBP;TNFRSF1B;SELE;TIRAP;TNFRSF1A;SELP;ASXL1;MAPKAPK3;MAPKAPK2;RARA;ALPL;FAS;PPARG;LTBR;TRIB1;TLR4;PPARD	.	NOD-like receptor signaling pathway	47/181	8.7954e-08	1.60904e-06	0	0	2.67952	43.5328	NLRX1;CXCL8;NOD1;NLRC4;NOD2;MEFV;TANK;GABARAP;PYCARD;IKBKB;PSTPIP1;CASP4;CASP1;MAPK1;RIPK1;FADD;NLRP1;CTSB;IFNAR2;GSDMD;GABARAPL2;GABARAPL1;JUN;HSP90AA1;STAT2;PRKCD;CARD9;IL18;CYBA;IRAK4;TYK2;MAPK14;RHOA;MAPK13;NFKBIA;NLRP12;ATG16L1;IL1B;TXNIP;VDAC1;RBCK1;DEFB4A;PLCB1;TLR4;NAIP;MYD88;BCL2L1
	phosphorylation (GO:0016310)	81/386	1.04963e-07	2.51795e-05	0	0	2.03928	32.7705	RET;DGKG;ACVRL1;GSK3A;DGKD;TP53RK;GMFG;PIK3CD;HK1;IKBKB;LIPE;STK11;RPS6KA1;PIM1;JAK2;MAP3K6;JAK3;XYLB;ACVR1;PRKCD;LMTK2;CSNK1E;TYK2;PHKA2;DGKZ;FGR;HCK;MAPKAPK2;UQCRC1;RARA;BMP2K;FAM20C;ULK1;ALPK3;ERG;FAM20A;SGK1;RAF1;RBKS;ACVR1B;PRKCZ;AURKC;STK3;GK5;PAK1;FGGY;IRAK1;IRAK2;MKNK1;PGK1;MAP3K20;STK38L;PTK2B;MAPK1;NADK;MARK2;LYN;SRPK2;GK;PLK2;GLYCTK;NEK6;TNK2;INSR;LIMK2;PLK1;STAT3;TNK1;CDC42BPB;BMX;MER…	.	Pathways in cancer	103/531	1.38878e-07	2.3995e-06	0	0	1.85287	29.2561	SPI1;ITGA2B;CALML4;CRKL;CCND3;TFG;PIM1;IL12B;IL6R;IL13RA1;IFNAR2;IL15RA;MAP2K2;IL4R;IL23A;RAF1;CSF1R;NOTCH3;NOTCH1;CTBP2;MAX;MGST1;MGST2;TGFA;CSF2RB;RASGRP4;GNG10;HMOX1;FADD;STAT5A;GSTM3;STAT5B;JUN;GADD45B;FZD4;GADD45A;FN1;GNG11;GADD45G;NFKBIA;CDK6;IL7;GNB2;GRB2;CALM2;BCL2L1;NFE2L2;RET;CDKN1A;CXCL8;FLT3;FLT4;PIK3CD;LAMC1;GLI1;BBC3;IKBKB;CASP7;CASP3;ELOC;RAC1;JAK2;JAK3;ARHGEF11;HSP90AA1;IFNGR1;IFN…
	phagosome maturation (GO:0090382)	16/32	1.12166e-07	2.54913e-05	0	0	7.58839	121.439	ATP6V0B;ATP6V0E1;TCIRG1;CORO1A;RAB43;RAB32;RAB20;RAB31;ATP6V1B2;ATP6V1E1;ATP6V0D1;ATP6V1D;ATP6V1C1;ATP6V1F;ATP6V0A1;RAB7A	.	Legionellosis	22/57	1.6863e-07	2.7602e-06	0	0	4.77703	74.5005	RAB1A;ARF1;CXCL8;RAB1B;BNIP3;ITGB2;IL18;NLRC4;CLK4;PYCARD;CLK1;NFKBIA;CASP7;CASP3;IL1B;CASP1;IL12B;CD14;TLR4;NAIP;MYD88;TLR2
	receptor metabolic process (GO:0043112)	22/58	2.41765e-07	4.97115e-05	0	0	4.64408	70.7539	IL10;BECN1;RAMP2;CXCL8;FCER1G;RAMP3;LRP1;SMURF1;ITGB2;LMTK2;DNM2;DNM3;ACE2;RAB31;GRK2;CXCR1;CXCR2;CD9;GRB2;CD36;PICALM;LGMN	.	Autophagy	38/137	2.40808e-07	3.74456e-06	0	0	2.92671	44.6008	BECN1;RAB1A;MTMR3;STX17;PIK3CD;ZFYVE1;TANK;GABARAP;STK11;DEPTOR;LAMP1;TP53INP2;LAMP2;MAPK1;SUPT20H;ATG7;CTSD;CTSB;ATG3;GABARAPL2;GABARAPL1;MAP2K2;BNIP3;ATG9A;PRKCD;WIPI1;VAMP8;VMP1;ATG16L2;ATG16L1;DDIT4;ATG2A;ULK1;RAF1;RAB7B;BCL2L1;ATG4D;RAB7A
	autophagosome assembly (GO:0000045)	22/58	2.41765e-07	4.97115e-05	0	0	4.64408	70.7539	ATG3;GABARAPL2;RAB1A;BECN1;GABARAPL1;STX17;SMURF1;RAB1B;ATG9A;WIPI1;WDR45;GABARAP;MAP1LC3B;MAP1LC3A;ATG16L2;ATG16L1;TP53INP2;ATG2A;ULK1;ATG7;ATG4D;RAB7A	.	Fluid shear stress and atherosclerosis	37/139	1.04348e-06	1.54534e-05	0	0	2.7642	38.0712	NCF1;SDC4;NCF2;SRC;ITGB3;ITGA2B;MGST1;MGST2;PIK3CD;CALML4;PRKCZ;ACTB;IKBKB;MAPK7;GPC1;HMOX1;RAC1;ACVR1;MAP2K4;GSTM3;JUN;HSP90AA1;IL1R1;DUSP1;IL1R2;CYBA;MAPK14;SELE;MMP9;ACVR2B;RHOA;ASS1;TNFRSF1A;MAPK13;IL1B;CALM2;NFE2L2
	response to lipopolysaccharide (GO:0032496)	41/155	3.35255e-07	6.58014e-05	0	0	2.7435	40.9011	SCARB1;CXCL8;SERPINE1;HMGB2;LY96;CXCL5;PYCARD;ZFP36;SBNO2;IRAK1;CASP1;LGALS9;CD14;LBP;JAK2;JUNB;RELT;IL10;JUN;GCH1;VDR;SLC11A1;ACOD1;NR1H3;PPBP;TNFRSF1B;MAPK14;SELE;TIRAP;RHOA;TNFRSF1A;SELP;MAPKAPK3;TNIP1;TNIP2;TNIP3;MAPKAPK2;FAS;LTBR;TRIB1;TLR4	.	Bacterial invasion of epithelial cells	25/77	1.16778e-06	1.57904e-05	0	0	3.65497	49.9283	SRC;ARPC1B;PXN;CLTB;CLTA;PIK3CD;ACTB;CRKL;CTNNA1;CTNNA3;RAC1;WASF2;ACTR3;RHOG;FN1;ARPC4;ARPC5;RHOA;DNM2;DNM3;ARPC3;ELMO2;HCLS1;ELMO3;DOCK1
	positive regulation of endocytosis (GO:0045807)	23/64	4.04854e-07	7.6007e-05	0	0	4.26371	62.7606	CD63;HIP1;FCER1G;CD151;LRP1;HFE;SLC11A1;SERPINE1;HIP1R;CYBA;ABCA7;MERTK;CLU;SIRPB1;PYCARD;RAB21;IL1B;FLOT1;PPT1;ANKFY1;SIRPA;FCGR2B;LDLR	.	Leishmaniasis	25/77	1.16778e-06	1.57904e-05	0	0	3.65497	49.9283	NCF1;NCF2;ITGB2;NCF4;IRAK1;IL12B;MAPK1;JAK2;FCGR1A;IL10;JUN;MARCKSL1;IFNGR1;IFNGR2;CYBA;IRAK4;MAPK14;MAPK13;NFKBIA;FCGR2A;IL1B;PTPN6;TLR4;MYD88;TLR2
	response to molecule of bacterial origin (GO:0002237)	30/98	4.38345e-07	7.88655e-05	0	0	3.35817	49.1645	CXCL8;HMGB2;LY96;CXCL5;IRAK1;LGALS9;CD14;LBP;JAK2;JUNB;RELT;IL10;JUN;GCH1;SLC11A1;ACOD1;PPBP;TNFRSF1B;SELE;TIRAP;TNFRSF1A;SELP;MAPKAPK3;MAPKAPK2;FAS;LTBR;TRIB1;CD24;FCGR2B;TLR4	.	C-type lectin receptor signaling pathway	30/104	1.77271e-06	2.29714e-05	0	0	3.08484	40.8525	SRC;PIK3CD;CALML4;LSP1;PYCARD;IKBKB;PAK1;CLEC7A;CASP1;IL12B;MAPK1;CLEC1B;IL10;JUN;FCER1G;STAT2;PRKCD;CARD9;MAPK14;RHOA;MAPK13;NFKBIA;IL23A;IL1B;IRF1;MAPKAPK2;BCL3;CLEC4E;RAF1;CALM2
	positive regulation of response to external stimulus (GO:0032103)	28/90	7.28879e-07	0.000125892	0	0	3.43581	48.5541	PTGER4;SERPINE1;LPL;MGST2;THBS1;PPM1F;IL12B;S100A12;STX4;STX3;SCARF1;CCL16;IL18;ACOD1;CYBA;F2;USF1;TNFRSF1A;MAPK13;NFKBIA;NLRP12;TNIP1;IL23A;S100A9;TLR4;OPTN;S100A8;TLR2	.	Human cytomegalovirus infection	51/225	2.31979e-06	2.88582e-05	0	0	2.23795	29.0353	CDKN1A;CXCL8;ITGB3;PIK3CD;CALML4;CRKL;IKBKB;CASP3;RAC1;IL6R;ARHGEF11;MAP2K2;IL1R1;RHOA;TNFRSF1A;IL1B;PLCB1;RAF1;CREB5;PTGER4;SRC;PXN;ADCY6;GNAI2;GNG10;GNG2;GNG5;GNG4;GNA11;GNG7;CXCR2;EIF4EBP1;E2F2;MAPK1;PTK2B;RIPK1;E2F3;FADD;CCR1;IL10RB;IL10RA;STAT3;MAPK14;GNG11;MAPK13;NFKBIA;CDK6;GNB2;FAS;GRB2;CALM2
	positive regulation of tumor necrosis factor superfamily cytokine production (GO:1903557)	15/32	8.15171e-07	0.000132737	0	0	6.69238	93.8263	LY96;CYBA;NOD2;CLU;TIRAP;PYCARD;IL23A;IL12B;RIPK1;LBP;FADD;CD14;JAK2;TLR4;TLR2	.	JAK-STAT signaling pathway	40/162	3.08197e-06	3.68651e-05	0	0	2.49884	31.7102	CDKN1A;MPL;PIK3CD;CSF2RB;IL22RA2;SOCS3;CCND3;PIM1;IL21R;IL12B;SOCS6;JAK2;IL6R;JAK3;IL13RA1;MCL1;IFNAR2;STAT5A;IL10;IL15RA;STAT5B;IL4R;CISH;IFNGR1;IL10RB;IFNGR2;IL10RA;STAT2;STAT3;OSM;TYK2;IL23A;IL7;IL2RA;IL3RA;GRB2;PTPN6;RAF1;PTPN2;BCL2L1
	ferric iron transport (GO:0015682)	16/36	8.60731e-07	0.000132737	0	0	6.06933	84.7612	STEAP3;ATP6V0B;ATP6V0E1;ATP6AP1;HFE;LMTK2;TCIRG1;MCOLN1;DNM2;ATP6V1B2;ATP6V1E1;ATP6V0D1;ATP6V1D;ATP6V1C1;ATP6V1F;ATP6V0A1	.	Apoptosis	36/142	4.94788e-06	5.69922e-05	0	0	2.58629	31.5955	BECN1;CTSZ;PIK3CD;CSF2RB;ACTB;CTSS;BBC3;LMNB1;IKBKB;CASP7;CASP3;CTSK;CAPN2;CTSH;MAPK1;RIPK1;CAPN1;FADD;CTSF;CTSD;CTSC;MCL1;CTSB;JUN;PARP3;MAP2K2;GADD45B;GADD45A;GADD45G;TNFRSF1A;NFKBIA;DDIT3;IL3RA;FAS;RAF1;BCL2L1
	transferrin transport (GO:0033572)	16/36	8.60731e-07	0.000132737	0	0	6.06933	84.7612	STEAP3;ATP6V0B;ATP6V0E1;ATP6AP1;HFE;LMTK2;TCIRG1;MCOLN1;DNM2;ATP6V1B2;ATP6V1E1;ATP6V0D1;ATP6V1D;ATP6V1C1;ATP6V1F;ATP6V0A1	.	Neutrophil extracellular trap formation	44/189	5.38571e-06	5.89043e-05	0	0	2.31371	28.0694	HDAC4;HDAC5;SELPLG;NCF1;NCF2;SRC;ITGB3;AQP9;HDAC11;ITGA2B;NCF4;C5AR1;ITGB2;PIK3CD;MACROH2A1;ACTB;CLEC7A;CASP4;H3C12;CASP1;MAPK1;RAC1;FCGR1A;ATG7;H3-3B;GSDMD;MAP2K2;H2AC6;VWF;H2BC5;H2AC4;CYBA;GP1BA;MAPK14;MAPK13;SELP;H2AJ;FCGR2A;VDAC1;PADI4;RAF1;PLCB1;TLR4;TLR2
	protein homooligomerization (GO:0051260)	46/190	1.05353e-06	0.000156868	0	0	2.43794	33.5542	RYR1;CDA;TOR2A;DGKD;B4GALT1;DPYS;HM13;MGST1;IGHMBP2;BRK1;NLRC4;PKD2;TANK;FGFRL1;CRYZ;SCUBE3;RXRA;NACC2;FLOT1;HMOX1;STOM;RIPK1;EMILIN1;KCNJ2;GSDMD;FCER1G;VWF;GCH1;GPX3;TMEM120A;TAF10;OLFM4;MCOLN1;SOD2;EHD1;EHD4;ATG16L1;CTH;ALOX5AP;CHMP2A;CHMP4B;HPRT1;TMCC1;MICU1;ALDOA;CRYAB	.	Synaptic vesicle cycle	24/78	5.49269e-06	5.89043e-05	0	0	3.37697	40.9022	ATP6V0B;ATP6V0E1;UNC13A;SLC1A1;CLTB;CLTA;AP2A1;TCIRG1;AP2A2;SLC6A2;SLC6A4;DNM2;DNM3;SLC6A9;ATP6V1B2;AP2S1;STX3;ATP6V1E1;ATP6V0D1;STX2;ATP6V1D;ATP6V1C1;ATP6V0A1;ATP6V1F
	macroautophagy (GO:0016236)	31/110	2.07446e-06	0.000289975	0	0	2.98636	39.0789	BECN1;MTMR3;STX17;SRC;PRKAG2;TCIRG1;ZFYVE1;GABARAP;MAP1LC3B;MAP1LC3A;LAMP2;UBC;ATG7;UBXN6;ATG3;GABARAPL2;GABARAPL1;VPS37C;WIPI1;VPS37B;VAMP8;VMP1;PINK1;HGS;ATG16L1;CHMP2A;CHMP4B;CHMP3;ULK1;VDAC1;TOMM6	.	Ferroptosis	16/41	6.83938e-06	7.09016e-05	0	0	4.85409	57.7288	STEAP3;GPX4;ACSL1;GSS;SLC40A1;ACSL6;SLC3A2;SAT1;MAP1LC3B;MAP1LC3A;FTH1;LPCAT3;HMOX1;SLC39A8;ATG7;FTL
	mitochondrion disassembly (GO:0061726)	16/38	2.0818e-06	0.000289975	0	0	5.51695	72.1743	BECN1;ATG3;GABARAPL2;GABARAPL1;BNIP3;ATG9A;WIPI1;WDR45;GABARAP;MAP1LC3B;PINK1;MAP1LC3A;ATG2A;ATG7;MARK2;ATG4D	.	Chagas disease	28/102	1.09865e-05	0.000110219	0	0	2.87669	32.8485	CXCL8;SERPINE1;PIK3CD;GNAI2;IKBKB;IRAK1;GNA11;IL12B;MAPK1;FADD;IL10;MAP2K4;JUN;ACE;IFNGR1;IFNGR2;IRAK4;MAPK14;TNFRSF1A;MAPK13;NFKBIA;GNAL;IL1B;FAS;PLCB1;TLR4;MYD88;TLR2
	cellular response to oxygen-containing compound (GO:1901701)	59/274	2.30435e-06	0.000302341	0	0	2.0977	27.2297	RET;RARG;CXCL8;NCF1;SERPINE1;MPV17L;HMGB2;PKD2;ACTB;PYCARD;ZFP36;SESN2;PDK4;CAPN2;CASP1;PDK3;FFAR2;LBP;IL10;TESC;PRKCD;TPM1;ACOD1;TNFRSF1B;MMP9;RHOA;TIRAP;FAM210B;RARA;TLR4;TLR2;RAMP3;PXN;TWF2;ADCY6;PRDX5;SBNO2;GNG2;PTK2B;MAPK1;ROMO1;CD14;LYN;JUN;FZD4;VDR;NR1H3;MAPK14;P2RX4;TNIP1;TNIP2;TNIP3;NEURL1;LAMTOR2;LAMTOR1;LAMTOR3;SLC26A6;CPEB4;LAMTOR5	.	Necroptosis	37/159	2.93889e-05	0.000285623	0	0	2.30842	24.0881	MACROH2A1;PYCARD;FTH1;SMPD1;CAPN2;CASP1;RIPK1;CAPN1;FADD;JAK2;GLUL;JAK3;IFNAR2;STAT5A;STAT5B;HSP90AA1;PLA2G4F;H2AC6;IFNGR1;H2AC4;IFNGR2;STAT2;STAT3;PLA2G4A;TYK2;TNFRSF1A;H2AJ;IL1B;CHMP2A;CHMP4B;CHMP3;FAS;VDAC1;RBCK1;TLR4;FTL;CHMP5
	negative regulation of apoptotic signaling pathway (GO:2001234)	22/65	2.31062e-06	0.000302341	0	0	3.88652	50.4392	ACVR1;SLC35F6;TCF7L2;PRELID1;ACAA2;GPX1;SRC;MPV17L;PLAUR;NOL3;CLU;MMP9;THBS1;SH3RF1;HERPUD1;LGALS3;PINK1;TMBIM6;RIPK1;BCL2L2;MCL1;BCL2L1	.	Leukocyte transendothelial migration	29/114	3.71077e-05	0.000349712	0	0	2.59335	26.4566	NCF1;NCF2;CTNND1;NCF4;PXN;ITGB2;PIK3CD;THY1;F11R;ACTB;MYL12A;MYL12B;GNAI2;CTNNA1;PTK2B;CTNNA3;RAC1;JAM3;VASP;ACTN1;CYBA;ACTN4;MAPK14;MMP9;RHOA;VAV1;MAPK13;MYL9;SIPA1
	vascular endothelial growth factor receptor signaling pathway (GO:0048010)	23/70	2.45493e-06	0.000304011	0	0	3.71814	48.0287	HSP90AA1;NCF1;NCF2;SRC;FLT4;ITGB3;NCF4;PXN;BRK1;CYBA;BAIAP2;MAPK14;ACTB;RHOA;VAV1;MAPK13;MAPKAPK3;MAPKAPK2;ELMO2;PTK2B;RAC1;DOCK1;WASF2	.	HIF-1 signaling pathway	28/109	4.15101e-05	0.000379695	0	0	2.62704	26.5057	CDKN1A;PFKFB3;SERPINE1;PIK3CD;ENO1;HK1;LDHB;HK3;LDHA;MKNK1;EIF4EBP1;PGK1;HMOX1;MAPK1;ELOC;IL6R;EGLN3;MAP2K2;EGLN2;IFNGR1;INSR;IFNGR2;STAT3;ALDOC;LTBR;ALDOA;GAPDH;TLR4
	positive regulation of tumor necrosis factor production (GO:0032760)	18/47	2.52932e-06	0.000304011	0	0	4.71061	60.7083	ORM1;LY96;CYBA;NOD2;THBS1;CLU;TIRAP;PYCARD;IL23A;IL12B;RIPK1;LBP;FADD;CD14;LGALS9;JAK2;TLR4;TLR2	.	Hepatitis B	37/162	4.51804e-05	0.00040146	0	0	2.25263	22.5372	CDKN1A;CXCL8;SRC;PIK3CD;IKBKB;IRAK1;CASP3;E2F2;MAPK1;PTK2B;E2F3;FADD;JAK2;JAK3;STAT5A;MAP2K4;STAT5B;JUN;MAP2K2;ATP6AP1;STAT2;STAT3;IRAK4;TYK2;MAPK14;MMP9;TIRAP;DDB2;MAPK13;NFKBIA;FAS;GRB2;RAF1;TLR4;MYD88;CREB5;TLR2
	autophagosome organization (GO:1905037)	20/56	2.55601e-06	0.000304011	0	0	4.21825	54.3187	ATG3;GABARAPL2;RAB1A;BECN1;GABARAPL1;RAB1B;ATG9A;WIPI1;WDR45;GABARAP;MAP1LC3B;MAP1LC3A;ATG16L2;ATG16L1;TP53INP2;ATG2A;ULK1;ATG7;ATG4D;RAB7A	.	Acute myeloid leukemia	20/67	5.28325e-05	0.000456414	0	0	3.22898	31.8003	STAT5A;CSF1R;STAT5B;TCF7L2;SPI1;MAP2K2;FLT3;CEBPE;STAT3;PIK3CD;IKBKB;PIM1;RARA;EIF4EBP1;MAPK1;GRB2;CD14;RAF1;FCGR1A;PPARD
	regulation of apoptotic process (GO:0042981)	139/815	2.61269e-06	0.000304011	0	0	1.58586	20.3865	STEAP3;ITSN1;CLU;PYCARD;PREX1;MAEA;CFL1;CLEC5A;RPS6KA1;PIM1;ARL6IP5;CAPN3;PROK2;PHLDA3;BNIP3L;MAP2K4;MAP2K2;ACTN1;LMTK2;ACTN4;WDR73;TIAM2;ROR2;ATF5;RAF1;CARD14;NAIP;CSF1R;PSEN1;GATA1;NDRG1;STK3;APH1A;PRDX5;IRAK1;BAG3;UBC;MAP3K20;RIPK1;FADD;ATG7;MCL1;JUN;PRELID1;GADD45B;GADD45A;PLK2;INSR;PLK1;SIAH1;CIDEC;GADD45G;NFKBIA;STK24;BCL6;IL7;BCL3;PPT1;MYD88;MAP3K11;BCL2L2;BCL2L1;RET;RARG;CSRNP3;HIP1;FLT3;…	.	p53 signaling pathway	21/73	6.34281e-05	0.000533139	0	0	3.06488	29.6239	CDKN1A;STEAP3;CD82;GADD45B;GADD45A;SERPINE1;SIAH1;SHISA5;PPM1D;THBS1;BBC3;DDB2;GADD45G;CCND3;COP1;CDK6;CASP3;SESN2;FAS;SFN;BCL2L1
	vesicle-mediated transport (GO:0016192)	80/410	2.67541e-06	0.000304011	0	0	1.85801	23.8409	ZFYVE9;NCF4;SNX10;AP2A1;RAB43;RPH3A;RINL;DNER;TOM1;ANKFY1;DENND5A;RAC1;WASHC1;VPS39;TBC1D10B;JAGN1;ANXA2;APLP2;AKTIP;DENND2A;RHOG;ZFYVE21;LMTK2;ARAP3;CSNK1E;ARAP1;DNM2;VAMP8;DNM3;PLIN3;CHMP3;TBC1D23;RAB7B;SFT2D1;STEAP2;RHOQ;RAB7A;CHMP5;LRPAP1;RAB1A;BECN1;TMEM87A;RAB5C;LRP1;STX17;WAS;VPS26A;DENND3;SNX33;STX11;ADAP2;CUX1;MYO6;STX6;STX5;STX4;STX3;STX2;LDLR;RILP;ATP9A;VTI1B;GIT2;SYT4;SORT1;RAB27B;ADA…	.	Toxoplasmosis	28/112	6.99372e-05	0.000572381	0	0	2.53279	24.2335	LY96;LAMC1;PIK3R5;GNAI2;IKBKB;IRAK1;CASP3;ALOX5;IL12B;MAPK1;JAK2;LDLR;IL10;IFNGR1;IL10RB;IFNGR2;IL10RA;STAT3;IRAK4;TYK2;MAPK14;TNFRSF1A;MAPK13;NFKBIA;TLR4;MYD88;BCL2L1;TLR2
	positive regulation of reactive oxygen species metabolic process (GO:2000379)	16/39	3.14725e-06	0.000348457	0	0	5.27678	66.8515	CDKN1A;GADD45A;ITGB2;PRKCD;ACOD1;CYBA;F2;MAPK14;THBS1;ACE2;ROMO1;RIPK1;GRB2;CD36;XDH;TLR4	.	FoxO signaling pathway	31/131	9.0183e-05	0.000709989	0	0	2.3564	21.9468	CDKN1A;PIK3CD;PRKAG2;FOXO4;GABARAP;IKBKB;STK11;MAPK1;HOMER3;IL10;CDKN2D;GABARAPL2;GABARAPL1;CDKN2B;MAP2K2;GADD45B;GADD45A;INSR;PLK2;BNIP3;PLK1;STAT3;CSNK1E;MAPK14;SOD2;GADD45G;MAPK13;BCL6;GRB2;RAF1;SGK1
	regulation of cell migration (GO:0030334)	65/316	3.75379e-06	0.000405221	0	0	1.98069	24.7442	RET;ACVRL1;IFITM1;CITED2;SERPINE1;PIK3CD;ADARB1;MYLK;CXCL16;DACH1;PLAU;HMCN2;ENPP2;CTSH;RAC1;WASHC1;ACVR1;ANXA1;SPHK1;TPM1;ARAP3;ACTN4;MMP9;RHOA;FGR;IL1B;NUMB;ROR2;SGK1;CSF1R;CEMIP;SEMA7A;NOTCH1;CD151;SEMA3C;SRC;PRR5L;THY1;THBS1;ADGRG3;SDCBP;PAK1;PLXNA2;PTK2B;STX4;SRGAP2;SRGAP1;ARSB;CCR1;CARMIL1;SEMA4A;ACE;SEMA4D;INSR;FUZ;SOD2;SORL1;IGSF10;STK24;DLC1;SNAI1;PLXNB3;PLXNB2;LGR6;FERMT3	.	Apelin signaling pathway	32/137	9.13169e-05	0.000709989	0	0	2.31693	21.5502	RYR1;HDAC4;NOTCH3;BECN1;HDAC5;SERPINE1;PRKAG2;CALML4;SLC8A1;GABARAP;ADCY6;MYLK;PIK3R5;GNAI2;LIPE;GNG10;GNG2;GNG5;GNG4;GNG7;MAPK1;GABARAPL2;GABARAPL1;MAP2K2;SPHK2;SPHK1;GNG11;ACTA2;GNB2;RAF1;PLCB1;CALM2
	autophagy of mitochondrion (GO:0000422)	16/40	4.67695e-06	0.000492563	0	0	5.05663	62.0593	BECN1;ATG3;GABARAPL2;GABARAPL1;BNIP3;ATG9A;WIPI1;WDR45;GABARAP;MAP1LC3B;PINK1;MAP1LC3A;ATG2A;ATG7;MARK2;ATG4D	.	Regulation of actin cytoskeleton	45/218	0.000100831	0.000764838	0	0	1.981	18.2293	SRC;ARPC1B;ITGB3;ITGA2B;PXN;ITGB2;BRK1;PIK3CD;ACTB;MYL12A;FGD1;CRKL;MYLK;MYL12B;FGD3;PAK1;CFL1;ITGAX;MAPK1;PIP5K1B;ITGB7;PIP5K1C;RAC1;WASF2;ACTR3;GSN;MAP2K2;ACTN1;ITGA2;LIMK2;FN1;ARPC4;ACTN4;ARPC5;F2;BAIAP2;SSH3;RHOA;VAV1;ARPC3;MYH9;RAF1;MYL9;DOCK1;ITGA9
	regulation of receptor-mediated endocytosis (GO:0048259)	15/36	5.07664e-06	0.000496846	0	0	5.41641	66.0307	LRPAP1;ARF1;HIP1;HFE;TNK2;SERPINE1;HIP1R;ARAP3;CLU;RAB21;FLOT1;PPT1;BMP2K;RAC1;PICALM	.	Vibrio cholerae infection	16/50	0.000116778	0.000863485	0	0	3.56736	32.3033	ARF1;ATP6V0B;ATP6V0E1;ATP6AP1;KDELR1;TCIRG1;ACTB;ATP6V1B2;KDELR2;KDELR3;ATP6V1E1;ATP6V0D1;ATP6V1D;ATP6V1C1;ATP6V0A1;ATP6V1F
	regulation of reactive oxygen species metabolic process (GO:2000377)	18/49	5.0787e-06	0.000496846	0	0	4.4062	53.7136	CDKN1A;GADD45A;ACOD1;F2;MAPK14;THBS1;ACE2;BST1;PINK1;STK17A;PDK3;ROMO1;RIPK1;GRB2;RAC1;BCO2;XDH;SLC25A33	.	Chronic myeloid leukemia	21/76	0.000120185	0.000863485	0	0	2.89721	26.1516	STAT5A;STAT5B;CDKN1A;MAP2K2;CTBP2;GADD45B;GADD45A;PIK3CD;GAB2;CRKL;DDB2;GADD45G;IKBKB;NFKBIA;CDK6;E2F2;MAPK1;E2F3;GRB2;RAF1;BCL2L1
	regulation of cell proliferation (GO:0042127)	127/740	5.14667e-06	0.000496846	0	0	1.5951	19.4238	IFITM1;ATP8A2;ADARB1;CRKL;STK11;CAPNS1;FTH1;PROK2;CAPN1;JUNB;IL6R;TNS2;RPS9;EREG;ACE2;HGS;ROR2;ATF5;RAF1;CSF1R;NOTCH1;CTBP2;TGFA;FOXO4;SDCBP;TMEM127;NACC2;S100A11;LYN;SRPK2;CD164;JUN;VDR;TNK2;INSR;TNK1;TNFSF13;FN1;FUZ;PPBP;BMX;BST1;CDK6;BCL6;CCPG1;FES;IL7;ACER3;GRB2;COPS9;MXD4;ACVRL1;BTG3;TENM1;SLC35F6;CDKN1A;RARG;BTG1;CXCL8;FLT3;FLT4;HMGB2;TCIRG1;GLI1;PKD2;AREG;CXCL5;TNFSF13B;ING4;CTSH;JAK2;JAK3…	.	NF-kappa B signaling pathway	26/104	0.000124942	0.000863485	0	0	2.53146	22.7519	CXCL8;LY96;TNFSF13B;IKBKB;IRAK1;PLAU;RIPK1;CD14;LBP;LYN;CARD10;GADD45B;TNFSF14;IL1R1;GADD45A;IRAK4;TIRAP;GADD45G;TNFRSF1A;NFKBIA;IL1B;LTBR;CARD14;TLR4;MYD88;BCL2L1
	apoptotic process (GO:0006915)	51/231	5.17787e-06	0.000496846	0	0	2.16261	26.3214	HIP1;ITGB2;DDX41;BBC3;ING4;PYCARD;STK11;CASP7;CASP3;CASP4;CASP1;TSPO;CAPN3;JAK2;ZNF385A;IER3;PRKCD;KREMEN1;ADORA2A;IL1B;IRF1;VDAC1;RAF1;GAPDH;TLR2;PPARD;PPP1R15A;STK3;PTK2B;RIPK1;CD14;FADD;NLRP1;EGLN3;TNFSF14;GADD45A;BIK;TNFSF12;BNIP3;SIAH1;CDK11B;CIDEC;NFKBIA;DLC1;IL2RA;TNFSF9;FAS;PTPN6;MYD88;BCL2L1;BNIPL	.	Toll-like receptor signaling pathway	26/104	0.000124942	0.000863485	0	0	2.53146	22.7519	CXCL8;LY96;PIK3CD;IKBKB;IRAK1;CTSK;IL12B;MAPK1;RIPK1;CD14;FADD;LBP;RAC1;IFNAR2;MAP2K4;JUN;MAP2K2;IRAK4;MAPK14;TIRAP;MAPK13;NFKBIA;IL1B;TLR4;MYD88;TLR2
	positive regulation of inflammatory response (GO:0050729)	23/73	5.49233e-06	0.000515563	0	0	3.49445	42.3254	PTGER4;SERPINE1;IL18;OSM;LPL;MGST2;NOD2;TNFRSF1A;MAPK13;VAMP8;NFKBIA;NLRP12;TNIP1;IL23A;IL12B;S100A12;LBP;S100A9;TLR4;S100A8;CCL16;MYD88;TLR2	.	Adherens junction	20/71	0.000129526	0.000875708	0	0	2.97505	26.6316	PTPN1;TCF7L2;SRC;ACTN1;INSR;CTNND1;WAS;ACTN4;BAIAP2;ACTB;RHOA;PARD3;CTNNA1;SNAI1;MAPK1;CTNNA3;PTPN6;RAC1;WASF2;NECTIN2
	endocytosis (GO:0006897)	56/263	5.88378e-06	0.000540557	0	0	2.06622	24.8841	SCARB1;ZFYVE9;AP2A1;SNX10;VLDLR;CXCL16;RINL;DNER;STAB1;TOM1;CD36;RAC1;SCARF1;HSP90AA1;ANXA1;ANXA3;SLC11A1;RHOG;ANXA11;CSNK1E;DNM2;DNM3;ADORA2A;CD302;STEAP2;RHOQ;RAB7A;RAB1A;LRP1;WAS;SNX33;CORO1A;HSPH1;MYO6;MAPK1;PIP5K1C;CD14;FCGR1A;LDLR;ATP9A;CD163;SORT1;HIP1R;MERTK;SORL1;IGF2R;EHD1;MARCO;SNX18;NECAP2;DLC1;PPT1;HYOU1;FCGR2B;FOLR2;PICALM	.	Non-small cell lung cancer	20/72	0.000159836	0.00105764	0	0	2.91767	25.5044	RET;STAT5A;STAT5B;CDKN1A;MAP2K2;GADD45B;GADD45A;STAT3;PIK3CD;TGFA;DDB2;GADD45G;RXRA;CDK6;E2F2;MAPK1;E2F3;GRB2;RAF1;JAK3
	regulation of endocytosis (GO:0030100)	22/69	7.03315e-06	0.000632691	0	0	3.55494	42.179	SCARB1;CD63;LRPAP1;PTPN1;HIP1;RAB5C;CD151;LRP1;SRC;HIP1R;SNX33;FGR;RAB21;LGALS3;HCK;RAB20;OPHN1;FLOT1;BMP2K;AP2S1;LDLR;PICALM	.	Thyroid cancer	13/37	0.000175422	0.00113659	0	0	4.10322	35.4859	RET;TCF7L2;CDKN1A;MAP2K2;GADD45B;GADD45A;DDB2;GADD45G;RXRA;TFG;PAX8;MAPK1;PPARG
	regulation of I-kappaB kinase/NF-kappaB signaling (GO:0043122)	46/204	8.21683e-06	0.000724087	0	0	2.22014	25.9964	ECM1;NLRX1;PELI2;NOD1;NOD2;LITAF;TANK;IKBKB;PYCARD;TFG;IRAK1;UBC;CASP1;S100A12;HMOX1;CAPN3;RIPK1;LGALS9;FADD;NLRP1;WLS;MAP3K3;RIOK3;PLK2;NEK6;CARD9;SHISA5;IRAK4;RHOA;TIRAP;TNFRSF1A;NFKBIA;NLRP12;PINK1;TNIP1;TNIP2;IL1B;CARD19;TNIP3;BCL3;S100A4;RBCK1;LTBR;OPTN;MYD88;LTF	.	TNF signaling pathway	27/112	0.000179884	0.00114171	0	0	2.41242	20.8027	CEBPB;PIK3CD;NOD2;CXCL5;IKBKB;SOCS3;CASP7;CASP3;MAPK1;RIPK1;FADD;JUNB;MAP2K4;JUN;TNFRSF1B;MAPK14;SELE;MMP9;TNFRSF1A;MAPK13;NFKBIA;IL1B;IRF1;BCL3;FAS;IL18R1;CREB5
	regulation of defense response (GO:0031347)	23/75	9.10682e-06	0.000786465	0	0	3.35967	38.9939	SEMA7A;ANXA1;NLRX1;NOD1;NOD2;SELE;TIRAP;FGR;HCK;ACE2;PSMA6;BST1;SBNO2;NLRP12;BCL6;IRF1;CASP4;CASP1;NLRP1;GGT1;JAK2;FCGR2B;MYD88	.	Th17 cell differentiation	26/107	0.000205046	0.00127539	0	0	2.43729	20.6981	IL1RAP;IKBKB;RXRA;IL21R;MAPK1;JAK2;IL6R;JAK3;STAT5A;STAT5B;JUN;HSP90AA1;IL4R;IL1R1;IFNGR1;IFNGR2;STAT3;TYK2;MAPK14;MAPK13;NFKBIA;IL23A;IL1B;IL2RA;RARA;NFKBIE
	regulation of interleukin-6 production (GO:0032675)	16/42	9.85216e-06	0.000834149	0	0	4.66713	53.8018	IL10;ORM1;GBA;CYBA;NOD2;MAPK13;PYCARD;IL1B;MAPKAPK2;BPI;LBP;RAB7B;IL6R;TLR4;MYD88;TLR2	.	Fc epsilon RI signaling pathway	19/68	0.00021255	0.00127704	0	0	2.94073	24.8678	LYN;MAP2K4;PLA2G4F;FCER1G;MAP2K2;PIK3CD;PLA2G4A;GAB2;MAPK14;VAV1;MAPK13;ALOX5;INPP5D;ALOX5AP;MAPK1;LCP2;GRB2;RAC1;RAF1
	positive regulation of apoptotic signaling pathway (GO:2001235)	23/76	1.16245e-05	0.000965283	0	0	3.29609	37.4515	GSK3A;GSN;BIK;BNIP3;TNFSF12;SIAH1;PLAUR;HIP1R;MMP9;TANK;BBC3;DEDD2;PYCARD;PINK1;CTSH;FAS;RIPK1;LGALS9;FADD;LTBR;S100A9;S100A8;BCL2L1	.	Human immunodeficiency virus 1 infection	43/212	0.000213525	0.00127704	0	0	1.93652	16.367	PXN;PIK3CD;CALML4;CRKL;GNAI2;IKBKB;GNG10;PAK1;GNG2;IRAK1;GNG5;GNG4;CASP3;GNA11;GNG7;CFL1;AP1S2;MAPK1;PTK2B;RIPK1;FADD;ELOC;RAC1;BTRC;AP1M2;JUN;MAP2K2;LIMK2;IRAK4;TNFRSF1B;MAPK14;GNG11;TNFRSF1A;MAPK13;NFKBIA;GNB2;FAS;RAF1;CALM2;TLR4;MYD88;TLR2;BCL2L1
	negative regulation of intrinsic apoptotic signaling pathway (GO:2001243)	20/62	1.49521e-05	0.00119562	0	0	3.61441	40.1585	CDKN2D;SRC;PLAUR;ENO1;NOL3;SOD2;CLU;MMP9;HERPUD1;PINK1;MAPK7;VNN1;SNAI1;TMBIM6;HYOU1;BCL2L2;TPT1;MCL1;NFE2L2;BCL2L1	.	Amoebiasis	25/102	0.00023324	0.00136256	0	0	2.46478	20.6141	RAB5C;CXCL8;ITGB2;PIK3CD;LAMC1;C8G;CASP3;GNA11;IL12B;CD14;IL10;SERPINB4;ARG2;IL1R1;ACTN1;IL1R2;FN1;ACTN4;GNAL;IL1B;PLCB1;RAB7B;TLR4;RAB7A;TLR2
	stress-activated MAPK cascade (GO:0051403)	20/62	1.49521e-05	0.00119562	0	0	3.61441	40.1585	PTGER4;MAP2K4;NOD1;NOD2;MAPK14;CRKL;MAPK13;IKBKB;ZFP36;IRAK1;ADORA2B;IRAK2;TNIP2;UBC;MAP3K20;MAPK1;LGALS9;BTRC;TRIB1;MAP3K11	.	Complement and coagulation cascades	22/85	0.000236586	0.00136256	0	0	2.64969	22.1228	CFD;VWF;SERPINC1;ITGB2;SERPINE1;C5AR1;CFI;PLAUR;F13A1;F2;TFPI;CLU;PROCR;C8G;C7;PLAU;ITGAX;CD59;VSIG4;CFB;CD55;F2RL3
	positive regulation of cell migration (GO:0030335)	48/221	1.53116e-05	0.0012021	0	0	2.11583	23.458	RET;CSF1R;DOCK5;CEMIP;SEMA7A;NOTCH1;CD151;SEMA3C;SRC;PIK3CD;ACVR1B;THBS1;PPM1F;MYLK;CXCL16;SDCBP;PAK1;RAB25;HYAL1;GLIPR2;PLAU;HMCN2;ENPP2;CTSH;PTK2B;STX4;WASHC1;ACVR1;CCR1;CARMIL1;SEMA4A;SEMA4D;INSR;SPHK1;FN1;ACTN4;SOD2;MMP9;RAB11A;FGR;SHTN1;IL1B;SNAI1;NUMB;ROR2;LGR6;DOCK1;FERMT3	.	Focal adhesion	41/201	0.000261051	0.00147613	0	0	1.94962	16.0859	SRC;FLT4;ITGB3;ITGA2B;PXN;PIK3CD;LAMC1;THBS2;THBS1;ACTB;MYL12A;CRKL;MYLK;MYL12B;PAK1;CCND3;CAPN2;MAPK1;PIP5K1B;ITGB7;PIP5K1C;RAC1;VASP;JUN;VWF;ACTN1;ITGA2;FN1;ACTN4;PARVB;RHOA;VAV1;PARVG;ZYX;COL6A3;GRB2;TLN1;RAF1;MYL9;DOCK1;ITGA9
	cellular response to oxidative stress (GO:0034599)	30/115	1.62482e-05	0.00124459	0	0	2.68394	29.5972	NCF1;NCF2;NCF4;MPV17L;PXN;PRR5L;PKD2;PRDX5;ALDH3B1;SESN2;HMOX1;MAPK1;ROMO1;ANKRD2;SLC25A24;G6PD;JUN;GPX1;BRF2;GPX3;TPM1;PRKCD;GSR;CYBA;SOD2;MMP9;ETV5;PINK1;P4HB;NFE2L2	.	Cytokine-cytokine receptor interaction	55/295	0.000310636	0.00172514	0	0	1.74622	14.104	ACVRL1;IL1RN;CXCL8;MPL;IL27;IL1RAP;CXCL5;CXCL16;TNFSF13B;IL18RAP;IL12B;IL6R;IL13RA1;ACVR1;IL10;IFNAR2;IL15RA;IL4R;IL1R1;IFNGR1;IL1R2;IFNGR2;IL18;IL17RE;TNFRSF1B;IL17RC;IL17RA;TNFRSF1A;IL23A;IL1B;IL3RA;CCL14;CSF1R;CSF2RB;ACVR1B;CXCR1;CXCR2;IL21R;RELT;CCL16;CCR1;TNFSF14;IL10RB;TNFSF12;IL10RA;TNFSF13;OSM;PPBP;ACVR2B;IL7;IL2RA;TNFSF9;FAS;LTBR;IL18R1
	negative regulation of intracellular signal transduction (GO:1902532)	38/161	1.64293e-05	0.00124459	0	0	2.35242	25.9153	GSK3A;NLRX1;SRC;PLEK;ADIPOR1;TANK;THBS1;ARHGAP12;HERPUD1;PYCARD;ADGRG3;PREX1;SPRED1;DEPTOR;TMEM127;WWC3;RIPK1;NLRP1;XDH;PHLDA3;MCL1;LYN;UBE2B;DUSP1;RIOK3;PLAUR;ARHGAP25;MMP9;PINK1;NLRP12;TNIP1;CARD19;DDIT3;TNIP3;DDIT4;TBC1D7;BCL2L2;BCL2L1	.	Rap1 signaling pathway	42/210	0.000343257	0.00187286	0	0	1.90202	15.1725	CSF1R;DOCK4;RALB;RGS14;SRC;FLT4;ITGB3;CTNND1;ITGA2B;ITGB2;PIK3CD;CALML4;SIPA1L2;PRKCZ;THBS1;ACTB;ADCY6;RAP1GAP;CRKL;GNAI2;MAPK1;RAC1;VASP;MAP2K2;INSR;ARAP3;MAPK14;RHOA;VAV1;MAPK13;APBB1IP;ADORA2A;ADORA2B;PARD3;ID1;LCP2;TLN1;PLCB1;RAF1;CALM2;SIPA1;F2RL3
	positive regulation of interleukin-8 production (GO:0032757)	16/44	1.96107e-05	0.00145999	0	0	4.33327	46.9702	FCN1;SERPINE1;NOD2;TIRAP;PYCARD;IL1B;DDIT3;FFAR2;RIPK1;LBP;FADD;CD14;LGALS9;TLR4;CD244;TLR2	.	Rheumatoid arthritis	23/93	0.000354468	0.00190068	0	0	2.4932	19.8082	ATP6V0B;JUN;CXCL8;ATP6V0E1;ATP6AP1;ITGB2;TNFSF13;IL18;TCIRG1;CXCL5;TNFSF13B;IL23A;CTSK;IL1B;ATP6V1B2;ATP6V1E1;ATP6V0D1;TLR4;ATP6V1D;ATP6V1C1;TLR2;ATP6V0A1;ATP6V1F
	phagosome acidification (GO:0090383)	44557	2.0531e-05	0.00150259	0	0	6.06063	65.4158	ATP6V0B;RAB20;ATP6V0E1;ATP6V1B2;TCIRG1;ATP6V1E1;ATP6V0D1;ATP6V1D;ATP6V1C1;ATP6V1F;ATP6V0A1;RAB7A	.	Hematopoietic cell lineage	24/99	0.000367026	0.00193466	0	0	2.42852	19.2098	CSF1R;IL4R;IL1R1;FLT3;IL1R2;ITGB3;ITGA2;ITGA2B;GP1BA;GP5;GP9;IL7;IL1B;IL2RA;IL3RA;CD9;CD59;CD14;CD36;CD24;FCGR1A;IL6R;CD44;CD55
	positive regulation of I-kappaB kinase/NF-kappaB signaling (GO:0043123)	38/163	2.21077e-05	0.00159102	0	0	2.31452	24.8107	ECM1;PELI2;NOD1;NOD2;LITAF;IKBKB;TFG;IRAK1;UBC;CASP1;IL12B;S100A12;HMOX1;RIPK1;LGALS9;FADD;WLS;MAP3K3;NEK6;PLK2;SPHK1;CARD9;SHISA5;IRAK4;TIRAP;RHOA;TNFRSF1A;PINK1;IL23A;TNIP2;IL1B;S100A4;RBCK1;LTBR;TLR4;MYD88;TLR2;LTF	.	Neurotrophin signaling pathway	27/119	0.00050963	0.00264158	0	0	2.22797	16.8921	ZNF274;PIK3CD;CALML4;PSEN1;CRKL;IKBKB;MAPK7;IRAK1;IRAK2;RPS6KA1;MAPK1;RAC1;MAP3K3;JUN;MAP2K2;SORT1;PRKCD;IRAK4;MAPK14;RHOA;MAPK13;NFKBIA;MAPKAPK2;GRB2;RAF1;NFKBIE;CALM2
	cellular protein localization (GO:0034613)	64/327	2.33091e-05	0.00162949	0	0	1.85913	19.8308	FCN1;ZFYVE9;KDELR1;RAB3D;AP2A1;WDR45;RAB43;RAB44;SH3PXD2B;TMED3;CAPN3;TBC1D22A;WLS;TBC1D10B;USP4;ATG9A;TBC1D8;TBC1D9;WIPI1;RAB32;TBC1D2;RAB31;TMEM33;HGS;RABL3;KDELR2;RAB7B;RAB7A;CD63;RAB1A;TBC1D9B;RAB5C;STX17;RAB1B;VPS26A;STX11;RAB21;GGA1;RAB20;RAB25;NACC2;EPB41L3;MYO6;RAB24;STX6;STX5;TBC1D14;DMD;STX4;STX3;TBC1D12;STX2;CNTLN;SMURF1;RAB27B;RAB11A;EHD1;ID1;SNX15;RAB13;RAB18;LAMTOR2;LAMTOR1;LAMTOR3	.	Collecting duct acid secretion	10/27	0.000605833	0.00308875	0	0	4.45202	32.9846	ATP6V0E1;ATP6V1B2;TCIRG1;ATP6V1E1;ATP6V0D1;ATP6V1D;SLC12A7;ATP6V1C1;ATP6V0A1;ATP6V1F
	activation of cysteine-type endopeptidase activity involved in apoptotic process (GO:0006919)	23/79	2.33971e-05	0.00162949	0	0	3.11898	33.2574	EGLN3;HIP1;HIP1R;NOD1;NLRC4;TANK;BBC3;PYCARD;CASP7;NLRP12;CASP3;DLC1;CASP4;CASP1;FAS;PPARG;RIPK1;FADD;NLRP1;JAK2;S100A9;XDH;S100A8	.	Mitophagy	18/68	0.000632727	0.00317384	0	0	2.7289	20.0997	BNIP3L;GABARAPL2;BECN1;GABARAPL1;JUN;CITED2;SRC;BNIP3;ATG9A;TFE3;GABARAP;PINK1;UBC;ULK1;RAB7B;OPTN;RAB7A;BCL2L1
	regulation of small GTPase mediated signal transduction (GO:0051056)	34/140	2.3856e-05	0.00163508	0	0	2.44049	25.9753	ARHGAP9;GDI1;SRC;ITSN1;FGD1;ARHGAP12;ARHGAP22;FGD3;PREX1;ARHGAP21;OPHN1;CHN2;RAC1;SRGAP2;SRGAP1;ARHGEF11;RHOG;ARAP3;OCRL;ARHGAP28;MYO9B;ARAP1;ARHGAP26;GMIP;ARHGAP25;RHOA;VAV1;ARHGAP45;TIAM2;ARHGAP30;DLC1;TRIP10;RHOQ;ARHGEF5	.	Transcriptional misregulation in cancer	38/192	0.000787883	0.00388939	0	0	1.87556	13.4031	CSF1R;DDX5;CDKN1A;CEBPB;SPI1;CXCL8;MAX;FLT3;CEBPE;RXRA;PLAU;TSPAN7;NFKBIZ;H3C12;ITGB7;CD14;FCGR1A;H3-3B;SMAD1;GADD45B;GADD45A;IL1R2;TFE3;MMP9;ETV5;GADD45G;DDB2;ETV6;MEIS1;BCL6;PAX8;DDIT3;BMP2K;RARA;PPARG;ERG;NUPR1;BCL2L1
	positive regulation of defense response (GO:0031349)	22/74	2.43937e-05	0.00164581	0	0	3.21221	34.1175	PTGER4;RIOK3;SERPINE1;IL18;LPL;MGST2;CYBA;TNFRSF1A;EREG;MAPK13;NFKBIA;NLRP12;TNIP1;IL23A;IL12B;S100A12;S100A9;TLR4;OPTN;S100A8;CCL16;TLR2	.	mTOR signaling pathway	32/154	0.00084445	0.0041035	0	0	1.99215	14.0981	PIK3CD;SLC3A2;IKBKB;STK11;DEPTOR;RPS6KA1;SESN2;GRB10;EIF4EBP1;MAPK1;ATP6V1E1;ATP6V1D;ATP6V1C1;ATP6V1F;MAP2K2;FZD4;INSR;RHOA;TNFRSF1A;DDIT4;TBC1D7;ATP6V1B2;ULK1;GRB2;LAMTOR2;LAMTOR1;RAF1;SGK1;LAMTOR3;LPIN2;LPIN3;LAMTOR5
	actin polymerization or depolymerization (GO:0008154)	14/36	2.68648e-05	0.00178465	0	0	4.82318	50.7625	CAP1;GSN;WDR1;TWF2;WAS;DSTN;PREX1;CATIP;MICAL1;CFL1;RAC1;CORO7;JAK2;MSRB1	.	Phospholipase D signaling pathway	31/148	0.000878187	0.00420179	0	0	2.01207	14.1602	DGKG;ARF1;DGKD;CXCL8;RALB;PIK3CD;ADCY6;PIK3R5;CYTH4;CXCR1;CXCR2;MAPK1;PTK2B;PIP5K1B;PIP5K1C;PLA2G4F;MAP2K2;FCER1G;SPHK2;INSR;SPHK1;PLA2G4A;GAB2;F2;DGKZ;RHOA;DNM2;DNM3;GRB2;RAF1;PLCB1
	cellular response to lipopolysaccharide (GO:0071222)	25/91	3.14326e-05	0.00205645	0	0	2.87738	29.8317	CXCL8;SERPINE1;HMGB2;PYCARD;ZFP36;SBNO2;IRAK1;CASP1;LBP;CD14;IL10;LYN;VDR;IL18;ACOD1;NR1H3;TNFRSF1B;MAPK14;RHOA;HCK;TNIP1;TNIP2;IL1B;TNIP3;TLR4	.	Non-alcoholic fatty liver disease	32/155	0.000946998	0.00446237	0	0	1.97584	13.7562	NDUFB9;GSK3A;CXCL8;NDUFB7;PIK3CD;PRKAG2;NDUFB1;COX7A2;ADIPOR1;IKBKB;SOCS3;CASP7;RXRA;CASP3;NDUFV3;RAC1;IL6R;MLXIP;JUN;INSR;NDUFA2;NR1H3;MAPK14;COX6B1;TNFRSF1A;MAPK13;DDIT3;IL1B;UQCRC1;FAS;PPARG;MAP3K11
	regulation of phagocytosis (GO:0050764)	15/41	3.26917e-05	0.00210691	0	0	4.37355	45.1718	SCARB1;FCER1G;SLC11A1;ABCA7;CYBA;MERTK;SIRPB1;PYCARD;SNX3;FGR;HCK;IL1B;SIRPA;FCGR2B;TLR2	.	IL-17 signaling pathway	22/94	0.00104804	0.00486476	0	0	2.31729	15.8986	HSP90AA1;CEBPB;JUN;CXCL8;IL17RE;MAPK14;IL17RC;MMP9;CXCL5;IL17RA;MAPK13;IKBKB;NFKBIA;MAPK7;CASP3;IL1B;LCN2;MAPK1;FADD;DEFB4A;S100A9;S100A8
	endosomal transport (GO:0016197)	48/229	4.02845e-05	0.00255807	0	0	2.02139	20.4556	TMEM87A;BECN1;SYS1;ZFYVE9;VPS26A;AP2A1;DENND3;SNX33;LAPTM4B;UBC;STX6;TOM1;ANKFY1;STX5;DENND5A;WASHC1;RILP;VPS39;TBC1D10B;VTI1B;SORT1;AKTIP;DENND2A;VPS37C;ZFYVE21;LMTK2;VPS37B;AP5B1;EHD1;EHD2;FAM160A2;SNX18;EHD4;HGS;MYO5B;VPS41;RAB13;CHMP2A;UBAP1;CHMP4B;CHMP3;CORO7;LAMTOR1;TBC1D23;RAB7B;RAB7A;PICALM;CHMP5	.	PD-L1 expression and PD-1 checkpoint pathway in cancer	21/89	0.00120675	0.00551909	0	0	2.3416	15.7352	MAP3K3;BATF3;JUN;MAP2K2;IFNGR1;IFNGR2;STAT3;PIK3CD;MAPK14;TIRAP;MAPK13;IKBKB;NFKBIA;MAPK1;PTPN6;JAK2;RAF1;NFKBIE;TLR4;MYD88;TLR2
	intracellular pH reduction (GO:0051452)	13/33	4.42983e-05	0.00277218	0	0	4.92498	49.3708	ATP6V0B;ATP6V0E1;SLC11A1;TCIRG1;RAB20;ATP6V1B2;ATP6V1E1;ATP6V0D1;ATP6V1D;ATP6V1C1;ATP6V1F;ATP6V0A1;RAB7A	.	Arginine and proline metabolism	14/50	0.00136638	0.00604176	0	0	2.94516	19.4251	ARG2;MAOA;SMOX;HOGA1;SAT1;CNDP2;GATM;ALDH2;P4HA1;P4HA2;SMS;CKB;PRODH;ALDH9A1
	ephrin receptor signaling pathway (GO:0048013)	23/82	4.49859e-05	0.00277499	0	0	2.95989	29.626	ACTR3;LYN;SRC;ARPC1B;ITSN1;AP2A1;ARPC4;PSEN1;ARPC5;AP2A2;MMP9;ACTB;RHOA;MYL12A;APH1A;EFNB1;SDCBP;PAK1;ARPC3;AP2S1;RAC1;ANKS1A;CDK5R1	.	Malaria	14/50	0.00136638	0.00604176	0	0	2.94516	19.4251	IL10;CXCL8;LRP1;ITGB2;IL18;THBS2;THBS1;SELE;SELP;IL1B;CD36;TLR4;MYD88;TLR2
	MyD88-dependent toll-like receptor signaling pathway (GO:0002755)	12/29	4.89539e-05	0.00294631	0	0	5.34701	53.0671	IRAK1;TNIP1;IRAK2;UBC;LY96;CD14;CD36;IRAK4;TLR4;TIRAP;MYD88;TLR2	.	Glycerolipid metabolism	16/61	0.00137931	0.00604176	0	0	2.69366	17.7409	DGKG;DGKD;DGAT2;GK;AGK;GLYCTK;LPL;DGKZ;PLPP5;ALDH2;GPAT4;GPAT3;LPIN2;LPIN3;ALDH9A1;PNPLA2
	cellular response to insulin stimulus (GO:0032869)	28/110	4.9543e-05	0.00294631	0	0	2.59486	25.722	HDAC5;GSK3A;FOXO4;TCIRG1;PDK4;ATP6V1E1;ATP6V1D;ATP6V1C1;ATP6V1F;ATP6V0A1;ATP6V0B;ATP6V0E1;ATP6AP1;INSR;BAIAP2;USF1;KAT2B;RAB31;PKM;CAPN10;RAB13;ATP6V1B2;GRB2;PPARG;ATP6V0D1;SLC25A33;RHOQ;PTPN2	.	Proteoglycans in cancer	39/205	0.00147483	0.00637046	0	0	1.78532	11.6389	CD63;CDKN1A;DDX5;SDC4;SRC;ITGB3;PXN;HSPB2;PIK3CD;THBS1;ACTB;PAK1;PLAU;GPC1;CASP3;GPC3;IL12B;MAPK1;RAC1;MAP2K2;FZD4;ITGA2;STAT3;FN1;PLAUR;MIR21;MAPK14;MMP9;RHOA;VAV1;MAPK13;HCLS1;FAS;GRB2;PTPN6;RAF1;TLR4;CD44;TLR2
	organonitrogen compound biosynthetic process (GO:1901566)	40/181	5.026e-05	0.00294631	0	0	2.15978	21.3781	MOCS2;SGMS1;MGST1;MGST2;NOD1;FURIN;HACD2;GPHN;GPAT4;ALDH3B1;ST3GAL4;DMD;SPTSSA;LARGE1;GLUL;GSTM3;ARG2;CERS6;GCH1;SPHK2;GPT2;SPHK1;MOCOS;IL18;ACOD1;PLA2G4A;NMRAL1;ASS1;SGPP1;PHOSPHO1;TNIP1;ACER3;LPCAT2;PPARG;NAGS;CDO1;MOCS1;LPIN2;LPIN3;CERS2	.	MAPK signaling pathway	52/294	0.00153462	0.00652458	0	0	1.63499	10.5939	PTPRR;FLT3;FLT4;IL1RAP;AREG;CRKL;IKBKB;CASP3;RPS6KA1;RAC1;MAP3K6;MAP2K4;PLA2G4F;MAP2K2;IL1R1;DUSP1;PLA2G4A;CACNA2D4;IRAK4;EREG;TNFRSF1A;MAPKAPK3;DDIT3;IL1B;MAPKAPK2;RAF1;CSF1R;MAX;TGFA;RASGRP4;STK3;PAK1;MAPK7;IRAK1;MKNK1;MAP3K20;MAPK1;CD14;MAP3K3;JUN;GADD45B;GADD45A;INSR;MAPK14;GADD45G;MAPK13;FAS;GRB2;LAMTOR3;PTPN5;MAP3K11;MYD88
	positive regulation of nitric oxide biosynthetic process (GO:0045429)	11/25	5.11749e-05	0.00294631	0	0	5.95018	58.7894	HSP90AA1;P2RX4;DDAH2;INSR;IL1B;CD36;PKD2;KLF4;CLU;TLR4;ASS1	.	Pentose phosphate pathway	10/30	0.00155247	0.00652458	0	0	3.78357	24.4718	GPI;G6PD;GLYCTK;TALDO1;ALDOC;PGD;ALDOA;TKT;RBKS;DERA
	positive regulation of nitric oxide metabolic process (GO:1904407)	11/25	5.11749e-05	0.00294631	0	0	5.95018	58.7894	HSP90AA1;P2RX4;DDAH2;INSR;IL1B;CD36;PKD2;KLF4;CLU;TLR4;ASS1	.	Colorectal cancer	20/86	0.0018808	0.00779906	0	0	2.29695	14.4158	TCF7L2;CDKN1A;JUN;MAP2K2;RALB;GADD45B;GADD45A;PIK3CD;TGFA;AREG;RHOA;BBC3;DDB2;EREG;GADD45G;CASP3;MAPK1;GRB2;RAC1;RAF1
	regulation of macroautophagy (GO:0016241)	29/116	5.23587e-05	0.0029748	0	0	2.53345	24.9732	MTMR3;RAB1B;GBA;PRKAG2;VPS26A;CAPNS1;CASP3;SESN2;TBC1D14;CAPN1;TBC1D12;ATP6V1E1;ATP6V1D;ATP6V1C1;ATP6V0A1;BNIP3L;ATP6V0B;ATP6V0E1;BNIP3;PINK1;ATP6V1B2;ULK1;LAMTOR2;LAMTOR1;ATP6V0D1;GAPDH;LAMTOR3;CDK5R1;LAMTOR5	.	Central carbon metabolism in cancer	17/70	0.00245414	0.0100426	0	0	2.42995	14.604	RET;G6PD;MAP2K2;FLT3;PGAM1;IDH1;PIK3CD;SIRT6;SLC1A5;HK1;HK3;LDHB;LDHA;PKM;MAPK1;RAF1;SLC16A3
	negative regulation of signal transduction (GO:0009968)	56/283	5.35816e-05	0.00300474	0	0	1.88202	18.5083	RET;GSK3A;CXCL8;FLT3;FLT4;PLEK;MED12;RGS2;SMPD1;GRB10;BTRC;ACVR1;CISH;ARRDC1;PRKCD;LMTK2;NRG1;RPGRIP1L;EREG;EPN2;HGS;IL1B;DDIT4;TMBIM1;TAX1BP3;TMBIM6;ROR2;TRIB1;RAF1;SMPDL3B;LTF;LRPAP1;CSF1R;NOTCH3;LRP1;GBA;PRKCZ;THBS1;SOCS3;KCTD21;GPC1;UBC;XDH;LYN;PTPN1;MPIG6B;INSR;WWP2;MERTK;ASXL1;PTPRE;NLRP12;NEURL1;SPRY1;PTPN2;LGMN	.	Endocrine and other factor-regulated calcium reabsorption	14/53	0.00250244	0.0101073	0	0	2.71815	16.283	KLK1;VDR;CLTB;CLTA;AP2A1;ATP1B3;AP2A2;SLC8A1;ADCY6;RAB11A;DNM2;DNM3;AP2S1;PLCB1
	receptor-mediated endocytosis (GO:0006898)	41/188	5.60844e-05	0.00309343	0	0	2.12361	20.7873	SCARB1;RAMP2;CXCL8;RAMP3;LRP1;ITGB2;CLTB;CLTA;AP2A1;VLDLR;AP2A2;CXCL16;HSPH1;GRK2;CXCR1;STAB1;CXCR2;AP2S1;PIP5K1C;CD36;FCGR1A;SCARF1;LDLR;CD163;HSP90AA1;FCER1G;HIP1R;SORL1;IGF2R;DNM2;DNM3;MARCO;RAB31;DLC1;PPT1;CD9;HYOU1;GRB2;FCGR2B;FOLR2;PICALM	.	VEGF signaling pathway	15/59	0.00268182	0.0106929	0	0	2.58173	15.2871	PLA2G4F;MAP2K2;SPHK2;SRC;SPHK1;PXN;PIK3CD;PLA2G4A;MAPK14;MAPK13;MAPKAPK3;MAPKAPK2;MAPK1;RAC1;RAF1
	positive regulation of NF-kappaB transcription factor activity (GO:0051092)	31/128	5.65958e-05	0.00309343	0	0	2.4297	23.7614	NOD1;NOD2;NLRC4;CLU;PRKCZ;TANK;PYCARD;IKBKB;IRAK1;IRAK2;UBC;CAPN3;S100A12;RIPK1;LGALS9;CD36;SPHK1;IRAK4;TIRAP;NFKBIA;PSMA6;IL1B;RBCK1;RAB7B;S100A9;CARD14;TLR4;S100A8;MYD88;TLR2;LTF	.	Inflammatory bowel disease	16/65	0.00280562	0.0110299	0	0	2.47321	14.5329	IL10;JUN;IL4R;IFNGR1;IFNGR2;STAT3;IL18;NOD2;IL18RAP;IL23A;IL1B;IL21R;IL12B;TLR4;IL18R1;TLR2
	negative regulation of inflammatory response (GO:0050728)	22/78	5.95877e-05	0.00321624	0	0	2.98209	29.0099	IL10;PTGER4;NLRX1;TNFAIP6;PRKCD;GBA;ACOD1;NR1H3;NOD1;NOD2;METRNL;F2;MEFV;KLF4;TNFRSF1A;NLRP12;MAPK7;PPARG;TNFAIP8L2;SMPDL3B;PTPN2;PPARD	.	Influenza A	33/172	0.00283728	0.0110299	0	0	1.80218	10.5696	NLRX1;CXCL8;PIK3CD;ACTB;PYCARD;IKBKB;SOCS3;DNAJB1;CCND3;CASP3;CASP1;IL12B;MAPK1;FADD;JAK2;IFNAR2;MAP2K2;IFNGR1;IFNGR2;STAT2;IL18;IRAK4;TYK2;RAB11A;TNFRSF1A;NFKBIA;CDK6;IL1B;FAS;VDAC1;RAF1;TLR4;MYD88
	positive regulation of cytokine production (GO:0001819)	46/220	6.14151e-05	0.00327396	0	0	2.01415	19.5329	PTGER4;CEBPB;FLT4;SERPINE1;DDX41;NOD2;PRKCZ;LY9;TANK;PYCARD;IRAK1;FLOT1;IL12B;SLAMF6;FFAR2;RIPK1;LGALS9;CD14;FADD;LBP;IL6R;IL10;ANXA1;CADM1;SLC11A1;NFAM1;IL18;CYBA;TIRAP;EREG;IL17RA;MAPK13;CCDC88B;FGR;IL23A;IL7;DDIT3;IL1B;IRF1;RARA;RAB7B;PLCB1;TLR4;GAPDH;MYD88;TLR2	.	PI3K-Akt signaling pathway	59/354	0.00322803	0.012394	0	0	1.52182	8.729	CDKN1A;FLT3;FLT4;ITGB3;ITGA2B;PIK3CD;LAMC1;AREG;IKBKB;GYS1;CCND3;STK11;ITGB7;RAC1;JAK2;JAK3;IL6R;IFNAR2;HSP90AA1;IL4R;MAP2K2;VWF;ITGA2;PPP2R5A;EREG;DDIT4;IL3RA;COL6A3;SGK1;RAF1;TLR4;TLR2;CREB5;ITGA9;CSF1R;TGFA;THBS2;THBS1;PIK3R5;GNG10;RXRA;GNG2;GNG5;GNG4;PPP2R3C;GNG7;EIF4EBP1;MAPK1;MCL1;INSR;FN1;OSM;GNG11;CDK6;IL7;GNB2;IL2RA;GRB2;BCL2L1
	positive regulation of interleukin-6 production (GO:0032755)	15/43	6.21953e-05	0.00327511	0	0	4.0607	39.3288	CYBA;NOD2;TIRAP;EREG;MAPK13;PYCARD;IL1B;MBP;LBP;LGALS9;RAB7B;IL6R;TLR4;MYD88;TLR2	.	Sulfur metabolism	5/10	0.00331622	0.0125774	0	0	7.55736	43.1445	SELENBP1;ETHE1;SQOR;PAPSS2;PAPSS1
	regulation of interleukin-8 production (GO:0032677)	13/34	6.4068e-05	0.00333308	0	0	4.69019	45.2864	IL10;C5AR2;SERPINE1;NOD2;TIRAP;IL1B;DDIT3;RIPK1;BPI;LBP;FADD;TLR4;TLR2	.	SNARE interactions in vesicular transport	10/33	0.00344615	0.0129127	0	0	3.2895	18.6531	VAMP8;STX17;STX6;STX5;STX4;STX3;STX2;STX11;VTI1B;BET1
	cellular response to molecule of bacterial origin (GO:0071219)	23/84	6.79464e-05	0.00349277	0	0	2.86252	27.471	IL10;CXCL8;VDR;SERPINE1;HMGB2;ACOD1;NR1H3;TNFRSF1B;MAPK14;RHOA;TIRAP;PYCARD;ZFP36;SBNO2;TNIP1;TNIP2;TNIP3;CASP1;LBP;CD14;FCGR2B;TLR4;TLR2	.	Epstein-Barr virus infection	37/202	0.00375346	0.0138967	0	0	1.70265	9.50941	CDKN1A;PIK3CD;IKBKB;PSMD6;CCND3;IRAK1;CASP3;E2F2;RIPK1;E2F3;FADD;RAC1;JAK3;LYN;IFNAR2;MAP2K4;ENTPD1;JUN;GADD45B;GADD45A;STAT2;STAT3;TYK2;IRAK4;MAPK14;GADD45G;DDB2;SAP30;MAPK13;NFKBIA;CDK6;FAS;VIM;NFKBIE;CD44;MYD88;TLR2
	integrin-mediated signaling pathway (GO:0007229)	18/58	7.02228e-05	0.00356732	0	0	3.41307	32.642	SEMA7A;MPIG6B;SRC;ITGB3;ITGA2;ITGA2B;ITGB2;PLEK;THY1;FGR;HCK;TEC;ZYX;MYH9;PTK2B;ITGB7;DOCK1;FERMT3	.	Glycolysis / Gluconeogenesis	16/67	0.00388387	0.0142104	0	0	2.37595	13.1887	GPI;ACSS2;PGAM1;ENO1;HK1;HK3;LDHB;LDHA;PKM;ALDH2;ALDH3B1;PGK1;ALDOC;ALDOA;GAPDH;ALDH9A1
	positive regulation of reactive oxygen species biosynthetic process (GO:1903428)	12/30	7.29286e-05	0.00366169	0	0	5.04966	48.1032	HSP90AA1;P2RX4;DDAH2;INSR;IL1B;CYBA;CD36;PKD2;KLF4;CLU;TLR4;ASS1	.	Cholesterol metabolism	13/50	0.00408439	0.0147703	0	0	2.65958	14.6293	SCARB1;STARD3;LRPAP1;LRP1;SORT1;LPL;NPC1;SOAT1;NPC2;TSPO;VDAC1;CD36;LDLR
	positive regulation of protein metabolic process (GO:0051247)	25/96	8.24573e-05	0.00409254	0	0	2.67399	25.1441	RAB1A;GSK3A;LRP1;RAB1B;GBA;PSEN1;CLU;OAZ1;OAZ2;MAPK7;STX5;RILP;ATG7;EGLN2;SMURF1;PLK2;TNFSF12;NR1H3;WWP2;KLF4;SORL1;EREG;NFKBIA;HECW2;RAB7A	.	Small cell lung cancer	20/92	0.00433027	0.0154795	0	0	2.10482	11.4547	CDKN1A;CDKN2B;GADD45B;MAX;GADD45A;ITGA2;ITGA2B;FN1;PIK3CD;LAMC1;DDB2;GADD45G;IKBKB;NFKBIA;RXRA;CDK6;CASP3;E2F2;E2F3;BCL2L1
	negative regulation of cellular process (GO:0048523)	92/534	8.65268e-05	0.00421397	0	0	1.59343	14.9066	ACVRL1;CDA;BTG3;TENM1;ADAMDEC1;CDKN1A;RARG;IFITM1;BTG1;ATP8A2;CXCL8;ADARB1;ENO1;PKD2;CLU;ING4;STK11;HYAL1;FTH1;SESN2;JAK2;TNS2;IL10;BNIP3L;TESC;ACTN1;EREG;VAMP8;ST7L;KAT2B;RNF167;DCSTAMP;PSRC1;HGS;IL1B;IRF1;TXNIP;CHMP4B;MYH9;TMBIM6;ROR2;ATF5;RAF1;LRPAP1;BECN1;NOTCH1;CTBP2;NAIF1;FOXO4;PPM1D;ACVR1B;SNX3;MNT;SERTAD3;TMEM127;GNG4;NACC2;MXI1;PLXNA2;PTK2B;SLIT3;S100A11;LYN;CDKN2D;CD164;CDKN2B;SEMA4D;VD…	.	Insulin signaling pathway	27/137	0.0044686	0.0157924	0	0	1.86149	10.0719	PIK3CD;PRKAG2;CALML4;PRKCZ;CRKL;HK1;IKBKB;LIPE;SOCS3;GYS1;HK3;INPP5A;MKNK1;EIF4EBP1;FLOT1;FLOT2;MAPK1;PTPN1;MAP2K2;INSR;PHKA2;PPP1R3B;TRIP10;GRB2;RAF1;CALM2;RHOQ
	negative regulation of apoptotic process (GO:0043066)	85/485	8.68557e-05	0.00421397	0	0	1.62568	15.2022	RET;FLT3;CITED2;FLT4;SH3RF1;IKBKB;MAEA;CASP3;CFL1;CLEC5A;RPS6KA1;PIM1;PDK4;PROK2;CTSH;CAPN3;HTATIP2;IL10;BNIP3L;ANXA1;GPX1;SPHK2;ANXA4;SPHK1;PRKCD;ANXA5;PLAUR;LMTK2;WDR73;TNFRSF1B;MMP9;RNF144B;HCK;DDAH2;HCLS1;TMBIM6;ROR2;ATF5;RAF1;CRYAB;CARD14;NAIP;CD44;LTF;CSF1R;NOTCH1;SRC;ALOX12;PSEN1;NOL3;GATA1;THBS1;PRDX5;IRAK1;BAG3;UBC;PTK2B;SFN;MCL1;CDKN2D;PRELID1;SEMA4D;PLK2;INSR;BNIP3;PLK1;STAT3;MERTK;KLF…	.	Human papillomavirus infection	55/331	0.00463189	0.0161856	0	0	1.51531	8.14449	CDKN1A;ITGB3;ITGA2B;PIK3CD;LAMC1;TCIRG1;IKBKB;LFNG;CCND3;CASP3;ITGB7;ATP6V1E1;IFNAR2;ATP6V0B;ATP6V0E1;MAP2K2;ATP6AP1;VWF;ITGA2;PPP2R5A;TYK2;TNFRSF1A;PKM;PARD3;IRF1;ATP6V1B2;COL6A3;ATP6V0D1;RAF1;CREB5;ITGA9;PTGER4;NOTCH3;NOTCH1;PXN;PSEN1;THBS2;PRKCZ;THBS1;PPP2R3C;EIF4EBP1;MAPK1;FADD;ATP6V1D;ATP6V1C1;ATP6V0A1;ATP6V1F;TCF7L2;FZD4;STAT2;FN1;CDK6;TADA3;FAS;GRB2
	negative regulation of defense response (GO:0031348)	22/80	9.03671e-05	0.00433561	0	0	2.87893	26.8075	IL10;PTGER4;NLRX1;TNFAIP6;PRKCD;GBA;ACOD1;TRAFD1;NR1H3;NOD1;NOD2;METRNL;MEFV;KLF4;TNFRSF1A;NLRP12;MAPK7;PPARG;TNFAIP8L2;SMPDL3B;PTPN2;PPARD	.	GnRH signaling pathway	20/93	0.00492331	0.0170128	0	0	2.07586	11.0307	MAP2K4;MAP3K3;PLA2G4F;JUN;MAP2K2;SRC;PRKCD;PLA2G4A;CALML4;MAPK14;ADCY6;MAPK13;MAPK7;GNA11;MAPK1;PTK2B;GRB2;PLCB1;RAF1;CALM2
	Rab protein signal transduction (GO:0032482)	20/70	0.000104401	0.00475408	0	0	3.03473	27.8202	RAB1A;RAB5C;GDI1;RAB3D;RAB1B;RAB27B;RAB11A;RAB43;RAB32;RAB21;RAB44;RAB31;RAB20;RAB25;RAB24;RAB13;RABL3;RAB18;RAB7B;RAB7A	.	Glutathione metabolism	14/57	0.00512393	0.0174177	0	0	2.46474	12.9986	GGT5;GSTM3;G6PD;GPX1;GPX4;GPX3;GSS;IDH1;GSR;MGST1;MGST2;PGD;SMS;GGT1
	positive regulation of NF-kappaB import into nucleus (GO:0042346)	8/15	0.000104594	0.00475408	0	0	8.64711	79.2545	IL23A;SPHK1;IL1B;IL12B;LGALS9;TLR4;RHOA;TLR2	.	B cell receptor signaling pathway	18/81	0.00517908	0.0174177	0	0	2.1642	11.3904	LYN;IFITM1;JUN;MAP2K2;PIK3CD;DAPP1;VAV1;LILRA4;IKBKB;NFKBIA;INPP5D;MAPK1;GRB2;PTPN6;RAC1;RAF1;FCGR2B;NFKBIE
	JAK-STAT cascade involved in growth hormone signaling pathway (GO:0060397)	8/15	0.000104594	0.00475408	0	0	8.64711	79.2545	LYN;STAT5A;PTPN1;STAT5B;STAT3;MAPK1;JAK2;JAK3	.	Sphingolipid signaling pathway	24/119	0.00525447	0.0174177	0	0	1.91507	10.0516	MAP2K2;CERS6;FCER1G;SGMS1;SPHK2;SPHK1;PIK3CD;PPP2R5A;GAB2;MAPK14;PRKCZ;RHOA;SGPP1;TNFRSF1A;GNAI2;MAPK13;PPP2R3C;SMPD1;MAPK1;RAC1;RAF1;PLCB1;CTSD;CERS2
	toll-like receptor 4 signaling pathway (GO:0034142)	8/15	0.000104594	0.00475408	0	0	8.64711	79.2545	IRAK1;TNIP3;ITGB2;LY96;LBP;CD14;TLR4;TIRAP	.	Adipocytokine signaling pathway	16/69	0.00528039	0.0174177	0	0	2.28603	11.9874	CPT1A;ACSL1;STAT3;ACSL6;PRKAG2;TNFRSF1B;ADIPOR1;TNFRSF1A;IKBKB;NFKBIA;SOCS3;STK11;RXRA;CD36;JAK2;NFKBIE
	regulation of mast cell degranulation (GO:0043304)	8/15	0.000104594	0.00475408	0	0	8.64711	79.2545	LYN;FGR;CD300A;FES;STXBP2;GAB2;LGALS9;UNC13D	.	AGE-RAGE signaling pathway in diabetic complications	21/100	0.00537651	0.0174177	0	0	2.0143	10.5261	STAT5A;STAT5B;JUN;CXCL8;SERPINE1;PRKCD;STAT3;FN1;PIK3CD;MAPK14;PRKCZ;SELE;MAPK13;CASP3;IL1B;PIM1;MAPK1;RAC1;JAK2;PLCB1;PLCD1
	protein autophosphorylation (GO:0046777)	38/175	0.000113307	0.00501822	0	0	2.11034	19.1733	CSF1R;FLT3;SRC;FLT4;ACVR1B;STK11;PAK1;IRAK1;MKNK1;PIM1;PTK2B;RIPK1;JAK2;JAK3;MARK2;LYN;MAP3K3;MAP2K2;INSR;NEK6;TNK2;TNK1;ACOD1;LMTK2;TYK2;BMX;FGR;HCK;PINK1;TEC;MAPKAPK3;STK24;FES;MAPKAPK2;ULK1;ALPK3;GRB2;MAP3K11	.	Viral protein interaction with cytokine and cytokine receptor	21/100	0.00537651	0.0174177	0	0	2.0143	10.5261	CCR1;IL10;CCL14;CSF1R;CXCL8;TNFSF14;IL10RB;IL10RA;IL18;PPBP;TNFRSF1B;CXCL5;TNFRSF1A;IL18RAP;CXCR1;IL2RA;CXCR2;LTBR;IL6R;CCL16;IL18R1
	receptor internalization (GO:0031623)	16/50	0.000116778	0.00501822	0	0	3.56736	32.3033	RAMP2;CXCL8;FCER1G;RAMP3;LRP1;ITGB2;DNM2;DNM3;RAB31;GRK2;CXCR1;CXCR2;CD9;GRB2;CD36;PICALM	.	Measles	27/139	0.00547537	0.0175551	0	0	1.82804	9.5195	PIK3CD;BBC3;IKBKB;CCND3;IRAK1;CASP3;IL12B;FADD;JAK3;IFNAR2;STAT5A;STAT5B;JUN;STAT2;STAT3;IRAK4;TYK2;NFKBIA;CDK6;IL1B;IL2RA;FAS;FCGR2B;TLR4;MYD88;BCL2L1;TLR2
	macropinocytosis (GO:0044351)	5/6	0.000118541	0.00501822	0	0	37.7954	341.68	PYCARD;CARMIL1;MAPKAPK3;MAPKAPK2;SNX33	.	beta-Alanine metabolism	9/30	0.00584927	0.0185625	0	0	3.24148	16.6659	AOC3;AOC2;ALDH2;SMOX;DPYS;ALDH3B1;DPYD;CNDP2;ALDH9A1
	response to lipoteichoic acid (GO:0070391)	5/6	0.000118541	0.00501822	0	0	37.7954	341.68	LBP;CD14;MAPK14;TIRAP;TLR2	.	Pancreatic cancer	17/76	0.00604721	0.0189968	0	0	2.18209	11.1465	CDKN1A;RALB;GADD45B;GADD45A;STAT3;PIK3CD;TGFA;DDB2;GADD45G;IKBKB;CDK6;E2F2;MAPK1;E2F3;RAC1;RAF1;BCL2L1
	iron ion import across plasma membrane (GO:0098711)	5/6	0.000118541	0.00501822	0	0	37.7954	341.68	STEAP3;STEAP4;HFE;STEAP2;PICALM	.	Prolactin signaling pathway	16/70	0.0061178	0.0190264	0	0	2.24357	11.4345	STAT5A;STAT5B;MAP2K2;CISH;SRC;STAT3;PIK3CD;MAPK14;MAPK13;SOCS3;IRF1;MAPK1;GRB2;JAK2;RAF1;SOCS6
	cellular response to lipoteichoic acid (GO:0071223)	5/6	0.000118541	0.00501822	0	0	37.7954	341.68	LBP;CD14;MAPK14;TIRAP;TLR2	.	Staphylococcus aureus infection	20/95	0.0063107	0.019432	0	0	2.02028	10.2337	IL10;CFD;SELPLG;ITGB2;C5AR1;CFI;PTAFR;KRT23;KRT34;DEFB1;KRT31;FCAR;KRT33B;SELP;KRT33A;FCGR2A;DEFB4A;FCGR1A;FCGR2B;CFB
	positive regulation of amyloid-beta clearance (GO:1900223)	5/6	0.000118541	0.00501822	0	0	37.7954	341.68	LRPAP1;LRP1;ABCA7;LDLR;PICALM	.	Relaxin signaling pathway	25/129	0.00754476	0.0230041	0	0	1.82209	8.90436	SRC;PIK3CD;PRKCZ;ADCY6;GNAI2;GNG10;GNG2;GNG5;GNG4;GNG7;MAPK1;MAP2K4;JUN;MAP2K2;MAPK14;GNG11;MMP9;MAPK13;NFKBIA;ACTA2;GNB2;GRB2;RAF1;PLCB1;CREB5
	negative regulation of extrinsic apoptotic signaling pathway (GO:2001237)	21/76	0.000120185	0.00503845	0	0	2.89721	26.1516	ACVR1;TCF7L2;GPX1;SRC;EYA3;SERPINE1;NOL3;TANK;THBS1;GATA1;SH3RF1;LGALS3;MAPK7;IL1B;TMBIM1;HMOX1;FAS;RIPK1;FADD;MCL1;BCL2L1	.	Phosphatidylinositol signaling system	20/97	0.00800226	0.0241622	0	0	1.96758	9.49954	DGKG;DGKD;MTMR3;ITPK1;PIK3CD;OCRL;CALML4;DGKZ;ITPKC;INPP5A;INPP5D;PI4KA;PIP5K1B;PIP5K1C;PLCB1;CDIPT;CALM2;PI4K2A;PLCD1;CDS2
	osteoclast differentiation (GO:0030316)	9/19	0.000124745	0.00508159	0	0	6.81136	61.229	CSF1R;DCSTAMP;SBNO2;ANXA2;SRC;OCSTAMP;SNX10;GAB2;MAPK14	.	ErbB signaling pathway	18/85	0.00870846	0.0260416	0	0	2.03453	9.6507	STAT5A;MAP2K4;STAT5B;CDKN1A;JUN;MAP2K2;SRC;PIK3CD;TGFA;NRG1;AREG;CRKL;EREG;PAK1;EIF4EBP1;MAPK1;GRB2;RAF1
	leukotriene metabolic process (GO:0006691)	9/19	0.000124745	0.00508159	0	0	6.81136	61.229	GGT5;ALOX5;ALOX5AP;MAPKAPK2;MGST2;ALOX12;PTGR1;LTC4S;GGT1	.	Glycerophospholipid metabolism	20/98	0.00897624	0.0265868	0	0	1.94224	9.15414	DGKG;PLA2G4F;DGKD;MBOAT7;PLA2G4A;GPCPD1;DGKZ;PLA2G15;PGS1;PHOSPHO1;PLPP5;GPAT4;LPCAT3;LPCAT2;GPAT3;PNPLA6;CDIPT;LPIN2;LPIN3;CDS2
	regulation of heterotypic cell-cell adhesion (GO:0034114)	9/19	0.000124745	0.00508159	0	0	6.81136	61.229	IL10;IL1RN;MAPK7;IL1B;FLOT1;MBP;THY1;KLF4;CD44	.	Th1 and Th2 cell differentiation	19/92	0.00941477	0.0276226	0	0	1.97122	9.19669	STAT5A;NOTCH3;STAT5B;JUN;IL4R;NOTCH1;IFNGR1;IFNGR2;TYK2;MAPK14;MAPK13;IKBKB;NFKBIA;IL2RA;IL12B;MAPK1;JAK2;NFKBIE;JAK3
	regulation of interleukin-8 secretion (GO:2000482)	10/23	0.000127685	0.00515276	0	0	5.82319	52.2103	FCN1;PYCARD;ANXA1;ANXA4;C5AR2;FFAR2;CD14;LGALS9;CD244;TLR2	.	Histidine metabolism	7/22	0.0103519	0.0300882	0	0	3.52779	16.1241	HAL;ALDH2;MAOA;ALDH3B1;HNMT;CNDP2;ALDH9A1
	negative regulation of cytokine production (GO:0001818)	27/110	0.00013041	0.00521397	0	0	2.47083	22.1011	PTGER4;ORM1;NLRX1;PPP1R11;GBA;NLRC5;UBE2L6;GPATCH3;MEFV;THBS1;UBC;IL12B;LGALS9;RAC1;JAK3;CMKLR1;IL10;SRGN;SLC11A1;ACOD1;F2;NLRP12;IL23A;RARA;BPI;FCGR2B;TLR4	.	Serotonergic synapse	22/113	0.0110825	0.0316482	0	0	1.83148	8.24605	CYP2J2;GABRB1;PLA2G4F;MAOA;DUSP1;PLA2G4A;ALOX12;GNG11;SLC6A4;GNAI2;GNG10;HTR7;GNG2;GNG5;GNG4;GNB2;CASP3;ALOX5;GNG7;MAPK1;RAF1;PLCB1
	protein phosphorylation (GO:0006468)	82/470	0.000133897	0.00530429	0	0	1.61578	14.4103	RET;ACVRL1;GSK3A;TP53RK;FLT3;GMFG;FLT4;PIK3CD;IKBKB;LIPE;STK11;RPS6KA1;PIM1;PDK3;JAK2;MAP3K6;JAK3;ACVR1;PRKCD;ACOD1;LMTK2;CSNK1E;TYK2;PHKA2;FGR;HCK;MAPKAPK3;MAPKAPK2;RARA;BMP2K;FAM20C;ULK1;ALPK3;ERG;FAM20A;SGK1;RAF1;TLR4;TLR2;CSF1R;SRC;ACVR1B;PRKCZ;AURKC;CAMKK1;STK3;PAK1;GRK2;IRAK1;IRAK2;MKNK1;MAP3K20;STK38L;PTK2B;MAPK1;RIPK1;MARK2;LYN;SRPK2;MAP3K3;PLK2;GLYCTK;NEK6;INSR;PLK1;TNK1;CDC42BPB;BMX;MER…	.	Vascular smooth muscle contraction	25/133	0.0110921	0.0316482	0	0	1.7542	7.89657	RAMP2;RAMP3;CALML4;ADCY6;MYLK;CALD1;GNA11;MAPK1;ARHGEF11;GUCY1A1;PLA2G4F;MAP2K2;PRKCD;IRAG1;PLA2G4A;RHOA;ACTA2;MYL6;ADORA2A;ADORA2B;MYH9;RAF1;PLCB1;MYL9;CALM2
	cellular response to interleukin-12 (GO:0071349)	15/46	0.000149363	0.00575846	0	0	3.6671	32.304	IL10;ARF1;ANXA2;PITPNA;TALDO1;TYK2;SOD2;LMNB1;CNN2;CFL1;IL12B;LCP1;P4HB;JAK2;PLCB1	.	Glioma	16/75	0.0120472	0.0340606	0	0	2.05285	9.0714	CDKN1A;MAP2K2;GADD45B;GADD45A;PIK3CD;TGFA;CALML4;DDB2;GADD45G;CDK6;E2F2;MAPK1;E2F3;GRB2;RAF1;CALM2
	icosanoid metabolic process (GO:0006690)	15/46	0.000149363	0.00575846	0	0	3.6671	32.304	GGT5;CYP2J2;DAGLA;GPX1;GPX4;PLA2G4A;ALOX12;LTC4S;PTGR1;ALOX5;ALOX5AP;MAPKAPK2;TBXAS1;GGT1;DAGLB	.	Renal cell carcinoma	15/69	0.012456	0.0348992	0	0	2.10244	9.22037	CDKN1A;EGLN3;JUN;MAP2K2;EGLN2;TFE3;PIK3CD;TGFA;CRKL;PAK1;MAPK1;GRB2;ELOC;RAC1;RAF1
	interleukin-12-mediated signaling pathway (GO:0035722)	15/46	0.000149363	0.00575846	0	0	3.6671	32.304	IL10;ARF1;ANXA2;PITPNA;TALDO1;TYK2;SOD2;LMNB1;CNN2;CFL1;IL12B;LCP1;P4HB;JAK2;PLCB1	.	Insulin resistance	21/108	0.0130462	0.0362264	0	0	1.82824	7.93321	MLXIP;PTPN1;CPT1A;INSR;PRKCD;STAT3;OGA;PIK3CD;PRKAG2;NR1H3;PRKCZ;TNFRSF1A;NFKBIA;IKBKB;PTPA;SOCS3;GYS1;PPP1R3B;RPS6KA1;CD36;CREB5
	regulation of erythrocyte differentiation (GO:0045646)	12/32	0.000152156	0.00581423	0	0	4.54418	39.9461	LYN;FAM210B;STAT5B;ZFP36;SPI1;MAFB;CDK6;STAT3;HMGB2;ACVR1B;MAPK14;GATA1	.	Endometrial cancer	13/58	0.0149978	0.0412771	0	0	2.18578	9.17994	TCF7L2;CDKN1A;MAP2K2;GADD45B;GADD45A;PIK3CD;DDB2;GADD45G;CTNNA1;MAPK1;CTNNA3;GRB2;RAF1
	interleukin-23-mediated signaling pathway (GO:0038155)	6/9	0.000156655	0.00583135	0	0	15.1229	132.499	IL23A;STAT3;IL12B;P4HB;TYK2;JAK2	.	Prostate cancer	19/97	0.0163507	0.0446058	0	0	1.84434	7.58666	TCF7L2;CDKN1A;HSP90AA1;MAP2K2;IL1R2;TGFA;PIK3CD;MMP9;ETV5;NFKBIA;IKBKB;PLAU;E2F2;MAPK1;GRB2;E2F3;ERG;RAF1;CREB5
	pinocytosis (GO:0006907)	6/9	0.000156655	0.00583135	0	0	15.1229	132.499	PYCARD;CARMIL1;MAPKAPK3;MAPKAPK2;PPT1;SNX33	.	Nicotinate and nicotinamide metabolism	9/35	0.0168943	0.045688	0	0	2.61738	10.681	BST1;PNP;NMNAT1;NAPRT;SIRT6;SIRT7;NADSYN1;NT5C2;NADK
	positive regulation of cell activation (GO:0050867)	6/9	0.000156655	0.00583135	0	0	15.1229	132.499	SELP;SOX15;RPS6KA1;PLEK;CAPN3;TLR4	.	Bladder cancer	10/41	0.0175459	0.047041	0	0	2.43949	9.86271	CDKN1A;CXCL8;MAP2K2;SRC;E2F2;MAPK1;E2F3;RAF1;THBS1;MMP9
	positive regulation of homeostatic process (GO:0032846)	22/83	0.000163069	0.00601822	0	0	2.73688	23.8692	STAT5B;ATP6AP1;PPP1R10;STAT3;HMGB2;PIK3CD;NR1H3;SIRT6;METRNL;ACVR1B;DEF8;MAPK14;GATA1;FAM210B;DCSTAMP;PINK1;P2RX4;NPC1;PLEKHM1;STX4;LGALS9;C2CD2L	.	Mineral absorption	13/60	0.0197119	0.0520369	0	0	2.09253	8.21638	VDR;SLC40A1;ATP1B3;CLCN2;SLC8A1;ATOX1;FTH1;HMOX1;STEAP1;STEAP2;HMOX2;SLC26A6;FTL
	insulin receptor signaling pathway (GO:0008286)	19/67	0.000171795	0.00628653	0	0	3.00216	26.0264	GSK3A;ATP6V0B;ATP6V0E1;ATP6AP1;INSR;TCIRG1;FOXO4;BAIAP2;PDK4;ATP6V1B2;GRB2;ATP6V1E1;ATP6V0D1;ATP6V1D;RHOQ;ATP6V1C1;PTPN2;ATP6V1F;ATP6V0A1	.	Diabetic cardiomyopathy	34/203	0.0199112	0.0520369	0	0	1.52523	5.97351	NDUFB9;NDUFB7;NCF1;NCF2;NCF4;PIK3CD;NDUFB1;COX7A2;PRKCZ;PTPA;GYS1;MPC2;PDK4;PDK3;CD36;RAC1;NDUFV3;CTSD;G6PD;ACE;ATP5PB;INSR;PRKCD;GSR;NDUFA2;CYBA;MAPK14;MMP9;COX6B1;MAPK13;UQCRC1;VDAC1;PLCB1;GAPDH
	positive regulation of supramolecular fiber organization (GO:1902905)	22/84	0.000196822	0.00711547	0	0	2.69258	22.9764	VASP;TENM1;CARMIL1;GPX1;WDR1;NUMA1;PLEK;RHOG;PSEN1;BAIAP2;CLU;PYCARD;HCK;PAK1;PSRC1;FES;CDC42EP4;CDC42EP3;PTK2B;RAC1;COLGALT1;CDK5R1	.	Viral carcinogenesis	34/203	0.0199112	0.0520369	0	0	1.52523	5.97351	HDAC4;HDAC5;CDKN1A;SRC;GTF2B;HDAC11;PXN;PIK3CD;POLB;CCND3;CASP3;MAPK1;RAC1;JAK3;LYN;STAT5A;STAT5B;JUN;CDKN2B;GSN;H2BC5;ACTN1;STAT3;ACTN4;RHOA;NFKBIA;KAT2B;CDK6;PKM;MAPKAPK2;GRB2;LTBR;ATP6V0D1;CREB5
	intrinsic apoptotic signaling pathway (GO:0097193)	25/101	0.000197743	0.00711547	0	0	2.49736	21.2988	PPP1R15A;DDX5;CDKN1A;CEBPB;SELENOK;KRCC1;TANK;PPM1F;BBC3;PYCARD;STK11;CASP4;ARL6IP5;ZNF385C;SFN;PRODH;ZNF385A;MCL1;BNIP3;PRKCD;STK24;DDIT3;CD24;BCL2L2;BCL2L1	.	Amino sugar and nucleotide sugar metabolism	17838	0.020644	0.0535025	0	0	2.24849	8.72487	GPI;CYB5R1;HK3;GALE;UGP2;NAGK;AMDHD2;UAP1;RENBP;HK1;GALK1
	cellular protein modification process (GO:0006464)	154/1001	0.000201157	0.00717848	0	0	1.39768	11.8963	TP53RK;GMFG;UBE2D3;F13A1;UBE2L6;PLOD1;DCAF4;UBE2L3;TGM1;LIPE;PSMD6;STK11;RPS6KA1;PIM1;MACROD1;MAP3K6;LARGE1;BTRC;TGM3;FBXO9;ACVR1;ATG3;FBXW5;WSB1;FBXW8;CISH;APLP2;PRKCD;SHISA5;LMTK2;CSNK1E;PHKA2;MAPKAPK2;ULK1;ALPK3;PADI4;ERG;RAF1;PPEF1;OBSL1;MTMR3;DAPP1;PRKCZ;STK3;FBXO40;SOCS3;FUT7;IRAK1;MAN2A2;IRAK2;ST3GAL4;MAP3K20;STK38L;ARSG;SOCS6;ATG7;ARSB;MARK2;WDTC1;LYN;SRPK2;NEK6;PLK2;INSR;PLK1;TNK1;FN1;AB…	.	PPAR signaling pathway	15/74	0.0230118	0.0591461	0	0	1.92372	7.25579	CPT1A;GK;ACSL1;ACSL6;LPL;NR1H3;RXRA;SCP2;FABP6;UBC;PLIN2;PPARG;CD36;ACAA1;PPARD
	growth hormone receptor signaling pathway (GO:0060396)	9/20	0.000203292	0.00719521	0	0	6.1918	52.6356	LYN;STAT5A;PTPN1;STAT5B;PXN;STAT3;MAPK1;JAK2;JAK3	.	Galactose metabolism	44439	0.0232209	0.0591943	0	0	2.62934	9.89344	HK3;MGAM;GALE;B4GALT1;UGP2;GAA;HK1;GALK1
	regulation of response to external stimulus (GO:0032101)	26/107	0.000205046	0.00719828	0	0	2.43729	20.6981	SCARB2;SEMA7A;NLRX1;NOD1;NOD2;SBNO2;CASP4;CASP1;GNAT1;NLRP1;GGT1;JAK2;CD55;ANXA1;GP1BA;F2;SELE;ACE2;BST1;HCK;PSMA6;NLRP12;STK24;BCL6;PPEF1;MYD88	.	Sphingolipid metabolism	18203	0.0238898	0.0604043	0	0	2.18919	8.17511	CERS6;SGMS1;SPHK2;SMPD1;SPHK1;GBA;NEU1;PSAP;ACER3;SGPP1;CERS2
	regulation of peptidyl-tyrosine phosphorylation (GO:0050730)	22/85	0.000236586	0.00823855	0	0	2.64969	22.1228	SEMA4D;SRC;ITGB3;TNK2;ITGB2;PRKCD;OSM;PRKCZ;SAMSN1;GATA1;IL22RA2;BST1;TEC;IL23A;ENPP2;IL12B;HCLS1;PTK2B;PTPN6;JAK2;IL6R;CD44	.	ECM-receptor interaction	17/88	0.0252789	0.063401	0	0	1.81205	6.66435	VWF;SDC4;ITGB3;ITGA2;ITGA2B;FN1;GP1BA;LAMC1;THBS2;THBS1;GP5;GP9;COL6A3;ITGB7;CD36;CD44;ITGA9
	activation of protein kinase activity (GO:0032147)	46/233	0.000251301	0.00868095	0	0	1.87273	15.5228	ITGB3;C5AR1;TGFA;NOD1;NOD2;TANK;THBS1;ADCY6;CRKL;STK3;PAK1;IRAK1;IRAK2;UBC;MAP3K20;PROK2;PTK2B;MAPK1;JAK2;MAP3K6;MARK2;MAP3K3;MAP2K4;CARD10;MAP2K2;GADD45B;GADD45A;SLC11A1;INSR;PRKCD;IL18;NRG1;MAPK14;TIRAP;GADD45G;PINK1;MAPKAPK3;STK24;ADORA2B;IL1B;MAPKAPK2;CHI3L1;RAF1;TLR4;CARD14;MAP3K11	.	Folate biosynthesis	44403	0.0263514	0.0655624	0	0	2.78447	10.125	MOCS2;GCH1;MOCOS;GGH;ALPL;MOCS1;GPHN
	cellular response to mechanical stimulus (GO:0071260)	15/48	0.000254325	0.00871568	0	0	3.44446	28.5095	PTGER4;MAP2K4;TNFSF14;GADD45A;BNIP3;TNFRSF1A;CNN2;IL1B;IRF1;CASP1;FAS;FADD;LTBR;TLR4;MYD88	.	Peroxisome	16/82	0.0269732	0.0665768	0	0	1.8344	6.62751	PHYH;ACSL1;IDH1;MPV17L;ACSL6;SOD2;PRDX5;NUDT7;SLC25A17;SCP2;HACL1;FAR2;ACAA1;PEX11G;XDH;CRAT
	positive regulation of protein modification process (GO:0031401)	35/163	0.000259541	0.00874295	0	0	2.07877	17.1635	CSF1R;RALB;FLT4;ITGB3;PELI2;GBA;SPPL3;PTPA;CCND3;PAK1;SMPD1;CHORDC1;FLOT1;RIPK1;RAC1;ATG7;LYN;ACE;SEMA4D;INSR;AKTIP;PRKCD;PLAUR;PPP2R5A;F2;MMP9;MARCO;PINK1;IL1B;DLC1;FAS;WDFY2;FAM20A;CARD14;CALM2	.	Estrogen signaling pathway	24/137	0.028068	0.0687336	0	0	1.60837	5.74689	JUN;HSP90AA1;MAP2K2;SRC;PRKCD;TGFA;KRT23;PIK3CD;KRT34;CALML4;KRT31;MMP9;ADCY6;GNAI2;KRT33B;KRT33A;RARA;MAPK1;GRB2;RAF1;PLCB1;CALM2;CTSD;CREB5
	cellular response to nitrogen starvation (GO:0006995)	7/13	0.000269294	0.00874295	0	0	8.82398	72.5305	BECN1;GABARAPL2;GABARAPL1;MAP1LC3B;MAP1LC3A;ATG7;GABARAP	.	Taurine and hypotaurine metabolism	44297	0.0313861	0.0762585	0	0	4.31616	14.9399	GGT5;CDO1;CSAD;GGT1
	cellular response to interleukin-15 (GO:0071350)	7/13	0.000269294	0.00874295	0	0	8.82398	72.5305	STAT5A;STAT5B;IL15RA;STAT3;GRB2;PLCB1;JAK3	.	Glycosphingolipid biosynthesis	16711	0.0325138	0.078386	0	0	2.1602	7.40104	B4GALT1;FUT7;ST3GAL4;B3GNT3;NAGA;ST6GALNAC4;ABO;B4GALT4;ST3GAL3;ST6GALNAC6
	cellular response to low-density lipoprotein particle stimulus (GO:0071404)	7/13	0.000269294	0.00874295	0	0	8.82398	72.5305	FCER1G;ITGB2;LPL;CD9;PPARG;CD36;LDLR	.	Axon guidance	30/182	0.0332076	0.0794429	0	0	1.49517	5.091	SEMA7A;SEMA3C;SRC;PIK3CD;PRKCZ;MYL12A;MYL12B;GNAI2;EFNB1;PAK1;CFL1;PLXNA2;MAPK1;SLIT3;RAC1;SRGAP2;SRGAP1;SEMA6C;SEMA4A;TRPC5;SEMA4D;LIMK2;SSH3;RHOA;FES;PARD3;PLXNB3;PLXNB2;RAF1;MYL9
	positive regulation of interleukin-17 production (GO:0032740)	7/13	0.000269294	0.00874295	0	0	8.82398	72.5305	IL23A;IL18;IL12B;SLAMF6;NOD2;LY9;MYD88	.	Choline metabolism in cancer	18/98	0.0345665	0.0813246	0	0	1.70266	5.72922	DGKG;JUN;PLA2G4F;DGKD;MAP2K2;WAS;PIK3CD;PLA2G4A;GPCPD1;DGKZ;EIF4EBP1;MAPK1;PIP5K1B;GRB2;PIP5K1C;RAC1;RAF1;WASF2
	interleukin-15-mediated signaling pathway (GO:0035723)	7/13	0.000269294	0.00874295	0	0	8.82398	72.5305	STAT5A;STAT5B;IL15RA;STAT3;GRB2;PLCB1;JAK3	.	Inflammatory mediator regulation of TRP channels	18/98	0.0345665	0.0813246	0	0	1.70266	5.72922	CYP2J2;PTGER4;PLA2G4F;IL1R1;SRC;PRKCD;PIK3CD;PLA2G4A;ALOX12;CALML4;IL1RAP;MAPK14;ADCY6;MAPK13;IL1B;P2RY2;PLCB1;CALM2
	cellular response to nitrogen levels (GO:0043562)	7/13	0.000269294	0.00874295	0	0	8.82398	72.5305	BECN1;GABARAPL2;GABARAPL1;MAP1LC3B;MAP1LC3A;ATG7;GABARAP	.	Oxytocin signaling pathway	26/154	0.0347787	0.0813246	0	0	1.53822	5.1665	RYR1;CDKN1A;SRC;PRKAG2;CALML4;ACTB;ADCY6;MYLK;PIK3R5;GNAI2;RGS2;MAPK7;MAPK1;KCNJ2;GUCY1A1;JUN;PLA2G4F;MAP2K2;PLA2G4A;CACNA2D4;RHOA;MYL6;RAF1;PLCB1;MYL9;CALM2
	positive regulation of cysteine-type endopeptidase activity involved in apoptotic process (GO:0043280)	26/109	0.00028111	0.00905844	0	0	2.37829	19.4467	HIP1;NOD1;NLRC4;TANK;PPM1F;BBC3;PYCARD;CASP3;CASP4;ARL6IP5;CASP1;RIPK1;LGALS9;NLRP1;FADD;JAK2;XDH;EGLN3;GSN;HIP1R;NLRP12;DLC1;FAS;PPARG;S100A9;S100A8	.	Type II diabetes mellitus	17076	0.0373394	0.086661	0	0	2.10008	6.90443	IKBKB;HK3;SOCS3;PKM;INSR;PRKCD;PIK3CD;MAPK1;PRKCZ;HK1
	canonical glycolysis (GO:0061621)	10/25	0.000292554	0.00915396	0	0	5.04619	41.0601	GPI;HK3;PKM;PGAM1;PGK1;ALDOC;ENO1;ALDOA;GAPDH;HK1	.	Glycine, serine and threonine metabolism	14855	0.0384909	0.0886717	0	0	2.1946	7.14854	AOC3;GATM;AOC2;SDS;MAOA;GLYCTK;PGAM1;CTH;PSPH
	negative regulation of insulin receptor signaling pathway (GO:0046627)	10/25	0.000292554	0.00915396	0	0	5.04619	41.0601	SOCS3;PTPN1;PTPRE;GSK3A;CISH;IL1B;PRKCD;GRB10;PRKCZ;PTPN2	.	Selenocompound metabolism	44333	0.0405538	0.092737	0	0	3.14765	10.0886	TXNRD3;CTH;PAPSS2;PAPSS1;PSTK
	glycolytic process through glucose-6-phosphate (GO:0061620)	10/25	0.000292554	0.00915396	0	0	5.04619	41.0601	GPI;HK3;PKM;PGAM1;PGK1;ALDOC;ENO1;ALDOA;GAPDH;HK1	.	Glutamatergic synapse	20/114	0.0415822	0.0943947	0	0	1.61018	5.12051	GRIA1;PLA2G4F;SLC1A1;PLA2G4A;GNG11;ADCY6;GNAI2;GNG10;GRK2;GRIN3A;GNG2;GNG5;GNG4;GNB2;GNG7;MAPK1;HOMER3;DLGAP1;PLCB1;GLUL
	glucose catabolic process to pyruvate (GO:0061718)	10/25	0.000292554	0.00915396	0	0	5.04619	41.0601	GPI;HK3;PKM;PGAM1;PGK1;ALDOC;ENO1;ALDOA;GAPDH;HK1	.	Inositol phosphate metabolism	14/73	0.0420436	0.0947505	0	0	1.7947	5.6875	MTMR3;ITPK1;PIK3CD;OCRL;ITPKC;INPP5A;INPP5D;PI4KA;PIP5K1B;PIP5K1C;PLCB1;CDIPT;PI4K2A;PLCD1
	positive regulation of chemokine production (GO:0032722)	12/34	0.000295455	0.00917824	0	0	4.13061	33.5694	PYCARD;CSF1R;IL7;IL1B;LPL;HMOX1;FFAR2;LGALS9;IL6R;TLR4;TIRAP;TLR2	.	Long-term depression	22251	0.0431412	0.0965245	0	0	1.8904	5.94206	RYR1;GRIA1;LYN;GUCY1A1;PLA2G4F;MAP2K2;GNA11;PLA2G4A;MAPK1;PLCB1;RAF1;GNAI2
	positive regulation of cellular metabolic process (GO:0031325)	23/92	0.000299497	0.00923735	0	0	2.52948	20.5227	RAB1A;CD63;CDKN1A;PRELID1;RAMP3;ANXA2;GADD45A;RAB1B;ACOD1;NR1H3;ECE1;F2;MAPK14;KLF4;THBS1;SELE;NFKBIA;ACE2;PAX8;ROMO1;RIPK1;GRB2;XDH	.	Coronavirus disease	36/232	0.0472962	0.105065	0	0	1.39154	4.24603	CFD;CXCL8;C5AR1;F13A1;PIK3CD;RPS4Y1;IKBKB;C8G;C7;IRAK1;CASP1;IL12B;MAPK1;IL6R;IFNAR2;JUN;RPS9;ACE;VWF;STAT2;STAT3;TYK2;IRAK4;F2;MAPK14;TNFRSF1A;MAPK13;NFKBIA;SELP;ACE2;FCGR2A;IL1B;TLR4;CFB;MYD88;TLR2
	regulation of extrinsic apoptotic signaling pathway (GO:2001236)	17/59	0.000301738	0.00924047	0	0	3.06828	24.8714	ACVR1;TCF7L2;SRC;TNFSF12;NOL3;TANK;THBS1;SH3RF1;DEDD2;PYCARD;LGALS3;DEPTOR;FAS;RIPK1;STX4;FADD;LTBR	.	Arachidonic acid metabolism	22616	0.0482088	0.106333	0	0	1.85172	5.61481	CYP2J2;GGT5;PLA2G4F;GPX1;GPX3;PTGES2;ALOX5;TBXAS1;PLA2G4A;ALOX12;GGT1;LTC4S
	positive regulation of MAP kinase activity (GO:0043406)	37/177	0.000308535	0.00938208	0	0	2.00956	16.2446	TENM1;FLT3;C5AR1;TGFA;NOD1;NOD2;TANK;THBS1;CRKL;PIK3R5;STK3;PAK1;IRAK1;IRAK2;UBC;MAP3K20;PROK2;S100A12;MAPK1;MAP3K6;MAP2K4;MAP2K2;GADD45B;GADD45A;INSR;NRG1;MAPK14;GADD45G;MAPKAPK3;ADORA2B;IL1B;MAPKAPK2;RAF1;CD24;TLR4;MAP3K11;ARHGEF5	.	Natural killer cell mediated cytotoxicity	22/131	0.0515248	0.112847	0	0	1.52747	4.53	IFNAR2;MAP2K2;FCER1G;IFNGR1;IFNGR2;ITGB2;PIK3CD;VAV1;PAK1;TYROBP;CASP3;SH3BP2;MAPK1;PTK2B;FAS;GRB2;CD48;LCP2;PTPN6;RAC1;RAF1;CD244
	regulation of autophagy (GO:0010506)	41/203	0.000324338	0.00979365	0	0	1.92533	15.4675	GSK3A;GBA;PRKAG2;VPS26A;MEFV;STK11;DRAM1;CAPNS1;SLC17A9;CTSK;CASP3;PSAP;KAT8;TBC1D14;CAPN1;ATP6V1E1;WASHC1;ATP6V1D;ATP6V1C1;ATP6V0A1;MCL1;KDM4A;TMEM150B;ATP6V0B;ATP6V0E1;PLK2;BNIP3;TPCN2;TMEM59;PINK1;ATP6V1B2;ULK1;VDAC1;LAMTOR2;LAMTOR1;ATP6V0D1;LAMTOR3;GAPDH;OPTN;CDK5R1;LAMTOR5	.	Human T-cell leukemia virus 1 infection	34/219	0.0523066	0.113357	0	0	1.39204	4.1074	CDKN1A;SPI1;ITGB2;PIK3CD;ADCY6;ETS2;IKBKB;POLB;CCND3;ZFP36;TSPO;E2F2;MAPK1;E2F3;JAK3;STAT5A;IL15RA;STAT5B;MAP3K3;MAP2K4;JUN;CDKN2B;MAP2K2;IL1R1;IL1R2;TNFRSF1A;NFKBIA;KAT2B;IL2RA;VDAC1;LTBR;TLN1;BCL2L1;CREB5
	amide biosynthetic process (GO:0043604)	14/44	0.000328981	0.00986485	0	0	3.5354	28.3522	ARG2;CERS6;SGMS1;GBA;ACOD1;FURIN;CLN8;NMRAL1;ASS1;SMPD1;DMD;SPTSSA;NAGS;CERS2	.	GABAergic synapse	16/89	0.0526233	0.113357	0	0	1.65783	4.88165	GABARAPL2;GABRB1;GABARAPL1;SRC;GNG11;GPHN;ADCY6;GABARAP;GNAI2;GNG10;GNG2;GNG5;GNG4;GNG7;GNB2;GLUL
	regulation of MAP kinase activity (GO:0043405)	22/87	0.000337797	0.0100594	0	0	2.56787	20.5252	LYN;TENM1;PTPN1;RGS14;FLT3;CD300A;DUSP1;PRKCD;PAQR3;GBA;NOD2;SORL1;PIK3R5;RGS2;IRAK1;HGS;SMPD1;IL1B;S100A12;SPRY1;TRIB1;CD24	.	Starch and sucrose metabolism	13363	0.0528512	0.113357	0	0	2.15921	6.34866	GPI;GYS1;HK3;MGAM;UGP2;GAA;GYG1;HK1
	cellular response to lipid (GO:0071396)	37/178	0.000346361	0.0102215	0	0	1.99519	15.8977	RET;RARG;CXCL8;RAMP3;SERPINE1;TWF2;HMGB2;TFPI;ADCY6;UBE2L3;PYCARD;ZFP36;SBNO2;PDK4;CASP1;PDK3;PTK2B;FFAR2;CD14;LBP;LYN;IL10;FZD4;VDR;TESC;ACOD1;NR1H3;TNFRSF1B;MAPK14;RHOA;FAM210B;TNIP1;TNIP2;TNIP3;RARA;ADTRP;TLR4	.	T cell receptor signaling pathway	18/104	0.0572714	0.121996	0	0	1.58333	4.52824	IL10;JUN;MAP2K2;PIK3CD;MAPK14;RHOA;VAV1;MAPK13;NFKBIA;IKBKB;PAK1;TEC;MAPK1;GRB2;LCP2;PTPN6;RAF1;NFKBIE
	positive regulation of JNK cascade (GO:0046330)	20/76	0.000352445	0.0102215	0	0	2.70865	21.5355	NCF1;GADD45B;GADD45A;FLT4;CARD9;NOD2;TANK;TIRAP;GADD45G;PYCARD;SDCBP;PAK1;IL1B;PTK2B;RIPK1;LTBR;PLCB1;FCGR2B;ARHGEF5;MAP3K11	.	Tight junction	27/169	0.057743	0.122164	0	0	1.43937	4.10472	SRC;ARPC1B;WAS;PRKAG2;F11R;PRKCZ;ACTB;MYL12A;MYL12B;STK11;RAC1;JAM3;VASP;ACTR3;JUN;ACTN1;ARPC4;ACTN4;ARPC5;RHOA;MYL6;ARPC3;PARD3;RAB13;HCLS1;MYH9;MYL9
	regulation of amyloid-beta clearance (GO:1900221)	6/10	0.000352709	0.0102215	0	0	11.3415	90.1637	LRPAP1;LRP1;ABCA7;CLU;LDLR;PICALM	.	Pathways of neurodegeneration	67/475	0.0604021	0.126046	0	0	1.24577	3.49655	RYR1;HIP1;UBE2L6;CALML4;ZFYVE1;UBE2L3;PSMD6;CASP7;CASP3;TUBB1;CAPN2;RAC1;CAPN1;GABARAPL2;GABARAPL1;MAP2K2;GPX1;GPX3;WIPI1;CSNK1E;TNFRSF1B;TNFRSF1A;COX6B1;PSMA6;DDIT3;IL1B;UQCRC1;ULK1;VDAC1;PLCB1;RAF1;OPTN;GRIA1;BECN1;NDUFB9;RAB1A;DCTN5;NDUFB7;DNAH2;DCTN2;DCTN4;NDUFB1;COX7A2;DNAH9;PSEN1;TANK;GABARAP;KLC4;UBC;MAPK1;FADD;NDUFV3;DNAH17;FZD4;ATP5PB;NDUFA2;SEPTIN5;UBE2G1;MAPK14;MAPK13;PINK1;ATG2A;FAS;C…
	detection of bacterium (GO:0016045)	6/10	0.000352709	0.0102215	0	0	11.3415	90.1637	PGLYRP4;PGLYRP2;NOD1;NOD2;NLRC4;PGLYRP1	.	Growth hormone synthesis, secretion and action	20/119	0.0607544	0.126046	0	0	1.52843	4.28099	STAT5A;MAP2K4;STAT5B;MAP2K2;STAT3;PIK3CD;MAPK14;ADCY6;CRKL;GNAI2;MAPK13;SOCS3;GNA11;MAPK1;GRB2;RAF1;JAK2;PLCB1;JUNB;CREB5
	MyD88-independent toll-like receptor signaling pathway (GO:0002756)	11/30	0.000359539	0.0103499	0	0	4.3831	34.761	IKBKB;TNIP3;UBE2D3;UBC;UBE2D1;LY96;RIPK1;FADD;CD14;TANK;TLR4	.	African trypanosomiasis	13728	0.0607938	0.126046	0	0	2.08463	5.83753	IL10;IL1B;IL18;IL12B;FAS;PLCB1;SELE;MYD88
	interleukin-18-mediated signaling pathway (GO:0035655)	5/7	0.000374626	0.0105331	0	0	18.8966	149.086	IL18RAP;ALOX5;IL18;IL18R1;IL18BP	.	Glycosaminoglycan degradation	44335	0.062666	0.129067	0	0	2.69768	7.47241	GALNS;NAGLU;HYAL1;ARSB;SGSH
	cellular response to interleukin-18 (GO:0071351)	5/7	0.000374626	0.0105331	0	0	18.8966	149.086	IL18RAP;ALOX5;IL18;IL18R1;IL18BP	.	Cellular senescence	25/156	0.0638964	0.130735	0	0	1.44432	3.97258	CDKN1A;CXCL8;SERPINE1;PIK3CD;CALML4;CCND3;CAPN2;EIF4EBP1;E2F2;MAPK1;E2F3;CAPN1;BTRC;CDKN2B;MAP2K2;GADD45B;GADD45A;MAPK14;GADD45G;MAPK13;CDK6;MAPKAPK2;VDAC1;RAF1;CALM2
	leukocyte aggregation (GO:0070486)	5/7	0.000374626	0.0105331	0	0	18.8966	149.086	SEMA4D;IL1B;S100A9;CD44;S100A8	.	Alcoholism	29/186	0.0656983	0.133544	0	0	1.39829	3.80711	HDAC4;HDAC5;MAOA;HDAC11;CALML4;MACROH2A1;CAMKK1;GNAI2;GNG10;GNG2;GNG5;GNG4;GNG7;H3C12;MAPK1;H3-3B;H2AC6;H2BC5;H2AC4;GNG11;H2AJ;GRIN3A;ADORA2A;ADORA2B;GNB2;GRB2;RAF1;CALM2;CREB5
	response to reactive oxygen species (GO:0000302)	17/60	0.00037566	0.0105331	0	0	2.99676	23.6349	JUN;GPX1;NCF1;TXNRD3;MPV17L;TPM1;PXN;PKD2;SOD2;MMP9;PRDX5;STK24;HYAL1;DLC1;HMOX1;MAPK1;ROMO1	.	Hepatitis C	25/157	0.0679013	0.137125	0	0	1.43329	3.85513	SCARB1;CDKN1A;PIK3CD;IKBKB;SOCS3;RXRA;CASP3;E2F2;MAPK1;RIPK1;E2F3;FADD;LDLR;IFNAR2;MAP2K2;STAT2;STAT3;NR1H3;TYK2;TNFRSF1A;NFKBIA;CDK6;FAS;GRB2;RAF1
	positive regulation of cell motility (GO:2000147)	37/179	0.000388265	0.0108163	0	0	1.98103	15.5586	RET;CSF1R;CEMIP;SEMA7A;NOTCH1;CD151;SEMA3C;PIK3CD;THBS1;CXCL16;MYLK;SDCBP;PAK1;PLAU;HMCN2;CTSH;PTK2B;STX4;WASHC1;ACVR1;CCR1;CARMIL1;SEMA4A;SEMA4D;INSR;SPHK1;TACR3;ACTN4;SOD2;MMP9;FGR;IL1B;SNAI1;NUMB;ROR2;LGR6;FERMT3	.	Ras signaling pathway	35/232	0.069343	0.139133	0	0	1.34535	3.59033	CSF1R;RAB5C;RALB;FLT3;FLT4;TGFA;PIK3CD;CALML4;FOXO4;ETS2;RASGRP4;IKBKB;GNG10;PAK1;HTR7;GNG2;GNG5;GNG4;GNG7;MAPK1;RAC1;PLA2G4F;MAP2K2;INSR;PLA2G4A;GAB2;GNG11;RHOA;GNB2;GRB2;RIN1;RGL1;RAF1;CALM2;BCL2L1
	negative regulation of programmed cell death (GO:0043069)	71/408	0.000393478	0.0108913	0	0	1.60768	12.605	RET;FLT3;CITED2;FLT4;SH3RF1;IKBKB;MAEA;CASP3;CFL1;CLEC5A;RPS6KA1;PIM1;PROK2;CTSH;CAPN3;HTATIP2;IL10;BNIP3L;ANXA1;SPHK2;ANXA4;SPHK1;ANXA5;PLAUR;LMTK2;WDR73;MMP9;RNF144B;HCK;DDAH2;TMBIM6;ROR2;ATF5;RAF1;CRYAB;CARD14;NAIP;CD44;LTF;CSF1R;SRC;PSEN1;NOL3;GATA1;THBS1;PRDX5;IRAK1;BAG3;UBC;PTK2B;MCL1;PRELID1;SEMA4D;PLK2;INSR;BNIP3;PLK1;STAT3;MERTK;HYPK;NFKBIA;IL7;BCL3;PPT1;FAS;EVI2B;MYD88;BCL2L2;TPT1;LAMTO…	.	Purine metabolism	21/129	0.0735217	0.146572	0	0	1.47099	3.83954	ENTPD1;GUCY1A1;AK1;AK3;GMPR;AK4;AMPD2;AMPD3;NT5C2;DCK;ADCY6;PAPSS2;PAPSS1;NT5C3A;PNP;PKM;PDE4A;PDE6C;HPRT1;ADSS2;XDH
	regulation of NF-kappaB import into nucleus (GO:0042345)	10/26	0.000425811	0.0115136	0	0	4.73053	36.7161	NFKBIA;IL23A;SPHK1;IL1B;BCL3;IL12B;LGALS9;TLR4;RHOA;TLR2	.	Fructose and mannose metabolism	12236	0.0836258	0.165654	0	0	2.034	5.04716	HK3;PFKFB4;PFKFB3;ALDOC;ALDOA;HK1;KHK
	negative regulation of cellular response to insulin stimulus (GO:1900077)	10/26	0.000425811	0.0115136	0	0	4.73053	36.7161	SOCS3;PTPN1;PTPRE;GSK3A;CISH;IL1B;PRKCD;GRB10;PRKCZ;PTPN2	.	Glycosaminoglycan biosynthesis	19633	0.0851116	0.16753	0	0	1.75751	4.33013	B4GALT1;CHSY1;CHPF2;DSE;UST;CHST15;HS6ST1;HS6ST2;B4GALT4;ST3GAL3
	apoptotic cell clearance (GO:0043277)	10/26	0.000425811	0.0115136	0	0	4.73053	36.7161	FCN1;XKR8;SCARB1;LRP1;ITGB3;RHOG;RARA;NR1H3;RAC1;THBS1	.	Dopaminergic synapse	21/132	0.0889418	0.173968	0	0	1.43099	3.46267	GRIA1;GSK3A;MAOA;PPP2R5A;CALML4;COMT;MAPK14;GNG11;GNAI2;MAPK13;GNG10;GNAL;GNG2;GNG5;GNG4;PPP2R3C;GNB2;GNG7;PLCB1;CALM2;CREB5
	peptidyl-tyrosine autophosphorylation (GO:0038083)	14/45	0.000426628	0.0115136	0	0	3.42116	26.5468	LYN;SRC;TNK2;TNK1;TYK2;BMX;FGR;HCK;TEC;FES;PTK2B;GRB2;JAK2;JAK3	.	Pantothenate and CoA biosynthesis	44337	0.0903344	0.175587	0	0	2.3602	5.67449	VNN1;ALDH2;VNN2;DPYS;DPYD
	protein targeting to membrane (GO:0006612)	17/61	0.000464713	0.0124635	0	0	2.92848	22.4734	ATG3;NCF1;RAB3IP;ZDHHC7;ZDHHC21;ZDHHC2;ZDHHC3;ZDHHC4;GOLGA7B;SDCBP;ZDHHC18;PARD3;SRPRA;CHMP4B;SEC62;GOLGA7;ATG4D	.	Oxidative phosphorylation	21/133	0.0945183	0.182579	0	0	1.41813	3.34532	NDUFB9;ATP6V0B;ATP6V0E1;NDUFB7;ATP6AP1;ATP5PB;NDUFA2;NDUFB1;COX7A2;TCIRG1;COX6B1;UQCRC1;ATP6V1B2;NDUFV3;ATP6V1E1;ATP6V0D1;ATP6V1D;ATP6V1C1;ATP5ME;ATP6V0A1;ATP6V1F
	negative regulation of sprouting angiogenesis (GO:1903671)	9/22	0.000483915	0.0128265	0	0	5.23862	39.9895	HDAC5;CARD10;NOTCH1;E2F2;KLF4;SYNJ2BP;THBS1;RHOA;EPN2	.	Circadian entrainment	16/97	0.0984521	0.189004	0	0	1.49342	3.46202	GRIA1;RYR1;GUCY1A1;CALML4;GNG11;ADCY6;GNAI2;GNG10;GNG2;GNG5;GNG4;GNB2;GNG7;MAPK1;PLCB1;CALM2
	positive regulation of interleukin-8 secretion (GO:2000484)	7/14	0.000484186	0.0128265	0	0	7.56298	57.7286	FCN1;PYCARD;FFAR2;CD14;LGALS9;CD244;TLR2	.	Arginine biosynthesis	44338	0.106171	0.202571	0	0	2.22124	4.9816	ARG2;GPT2;NAGS;GLUL;ASS1
	negative regulation of tumor necrosis factor superfamily cytokine production (GO:1903556)	11/31	0.000498784	0.0131326	0	0	4.16371	31.6581	IL10;ORM1;ARG2;C5AR2;RARA;BPI;LBP;LGALS9;TLR4;LILRA4;LTF	.	Neomycin, kanamycin and gentamicin biosynthesis	44232	0.10764	0.204121	0	0	5.03235	11.2169	HK3;HK1
	extracellular matrix disassembly (GO:0022617)	20/78	0.000508898	0.013239	0	0	2.61495	19.8299	ELN;HTRA1;FN1;FURIN;LAMC1;MMP8;MMP9;CTSS;SCUBE3;BMP1;CAPNS1;CTSK;SH3PXD2B;TIMP2;CAPN2;FLOT1;CAPN1;LCP1;WASHC1;CD44	.	Fatty acid degradation	15919	0.123347	0.23249	0	0	1.72668	3.61352	ACADVL;CPT1A;ACAA2;ALDH2;ACSL1;ACSL6;ACAA1;ALDH9A1
	negative regulation of response to external stimulus (GO:0032102)	25/107	0.000508958	0.013239	0	0	2.31383	17.5461	PTGER4;NLRX1;TNFAIP6;SERPINE1;GBA;NOD1;NOD2;METRNL;MEFV;MAPK7;TNFAIP8L2;IL10;PRKCD;ACOD1;NR1H3;KLF4;TNFRSF1A;NLRP12;PPARG;TRIB1;SMPDL3B;PTPN2;CERS2;LTF;PPARD	.	Phenylalanine metabolism	44303	0.129096	0.241861	0	0	2.32329	4.75624	AOC3;AOC2;MAOA;ALDH3B1
	positive regulation of cellular process (GO:0048522)	86/519	0.000533497	0.0137943	0	0	1.51722	11.4339	RNF10;SLC35F6;NUMA1;FLT3;CITED2;FLT4;TCIRG1;GLI1;AREG;CXCL5;CXCL16;TNFSF13B;CRKL;TGM1;CAPNS1;HYAL1;RPS6KA1;FLOT1;PROK2;CTSH;LBP;CD36;CAPN1;JUNB;IL6R;RPS9;SPHK1;PRKCD;NSMCE1;RHOG;TBC1D8;NRG1;ACTN4;GAB2;EREG;HCK;PARD3;IL1B;RARA;HCLS1;S100A9;S100A8;CCL14;HDAC4;CSF1R;NOTCH1;RAMP3;MYRF;LRP1;TGFA;DERL2;THBS1;TSPAN31;RAB21;SDCBP;PAK1;RAB25;SERTAD1;NACC2;CXCR2;PTK2B;STX4;ROMO1;STX3;PRODH;LYN;SRPK2;JUN;IN…	.	Melanoma	26634	0.131206	0.244343	0	0	1.51129	3.06941	CDKN1A;MAP2K2;CDK6;GADD45B;GADD45A;PIK3CD;E2F2;MAPK1;E2F3;RAF1;DDB2;GADD45G
	regulation of cytokine-mediated signaling pathway (GO:0001959)	22/90	0.000560309	0.0144013	0	0	2.45416	18.3744	IFNAR2;PTPN1;IFNGR1;SPHK1;IFNGR2;STAT2;TYK2;TANK;TNFRSF1A;PYCARD;IKBKB;SOCS3;IRAK1;IRAK2;IL7;UBC;RIPK1;PTPN6;RBCK1;JAK2;CD24;PTPN2	.	Aldosterone-regulated sodium reabsorption	13697	0.134788	0.249517	0	0	1.7624	3.53194	FXYD4;INSR;PIK3CD;MAPK1;SFN;ATP1B3;SGK1
	positive regulation of sequence-specific DNA binding transcription factor activity (GO:0051091)	42/215	0.000571515	0.0146024	0	0	1.84652	13.7884	HDAC4;HDAC5;NOD1;NOD2;NLRC4;PRKCZ;TANK;CLU;STK3;IKBKB;PYCARD;IRAK1;IRAK2;UBC;S100A12;CAPN3;RIPK1;LGALS9;CD36;IL10;FZD4;ANXA3;SPHK1;NFAM1;BUD31;IRAK4;TIRAP;NFKBIA;PSMA6;DDIT3;IL1B;PPARG;RBCK1;RAB7B;TLR4;S100A9;CARD14;ARHGEF5;S100A8;MYD88;TLR2;LTF	.	Vasopressin-regulated water reabsorption	16285	0.136191	0.250623	0	0	1.67862	3.34666	DCTN5;RAB5C;DCTN2;DCTN4;STX4;ADCY6;RAB11A;CREB5
	actin filament organization (GO:0007015)	27/120	0.00058549	0.0148714	0	0	2.20389	16.4037	HIP1;WAS;FRY;ARHGAP12;RAC1;CAP1;CARMIL1;GSN;TPM4;ACTN1;TPM1;RHOG;HIP1R;MYBPH;DSTN;ARPC4;BAIAP2;ARHGAP25;RHOA;SHROOM4;BIN3;FAT1;LCP1;ALDOA;OBSL1;RHOQ;DBN1	.	Retrograde endocannabinoid signaling	22/148	0.142501	0.260693	0	0	1.3201	2.5721	GRIA1;NDUFB9;GABRB1;DAGLA;NDUFB7;NDUFA2;NDUFB1;MAPK14;GNG11;ADCY6;GNAI2;MAPK13;GNG10;GNG2;GNG5;GNG4;GNB2;GNG7;MAPK1;NDUFV3;DAGLB;PLCB1
	negative regulation of peptidyl-tyrosine phosphorylation (GO:0050732)	10/27	0.000605833	0.0152982	0	0	4.45202	32.9846	SOCS3;SEMA4D;CD300A;MVP;PRKCD;PTPN6;THY1;PRKCZ;SAMSN1;PTPN2	.	Cholinergic synapse	17/113	0.167243	0.304168	0	0	1.33826	2.39322	PIK3CD;GNG11;ADCY6;PIK3R5;GNAI2;GNG10;GNG2;GNG5;GNG4;GNB2;GNA11;GNG7;MAPK1;JAK2;PLCB1;KCNJ2;CREB5
	Ras protein signal transduction (GO:0007265)	43/223	0.000655675	0.0164605	0	0	1.81703	13.3186	RAB1A;CDKN1A;RAB5C;GDI1;RAB3D;RAB1B;BRK1;CRKL;RAB43;RAB21;RAB44;PAK1;RAB20;RAB25;CFL1;RAB24;RAC1;ARHGEF11;JUN;DBNL;PLK2;RHOG;RAB27B;MYO9B;MAPK14;RHOA;RAB11A;RAB32;SHTN1;RAB31;MAPKAPK3;CDC42EP4;CNKSR3;CDC42EP3;MAPKAPK2;RAB13;RABL3;RAB18;GRB2;TAX1BP3;RAB7B;RHOQ;RAB7A	.	Parathyroid hormone synthesis, secretion and action	16/106	0.1728	0.312447	0	0	1.34339	2.35848	ARHGEF11;CDKN1A;VDR;RHOA;ADCY6;GNAI2;MMP25;MAFB;RXRA;BGLAP;GNA11;PDE4A;MAPK1;RAF1;PLCB1;CREB5
	positive regulation of proteolysis (GO:0045862)	15/52	0.000662927	0.0165463	0	0	3.07139	22.479	GBA;PLK1;FURIN;SNX33;TNFRSF1B;TANK;PINK1;ASPH;TNIP1;IL1B;CAPN3;CTSH;FADD;BTRC;CTSC	.	Hepatocellular carcinoma	24/168	0.176255	0.316852	0	0	1.25989	2.18695	GSTM3;TCF7L2;CDKN1A;MAP2K2;GADD45B;TXNRD3;FZD4;GADD45A;MGST1;MGST2;TGFA;PIK3CD;ACTB;GADD45G;DDB2;CDK6;HMOX1;E2F2;MAPK1;GRB2;E2F3;RAF1;BCL2L1;NFE2L2
	positive regulation of transcription factor import into nucleus (GO:0042993)	11/32	0.000680352	0.0167872	0	0	3.96522	28.9179	BAG3;IL23A;SPHK1;IL1B;IL12B;HCLS1;LGALS9;SPPL3;TLR4;RHOA;TLR2	.	Other types of O-glycan biosynthesis	17380	0.178477	0.317953	0	0	1.54923	2.66978	LFNG;GALNT11;POFUT2;B4GALT1;GALNTL5;PLOD3;COLGALT1;ST3GAL3
	regulation of nitric oxide biosynthetic process (GO:0045428)	11/32	0.000680352	0.0167872	0	0	3.96522	28.9179	HSP90AA1;P2RX4;DDAH2;INSR;IL1B;CD36;PKD2;KLF4;CLU;TLR4;ASS1	.	Renin secretion	25508	0.178912	0.317953	0	0	1.43267	2.46542	PTGER4;GUCY1A1;ACE;ORAI1;CALML4;PLCB1;CALM2;ADCY6;KCNJ2;CTSB;GNAI2
	regulation of intrinsic apoptotic signaling pathway (GO:2001242)	14/47	0.000697304	0.0170529	0	0	3.21345	23.3563	SGMS1;SRC;SIAH1;PLAUR;MMP9;HERPUD1;PYCARD;PINK1;P4HB;S100A9;S100A8;BCL2L2;MCL1;BCL2L1	.	Glycosylphosphatidylinositol (GPI)-anchor biosynthesis	44342	0.181249	0.320275	0	0	1.79774	3.07034	DPM2;PIGB;PIGN;PIGF;PIGH
	low-density lipoprotein receptor particle metabolic process (GO:0032799)	6/11	0.000699018	0.0170529	0	0	9.07272	65.9209	AP2S1;CLTA;PPARG;AP2A1;VLDLR;AP2A2	.	Arrhythmogenic right ventricular cardiomyopathy	28460	0.185416	0.325787	0	0	1.39464	2.35019	TCF7L2;ITGB3;ITGA2;ITGA2B;CTNNA1;ITGB7;CTNNA3;DMD;CACNA2D4;ACTB;SLC8A1;ITGA9
	autophagosome maturation (GO:0097352)	9/23	0.000712921	0.0172943	0	0	4.86416	35.2464	VAMP8;GABARAPL2;GABARAPL1;MAP1LC3B;MAP1LC3A;STX17;LAMP2;CHMP3;GABARAP	.	Huntington disease	41/306	0.198782	0.347228	0	0	1.17006	1.8903	GRIA1;BECN1;DCTN5;NDUFB9;HIP1;DNAH2;NDUFB7;DCTN2;DCTN4;CLTB;CLTA;NDUFB1;AP2A1;COX7A2;DNAH9;AP2A2;BBC3;KLC4;PSMD6;CASP3;TUBB1;AP2S1;NDUFV3;POLR2J;GPX1;DNAH17;ATP5PB;GPX3;NDUFA2;WIPI1;SOD2;COX6B1;PSMA6;UQCRC1;ATG2A;ULK1;VDAC1;PPARG;PLCB1;ACTR10;CREB5
	negative regulation of MAPK cascade (GO:0043409)	20/80	0.000722285	0.0174236	0	0	2.5275	18.2817	LYN;PTPN1;PTPRR;RGS14;CD300A;DUSP1;PRKCD;PAQR3;GBA;SYNJ2BP;SORL1;SPRED1;RGS2;TNIP1;SMPD1;IL1B;CNKSR3;SPRY1;TLR4;PTPN2	.	Protein processing in endoplasmic reticulum	24/171	0.199852	0.347228	0	0	1.23397	1.98691	PPP1R15A;HSP90AA1;UBE2D3;EDEM2;NGLY1;DNAJB12;UBE2D1;DERL2;UBE2G1;RNF5;HERPUD1;DNAJB1;HSPH1;OS9;DDIT3;CAPN2;UBXN8;HYOU1;CAPN1;P4HB;SEC62;CRYAB;UBXN6;NFE2L2
	positive regulation of activated T cell proliferation (GO:0042104)	8/19	0.000797469	0.0191304	0	0	5.50146	39.2478	PYCARD;IL23A;IL18;TNFSF9;IL12B;FADD;CD24;ICOSLG	.	Fatty acid elongation	44343	0.20249	0.349562	0	0	1.71593	2.74045	ACAA2;ACOT7;PPT1;PPT2;HACD2
	positive regulation of cysteine-type endopeptidase activity involved in apoptotic signaling pathway (GO:2001269)	7/15	0.00081633	0.0193677	0	0	6.61723	47.0531	GSN;FAS;RIPK1;FADD;LGALS9;JAK2;TANK	.	Pyrimidine metabolism	20699	0.203443	0.349562	0	0	1.44619	2.30287	NT5C3A;CDA;ENTPD1;PNP;DPYS;DPYD;UPP1;NT5C2;DCK
	myeloid cell development (GO:0061515)	7/15	0.00081633	0.0193677	0	0	6.61723	47.0531	MPIG6B;ANXA2;SRC;EVI2B;GATA1;ZNF385A;TLR2	.	Cysteine and methionine metabolism	18476	0.22572	0.385708	0	0	1.43833	2.14089	LDHB;LDHA;SDS;AHCY;GSS;CTH;SMS;CDO1
	hydrogen ion transmembrane transport (GO:1902600)	10/28	0.000844351	0.0199173	0	0	4.20444	29.7546	ATP6V0B;ATP6V0E1;ATP6AP1;UCP2;ATP6V1B2;TCIRG1;ATP6V1E1;ATP6V0D1;ATP6V1C1;ATP6V1F	.	Signaling pathways regulating pluripotency of stem cells	20/143	0.230566	0.391836	0	0	1.22851	1.8025	ACVR1;SMAD1;ZFHX3;MAP2K2;FZD4;STAT3;PIK3CD;ACVR1B;KLF4;MAPK14;ACVR2B;MAPK13;MEIS1;ID1;MAPK1;PCGF1;GRB2;RAF1;JAK2;JAK3
	positive regulation of protein polymerization (GO:0032273)	17/64	0.000848721	0.0199173	0	0	2.74109	19.3844	VASP;TENM1;CARMIL1;NUMA1;RHOG;BAIAP2;PYCARD;HCK;PAK1;PINK1;PSRC1;FES;CDC42EP4;CDC42EP3;PTK2B;RAC1;CDK5R1	.	AMPK signaling pathway	17/120	0.236533	0.399792	0	0	1.24681	1.79749	CPT1A;PFKFB4;PFKFB3;INSR;PIK3CD;PRKAG2;PPP2R5A;ADIPOR1;LIPE;GYS1;STK11;PPP2R3C;EIF4EBP1;ULK1;PPARG;CD36;CREB5
	positive regulation of protein catabolic process (GO:0045732)	20/81	0.000855237	0.0199617	0	0	2.48593	17.5609	GSK3A;HSP90AA1;EGLN2;LRP1;SMURF1;PLK2;TNFSF12;FURIN;WWP2;SNX33;TNFRSF1B;OAZ1;SORL1;OAZ2;IL1B;HECW2;STX5;RILP;ATG7;RAB7A	.	Ovarian steroidogenesis	18841	0.242393	0.407482	0	0	1.4048	1.99088	CYP2J2;SCARB1;PLA2G4F;ALOX5;INSR;PLA2G4A;LDLR;ADCY6
	regulation of epithelial cell migration (GO:0010632)	14/48	0.000879707	0.0204225	0	0	3.11876	21.9433	DOCK5;PTPRR;SRC;ADIPOR1;PPM1F;RAB11A;PTPRG;RAB25;GLIPR2;HYAL1;ENPP2;CTSH;DOCK1;ARSB	.	Hypertrophic cardiomyopathy	13/90	0.251354	0.420274	0	0	1.27508	1.76075	ACE;TPM4;ITGB3;ITGA2;ITGA2B;TPM1;PRKAG2;CACNA2D4;ACTB;SLC8A1;ITGB7;DMD;ITGA9
	negative regulation of protein homooligomerization (GO:0032463)	5/8	0.000902344	0.0206155	0	0	12.597	88.3117	SRC;RIOK3;GBA;CLU;CRYAB	.	Thiamine metabolism	44270	0.252949	0.420679	0	0	1.88698	2.59378	AK1;ALPL;AK4
	regulation of dendritic cell antigen processing and presentation (GO:0002604)	5/8	0.000902344	0.0206155	0	0	12.597	88.3117	SLC11A1;NOD1;NOD2;FCGR2B;THBS1	.	Amyotrophic lateral sclerosis	47/364	0.257004	0.42515	0	0	1.12084	1.52285	GRIA1;BECN1;DCTN5;NDUFB9;RAB1A;DNAH2;NDUFB7;DCTN2;DCTN4;NDUFB1;COX7A2;DNAH9;TANK;ACTB;GABARAP;KLC4;PSMD6;CASP3;TUBB1;CASP1;RAC1;NDUFV3;GABARAPL2;GABARAPL1;GPX1;DNAH17;ATP5PB;GPX3;NDUFA2;ANXA11;NRG1;WIPI1;TNFRSF1B;MAPK14;COX6B1;TNFRSF1A;MAPK13;PSMA6;PINK1;DDIT3;UQCRC1;ATG2A;ULK1;VDAC1;ACTR10;OPTN;BCL2L1
	4-hydroxyproline metabolic process (GO:0019471)	5/8	0.000902344	0.0206155	0	0	12.597	88.3117	EGLN3;EGLN2;HOGA1;P4HB;PRODH	.	Glyoxylate and dicarboxylate metabolism	44346	0.270428	0.44499	0	0	1.50976	1.97439	ACSS2;GLYCTK;ACO1;HOGA1;GLUL
	regulation of interleukin-12 production (GO:0032655)	11/33	0.000913634	0.0207635	0	0	3.78476	26.4861	IL10;IL23A;IL12B;MEFV;PLCB1;THBS1;JAK3;TLR4;TIRAP;CMKLR1;TLR2	.	Gastric acid secretion	28065	0.272993	0.446846	0	0	1.27787	1.65908	HRH2;ATP1B3;CALML4;PLCB1;CALM2;KCNK2;ACTB;ADCY6;KCNJ2;MYLK;GNAI2
	positive regulation of interferon-gamma production (GO:0032729)	13/43	0.000918722	0.0207699	0	0	3.28146	22.9457	SLC11A1;IL18;IL27;PYCARD;IL23A;IL1B;IL12B;SLAMF6;FADD;CD14;LGALS9;TLR4;CD244	.	Ubiquitin mediated proteolysis	19/140	0.280889	0.457363	0	0	1.186	1.50598	PPIL2;FBXW8;UBE2B;SMURF1;UBE2D3;SIAH1;UBE2D1;UBE2L6;UBE2G1;WWP2;UBE2L3;DDB2;SOCS3;UBE2W;COP1;UBE2Q2;UBC;ELOC;BTRC
	regulation of protein metabolic process (GO:0051246)	16/59	0.000935746	0.0210445	0	0	2.81926	19.662	SERPINB4;ACE;LRP1;GBA;PLAUR;LTBP4;FURIN;BTBD11;KLF4;ABTB2;MAPK7;HGS;IL12B;IGF2BP2;FOLR2;LDLR	.	RIG-I-like receptor signaling pathway	25842	0.300702	0.487074	0	0	1.25833	1.51206	IKBKB;NFKBIA;CXCL8;NLRX1;IL12B;RIPK1;FADD;MAPK14;TANK;MAPK13
	positive regulation of protein serine/threonine kinase activity (GO:0071902)	26/118	0.00101877	0.0227713	0	0	2.14453	14.774	CSF1R;TENM1;CEMIP;RALB;FLT3;SRC;NOD2;TANK;PIK3R5;CCND3;STK11;IRAK1;S100A12;CCNL1;CARD10;MAP2K2;PARP16;TIRAP;RHOA;PSRC1;IL1B;CHI3L1;CD24;CARD14;CALM2;LTF	.	Pyruvate metabolism	17349	0.308803	0.497222	0	0	1.32105	1.5523	LDHB;LDHA;ACSS2;PC;PKM;ALDH2;ALDH9A1
	transition metal ion homeostasis (GO:0055076)	9/24	0.00102307	0.0227713	0	0	4.53962	31.255	SLC25A37;SLC11A1;HFE;HMOX1;FBXL5;ATOX1;HMOX2;PICALM;FTL	.	cGMP-PKG signaling pathway	22/167	0.310164	0.497222	0	0	1.14588	1.34143	VASP;GUCY1A1;MAP2K2;INSR;IRAG1;ATP1B3;CALML4;SLC8A1;RHOA;ADCY6;MYLK;PIK3R5;GNAI2;RGS2;GNA11;MAPK1;VDAC1;RAF1;PLCB1;MYL9;CALM2;CREB5
	muscle contraction (GO:0006936)	29/137	0.00106374	0.0235551	0	0	2.03839	13.9548	RYR1;PXN;DYSF;SLC8A1;MYL12A;LTB4R;MYLK;MYL12B;CALD1;CHRNE;HMCN2;TNNI2;DMD;ANKRD2;SNTA1;ARHGEF11;TPM4;TPM1;MYBPH;TPCN2;ACTA2;MYL6;ASPH;VIM;TLN1;ALDOA;OBSL1;MYL9;CRYAB	.	Intestinal immune network for IgA production	17715	0.328451	0.523837	0	0	1.28875	1.43486	IL10;IL15RA;TNFSF13;ITGB7;LTBR;ICOSLG;TNFSF13B
	defense response to Gram-negative bacterium (GO:0050829)	18/71	0.00109653	0.0241572	0	0	2.574	17.5433	GSDMD;SLC11A1;SERPINE1;HMGB2;DEFB1;F2;LYZ;PYCARD;SELP;IL23A;IL12B;ROMO1;LBP;DEFB4A;IL6R;TLR4;OPTN;LTF	.	Gap junction	32478	0.332231	0.527162	0	0	1.19204	1.31354	GUCY1A1;MAP2K2;MAPK7;SRC;GNA11;TUBB1;MAPK1;GRB2;PLCB1;RAF1;ADCY6;GNAI2
	positive regulation of multicellular organismal process (GO:0051240)	39/202	0.00110913	0.0243107	0	0	1.81849	12.3733	LRPAP1;DOCK5;NOTCH1;NUMA1;LRP1;SRC;SERPINE1;ENO1;METRNL;ACVR1B;PPM1F;SDCBP;RAB25;HYAL1;GLIPR2;ENPP2;FLOT1;IL12B;CTSH;LBP;LDLR;TAPT1;ACVR1;VDR;SLC11A1;NFAM1;IL18;ABCA7;RAB11A;EREG;CCDC88B;VAMP8;BMP1;IL23A;IL1B;SNAI1;PLCB1;DOCK1;PICALM	.	Thyroid hormone signaling pathway	16/121	0.341045	0.5384	0	0	1.15049	1.23763	NOTCH3;MAP2K2;NOTCH1;THRB;SRC;ITGB3;PIK3CD;ATP1B3;ACTB;MED12;KAT2B;RXRA;MAPK1;RAF1;PLCB1;PLCD1
	positive regulation of myeloid cell differentiation (GO:0045639)	10/29	0.00115483	0.0250338	0	0	3.98293	26.9398	FAM210B;STAT5B;FES;TESC;STAT3;HMGB2;ACVR1B;MAPK14;RAB7B;GATA1	.	Other glycan degradation	44273	0.353751	0.55564	0	0	1.50932	1.56843	GBA;NEU1;MAN2B1
	TRIF-dependent toll-like receptor signaling pathway (GO:0035666)	10/29	0.00115483	0.0250338	0	0	3.98293	26.9398	IKBKB;UBE2D3;UBC;UBE2D1;LY96;RIPK1;FADD;CD14;TANK;TLR4	.	Breast cancer	19/147	0.358776	0.559145	0	0	1.1207	1.14878	NOTCH3;TCF7L2;JUN;CDKN1A;MAP2K2;NOTCH1;GADD45B;FZD4;GADD45A;FLT4;PIK3CD;GADD45G;DDB2;CDK6;E2F2;MAPK1;GRB2;E2F3;RAF1
	positive regulation of intracellular transport (GO:0032388)	13/44	0.00116603	0.0250338	0	0	3.17542	21.4473	TENM1;GSK3A;NUMA1;HIP1R;PRR5L;GAB2;OAZ1;SORL1;OAZ2;EHD1;FGR;EHD2;CAPN10	.	Aldosterone synthesis and secretion	13/98	0.359579	0.559145	0	0	1.15455	1.1809	SCARB1;DAGLA;ATP1B3;CALML4;ADCY6;LIPE;GNA11;ORAI1;DAGLB;PLCB1;CALM2;LDLR;CREB5
	myeloid cell differentiation (GO:0030099)	13/44	0.00116603	0.0250338	0	0	3.17542	21.4473	LYN;CDKN2B;MPIG6B;GATA1;RASGRP4;TIRAP;CASP3;KAT8;HCLS1;JAK2;EVI2B;JAK3;PTPN2	.	Morphine addiction	33573	0.376263	0.579862	0	0	1.14658	1.12074	GABRB1;GNG10;GNG2;GRK2;GNG5;GNG4;GNG7;GNB2;PDE4A;GNG11;ADCY6;GNAI2
	positive regulation of cell proliferation (GO:0008284)	71/424	0.0011711	0.0250338	0	0	1.5334	10.3501	SLC35F6;CDKN1A;FLT3;FLT4;TCIRG1;LAMC1;GLI1;AREG;CXCL5;TNFSF13B;CRKL;CAPNS1;HYAL1;SOX15;RBPMS2;PIM1;PROK2;CTSH;CAPN1;IL6R;RPS9;SPHK1;RHOG;IL18;TBC1D8;SIRT6;NRG1;GAB2;EREG;HCK;IL1B;RARA;HCLS1;LTF;CCL14;HDAC4;CSF1R;NOTCH1;C5AR1;TGFA;DERL2;NOD2;THBS1;TSPAN31;SDCBP;PAK1;RAB25;SERTAD1;NACC2;CXCR2;HMOX1;PTK2B;STX4;ROMO1;STX3;LYN;SRPK2;MAP3K3;INSR;TNFSF13;FN1;OSM;BST1;CDK6;CCPG1;IL7;ACER3;PTPN6;FOLR2;SLC…	.	Prion disease	34/273	0.37663	0.579862	0	0	1.07419	1.04894	RYR1;NDUFB9;NOTCH1;NDUFB7;NCF1;NCF2;NCF4;PIK3CD;NDUFB1;COX7A2;LAMC1;KLC4;PSMD6;C8G;C7;CASP3;TUBB1;MAPK1;RAC1;NDUFV3;ATP5PB;PRKCD;NDUFA2;CYBA;MAPK14;COX6B1;MAPK13;PSMA6;GRIN3A;DDIT3;IL1B;UQCRC1;VDAC1;CREB5
	establishment of protein localization to membrane (GO:0090150)	20/83	0.00118516	0.0252094	0	0	2.40673	16.2163	ATG3;SYS1;NCF1;RAB3IP;ZDHHC7;ZDHHC21;ZDHHC2;ZDHHC3;RAB11A;ZDHHC4;GOLGA7B;SDCBP;ZDHHC18;RAB31;NPC1;RILPL2;PARD3;GOLGA7;OPTN;ATG4D	.	Thermogenesis	29/232	0.382201	0.582944	0	0	1.0786	1.0374	NDUFB9;NDUFB7;PRKAG2;NDUFB1;COX7A2;ACTB;ADCY6;LIPE;SLC25A29;RPS6KA1;NDUFV3;SLC25A20;ATP5ME;CPT1A;COA1;ACSL1;ATP5PB;NDUFA2;ACSL6;SIRT6;MAPK14;COX6B1;MAPK13;NDUFAF5;UQCRC1;GRB2;PPARG;PNPLA2;CREB5
	autophagy of nucleus (GO:0044804)	8/20	0.00119359	0.0252558	0	0	5.04272	33.9415	BECN1;ATG3;ATG9A;ATG2A;WIPI1;WDR45;ATG7;ATG4D	.	Drug metabolism	14/108	0.384781	0.582944	0	0	1.12422	1.07372	CDA;GSTM3;TPMT;MAOA;DPYS;MGST1;MGST2;CYP3A4;FMO5;ALDH3B1;DPYD;HPRT1;UPP1;XDH
	regulation of vesicle-mediated transport (GO:0060627)	29/138	0.00119904	0.0252558	0	0	2.01958	13.5842	TBC1D9B;RAB5C;HIP1;SRC;RAB3D;RAB21;RAB20;OPHN1;RAB25;AP2S1;TBC1D14;MAPK1;STX4;TBC1D12;TBC1D22A;TBC1D10B;PTPN1;MAP2K2;TBC1D8;HIP1R;TBC1D9;RAB11A;TBC1D2;PINK1;FES;RAB13;BMP2K;CHMP3;PICALM	.	Parkinson disease	31/249	0.385335	0.582944	0	0	1.07365	1.02388	NDUFB9;NDUFB7;MAOA;NDUFB1;UBE2L6;COX7A2;CALML4;UBE2L3;GNAI2;KLC4;PSMD6;CASP3;TUBB1;UBC;NDUFV3;DUSP1;ATP5PB;NDUFA2;SEPTIN5;UBE2G1;COX6B1;PSMA6;PINK1;GNAL;ADORA2A;DDIT3;UQCRC1;VDAC1;CALM2;BCL2L1;NFE2L2
	regulation of extrinsic apoptotic signaling pathway via death domain receptors (GO:1902041)	12/39	0.00120698	0.0252996	0	0	3.36472	22.6097	LGALS3;GPX1;SERPINE1;TMBIM1;HMOX1;FAS;RIPK1;STX4;FADD;THBS1;TANK;BCL2L1	.	Notch signaling pathway	21763	0.38613	0.582944	0	0	1.1839	1.12658	LFNG;APH1A;KAT2B;NOTCH3;NOTCH1;CTBP2;NUMB;PSEN1
	negative regulation of protein oligomerization (GO:0032460)	6/12	0.00125975	0.0262783	0	0	7.56017	50.478	SRC;RIOK3;GBA;CLU;SORL1;CRYAB	.	Biosynthesis of unsaturated fatty acids	44313	0.390672	0.586952	0	0	1.31242	1.23353	ACOT7;SCP2;ACAA1;HACD2
	regulation of toll-like receptor 4 signaling pathway (GO:0034143)	7/16	0.00130525	0.0268385	0	0	5.88165	39.0622	LYN;NR1H3;ACOD1;LBP;RAB7B;TIRAP;LTF	.	Alzheimer disease	45/369	0.407883	0.609863	0	0	1.04862	0.940379	RTN3;BECN1;NDUFB9;NDUFB7;LRP1;LPL;PIK3CD;NDUFB1;COX7A2;CALML4;PSEN1;APH1A;IKBKB;KLC4;PSMD6;CASP7;CASP3;TUBB1;CAPN2;MAPK1;FADD;CAPN1;NDUFV3;MAP2K2;FZD4;ATP5PB;INSR;NDUFA2;WIPI1;CSNK1E;COX6B1;TNFRSF1A;PSMA6;DDIT3;IL1B;UQCRC1;ATG2A;FAS;ULK1;VDAC1;PLCB1;RAF1;CALM2;GAPDH;CDK5R1
	negative regulation of lipid storage (GO:0010888)	7/16	0.00130525	0.0268385	0	0	5.88165	39.0622	NFKBIA;ITGB3;NR1H3;PPARG;ABHD5;PTPN2;PNPLA2	.	Tyrosine metabolism	13271	0.4153	0.616694	0	0	1.21713	1.06956	AOC3;AOC2;MAOA;ALDH3B1;COMT
	lipopolysaccharide-mediated signaling pathway (GO:0031663)	7/16	0.00130525	0.0268385	0	0	5.88165	39.0622	LYN;HCK;IRAK1;IL1B;IL18;LBP;TLR4	.	Longevity regulating pathway	13/102	0.416417	0.616694	0	0	1.10241	0.965784	INSR;PIK3CD;PRKAG2;ADIPOR1;SOD2;ADCY6;STK11;SESN2;EIF4EBP1;ULK1;PPARG;CRYAB;CREB5
	enzyme linked receptor protein signaling pathway (GO:0007167)	26/120	0.00132033	0.0270198	0	0	2.09866	13.9139	CSF1R;FLT3;SRC;FLT4;ACVR1B;RASGRP4;PTPRG;PDZD3;IRAK1;PTK2B;JAK2;JAK3;MPZL1;LYN;TNK2;TNK1;PILRA;TYK2;BMX;ACVR2B;FGR;HCK;TEC;FES;GRB2;LCP2	.	Alanine, aspartate and glutamate metabolism	13636	0.43942	0.647675	0	0	1.17903	0.969518	GPT2;ADSS2;GLUL;ASRGL1;ASS1
	regulation of lamellipodium assembly (GO:0010591)	9/25	0.00143399	0.0290703	0	0	4.25566	27.863	CAPZB;AUTS2;TWF2;WAS;PLXNB3;BRK1;RAC1;WASF2;SSH3	.	Linoleic acid metabolism	44315	0.445754	0.653619	0	0	1.20729	0.975477	CYP2J2;PLA2G4F;PLA2G4A;CYP3A4
	positive regulation of interleukin-1 beta secretion (GO:0050718)	9/25	0.00143399	0.0290703	0	0	4.25566	27.863	PYCARD;GSDMD;ORM1;NLRP12;CASP1;NOD2;NLRP1;LGALS9;TLR4	.	Chemical carcinogenesis	29/239	0.447794	0.653619	0	0	1.04222	0.837346	SRC;MGST1;MGST2;PIK3CD;CYP3A4;ADCY6;GNAI2;SULT1A1;CCND3;RXRA;RPS6KA1;EIF4EBP1;MAPK1;JAK2;STAT5A;GSTM3;STAT5B;JUN;HSP90AA1;MAP2K2;VDR;STAT3;EPHX1;EPHX3;KLF4;BCL6;GRB2;RAF1;CREB5
	extrinsic apoptotic signaling pathway (GO:0097191)	17/67	0.00147547	0.0297715	0	0	2.57619	16.7936	GSK3A;SORT1;ACVR1B;TANK;GABARAP;TNFRSF1A;DEDD2;BAG3;CASP3;FAS;RIPK1;FADD;JAK2;IL6R;BCL2L2;MCL1;BCL2L1	.	Dilated cardiomyopathy	35400	0.450673	0.653619	0	0	1.07802	0.859199	TPM4;ITGB3;ITGA2;ITGA2B;TPM1;ITGB7;DMD;CACNA2D4;ACTB;SLC8A1;ADCY6;ITGA9
	cellular defense response (GO:0006968)	15/56	0.0015311	0.0304708	0	0	2.77111	17.9617	LGALS3BP;BECN1;NCF1;NCF2;C5AR1;LY96;LSP1;TCIRG1;TYROBP;ADORA2A;ADORA2B;CLEC5A;CXCR2;PTK2B;LBP	.	Cushing syndrome	19/155	0.451859	0.653619	0	0	1.05429	0.837514	SCARB1;TCF7L2;CDKN1A;CDKN2B;MAP2K2;FZD4;ADCY6;GNAI2;CDK6;GNA11;WDR5B;ORAI1;E2F2;MAPK1;E2F3;PLCB1;LDLR;KCNK2;CREB5
	regulation of release of cytochrome c from mitochondria (GO:0090199)	12/40	0.00154297	0.0304708	0	0	3.24437	21.0042	PYCARD;PRELID1;PINK1;GPX1;BIK;BNIP3;PLAUR;NOL3;CLU;MMP9;BBC3;BCL2L1	.	Calcium signaling pathway	29/240	0.457214	0.656636	0	0	1.03723	0.811737	RET;RYR1;FLT4;PTAFR;CALML4;SLC8A1;MYLK;HTR7;HRH2;GNA11;PTK2B;SPHK2;SPHK1;TACR3;MCOLN1;PHKA2;TPCN2;ITPKC;GNAL;P2RX4;ADORA2A;ASPH;ADORA2B;P2RX1;ORAI1;VDAC1;PLCB1;CALM2;PLCD1
	regulation of intracellular transport (GO:0032386)	12/40	0.00154297	0.0304708	0	0	3.24437	21.0042	LYN;PTPN1;PINK1;NUMA1;LAMP1;FES;CAPN10;STXBP2;LCP1;CRYAB;UNC13D;NDEL1	.	Basal cell carcinoma	23224	0.460279	0.656636	0	0	1.09755	0.851613	TCF7L2;CDKN1A;GADD45B;FZD4;GADD45A;GLI1;DDB2;GADD45G
	JAK-STAT cascade (GO:0007259)	12/40	0.00154297	0.0304708	0	0	3.24437	21.0042	LYN;IFNAR2;STAT5A;PTPN1;STAT5B;STAT2;STAT3;MAPK1;PKD2;SOCS6;JAK2;JAK3	.	Cytosolic DNA-sensing pathway	23224	0.460279	0.656636	0	0	1.09755	0.851613	IKBKB;PYCARD;NFKBIA;IL1B;CASP1;IL18;POLR1D;RIPK1
	positive regulation of cytokine secretion (GO:0050715)	18/73	0.00154542	0.0304708	0	0	2.48012	16.0525	FCN1;IL10;PTGER4;CSF1R;ORM1;CADM1;LPL;MAPK14;PRKCZ;PYCARD;FGR;FFAR2;MBP;LGALS9;CD14;GAPDH;CD244;TLR2	.	Regulation of lipolysis in adipocytes	20271	0.467974	0.664566	0	0	1.10037	0.83556	LIPE;INSR;PIK3CD;ABHD5;ADCY6;GNAI2;PNPLA2
	Fc-gamma receptor signaling pathway (GO:0038094)	28/134	0.00157771	0.0307171	0	0	2.0046	12.9332	SRC;ARPC1B;WAS;BRK1;ACTB;NCKIPSD;PAK1;MAPK1;RAC1;FCGR1A;WASF2;LYN;ACTR3;HSP90AA1;FCER1G;PRKCD;ARPC4;ARPC5;BAIAP2;VAV1;FGR;HCK;FCGR2A;ARPC3;ELMO2;GRB2;FCGR2B;DOCK1	.	cAMP signaling pathway	26/216	0.47097	0.66578	0	0	1.03261	0.777517	GRIA1;PIK3CD;CALML4;GLI1;ADCY6;GNAI2;LIPE;PAK1;PDE4A;MAPK1;FFAR2;RAC1;JUN;MAP2K2;ARAP3;ATP1B3;RHOA;VAV1;NFKBIA;GRIN3A;ADORA2A;ORAI1;RAF1;MYL9;CALM2;CREB5
	carbohydrate catabolic process (GO:0016052)	11/35	0.00157925	0.0307171	0	0	3.46897	22.3777	HK3;LDHA;PKM;PGAM1;NEU1;PGK1;NAGA;MAN2B1;ALDOA;HK1;DERA	.	Carbohydrate digestion and absorption	17319	0.476699	0.670829	0	0	1.10417	0.81805	HK3;MGAM;PIK3CD;ATP1B3;PLCB1;HK1
	sulfur compound catabolic process (GO:0044273)	11/35	0.00157925	0.0307171	0	0	3.46897	22.3777	GGT5;GALNS;VCAN;NUDT7;HYAL1;GPC1;CTH;BGN;GGT1;ARSB;SGSH	.	Gastric cancer	18/149	0.481014	0.673852	0	0	1.03677	0.758774	TCF7L2;CDKN1A;CDKN2B;MAP2K2;GADD45B;FZD4;GADD45A;PIK3CD;GADD45G;DDB2;RXRA;CTNNA1;E2F2;MAPK1;GRB2;CTNNA3;E2F3;RAF1
	peptidyl-tyrosine phosphorylation (GO:0018108)	19/79	0.00159197	0.0308257	0	0	2.40009	15.4633	LYN;CSF1R;FLT3;SRC;FLT4;INSR;TNK2;TNK1;TYK2;BMX;FGR;HCK;TEC;FES;PTK2B;PTPN6;GRB2;JAK2;JAK3	.	Glucagon signaling pathway	13/107	0.487575	0.679981	0	0	1.04347	0.749538	CPT1A;PGAM1;PRKAG2;CALML4;PHKA2;LDHB;GYS1;LDHA;PPP4C;PKM;PLCB1;CALM2;CREB5
	positive regulation of neuron projection development (GO:0010976)	22/97	0.00162115	0.030974	0	0	2.22422	14.2898	CPNE9;SCARB2;LYN;RET;SYT4;UNC13A;CPNE5;SMURF1;AVIL;TWF2;VLDLR;RHOA;SNX3;FES;PLXNA2;PLXNB3;PLXNB2;PTK2B;S100A9;SCARF1;ARSB;MARK2	.	Adrenergic signaling in cardiomyocytes	18/150	0.492956	0.684417	0	0	1.02886	0.72775	TPM4;TPM1;CREM;PPP2R5A;ATP1B3;CALML4;CACNA2D4;MAPK14;SLC8A1;ADCY6;PIK3R5;GNAI2;MAPK13;PPP2R3C;MAPK1;PLCB1;CALM2;CREB5
	antigen processing and presentation of exogenous peptide antigen (GO:0002478)	22/97	0.00162115	0.030974	0	0	2.22422	14.2898	DCTN5;ARF1;FCER1G;DCTN2;DCTN4;CLTA;AP2A1;AP2A2;CTSS;DNM2;CAPZB;CAPZA2;AP1S2;AP2S1;CTSF;FCGR2B;CTSD;RILP;ACTR10;AP1M2;LGMN;RAB7A	.	Cortisol synthesis and secretion	23955	0.496771	0.685131	0	0	1.05892	0.740846	SCARB1;GNA11;ORAI1;PLCB1;LDLR;KCNK2;ADCY6;CREB5
	antigen processing and presentation of exogenous peptide antigen via MHC class II (GO:0019886)	22/97	0.00162115	0.030974	0	0	2.22422	14.2898	DCTN5;ARF1;FCER1G;DCTN2;DCTN4;CLTA;AP2A1;AP2A2;CTSS;DNM2;CAPZB;CAPZA2;AP1S2;AP2S1;CTSF;FCGR2B;CTSD;RILP;ACTR10;AP1M2;LGMN;RAB7A	.	Valine, leucine and isoleucine degradation	17685	0.497877	0.685131	0	0	1.07782	0.751676	ACAA2;HIBADH;ALDH2;AUH;ACAA1;ALDH9A1
	regulation of signal transduction (GO:0009966)	43/233	0.00162867	0.0309807	0	0	1.72041	11.045	RET;SCARB2;CD63;GALNT11;CSF1R;FLT3;SRC;FLT4;PXN;NLRC4;GLI1;SAMSN1;CLU;RASGRP4;SNX3;LFNG;RGS2;NCLN;IRAK1;IRAK2;GNG4;GNG7;CD36;CD55;ACVR1;GIT2;PTPN1;MPIG6B;INSR;LMTK2;FUZ;SYNJ2BP;SENP2;MERTK;DHRS3;BST1;NLRP12;ROR2;CD24;PLCB1;RAF1;NAIP;PTPN2	.	Mannose type O-glycan biosynthesis	44278	0.515124	0.696537	0	0	1.13167	0.750692	B4GALT1;LARGE1;ST3GAL3
	positive regulation of catabolic process (GO:0009896)	16/62	0.00166034	0.0314444	0	0	2.63495	16.8656	GSK3A;EGLN2;LRP1;SMURF1;PLK2;TNFSF12;WWP2;OAZ1;SORL1;OAZ2;IL1B;HECW2;STX5;RILP;ATG7;RAB7A	.	Protein export	44278	0.515124	0.696537	0	0	1.13167	0.750692	SRPRA;SEC62;SEC11A
	positive regulation of actin filament polymerization (GO:0030838)	14/51	0.00168355	0.0316068	0	0	2.8654	18.3009	VASP;TENM1;CARMIL1;GSN;RHOG;WAS;ARPC4;BAIAP2;PYCARD;HCK;CDC42EP4;CDC42EP3;PTK2B;RAC1	.	Proximal tubule bicarbonate reclamation	44278	0.515124	0.696537	0	0	1.13167	0.750692	CA4;ATP1B3;SLC25A10
	peptidyl-tyrosine modification (GO:0018212)	14/51	0.00168355	0.0316068	0	0	2.8654	18.3009	LYN;CSF1R;FLT3;SRC;FLT4;INSR;FGR;HCK;TEC;FES;PTK2B;PTPN6;JAK2;JAK3	.	Renin-angiotensin system	44278	0.515124	0.696537	0	0	1.13167	0.750692	ACE2;ACE;KLK1
	positive regulation of lamellipodium organization (GO:1902745)	8/21	0.00173185	0.0322332	0	0	4.65456	29.5963	CARMIL1;AUTS2;SRC;TWF2;ENPP2;BRK1;RAC1;WASF2	.	Cocaine addiction	18050	0.518751	0.698405	0	0	1.0527	0.690918	JUN;GRIN3A;MAOA;CREB5;GNAI2;CDK5R1
	regulation of interleukin-17 production (GO:0032660)	8/21	0.00173185	0.0322332	0	0	4.65456	29.5963	IL23A;IL18;IL12B;SLAMF6;NOD2;LY9;TLR4;MYD88	.	Thyroid hormone synthesis	27638	0.521594	0.699206	0	0	1.02875	0.669578	GPX1;TG;PAX8;GPX3;GSR;ATP1B3;PLCB1;ADCY6;CREB5
	negative regulation of cysteine-type endopeptidase activity involved in apoptotic process (GO:0043154)	17/68	0.00175639	0.0324107	0	0	2.52553	16.0232	CDKN2D;GPX1;SRC;PLAUR;NLRC4;TNFRSF1B;NOL3;KLF4;MMP9;THBS1;SH3RF1;RPS6KA1;SFN;RAF1;NAIP;CD44;LAMTOR5	.	Caffeine metabolism	44202	0.526223	0.699382	0	0	1.50889	0.968752	XDH
	regulation of actin filament polymerization (GO:0030833)	17/68	0.00175639	0.0324107	0	0	2.52553	16.0232	VASP;TENM1;CARMIL1;PRKCD;RHOG;TWF2;HIP1R;ARHGAP28;BAIAP2;PYCARD;FCHSD1;HCK;CDC42EP4;CDC42EP3;HCLS1;PTK2B;RAC1	.	Vitamin B6 metabolism	44202	0.526223	0.699382	0	0	1.50889	0.968752	PDXK
	Fc receptor mediated stimulatory signaling pathway (GO:0002431)	28/135	0.00177274	0.0325731	0	0	1.98575	12.5802	SRC;ARPC1B;WAS;BRK1;ACTB;NCKIPSD;PAK1;MAPK1;RAC1;FCGR1A;WASF2;LYN;ACTR3;HSP90AA1;FCER1G;PRKCD;ARPC4;ARPC5;BAIAP2;VAV1;FGR;HCK;FCGR2A;ARPC3;ELMO2;GRB2;FCGR2B;DOCK1	.	Long-term potentiation	24685	0.532505	0.704719	0	0	1.02291	0.644598	GRIA1;MAP2K2;RPS6KA1;MAPK1;CALML4;PLCB1;RAF1;CALM2
	negative regulation of heterotypic cell-cell adhesion (GO:0034115)	5/9	0.00183446	0.0331431	0	0	9.44724	59.5271	IL10;IL1RN;MAPK7;MBP;KLF4	.	N-Glycan biosynthesis	18415	0.539276	0.710657	0	0	1.02871	0.635258	DPM2;DPM3;B4GALT1;MAN2A2;SRD5A3;MGAT3
	regulation of cell-cell adhesion involved in gastrulation (GO:0070587)	5/9	0.00183446	0.0331431	0	0	9.44724	59.5271	IL10;IL1RN;MAPK7;MBP;KLF4	.	Vitamin digestion and absorption	44279	0.544852	0.713051	0	0	1.07772	0.654437	SLC5A6;SCARB1;TCN2
	regulation of mast cell activation involved in immune response (GO:0033006)	5/9	0.00183446	0.0331431	0	0	9.44724	59.5271	LYN;FES;CD300A;STXBP2;UNC13D	.	MicroRNAs in cancer	36/310	0.546996	0.713051	0	0	0.990959	0.597859	HDAC4;NOTCH3;HDAC5;CDKN1A;NOTCH1;ITGB3;PIK3CD;THBS1;CRKL;IKBKB;MAPK7;PLAU;CASP3;PIM1;HMOX1;E2F2;MAPK1;E2F3;MCL1;ST14;MAP2K2;STAT3;TPM1;MIR21;MMP9;RHOA;MIR223;MARCKS;CDK6;DDIT4;GRB2;VIM;ZFPM2;RAF1;CD44;BCL2L2
	regulation of cysteine-type endopeptidase activity involved in apoptotic signaling pathway (GO:2001267)	5/9	0.00183446	0.0331431	0	0	9.44724	59.5271	GSN;PLAUR;FAS;LGALS9;MMP9	.	TGF-beta signaling pathway	34639	0.548213	0.713051	0	0	0.999721	0.600924	ACVR1;SMAD1;CDKN2B;ZFYVE9;SMURF1;ID1;MAPK1;ACVR1B;THBS1;ACVR2B;RHOA
	positive regulation of stress-activated MAPK cascade (GO:0032874)	19/80	0.00186286	0.0332548	0	0	2.36061	14.838	NCF1;GADD45B;GADD45A;FLT4;CARD9;NOD2;TIRAP;GADD45G;PYCARD;SDCBP;IL1B;ARL6IP5;PTK2B;RIPK1;LTBR;PLCB1;FCGR2B;XDH;MAP3K11	.	Base excision repair	12145	0.550264	0.713051	0	0	1.04053	0.621569	POLB;SMUG1;POLD4;PARP3
	regulation of protein serine/threonine kinase activity (GO:0071900)	19/80	0.00186286	0.0332548	0	0	2.36061	14.838	CDKN2D;CSF1R;CDKN1A;CDKN2B;MAP2K2;RALB;SRC;GADD45A;PARP16;THY1;RHOA;PYCARD;STK11;SERTAD1;HGS;TRIB1;CALM2;LTF;CDK5R1	.	Protein digestion and absorption	12/103	0.552658	0.71318	0	0	0.994701	0.589875	ACE2;COL26A1;SLC7A7;SLC7A8;ELN;SLC1A1;COL6A3;ATP1B3;SLC3A2;SLC1A5;SLC8A1;PGA5
	antigen processing and presentation of peptide antigen via MHC class II (GO:0002495)	22/98	0.00186375	0.0332548	0	0	2.19483	13.7949	DCTN5;ARF1;FCER1G;DCTN2;DCTN4;CLTA;AP2A1;AP2A2;CTSS;DNM2;CAPZB;CAPZA2;AP1S2;AP2S1;CTSF;FCGR2B;CTSD;RILP;ACTR10;AP1M2;LGMN;RAB7A	.	Cell adhesion molecules	17/148	0.571385	0.733969	0	0	0.978755	0.547802	SELPLG;SDC4;CADM1;SDC3;ITGB2;ICAM3;F11R;SELE;SELP;VCAN;SELL;ITGB7;ICOSLG;MPZL1;NECTIN2;ITGA9;JAM3
	activation of MAPK activity (GO:0000187)	25/117	0.00198183	0.0350385	0	0	2.06116	12.8281	C5AR1;TGFA;NOD1;NOD2;THBS1;IRAK1;IRAK2;UBC;MAP3K20;PROK2;MAPK1;RIPK1;MAP3K6;MAP2K4;MAP2K2;DBNL;INSR;NRG1;MAPK14;MAPKAPK3;ADORA2B;IL1B;MAPKAPK2;TLR4;MAP3K11	.	alpha-Linolenic acid metabolism	44280	0.573487	0.733969	0	0	1.02868	0.571965	PLA2G4F;PLA2G4A;ACAA1
	iron ion homeostasis (GO:0055072)	16/63	0.00198782	0.0350385	0	0	2.57874	16.0416	ATP6AP1;HFE;SLC11A1;SLC40A1;SLC25A37;FTH1;UBC;LCN2;HMOX1;ACO1;ATP6V0D1;FBXL5;ISCU;HMOX2;FTL;PICALM	.	Wnt signaling pathway	19/166	0.577746	0.73639	0	0	0.974787	0.534788	TCF7L2;JUN;CTBP2;FZD4;SIAH1;PRICKLE3;CSNK1E;PSEN1;SENP2;RHOA;CCND3;DAAM2;ROR2;RAC1;TBL1X;BTRC;PLCB1;LGR6;PPARD
	regulation of lamellipodium organization (GO:1902743)	7/17	0.00199617	0.0350385	0	0	5.29319	32.9052	CARMIL1;CAPZB;TWF2;WAS;RAC1;SSH3;CD44	.	Nitrogen metabolism	44244	0.608109	0.771926	0	0	1.00579	0.500279	CA4;GLUL
	nucleobase-containing compound biosynthetic process (GO:0034654)	7/17	0.00199617	0.0350385	0	0	5.29319	32.9052	CDA;PNP;GMPR;AMPD2;AMPD3;HPRT1;DCK	.	ABC transporters	16558	0.618449	0.77892	0	0	0.942798	0.453053	ABCA6;ABCA3;ABCA9;DEFB1;ABCA7
	regulation of protein binding (GO:0043393)	24/111	0.00204202	0.0354807	0	0	2.09212	12.9582	HDAC4;LRPAP1;HDAC5;TCF7L2;RALB;LRP1;HFE;AKTIP;PRKCD;PLK1;CTSZ;HIP1R;NRG1;CSNK1E;PSEN1;SPPL3;SORL1;ACTB;STK3;FLOT1;TMBIM6;MITD1;CD36;DISC1	.	Bile secretion	33147	0.618628	0.77892	0	0	0.942675	0.452721	SCARB1;RXRA;SCT;AQP9;SLCO1B3;EPHX1;ATP1B3;CYP3A4;LDLR;ADCY6
	regulation of cytokine secretion (GO:0050707)	10/31	0.00205423	0.0354807	0	0	3.6032	22.296	PTGER4;IL10;SRGN;FGR;NLRP12;PPP1R11;CADM1;C5AR2;FCGR2B;GAPDH	.	Mucin type O-glycan biosynthesis	13241	0.621345	0.779187	0	0	0.942822	0.44866	GALNT11;B3GNT3;GALNTL5;ST6GALNAC4
	proton transport (GO:0015992)	10/31	0.00205423	0.0354807	0	0	3.6032	22.296	ATP6V0B;ATP6V0E1;ATP6AP1;UCP2;ATP6V1B2;TCIRG1;ATP6V1E1;ATP6V0D1;ATP6V1C1;ATP6V1F	.	Riboflavin metabolism	44204	0.630675	0.782168	0	0	1.07766	0.496762	BLVRB
	positive regulation of protein dephosphorylation (GO:0035307)	10/31	0.00205423	0.0354807	0	0	3.6032	22.296	PPP1R15A;PTPA;CD300A;SMPD1;DLC1;GBA;PRKCD;PPP2R5A;SPPL3;CALM2	.	Sulfur relay system	44204	0.630675	0.782168	0	0	1.07766	0.496762	MOCS2
	positive regulation of plasma membrane bounded cell projection assembly (GO:0120034)	17/69	0.00208091	0.0357983	0	0	2.47682	15.2943	TENM1;AUTS2;TWF2;BRK1;FUZ;ARAP1;DEF8;CDC42EP4;CDC42EP3;NEURL1;PLEKHM1;RAC1;WASHC1;WASF2;TAPT1;RHOQ;NDEL1	.	Progesterone-mediated oocyte maturation	11/100	0.63335	0.782168	0	0	0.932006	0.425677	HSP90AA1;RPS6KA1;PLK1;PIK3CD;MAPK1;RAF1;MAPK14;ADCY6;CPEB4;GNAI2;MAPK13
	multivesicular body sorting pathway (GO:0071985)	6/13	0.00210872	0.03599	0	0	6.47978	39.9263	LAPTM4B;SORT1;CHMP3;RAB27B;RILP;CHMP5	.	GnRH secretion	23559	0.633782	0.782168	0	0	0.926156	0.422374	TRPC5;MAP2K2;GNA11;PIK3CD;MAPK1;PLCB1;RAF1
	diacylglycerol metabolic process (GO:0046339)	6/13	0.00210872	0.03599	0	0	6.47978	39.9263	PGS1;DAGLA;DGAT2;DGKD;DAGLB;DGKZ	.	Fatty acid biosynthesis	44245	0.639904	0.784114	0	0	0.942871	0.420933	ACSL1;ACSL6
	glycosaminoglycan biosynthetic process (GO:0006024)	22/99	0.00213653	0.0363209	0	0	2.1662	13.3191	CEMIP;B4GALT1;SDC4;CHPF2;SDC3;BGN;HS3ST6;HS6ST1;HS6ST2;VCAN;CHSY1;HYAL1;IL1B;GPC1;UST;DSE;CHST15;ST3GAL4;B3GNT3;GPC3;B4GALT4;ST3GAL3	.	Hippo signaling pathway	18/163	0.640402	0.784114	0	0	0.935924	0.417103	SMAD1;TCF7L2;FZD4;SERPINE1;ITGB2;CSNK1E;PRKCZ;AREG;ACTB;STK3;BBC3;CCND3;PAK1;PARD3;ID1;CTNNA1;CTNNA3;BTRC
	cellular response to interleukin-1 (GO:0071347)	30/150	0.00224896	0.0376313	0	0	1.89734	11.5686	CCL14;IL1RN;CXCL8;PELI2;NOD1;IL1RAP;NOD2;TANK;PYCARD;IKBKB;PSMD6;IRAK1;IRAK2;HYAL1;UBC;BTRC;CCL16;ADAMTS7;MAP3K3;IL1R1;IL1R2;ACOD1;IRAK4;MAPK13;NFKBIA;PSMA6;TNIP2;IL1B;PLCB1;MYD88	.	Phototransduction	44283	0.652322	0.795577	0	0	0.905081	0.386666	CALML4;GNAT1;CALM2
	protein repair (GO:0030091)	4/6	0.00230947	0.0376313	0	0	15.1108	91.7338	PCMT1;MSRA;MSRB3;MSRB1	.	Pancreatic secretion	11/102	0.659789	0.801541	0	0	0.911418	0.379	BST1;SCT;RAB3D;ATP1B3;RAB27B;RAC1;PLCB1;RHOA;ADCY6;RAB11A;TPCN2
	lipoxin biosynthetic process (GO:2001301)	4/6	0.00230947	0.0376313	0	0	15.1108	91.7338	ALOX5;ALOX5AP;ALOX12;LTC4S	.	Steroid biosynthesis	44247	0.697331	0.842304	0	0	0.838012	0.3021	SOAT1;TM7SF2
	glomerular epithelial cell differentiation (GO:0072311)	4/6	0.00230947	0.0376313	0	0	15.1108	91.7338	BASP1;PTPRO;CD24;KLF15	.	Citrate cycle (TCA cycle)	44285	0.69876	0.842304	0	0	0.837943	0.300358	PC;IDH1;ACO1
	renal filtration cell differentiation (GO:0061318)	4/6	0.00230947	0.0376313	0	0	15.1108	91.7338	BASP1;PTPRO;CD24;KLF15	.	Cardiac muscle contraction	32021	0.70278	0.843879	0	0	0.869887	0.306819	TPM4;ASPH;TPM1;UQCRC1;ATP1B3;COX7A2;CACNA2D4;SLC8A1;COX6B1
	regulation of NK T cell activation (GO:0051133)	4/6	0.00230947	0.0376313	0	0	15.1108	91.7338	HSPH1;IL23A;CD300A;IL12B	.	Amphetamine addiction	25385	0.711842	0.851472	0	0	0.851225	0.289331	GRIA1;JUN;GRIN3A;MAOA;CALML4;CALM2;CREB5
	cellular response to bacterial lipopeptide (GO:0071221)	4/6	0.00230947	0.0376313	0	0	15.1108	91.7338	CD14;CD36;TIRAP;TLR2	.	Viral myocarditis	22068	0.71861	0.854826	0	0	0.837735	0.276818	CASP3;ITGB2;DMD;RAC1;ACTB;CD55
	regulation of lysosomal protein catabolic process (GO:1905165)	4/6	0.00230947	0.0376313	0	0	15.1108	91.7338	LAPTM4B;LRP1;GBA;LDLR	.	Circadian rhythm	44286	0.720143	0.854826	0	0	0.807971	0.265261	PRKAG2;CSNK1E;BTRC
	sterol import (GO:0035376)	4/6	0.00230947	0.0376313	0	0	15.1108	91.7338	SCARB1;STARD5;CD36;LDLR	.	Systemic lupus erythematosus	14/135	0.724678	0.856938	0	0	0.87202	0.280815	IL10;H2AC6;H2BC5;ACTN1;H2AC4;ACTN4;MACROH2A1;H2AJ;C8G;FCGR2A;C7;H3C12;FCGR1A;H3-3B
	cholesterol import (GO:0070508)	4/6	0.00230947	0.0376313	0	0	15.1108	91.7338	SCARB1;STARD5;CD36;LDLR	.	Porphyrin and chlorophyll metabolism	15797	0.757327	0.890061	0	0	0.77329	0.214944	HMOX1;BLVRB;HMOX2;BLVRA
	negative regulation of cellular response to hypoxia (GO:1900038)	4/6	0.00230947	0.0376313	0	0	15.1108	91.7338	HYOU1;TMBIM6;ENO1;NOL3	.	Melanogenesis	10/101	0.758412	0.890061	0	0	0.828207	0.229023	TCF7L2;MAP2K2;FZD4;MAPK1;CALML4;RAF1;PLCB1;CALM2;ADCY6;GNAI2
	positive regulation of intracellular signal transduction (GO:1902533)	77/479	0.00236453	0.0382751	0	0	1.46	8.82889	RET;ECM1;HIP1;NCF1;FLT3;FLT4;PIK3CD;LITAF;IKBKB;TFG;CASP1;LGALS9;JAK2;WLS;IL18;SHISA5;LMTK2;NRG1;ACTN4;IRAK4;TNFRSF1B;TIRAP;RHOA;VAV1;TNFRSF1A;EREG;FGR;HCLS1;CHI3L1;S100A4;RBCK1;ROR2;S100A9;S100A8;LTF;CSF1R;BECN1;RAMP3;SRC;PELI2;NOD1;NOD2;THBS1;PIK3R5;RASD2;IRAK1;UBC;S100A12;HMOX1;RIPK1;CD14;FADD;LYN;MAP3K3;TCF7L2;SEMA4D;PLK2;NEK6;INSR;CARD9;SIAH1;OSM;MERTK;SELP;PINK1;P2RX4;TNIP2;FAS;LAMTOR2;PTPN…	.	Lysine degradation	23163	0.761727	0.890591	0	0	0.793508	0.215966	ALDH2;PLOD3;PLOD1;COLGALT1;EZH1;ALDH9A1
	positive regulation of JAK-STAT cascade (GO:0046427)	16/64	0.00236752	0.0382751	0	0	2.52487	15.2652	LYN;CSF1R;NOTCH1;FLT3;STAT3;IL18;OSM;F2;TNFRSF1A;SOCS3;IL23A;IL12B;HCLS1;PTK2B;JAK2;IL6R	.	Salivary secretion	34213	0.774732	0.898539	0	0	0.807477	0.206098	CST3;BST1;GUCY1A1;ATP1B3;CALML4;PLCB1;LYZ;CALM2;ADCY6
	response to endoplasmic reticulum stress (GO:0034976)	23/106	0.00238444	0.0382751	0	0	2.10115	12.6884	PPP1R15A;JUN;CEBPB;CXCL8;DNAJB12;SELENOK;RNF5;TANK;THBS1;BBC3;HERPUD1;ERP44;OS9;TMEM259;TMEM33;DDIT3;CASP4;FLOT1;DNAJB9;HYOU1;P4HB;ATF3;UBXN6	.	Pentose and glucuronate interconversions	12479	0.777193	0.898539	0	0	0.729656	0.183922	UGP2;CRYL1;XYLB
	fatty acid metabolic process (GO:0006631)	23/106	0.00238444	0.0382751	0	0	2.10115	12.6884	SCARB2;GGT5;STAT5A;STAT5B;PHYH;CPT1A;ACOT7;GPX1;GPX4;ACSL1;LPL;ALOX12;ADIPOR1;LTC4S;PLA2G15;NUDT7;ALOX5;ALOX5AP;GGT1;ACAA1;LPIN2;LPIN3;PPARD	.	Propanoate metabolism	12479	0.777193	0.898539	0	0	0.729656	0.183922	LDHB;LDHA;ACSS2
	peptidyl-S-diacylglycerol-L-cysteine biosynthetic process from peptidyl-cysteine (GO:0018231)	8/22	0.00244495	0.0383902	0	0	4.32184	25.9904	GOLGA7B;ZDHHC18;ZDHHC21;ZDHHC7;ZDHHC2;GOLGA7;ZDHHC3;ZDHHC4	.	Cell cycle	12/124	0.7981	0.912424	0	0	0.807229	0.182048	CDKN2D;CCND3;CDKN1A;CDKN2B;CDK6;GADD45B;GADD45A;PLK1;E2F2;SFN;E2F3;GADD45G
	peptidyl-L-cysteine S-palmitoylation (GO:0018230)	8/22	0.00244495	0.0383902	0	0	4.32184	25.9904	GOLGA7B;ZDHHC18;ZDHHC21;ZDHHC7;ZDHHC2;GOLGA7;ZDHHC3;ZDHHC4	.	Spinocerebellar ataxia	14/143	0.798509	0.912424	0	0	0.817568	0.18396	GRIA1;RYR1;BECN1;GTF2B;PIK3CD;WIPI1;VLDLR;PSMA6;PSMD6;GRIN3A;ATG2A;ULK1;VDAC1;PLCB1
	STAT cascade (GO:0097696)	8/22	0.00244495	0.0383902	0	0	4.32184	25.9904	STAT5A;IFNAR2;STAT5B;STAT2;STAT3;PKD2;SOCS6;JAK2	.	Hedgehog signaling pathway	20576	0.800013	0.912424	0	0	0.738987	0.164888	GRK2;SMURF1;CSNK1E;GLI1;BTRC
	regulation of bone resorption (GO:0045124)	8/22	0.00244495	0.0383902	0	0	4.32184	25.9904	CSF1R;DCSTAMP;ATP6AP1;SRC;BGLAP;ITGB3;PLEKHM1;DEF8	.	Metabolism of xenobiotics by cytochrome P450	27942	0.800938	0.912424	0	0	0.764564	0.169711	GSTM3;AKR7A2;ALDH3B1;EPHX1;MGST1;MGST2;CYP3A4
	glucose transport (GO:0015758)	8/22	0.00244495	0.0383902	0	0	4.32184	25.9904	SLC2A9;SORT1;SLC2A13;SLC2A3;PPBP;SLC2A6;SLC2A8;PPARD	.	Allograft rejection	13940	0.838001	0.947498	0	0	0.64612	0.114193	IL10;IL12B;FAS
	regulation of interferon-gamma-mediated signaling pathway (GO:0060334)	8/22	0.00244495	0.0383902	0	0	4.32184	25.9904	SOCS3;IFNGR1;IFNGR2;NLRC5;NR1H3;PPARG;JAK2;PTPN2	.	Oocyte meiosis	12/129	0.838873	0.947498	0	0	0.772512	0.135727	RPS6KA1;PLK1;PPP2R5A;MAPK1;CALML4;BTRC;MAPK14;CALM2;ADCY6;REC8;CPEB4;MAPK13
	response to interleukin-1 (GO:0070555)	18/76	0.0025038	0.0391718	0	0	2.35143	14.085	CCL14;HDAC4;CXCL8;IL1R1;SRC;ACOD1;TANK;SELE;MAPK13;PYCARD;IRAK1;HYAL1;IRAK2;CHI3L1;LGALS9;CCL16;MYD88;ADAMTS7	.	Ether lipid metabolism	17989	0.840867	0.947498	0	0	0.669957	0.116118	PLA2G4F;LPCAT2;ENPP2;PLA2G4A
	positive regulation of myeloid leukocyte differentiation (GO:0002763)	10/32	0.00267872	0.0417571	0	0	3.43922	20.3685	CCR1;DCSTAMP;IL23A;OCSTAMP;TESC;IL12B;HCLS1;RIPK1;FADD;EVI2B	.	Various types of N-glycan biosynthesis	14305	0.850759	0.955185	0	0	0.628137	0.101523	B4GALT1;MAN2A2;ST3GAL3
	interleukin-1-mediated signaling pathway (GO:0070498)	21/95	0.00284801	0.0442364	0	0	2.15101	12.6073	MAP3K3;IL1RN;IL1R1;IL1R2;PELI2;NOD1;IL1RAP;IRAK4;NOD2;IKBKB;NFKBIA;PSMA6;PSMD6;IRAK1;IRAK2;TNIP2;IL1B;UBC;BTRC;PLCB1;MYD88	.	Nicotine addiction	14671	0.862633	0.965031	0	0	0.611125	0.0903038	GRIA1;GABRB1;GRIN3A
	Fc-gamma receptor signaling pathway involved in phagocytosis (GO:0038096)	27/133	0.00291467	0.0448467	0	0	1.93217	11.28	SRC;ARPC1B;WAS;BRK1;ACTB;NCKIPSD;PAK1;MAPK1;RAC1;FCGR1A;WASF2;LYN;ACTR3;HSP90AA1;PRKCD;ARPC4;ARPC5;BAIAP2;VAV1;FGR;HCK;FCGR2A;ARPC3;ELMO2;GRB2;FCGR2B;DOCK1	.	Primary bile acid biosynthesis	44213	0.879628	0.974905	0	0	0.471234	0.0604388	SCP2
	protein targeting (GO:0006605)	27/133	0.00291467	0.0448467	0	0	1.93217	11.28	SYS1;NCF1;ZDHHC7;ZDHHC21;ZDHHC2;ZDHHC3;GABARAP;ZDHHC4;GOLGA7B;SDCBP;ZDHHC18;LAMP2;TSPO;HOMER3;GOLGA7;AP1M2;VTI1B;TIMM8B;ATG3;TMEM50A;RAB3IP;SORL1;PARD3;VPS41;SRPRA;OPTN;ATG4D	.	Ascorbate and aldarate metabolism	10990	0.881321	0.974905	0	0	0.538417	0.0680202	ALDH2;ALDH9A1
	regulation of peptidase activity (GO:0052547)	7/18	0.00293924	0.0448467	0	0	4.81172	28.0504	CST3;SERPINB4;CSTB;ECM1;PINK1;CTSH;FURIN	.	Tryptophan metabolism	15401	0.883908	0.974905	0	0	0.57972	0.0715388	ALDH2;MAOA;ALDH9A1
	glyceraldehyde-3-phosphate metabolic process (GO:0019682)	7/18	0.00293924	0.0448467	0	0	4.81172	28.0504	G6PD;GLYCTK;TALDO1;PGD;RBKS;KHK;DERA	.	Asthma	11355	0.892436	0.974905	0	0	0.519821	0.0591556	IL10;FCER1G
	actin filament polymerization (GO:0030041)	7/18	0.00293924	0.0448467	0	0	4.81172	28.0504	PREX1;GSN;CATIP;CORO7;RAC1;JAK2;MSRB1	.	RNA polymerase	11355	0.892436	0.974905	0	0	0.519821	0.0591556	POLR1D;POLR2J
	ion transport (GO:0006811)	50/289	0.00297997	0.0453081	0	0	1.59073	9.25141	RYR1;GABRB1;TCIRG1;SLC8A1;TSPO;ATP6V1E1;SLC12A7;SLC39A1;ATP6V0B;ATP6V0E1;ATP6AP1;TSC22D3;ATP1B3;ASPH;SLC9A9;ATP6V1B2;VDAC1;SLC25A10;ATP6V0D1;SGK1;RAF1;TTYH3;SLC24A3;SLC1A1;ATP2C2;PKD1L3;CLCN2;PDZD3;SLC17A9;PDZD11;CHRNE;UBC;ANO10;SLC15A3;ATP6V1D;ATP6V1C1;ATP6V0A1;ATP6V1F;CTNS;MCOLN1;SLC8B1;TPCN2;CLCN7;P2RX4;FXYD4;OSTM1;P2RX1;SLC26A8;PLP2;SLC26A6	.	Fat digestion and absorption	15766	0.893401	0.974905	0	0	0.565195	0.0637083	SCARB1;DGAT2;CD36
	regulation of interferon-gamma production (GO:0032649)	12/43	0.00303792	0.0460272	0	0	2.9299	16.9834	PYCARD;IL23A;SLC11A1;IL1B;IL18;RARA;IL12B;SLAMF6;FADD;CD14;LGALS9;TLR4	.	Type I diabetes mellitus	15766	0.893401	0.974905	0	0	0.565195	0.0637083	IL1B;IL12B;FAS
	protein lipidation (GO:0006497)	26/127	0.00305606	0.0461402	0	0	1.95243	11.3058	PGAP2;PIGN;ZDHHC7;LYPD3;ZDHHC21;THY1;WDR45;SELENOK;ZDHHC2;ZDHHC3;OTOA;ZDHHC18;ATG7;WIPI1;DPM2;BST1;PIGB;DPM3;VNN1;VNN2;LYPD6B;ALPL;FOLR2;PIGF;ATG4D;PIGH	.	One carbon pool by folate	44216	0.917171	0.997343	0	0	0.396761	0.0343045	MTHFD2L
	regulation of stress fiber assembly (GO:0051492)	15/60	0.00319596	0.0480841	0	0	2.52422	14.5038	PTGER4;CARMIL1;FHOD1;TPM1;PXN;WAS;ARHGAP28;ARAP1;RHOA;PPM1F;PAK1;DLC1;RAC1;WASF2;ARHGEF5	.	Mismatch repair	44219	0.943008	0.999995	0	0	0.342599	0.0201039	POLD4
	homotypic cell-cell adhesion (GO:0034109)	11/38	0.00327356	0.0485356	0	0	3.08301	17.6406	STXBP3;MEGF11;ITGB3;PLEK;MYH9;TLN1;GATA1;MYL9;MYL12A;ACTB;FERMT3	.	Primary immunodeficiency	13912	0.946889	0.999995	0	0	0.418579	0.0228432	ORAI1;JAK3
	actin filament depolymerization (GO:0030042)	5/10	0.00331622	0.0485356	0	0	7.55736	43.1445	WDR1;MICAL1;CFL1;TWF2;DSTN	.	Autoimmune thyroid disease	19419	0.956233	0.999995	0	0	0.451899	0.020224	IL10;TG;FAS
	low-density lipoprotein particle receptor catabolic process (GO:0032802)	5/10	0.00331622	0.0485356	0	0	7.55736	43.1445	AP2S1;CLTA;AP2A1;VLDLR;AP2A2	.	Aminoacyl-tRNA biosynthesis	24198	0.958599	0.999995	0	0	0.48579	0.0205402	SARS1;CARS1;TARS1;PSTK
	membrane raft organization (GO:0031579)	5/10	0.00331622	0.0485356	0	0	7.55736	43.1445	ANXA2;NPC1;PPT1;FLOT1;FLOT2	.	Graft-versus-host disease	15373	0.964914	0.999995	0	0	0.376635	0.0134521	IL1B;FAS
	cellular response to thyroid hormone stimulus (GO:0097067)	5/10	0.00331622	0.0485356	0	0	7.55736	43.1445	CTSH;GAS2L1;GATA1;CTSS;CTSB	.	Basal transcription factors	16469	0.974403	0.999995	0	0	0.350299	0.00908338	GTF2B;TAF10
	copper ion transport (GO:0006825)	6/14	0.00332713	0.0485356	0	0	5.66949	32.3481	STEAP3;STEAP4;SLC31A2;STEAP1;STEAP2;ATOX1	.	Proteasome	16834	0.976974	0.999995	0	0	0.342318	0.00797429	PSMA6;PSMD6
	purine-containing compound salvage (GO:0043101)	6/14	0.00332713	0.0485356	0	0	5.66949	32.3481	PNP;GMPR;AMPD2;AMPD3;HPRT1;DCK	.	Insulin secretion	31533	0.978439	0.999995	0	0	0.464496	0.0101248	GNA11;ATP1B3;PLCB1;ADCY6;CREB5
	negative regulation of cell migration involved in sprouting angiogenesis (GO:0090051)	6/14	0.00332713	0.0485356	0	0	5.66949	32.3481	CARD10;HDAC5;NOTCH1;KLF4;THBS1;RHOA	.	Nucleotide excision repair	17199	0.979295	0.999995	0	0	0.334692	0.00700267	POLD4;DDB2
	clathrin coat assembly (GO:0048268)	6/14	0.00332713	0.0485356	0	0	5.66949	32.3481	HIP1;CLTB;HIP1R;AP2S1;CLTA;PICALM	.	Steroid hormone biosynthesis	22341	0.97936	0.999995	0	0	0.389391	0.00812099	SRD5A3;COMT;CYP3A4
	cellular nitrogen compound biosynthetic process (GO:0044271)	8/23	0.00336871	0.0488155	0	0	4.03349	22.9636	GCHFR;ARG2;GCH1;SPHK2;DDAH2;SPHK1;GBA;ACER3	.	Antigen processing and presentation	28581	0.98549	0.999995	0	0	0.406735	0.005945	HSP90AA1;CTSS;CTSB;LGMN
	lysosomal transport (GO:0007041)	17/72	0.00336892	0.0488155	0	0	2.34132	13.3295	SCARB2;SORT1;AKTIP;DENND3;SORL1;PINK1;FAM160A2;LAMP1;NPC1;HGS;VPS41;ANKFY1;RAB7B;RILP;VPS39;ARSB;RAB7A	.	RNA degradation	28946	0.986742	0.999995	0	0	0.401289	0.00535607	BTG3;BTG1;ENO1;PATL1
	proteolysis (GO:0006508)	50/291	0.00343636	0.048949	0	0	1.57734	8.94881	RET;RNPEPL1;CTSZ;ECE1;SPPL3;CAPN15;CTSS;LACTB;SCPEP1;PSMD6;MMP25;CASP7;PLAU;CTSK;CASP3;CAPN2;CASP1;CTSH;CAPN3;CTSF;CAPN1;GGT1;CTSD;CTSC;CTSB;ADAMTS7;SRGN;F2;MMP8;MMP9;PSMA6;UQCRC1;PEF1;HM13;HTRA1;FURIN;PSEN1;SRI;APH1A;DPP7;TBL1X;GGT5;ST14;ACE;GCA;PGA5;CAPN14;BMP1;CAPN10;LGMN	.	DNA replication	13150	0.988729	0.999995	0	0	0.215189	0.00243919	POLD4
	regulation of cell growth (GO:0001558)	37/201	0.00344531	0.048949	0	0	1.71313	9.7147	ACVRL1;CDA;CDKN1A;BTG1;NAIF1;LTBP4;DERL2;ENO1;ACVR1B;CXCL16;SDCBP;SERTAD3;STK11;HYAL1;GNG4;RPS6KA1;SESN2;SLIT3;CDKN2D;ARHGEF11;EGLN2;CISH;SPHK1;CDK11B;DCBLD2;ST7L;DCSTAMP;PSRC1;BCL6;PPT1;LAMTOR2;LAMTOR1;SGK1;S100A9;SLC25A33;SIPA1;S100A8	.	Retinol metabolism	24898	0.989544	0.999995	0	0	0.347319	0.00365061	DHRS9;CYP3A4;DHRS3
	entry into host cell (GO:0030260)	10/33	0.00344615	0.048949	0	0	3.2895	18.6531	VAMP8;ACE2;GRK2;NPC1;SRC;ITGB3;CTNND1;UBC;WWP2;GRB2	.	Fanconi anemia pathway	19756	0.990243	0.999995	0	0	0.289522	0.00283862	POLI;SLX1A
	negative regulation of mitochondrion organization (GO:0010823)	10/33	0.00344615	0.048949	0	0	3.2895	18.6531	SLC35F6;PRELID1;PINK1;ACAA2;GPX1;BNIP3;MPV17L;NOL3;CLU;BCL2L1	.	Homologous recombination	14977	0.993958	0.999995	0	0	0.188237	0.00114078	POLD4
	regulation of cell-substrate adhesion (GO:0010810)	10/33	0.00344615	0.048949	0	0	3.2895	18.6531	BST1;NOTCH1;FZD4;PTPRO;THY1;RSU1;RAC1;JAK2;PPM1F;RHOA	.	Neuroactive ligand-receptor interaction	26/341	0.995007	0.999995	0	0	0.618388	0.00309511	PTGER4;GRIA1;GABRB1;THRB;SCT;PTAFR;C5AR1;OPRL1;MLN;LTB4R;HTR7;CNR2;HRH2;CHRNE;P2RY2;TSPO;TACR3;F2;GRIN3A;P2RX4;ADORA2A;ADORA2B;PARD3;P2RX1;NMUR2;F2RL3
	platelet aggregation (GO:0070527)	10/33	0.00344615	0.048949	0	0	3.2895	18.6531	STXBP3;ITGB3;PLEK;MYH9;TLN1;GATA1;MYL9;MYL12A;ACTB;FERMT3	.	mRNA surveillance pathway	35886	0.997763	0.999995	0	0	0.319832	0.000716341	RNGTT;FIP1L1;PPP2R3C;PPP2R5A
	positive regulation of extrinsic apoptotic signaling pathway (GO:2001238)	9/28	0.00350338	0.0495987	0	0	3.5831	20.2589	RET;PYCARD;TNFSF12;RIPK1;FADD;LTBR;THBS1;TANK;DEDD2	.	Taste transduction	31472	0.998306	0.999995	0	0	0.271718	0.0004606	PKD1L3;PLCB1;ADCY6
	negative regulation of cell proliferation (GO:0008285)	60/363	0.00362243	0.0511165	0	0	1.50672	8.46869	ACVRL1;TENM1;BTG3;IFITM1;CDKN1A;RARG;BTG1;ATP8A2;CXCL8;ADARB1;PKD2;ING4;STK11;FTH1;IL12B;JAK2;TNS2;IL10;CD300A;TESC;EREG;KAT2B;HGS;IL1B;IRF1;PPARG;ROR2;ATF5;TRIB1;RAF1;NOTCH1;CTBP2;FOXO4;PPM1D;MNT;TMEM127;NACC2;MXI1;HMOX1;PTK2B;E2F3;S100A11;LYN;CDKN2D;CD164;CDKN2B;VDR;OSM;FUZ;KLF4;SOD2;CDK6;PRKRA;FABP6;DLC1;NEURL1;PTPN6;PTPN2;MXD4;BNIPL	.	Ribosome biogenesis in eukaryotes	4/108	0.999157	0.999995	0	0	0.288914	0.000243565	RCL1;POP7;REXO2;NOP10
	response to tumor necrosis factor (GO:0034612)	21/97	0.00370234	0.0520469	0	0	2.09416	11.7248	CCL14;CXCL8;GCH1;GBA;ACOD1;SELE;TANK;CXCL16;PYCARD;IKBKB;DCSTAMP;ZFP36;HYAL1;OCSTAMP;CASP3;CHI3L1;RIPK1;JAK2;CCL16;NFE2L2;ADAMTS7	.	Herpes simplex virus 1 infection	35/498	0.999821	0.999995	0	0	0.563709	0.000100929	SRC;ITGB3;PIK3CD;CFP;ZNF8;IKBKB;SOCS3;IRAK1;CASP3;EIF4EBP1;ZNF768;ZNF746;IL12B;FADD;JAK2;ZNF565;IFNAR2;TNFSF14;IFNGR1;IFNGR2;STAT2;CARD9;PILRA;TYK2;IRAK4;TNFRSF1A;NFKBIA;IL1B;ZNF613;FAS;ZNF674;MYD88;NECTIN2;BCL2L1;TLR2
	Golgi vesicle transport (GO:0048193)	47/271	0.00371247	0.0520469	0	0	1.5947	8.92402	ARF3;GRIA1;RAB1A;DCTN5;ARF1;NBAS;MCFD2;STX17;DCTN2;KDELR1;PEF1;RAB1B;DCTN4;CTSZ;TGFA;TEX261;IER3IP1;AREG;TFG;CUX1;CAPZB;BGLAP;TMED3;STX5;TBC1D14;CD59;STX4;CTSC;CD55;ATP9A;VTI1B;SCYL1;GABARAPL2;F2;SPTB;SORL1;VAMP8;CAPZA2;RAB13;KDELR2;HYOU1;COPG2;KDELR3;RAB7B;ACTR10;ERGIC1;BET1	.	Spliceosome	5/150	0.999938	0.999995	0	0	0.258532	1.59142e-05	DDX5;PRPF18;CCDC12;SYF2;BUD31
	hexose biosynthetic process (GO:0019319)	16407	0.00373988	0.0522022	0	0	2.83818	15.8617	GPI;PC;PGAM1;PGK1;CHST15;ALDOC;SLC25A10;ENO1;ALDOA;SLC25A11;GAPDH;SLC25A13	.	Ribosome	5/158	0.99997	0.999995	0	0	0.244902	7.29525e-06	RPS9;MRPL1;RPS4Y1;MRPS6;MRPL33
	positive regulation of peptidyl-tyrosine phosphorylation (GO:0050731)	24/116	0.00374773	0.0522022	0	0	1.97786	11.0495	LYN;CSF1R;PTPN1;ACE;SEMA4D;FLT3;SRC;TNK2;ITGB3;STAT3;IL18;OSM;GATA1;TNFRSF1A;SOCS3;TEC;IL23A;ENPP2;IL12B;HCLS1;PTK2B;JAK2;IL6R;CD44	.	RNA transport	6/186	0.999988	0.999995	0	0	0.249522	2.88799e-06	POP7;FXR2;GEMIN4;EIF4EBP1;TACC3;SENP2
	actin cytoskeleton reorganization (GO:0031532)	15/61	0.00378834	0.05239	0	0	2.4692	13.7679	PTPN1;ANXA1;GSN;AUTS2;PLEK;RHOG;PARVB;CDC42BPB;FRY;RHOA;PAK1;PARVG;CAPN10;MYH9;RAC1	.	Olfactory transduction	7/440	0.999995	0.999995	0	0	0.119315	6.53727e-07	RGS2;GRK2;GNAL;GNG7;CALML4;CALM2;SLC8A1
	regulation of tyrosine phosphorylation of STAT protein (GO:0042509)	15/61	0.00378834	0.05239	0	0	2.4692	13.7679	LYN;CSF1R;FLT3;STAT3;IL18;OSM;TNFRSF1A;IL22RA2;SOCS3;IL23A;IL12B;HCLS1;JAK2;IL6R;PTPN2	.
	lipid transport (GO:0006869)	20/91	0.0037976	0.05239	0	0	2.13458	11.8968	SCARB1;PRELID1;STARD5;ABCA6;ABCA3;PITPNA;ABCA9;ABCA7;CLN8;SLC25A17;RXRA;SCP2;NPC2;FABP6;PSAP;SLCO1B3;LBP;MFSD2B;LDLR;PPARD	.
	myeloid leukocyte differentiation (GO:0002573)	13/50	0.00408439	0.0561669	0	0	2.65958	14.6293	CSF1R;BATF3;CEBPE;PIK3CD;SNX10;GAB2;MAPK14;MMP9;DCSTAMP;SBNO2;PIR;MYH9;PPARG	.
	positive regulation of toll-like receptor signaling pathway (GO:0034123)	44396	0.0041886	0.0561689	0	0	4.41049	24.1491	FLOT1;NR1H3;CYBA;LBP;TIRAP;TLR2;LTF	.
	negative regulation of protein localization to cell periphery (GO:1904376)	44396	0.0041886	0.0561689	0	0	4.41049	24.1491	TMEM59;TMBIM1;NUMB;PPP2R5A;RHOQ;PICALM;BCL2L1	.
	positive regulation of blood coagulation (GO:0030194)	44396	0.0041886	0.0561689	0	0	4.41049	24.1491	SELP;PLEK;SERPINE1;F2;THBS1;TLR4;USF1	.
	regulation of platelet activation (GO:0010543)	44396	0.0041886	0.0561689	0	0	4.41049	24.1491	LYN;SELP;FCER1G;TEC;PLEK;F2;TLR4	.
	hexose transmembrane transport (GO:0035428)	44396	0.0041886	0.0561689	0	0	4.41049	24.1491	SLC2A9;SLC2A13;SLC2A3;PPBP;SLC2A6;SLC2A8;PPARD	.
	triglyceride biosynthetic process (GO:0019432)	44396	0.0041886	0.0561689	0	0	4.41049	24.1491	DGAT2;GK;GPAT4;LPL;GPAT3;LPIN2;LPIN3	.
	negative regulation of protein localization to plasma membrane (GO:1903077)	44396	0.0041886	0.0561689	0	0	4.41049	24.1491	TMEM59;TMBIM1;NUMB;PPP2R5A;RHOQ;PICALM;BCL2L1	.
	acylglycerol biosynthetic process (GO:0046463)	44396	0.0041886	0.0561689	0	0	4.41049	24.1491	DGAT2;GK;GPAT4;LPL;GPAT3;LPIN2;LPIN3	.
	phosphate-containing compound metabolic process (GO:0006796)	34/183	0.00421932	0.0564056	0	0	1.73193	9.47035	LPL;PIK3CD;CLN8;NUDT3;GK5;INPP5A;INPP5D;ENPP2;PGK1;XYLB;NADK;G6PD;PLA2G4F;GPX4;GK;TNK2;LIMK2;ITPK1;STAT3;MOCOS;PLA2G4A;OCRL;HDHD2;PLA2G15;ITPKC;PLPP5;PI4KA;PLBD1;FAM20C;ALDOC;FAM20A;ALDOA;PLCB1;PLCD1	.
	granulocyte chemotaxis (GO:0071621)	14/56	0.00432144	0.0574154	0	0	2.52356	13.7387	CCL14;CXCL8;ANXA1;FCER1G;ITGB2;PIK3CD;LGALS3;JAML;CXCR2;S100A12;PIP5K1C;S100A9;S100A8;CCL16	.
	glycosaminoglycan catabolic process (GO:0006027)	14/56	0.00432144	0.0574154	0	0	2.52356	13.7387	CEMIP;SDC4;SDC3;BGN;SGSH;GALNS;VCAN;NAGLU;HYAL1;GPC1;CHORDC1;GPC3;CD44;ARSB	.
	regulation of insulin receptor signaling pathway (GO:0046626)	12693	0.00437818	0.0579908	0	0	3.15226	17.1203	SOCS3;PTPN1;PTPRE;GSK3A;CISH;IL1B;PRKCD;GRB10;PRKCZ;PTPN2	.
	positive regulation of T cell activation (GO:0050870)	16/68	0.00453848	0.058339	0	0	2.33012	12.5714	ANXA1;CLECL1;NOD2;THY1;SIRPB1;PYCARD;CCDC88B;PNP;IL23A;IL7;IL1B;SIRPA;FLOT2;IL12B;LGALS9;JAK3	.
	cellular lipid catabolic process (GO:0044242)	44432	0.00454152	0.058339	0	0	3.78118	20.3976	PLA2G15;NUDT7;ENPP2;MGST2;SMPDL3B;LPIN2;LPIN3;PPARD	.
	negative regulation of protein localization to membrane (GO:1905476)	44432	0.00454152	0.058339	0	0	3.78118	20.3976	TMEM59;GDI1;TMBIM1;NUMB;PPP2R5A;RHOQ;PICALM;BCL2L1	.
	receptor catabolic process (GO:0032801)	44432	0.00454152	0.058339	0	0	3.78118	20.3976	BECN1;SMURF1;AP2S1;CLTA;AP2A1;VLDLR;AP2A2;LGMN	.
	positive regulation of endopeptidase activity (GO:0010950)	44432	0.00454152	0.058339	0	0	3.78118	20.3976	LYN;PYCARD;PRELID1;STAT3;MBP;MEFV;BBC3;PICALM	.
	positive regulation of dephosphorylation (GO:0035306)	44432	0.00454152	0.058339	0	0	3.78118	20.3976	PTPA;DLC1;SMPD1;PRKCD;GBA;PPP2R5A;SPPL3;CALM2	.
	positive regulation of epithelial cell migration (GO:0010634)	17/74	0.00454876	0.058339	0	0	2.25892	12.1821	DOCK5;SCARB1;ANXA3;SRC;FLT4;ITGB3;MMP9;THBS1;PPM1F;RAB11A;RAB25;GLIPR2;HYAL1;ENPP2;CTSH;PTK2B;DOCK1	.
	dicarboxylic acid transport (GO:0006835)	44468	0.00456023	0.058339	0	0	3.40375	18.3475	PRAF2;SLC1A1;ARL6IP5;SLC26A8;SLC25A10;FOLR3;FOLR2;SLC26A6;SLC25A13	.
	positive regulation of interleukin-1 secretion (GO:0050716)	44468	0.00456023	0.058339	0	0	3.40375	18.3475	PYCARD;GSDMD;ORM1;NLRP12;CASP1;NOD2;NLRP1;LGALS9;TLR4	.
	regulation of activated T cell proliferation (GO:0046006)	44468	0.00456023	0.058339	0	0	3.40375	18.3475	PYCARD;IL23A;IL18;IL12B;TNFSF9;FADD;LGALS9;CD24;ICOSLG	.
	positive regulation of epidermal growth factor receptor signaling pathway (GO:0045742)	44468	0.00456023	0.058339	0	0	3.40375	18.3475	HIP1;NCF1;UBC;PLAUR;HIP1R;TGFA;ARAP1;MMP9;EREG	.
	nicotinamide nucleotide metabolic process (GO:0046496)	16772	0.0045666	0.058339	0	0	2.75202	14.8306	HK3;BST1;LDHA;G6PD;PKM;NMNAT1;PGAM1;PGK1;NADSYN1;ALDOA;NADK;HK1	.
	pri-miRNA transcription from RNA polymerase II promoter (GO:0061614)	44293	0.00488928	0.0594702	0	0	10.0733	53.5972	DDX5;SPI1;PPARG;KLF4	.
	death-inducing signaling complex assembly (GO:0071550)	44293	0.00488928	0.0594702	0	0	10.0733	53.5972	RIPK1;FADD;TANK;TNFRSF1A	.
	molybdopterin cofactor metabolic process (GO:0043545)	44293	0.00488928	0.0594702	0	0	10.0733	53.5972	MOCS2;MOCOS;MOCS1;GPHN	.
	retinoic acid receptor signaling pathway (GO:0048384)	44293	0.00488928	0.0594702	0	0	10.0733	53.5972	RARG;RXRA;RARA;ACTN4	.
	heme catabolic process (GO:0042167)	44293	0.00488928	0.0594702	0	0	10.0733	53.5972	HMOX1;BLVRB;HMOX2;BLVRA	.
	porphyrin-containing compound catabolic process (GO:0006787)	44293	0.00488928	0.0594702	0	0	10.0733	53.5972	HMOX1;BLVRB;HMOX2;BLVRA	.
	positive regulation of NK T cell activation (GO:0051135)	44293	0.00488928	0.0594702	0	0	10.0733	53.5972	HSPH1;IL23A;IL18;IL12B	.
	regulation of interleukin-23 production (GO:0032667)	44293	0.00488928	0.0594702	0	0	10.0733	53.5972	RAC1;TLR4;MYD88;IL17RA	.
	peroxisome proliferator activated receptor signaling pathway (GO:0035357)	44293	0.00488928	0.0594702	0	0	10.0733	53.5972	RXRA;PDK3;PPARG;ACTN4	.
	negative regulation of macrophage activation (GO:0043031)	44293	0.00488928	0.0594702	0	0	10.0733	53.5972	NR1H3;BPI;FCGR2B;LDLR	.
	molybdopterin cofactor biosynthetic process (GO:0032324)	44293	0.00488928	0.0594702	0	0	10.0733	53.5972	MOCS2;MOCOS;MOCS1;GPHN	.
	copper ion import (GO:0015677)	44293	0.00488928	0.0594702	0	0	10.0733	53.5972	STEAP3;STEAP4;STEAP1;STEAP2	.
	T-helper 1 type immune response (GO:0042088)	44293	0.00488928	0.0594702	0	0	10.0733	53.5972	IL18;IL12B;TLR4;IL18BP	.
	detection of molecule of bacterial origin (GO:0032490)	44293	0.00488928	0.0594702	0	0	10.0733	53.5972	SCARB1;LY96;LBP;TLR4	.
	membrane invagination (GO:0010324)	44293	0.00488928	0.0594702	0	0	10.0733	53.5972	SNX3;HGS;SMURF1;CHMP2A	.
	bone cell development (GO:0098751)	44293	0.00488928	0.0594702	0	0	10.0733	53.5972	MPIG6B;ANXA2;SRC;ZNF385A	.
	cellular response to laminar fluid shear stress (GO:0071499)	44293	0.00488928	0.0594702	0	0	10.0733	53.5972	MAPK7;KLF4;ASS1;NFE2L2	.
	regulation of cysteine-type endopeptidase activity involved in apoptotic process (GO:0043281)	20/93	0.00492331	0.0597158	0	0	2.07586	11.0307	CDKN2D;GPX1;SRC;NOD1;TNFRSF1B;KLF4;THBS1;SH3RF1;PPM1F;BBC3;PYCARD;NLRP12;RPS6KA1;CASP1;ARL6IP5;SFN;RAF1;NAIP;CD44;LAMTOR5	.
	regulation of protein homooligomerization (GO:0032462)	44362	0.005001	0.0598181	0	0	5.03926	26.6986	SRC;BIK;RIOK3;GBA;CLU;CRYAB	.
	lipoxygenase pathway (GO:0019372)	44362	0.005001	0.0598181	0	0	5.03926	26.6986	GPX1;GPX4;ALOX5;ALOX5AP;ALOX12;LTC4S	.
	cofactor transport (GO:0051181)	44362	0.005001	0.0598181	0	0	5.03926	26.6986	SLC5A6;SLC25A29;SLC25A19;PPT1;FOLR3;FOLR2	.
	positive regulation of syncytium formation by plasma membrane fusion (GO:0060143)	44362	0.005001	0.0598181	0	0	5.03926	26.6986	CD53;EHD1;EHD2;DCSTAMP;FLOT1;MAPK14	.
	protein O-linked fucosylation (GO:0036066)	44362	0.005001	0.0598181	0	0	5.03926	26.6986	LFNG;POFUT2;ADAMTSL4;CFP;THBS1;ADAMTS7	.
	intracellular protein transport (GO:0006886)	57/347	0.00512362	0.060781	0	0	1.49471	7.88292	ZFYVE9;KDELR1;PPP1R10;RAB3D;AP2A1;RAB43;RAB44;XPO6;CHORDC1;LAMP2;TMED3;HOMER3;TBC1D22A;WLS;TBC1D10B;TBC1D8;TBC1D9;RAB32;TBC1D2;RAB31;RABL3;KDELR2;RAB7B;RAB7A;RAB1A;TBC1D9B;RAB5C;STX17;RAB1B;VPS26A;GABARAP;STX11;RAB21;GGA1;RAB20;RAB25;MYO6;RAB24;STX6;STX5;TBC1D14;STX4;STX3;TBC1D12;STX2;AP1M2;SMURF1;STAT3;RAB27B;SORL1;RAB11A;EHD1;BCL6;SNX15;BCL3;RAB13;RAB18	.
	I-kappaB kinase/NF-kappaB signaling (GO:0007249)	14/57	0.00512393	0.060781	0	0	2.46474	12.9986	LY96;TANK;TNFRSF1A;IKBKB;NFKBIA;NKIRAS1;IRAK2;UBC;BCL3;RIPK1;RBCK1;CD14;TLR4;TLR2	.
	protein homotetramerization (GO:0051289)	14/57	0.00512393	0.060781	0	0	2.46474	12.9986	RYR1;CDA;GPX3;DPYS;HM13;PKD2;MCOLN1;SOD2;CRYZ;RXRA;CTH;HPRT1;ALDOA;KCNJ2	.
	organelle assembly (GO:0070925)	61/376	0.00513781	0.060781	0	0	1.4731	7.76493	GALNT11;NCF1;AVIL;CEP19;SNX10;WDR45;MAP1LC3B;MAP1LC3A;TCTN3;SH3PXD2B;BBS9;CAPN3;CC2D2A;ACTR3;ATG3;GABARAPL2;GABARAPL1;DBNL;STARD9;ATG9A;RFX2;VPS37C;KIF24;OCRL;WIPI1;VPS37B;PATL1;RAB32;BIN2;RILPL2;HGS;CHMP4B;CHMP3;ULK1;ALPK3;ATP6V0D1;CFAP54;RAB7A;CHMP5;ATG4D;RAB1A;BECN1;NOTCH1;RAB1B;CORO1A;GABARAP;TP53INP2;ATG7;ATP6V1D;RILP;GSN;NEK6;HPS1;FUZ;RAB11A;EHD1;ATG16L2;ATG16L1;ATG2A;WDR5B;CHMP2A	.
	positive regulation of cell projection organization (GO:0031346)	15/63	0.00524239	0.0618488	0	0	2.36605	12.4241	RET;SCARB2;LYN;CARMIL1;AVIL;TWF2;SNX3;FES;PLXNB3;PTK2B;PLXNB2;SCARF1;S100A9;ARSB;MARK2	.
	interleukin-2-mediated signaling pathway (GO:0038110)	44327	0.00549723	0.0626368	0	0	6.29745	32.7688	STAT5A;STAT5B;IL2RA;PTK2B;JAK3	.
	urea cycle (GO:0000050)	44327	0.00549723	0.0626368	0	0	6.29745	32.7688	ARG2;ACOD1;NAGS;ASS1;NMRAL1	.
	activation of cysteine-type endopeptidase activity involved in apoptotic signaling pathway (GO:0097296)	44327	0.00549723	0.0626368	0	0	6.29745	32.7688	FAS;RIPK1;FADD;JAK2;TANK	.
	negative regulation of amyloid precursor protein catabolic process (GO:1902992)	44327	0.00549723	0.0626368	0	0	6.29745	32.7688	FLOT2;ABCA7;CLU;SORL1;PICALM	.
	cellular response to interleukin-2 (GO:0071352)	44327	0.00549723	0.0626368	0	0	6.29745	32.7688	STAT5A;STAT5B;IL2RA;PTK2B;JAK3	.
	icosanoid biosynthetic process (GO:0046456)	44327	0.00549723	0.0626368	0	0	6.29745	32.7688	ALOX5;ALOX5AP;MGST2;ALOX12;LTC4S	.
	positive regulation of heterotypic cell-cell adhesion (GO:0034116)	44327	0.00549723	0.0626368	0	0	6.29745	32.7688	IL10;IL1B;FLOT1;THY1;CD44	.
	positive regulation of sodium ion transmembrane transporter activity (GO:2000651)	44327	0.00549723	0.0626368	0	0	6.29745	32.7688	TESC;CHORDC1;DMD;GLRX;ACTN4	.
	response to thyroid hormone (GO:0097066)	44327	0.00549723	0.0626368	0	0	6.29745	32.7688	CTSH;GAS2L1;GATA1;CTSS;CTSB	.
	positive regulation of leukocyte degranulation (GO:0043302)	44327	0.00549723	0.0626368	0	0	6.29745	32.7688	FGR;LAMP1;ITGB2;STX4;GAB2	.
	positive regulation of myoblast fusion (GO:1901741)	44327	0.00549723	0.0626368	0	0	6.29745	32.7688	CD53;EHD1;EHD2;FLOT1;MAPK14	.
	negative regulation of tumor necrosis factor production (GO:0032720)	13058	0.00549776	0.0626368	0	0	3.026	15.7455	IL10;ORM1;ARG2;C5AR2;RARA;BPI;LBP;LGALS9;TLR4;LILRA4	.
	positive regulation of NIK/NF-kappaB signaling (GO:1901224)	13058	0.00549776	0.0626368	0	0	3.026	15.7455	CARD10;IRAK1;CHI3L1;NOD1;NOD2;CD14;ACTN4;TANK;CARD14;TIRAP	.
	regulation of cellular component movement (GO:0051270)	17137	0.00553308	0.0628732	0	0	2.67093	13.8808	LYN;CDK6;FES;ACTN1;CD9;NRG1;MEMO1;ACTN4;ARAP1;RAF1;RHOA;EREG	.
	vacuolar acidification (GO:0007035)	44397	0.00580131	0.065491	0	0	4.07099	20.9643	ATP6V0B;ATP6V0E1;SLC11A1;PPT1;TCIRG1;ATP6V0D1;ATP6V0A1	.
	regulation of vacuole organization (GO:0044088)	44397	0.00580131	0.065491	0	0	4.07099	20.9643	SCARB2;LAPTM4B;MTMR3;ANXA2;RAB1B;TBC1D14;TBC1D12	.
	cellular response to organic substance (GO:0071310)	26/133	0.00580988	0.065491	0	0	1.84232	9.48462	CSF1R;RAMP2;RAMP3;FLT3;TWF2;IL18BP;MAPK7;CASP1;MAPK1;SLIT3;JUNB;STAT5B;JUN;STAT3;IL18;MAPK14;KLF4;MAPK13;NLRP12;IL1B;HCLS1;PTPN9;PTPN6;PTPN5;PTPN2;IL18R1	.
	protein palmitoylation (GO:0018345)	44469	0.00584927	0.065491	0	0	3.24148	16.6659	GOLGA7B;ZDHHC18;ZDHHC21;ZDHHC7;SELENOK;ZDHHC2;GOLGA7;ZDHHC3;ZDHHC4	.
	regulation of cell migration involved in sprouting angiogenesis (GO:0090049)	44469	0.00584927	0.065491	0	0	3.24148	16.6659	HDAC5;MAP3K3;CARD10;NOTCH1;ANXA1;HMOX1;KLF4;THBS1;RHOA	.
	positive regulation of cell-substrate adhesion (GO:0010811)	13/52	0.00585445	0.065491	0	0	2.52291	12.9691	DOCK5;CARMIL1;FN1;OLFM4;PPM1F;CRKL;CDK6;PTK2B;CD36;RAC1;RSU1;JAK2;DOCK1	.
	regulation of cellular protein localization (GO:1903827)	44433	0.0060039	0.0665946	0	0	3.55856	18.2033	PTPN1;RALB;HFE;CSNK1E;LCP1;SPIDR;NDEL1;RAB11FIP5	.
	L-amino acid transport (GO:0015807)	44433	0.0060039	0.0665946	0	0	3.55856	18.2033	SLC6A9;PRAF2;SLC1A1;ARL6IP5;SLC38A7;CTNS;SLC3A2;SLC25A13	.
	positive regulation of interleukin-12 production (GO:0032735)	44433	0.0060039	0.0665946	0	0	3.55856	18.2033	IL23A;IL12B;LGALS9;MAPK14;PLCB1;TLR4;TIRAP;TLR2	.
	neutrophil migration (GO:1990266)	14/58	0.00604221	0.0665946	0	0	2.40858	12.3054	CCL14;CXCL8;FCER1G;ITGB2;PIK3CD;IRAK4;LGALS3;JAML;CXCR2;S100A12;PIP5K1C;S100A9;S100A8;CCL16	.
	positive regulation of cell morphogenesis involved in differentiation (GO:0010770)	14/58	0.00604221	0.0665946	0	0	2.40858	12.3054	DOCK5;CARMIL1;FBXW8;SS18L1;OLFM4;RHOA;CRKL;CUX1;PLXNA2;PLXNB3;PLXNB2;RAC1;OBSL1;DOCK1	.
	regulation of cellular component organization (GO:0051128)	27/140	0.00604565	0.0665946	0	0	1.81176	9.25521	RAB5C;HIP1;LTBP4;RAB21;STK11;RAB20;NCLN;OPHN1;CAPZB;CFL1;AP2S1;STK38L;ARHGEF11;PTPN1;HSP90AA1;GSN;EGLN2;CISH;SEMA4D;HIP1R;CDK11B;PINK1;BMP2K;LAMTOR2;LAMTOR1;SGK1;PICALM	.
	gluconeogenesis (GO:0006094)	15281	0.00618556	0.06779	0	0	2.77423	14.1085	GPI;PC;PGAM1;PGK1;ALDOC;SLC25A10;ENO1;ALDOA;SLC25A11;GAPDH;SLC25A13	.
	positive regulation of receptor-mediated endocytosis (GO:0048260)	15281	0.00618556	0.06779	0	0	2.77423	14.1085	RAB21;CD63;HIP1;ANXA2;HFE;SERPINE1;HIP1R;PPT1;CLU;SELE;PICALM	.
	positive regulation of apoptotic process (GO:0043065)	51/307	0.00624414	0.0682587	0	0	1.51398	7.68511	RARG;CSRNP3;BTG1;ITSN1;BBC3;ING4;PYCARD;PREX1;ADAMTSL4;TCTN3;ARL6IP5;CASP1;CTSH;RAC1;PHLDA3;ARHGEF11;BNIP3L;VAV1;DNM2;TIAM2;DDIT3;ARHGEF5;NOD1;PSEN1;NLRC4;FGD1;PPM1F;STK3;APH1A;FGD3;PTPA;UBC;MAP3K20;RIPK1;FADD;ATG7;SRPK2;JUN;GADD45B;GADD45A;BNIP3;SIAH1;HIP1R;GADD45G;BCL6;STK17A;DLC1;NEURL1;FAS;MAP3K11;CDK5R1	.
	negative regulation of I-kappaB kinase/NF-kappaB signaling (GO:0043124)	17502	0.00665505	0.0725669	0	0	2.59447	13.0045	PYCARD;IL10;NFKBIA;NLRP12;NLRX1;TNIP1;RIOK3;TNIP3;CARD19;RIPK1;NLRP1;TANK	.
	monocarboxylic acid transport (GO:0015718)	13/53	0.00694386	0.0751468	0	0	2.4597	12.2244	STARD5;SLC16A12;SLC5A6;SLC25A17;RXRA;FABP6;SLCO1B3;SLC38A7;SLC16A7;SLC16A3;SLC26A6;SLC16A5;PPARD	.
	positive regulation of tyrosine phosphorylation of STAT protein (GO:0042531)	13/53	0.00694386	0.0751468	0	0	2.4597	12.2244	LYN;CSF1R;FLT3;STAT3;IL18;OSM;TNFRSF1A;SOCS3;IL23A;IL12B;HCLS1;JAK2;IL6R	.
	neutrophil chemotaxis (GO:0030593)	13/53	0.00694386	0.0751468	0	0	2.4597	12.2244	CCL14;CXCL8;FCER1G;ITGB2;PIK3CD;LGALS3;JAML;CXCR2;S100A12;PIP5K1C;S100A9;S100A8;CCL16	.
	protein complex assembly (GO:0006461)	34/189	0.00703157	0.0759058	0	0	1.66432	8.25061	GRIA1;RAB1A;MCFD2;NCF1;PEF1;RAB1B;CTSZ;TGFA;NOD1;NOD2;NOL3;AREG;TANK;SLC6A4;TFG;IRAK1;SH3PXD2B;STX5;HACL1;RIPK1;CD59;NLRP1;FADD;STX2;CTSC;GSDMD;TCF7L2;DBNL;FN1;TNFRSF1A;BIN2;DDIT3;FERMT3;BET1	.
	regulation of cell death (GO:0010941)	20/96	0.00711568	0.0764512	0	0	1.99358	9.85917	BNIP3L;LRPAP1;BECN1;JUN;RAMP3;LRP1;BNIP3;CTSZ;PARP16;CLU;DLC1;CHORDC1;CHMP2A;CHMP4B;CD36;PRODH;JUNB;CRYAB;IER3;SLC25A24	.
	defense response to Gram-positive bacterium (GO:0050830)	15/65	0.00711751	0.0764512	0	0	2.27115	11.2313	GSDMD;PGLYRP4;PGLYRP2;PPP1R11;HMGB2;DEFB1;LYZ;TIRAP;FGR;ROMO1;LBP;PGLYRP1;DEFB4A;MYD88;TLR2	.
	leukocyte adhesion to vascular endothelial cell (GO:0061756)	44363	0.00721846	0.0767717	0	0	4.53507	22.363	SELP;SELPLG;PODXL2;SELL;ITGB7;SELE	.
	regulation of intrinsic apoptotic signaling pathway in response to DNA damage (GO:1902229)	44363	0.00721846	0.0767717	0	0	4.53507	22.363	CDKN2D;NACC2;SNAI1;CLU;TPT1;BCL2L1	.
	leukocyte tethering or rolling (GO:0050901)	44363	0.00721846	0.0767717	0	0	4.53507	22.363	SELP;SELPLG;PODXL2;SELL;ITGB7;SELE	.
	activation of NF-kappaB-inducing kinase activity (GO:0007250)	44363	0.00721846	0.0767717	0	0	4.53507	22.363	CARD10;IRAK1;CHI3L1;TANK;CARD14;TIRAP	.
	negative regulation of extrinsic apoptotic signaling pathway via death domain receptors (GO:1902042)	11567	0.0074018	0.0779535	0	0	3.09397	15.1791	GPX1;SERPINE1;TMBIM1;HMOX1;FAS;RIPK1;FADD;TANK;BCL2L1	.
	positive regulation of interleukin-1 beta production (GO:0032731)	11567	0.0074018	0.0779535	0	0	3.09397	15.1791	PYCARD;GSDMD;ORM1;NLRP12;CASP1;NOD2;NLRP1;LGALS9;TLR4	.
	lysosome organization (GO:0007040)	11567	0.0074018	0.0779535	0	0	3.09397	15.1791	FAM160A2;AKTIP;GAA;HPS1;LAMTOR1;CORO1A;ARSB;TPCN2;TMEM165	.
	negative regulation of toll-like receptor signaling pathway (GO:0034122)	11567	0.0074018	0.0779535	0	0	3.09397	15.1791	LYN;CD300A;LY96;ACOD1;CD14;SMPDL3B;RAB7B;TLR4;LILRA4	.
	regulation of viral entry into host cell (GO:0046596)	44434	0.00779775	0.0817296	0	0	3.36067	16.3124	FCN1;IFITM3;SNX3;IFITM1;GSN;LGALS9;P4HB;NECTIN2	.
	GTP metabolic process (GO:0046039)	44398	0.00783605	0.0817296	0	0	3.77999	18.3293	MOCS2;MOCOS;AK3;AK4;MOCS1;GPHN;RHOQ	.
	regulation of macrophage activation (GO:0043030)	44398	0.00783605	0.0817296	0	0	3.77999	18.3293	TNIP2;NR1H3;BPI;LBP;FCGR2B;THBS1;TLR4	.
	vesicle docking (GO:0048278)	44398	0.00783605	0.0817296	0	0	3.77999	18.3293	STX17;STX6;STX5;STX4;STX3;STX2;STX11	.
	cellular response to peptide hormone stimulus (GO:0071375)	22/110	0.00809149	0.0841905	0	0	1.89424	9.12446	HDAC5;GSK3A;SRC;INSR;PRKCD;GNG11;ADCY6;USF1;KAT2B;GNG10;RAB31;PKM;GNG2;GNG5;GNG4;CAPN10;GNB2;GNG7;RAB13;PPARG;SLC25A33;RHOQ	.
	cell morphogenesis involved in differentiation (GO:0000904)	13/54	0.00818776	0.0849874	0	0	2.39957	11.5302	ITGB3;ACTN1;FN1;LAMC1;PARVB;OPHN1;RILPL2;RAB25;PARVG;ITGB7;RAC1;SRGAP2;FERMT3	.
	regulation of ERK1 and ERK2 cascade (GO:0070372)	42/247	0.00823771	0.085097	0	0	1.55543	7.46458	RET;CCL14;CSF1R;PTPRR;SEMA7A;RAMP3;NOTCH1;RGS14;FLT3;FLT4;C5AR1;NOD2;PRKCZ;PYCARD;GLIPR2;PTK2B;LGALS9;CD36;CCL16;LYN;CCR1;PTPN1;ATP6AP1;INSR;FN1;LMTK2;ABCA7;SYNJ2BP;MERTK;TIRAP;MARCO;TNIP1;IL1B;CNKSR3;CHI3L1;PTPN6;SPRY1;ROR2;RAF1;TLR4;CD44;PTPN2	.
	JNK cascade (GO:0007254)	15/66	0.00823774	0.085097	0	0	2.22649	10.685	PTGER4;MAP2K4;DBNL;NOD1;NOD2;CRKL;IRAK1;ADORA2B;IRAK2;UBC;MAP3K20;RIPK1;MAP3K6;TRIB1;MAP3K11	.
	cellular response to acid chemical (GO:0071229)	19/91	0.00836471	0.0853982	0	0	1.99871	9.56132	RET;LYN;RARG;FZD4;TESC;TWF2;SESN2;NEURL1;CAPN2;PDK4;RARA;PDK3;PTK2B;FFAR2;LAMTOR2;LAMTOR1;LAMTOR3;CPEB4;LAMTOR5	.
	regulation of peptidyl-threonine phosphorylation (GO:0010799)	13789	0.00839657	0.0853982	0	0	2.80153	13.3911	CEMIP;SPRED1;SPHK1;PARD3;PLK1;DDIT4;PRKAG2;MAPK1;CHI3L1;CALM2	.
	regulation of myoblast fusion (GO:1901739)	44328	0.008524	0.0853982	0	0	5.3975	25.7184	CD53;EHD1;EHD2;FLOT1;MAPK14	.
	ribose phosphate metabolic process (GO:0019693)	44328	0.008524	0.0853982	0	0	5.3975	25.7184	G6PD;TALDO1;PGD;RBKS;DERA	.
	nucleoside catabolic process (GO:0009164)	44328	0.008524	0.0853982	0	0	5.3975	25.7184	NT5C3A;DPYS;DPYD;UPP1;DERA	.
	polyamine metabolic process (GO:0006595)	44328	0.008524	0.0853982	0	0	5.3975	25.7184	SMOX;SMS;SAT1;OAZ1;OAZ2	.
	cellular response to fluid shear stress (GO:0071498)	44328	0.008524	0.0853982	0	0	5.3975	25.7184	MAPK7;KLF4;PKD2;ASS1;NFE2L2	.
	PERK-mediated unfolded protein response (GO:0036499)	44328	0.008524	0.0853982	0	0	5.3975	25.7184	CXCL8;DDIT3;ATF3;HERPUD1;NFE2L2	.
	endosome transport via multivesicular body sorting pathway (GO:0032509)	44328	0.008524	0.0853982	0	0	5.3975	25.7184	LAPTM4B;SORT1;TMEM50A;RILP;UBXN6	.
	negative regulation of interleukin-12 production (GO:0032695)	44328	0.008524	0.0853982	0	0	5.3975	25.7184	IL10;MEFV;THBS1;JAK3;CMKLR1	.
	pentose-phosphate shunt (GO:0006098)	44328	0.008524	0.0853982	0	0	5.3975	25.7184	G6PD;TALDO1;PGD;RBKS;DERA	.
	carbohydrate derivative transport (GO:1901264)	44328	0.008524	0.0853982	0	0	5.3975	25.7184	SCARB1;SLC25A19;NPC2;VLDLR;LBP	.
	regulation of cholesterol storage (GO:0010885)	44328	0.008524	0.0853982	0	0	5.3975	25.7184	EHD1;SCARB1;NR1H3;LPL;PPARG	.
	positive regulation of tissue remodeling (GO:0034105)	44294	0.00887623	0.0859363	0	0	7.55456	35.6906	IL23A;TMBIM1;IL18;IL12B	.
	phagolysosome assembly (GO:0001845)	44294	0.00887623	0.0859363	0	0	7.55456	35.6906	RAB20;RAB7B;CORO1A;RAB7A	.
	regulation of cytoplasmic transport (GO:1903649)	44294	0.00887623	0.0859363	0	0	7.55456	35.6906	MAP2K2;SRC;CHMP3;MAPK1	.
	regulation of toll-like receptor 2 signaling pathway (GO:0034135)	44294	0.00887623	0.0859363	0	0	7.55456	35.6906	LYN;ACOD1;CYBA;TIRAP	.
	diol biosynthetic process (GO:0034312)	44294	0.00887623	0.0859363	0	0	7.55456	35.6906	SPHK2;SPHK1;ACER3;GBA	.
	sphingosine biosynthetic process (GO:0046512)	44294	0.00887623	0.0859363	0	0	7.55456	35.6906	SPHK2;SPHK1;ACER3;GBA	.
	membrane lipid catabolic process (GO:0046466)	44294	0.00887623	0.0859363	0	0	7.55456	35.6906	PPT1;MGST2;NAGA;SMPDL3B	.
	positive regulation of toll-like receptor 4 signaling pathway (GO:0034145)	44294	0.00887623	0.0859363	0	0	7.55456	35.6906	NR1H3;LBP;TIRAP;LTF	.
	response to hydroperoxide (GO:0033194)	44294	0.00887623	0.0859363	0	0	7.55456	35.6906	GPX3;PRKCD;STX4;STX2	.
	bone resorption (GO:0045453)	44294	0.00887623	0.0859363	0	0	7.55456	35.6906	SRC;IL7;RAB3D;PTK2B	.
	regulation of T-helper 2 cell differentiation (GO:0045628)	44294	0.00887623	0.0859363	0	0	7.55456	35.6906	ANXA1;RARA;IL18;PRKCZ	.
	regulation of amyloid fibril formation (GO:1905906)	44294	0.00887623	0.0859363	0	0	7.55456	35.6906	PSEN1;CLU;CRYAB;LDLR	.
	positive regulation of chemokine secretion (GO:0090197)	44294	0.00887623	0.0859363	0	0	7.55456	35.6906	PYCARD;CSF1R;LPL;MBP	.
	pantothenate metabolic process (GO:0015939)	44294	0.00887623	0.0859363	0	0	7.55456	35.6906	SLC5A6;VNN1;VNN2;PDZD11	.
	regulation of stress-activated protein kinase signaling cascade (GO:0070302)	44294	0.00887623	0.0859363	0	0	7.55456	35.6906	LYN;MAP2K2;FAS;MAPK1	.
	phosphatidylinositol biosynthetic process (GO:0006661)	20/98	0.00897624	0.08671	0	0	1.94224	9.15414	ARF3;ARF1;MTMR3;PGAP2;PIGN;PIK3CD;OCRL;BMX;PIK3R5;DPM2;PIGB;DPM3;INPP5D;PI4KA;PIP5K1B;PIP5K1C;CDIPT;PIGF;PI4K2A;PIGH	.
	substrate adhesion-dependent cell spreading (GO:0034446)	11933	0.00924996	0.0891547	0	0	2.95928	13.8587	PARVG;ITGB3;FN1;ITGB7;LAMC1;RAC1;PARVB;SRGAP2;FERMT3	.
	cytosolic transport (GO:0016482)	23/118	0.00942126	0.0904996	0	0	1.83449	8.55748	TMEM87A;BECN1;SYS1;SORT1;AKTIP;DENND2A;ZFYVE21;LMTK2;VPS26A;AP2A1;FAM160A2;LAMP1;STX6;ANKFY1;STX5;DENND5A;TBC1D23;CORO7;WASHC1;RILP;TBC1D10B;VTI1B;RAB7A	.
	glutathione metabolic process (GO:0006749)	18233	0.00943141	0.0904996	0	0	2.45395	11.4445	GGT5;GSTM3;G6PD;GPX1;ETHE1;GSS;GSR;MGST1;MGST2;CTNS;GGT1;CNDP2	.
	negative regulation of protein serine/threonine kinase activity (GO:0071901)	15/67	0.00949366	0.0906939	0	0	2.18355	10.1691	LYN;PTPN1;RGS14;CD300A;DUSP1;PRKCD;PAQR3;GBA;PLK1;SORL1;PYCARD;RGS2;SMPD1;IL1B;SPRY1	.
	regulation of protein localization to plasma membrane (GO:1903076)	15/67	0.00949366	0.0906939	0	0	2.18355	10.1691	RAMP3;LRP1;RHOG;PPP2R5A;VAMP8;TMEM59;TMBIM1;NUMB;PTPN9;STX4;STX3;RHOQ;VTI1B;PICALM;BCL2L1	.
	positive regulation of T cell proliferation (GO:0042102)	14/61	0.0096077	0.091379	0	0	2.25446	10.4724	ANXA1;IL18;CLECL1;PYCARD;CCDC88B;PNP;IL23A;IL1B;IL12B;TNFSF9;FADD;CD24;JAK3;ICOSLG	.
	negative regulation of MAP kinase activity (GO:0043407)	14/61	0.0096077	0.091379	0	0	2.25446	10.4724	LYN;PTPN1;RGS14;CD300A;DUSP1;PRKCD;PAQR3;GBA;SORL1;SPRED1;RGS2;SMPD1;IL1B;SPRY1	.
	protein targeting to vacuole (GO:0006623)	44435	0.00996578	0.0942934	0	0	3.18361	14.672	SCARB2;TMEM50A;SMURF1;HGS;VPS41;SORL1;VTI1B;RAB7A	.
	negative regulation of interleukin-8 production (GO:0032717)	44364	0.010067	0.0942934	0	0	4.12256	18.9576	IL10;ANXA1;ANXA4;BCL3;BPI;KLF4	.
	negative regulation of intracellular transport (GO:0032387)	44364	0.010067	0.0942934	0	0	4.12256	18.9576	SLC35F6;ACAA2;CD300A;MPV17L;LGALS9;CRYAB	.
	virion assembly (GO:0019068)	44364	0.010067	0.0942934	0	0	4.12256	18.9576	RAB43;RAB1A;RAB1B;UBC;CHMP4B;CHMP5	.
	nucleotide catabolic process (GO:0009166)	44364	0.010067	0.0942934	0	0	4.12256	18.9576	GPX1;PNP;NT5C2;XDH;NUDT3;DERA	.
	regulation of early endosome to late endosome transport (GO:2000641)	44364	0.010067	0.0942934	0	0	4.12256	18.9576	SNX3;RAB21;MAP2K2;SRC;CHMP3;MAPK1	.
	viral entry into host cell (GO:0046718)	44364	0.010067	0.0942934	0	0	4.12256	18.9576	VAMP8;ACE2;GRK2;NPC1;ITGB3;WWP2	.
	cellular response to hormone stimulus (GO:0032870)	17/80	0.0102392	0.0956991	0	0	2.04308	9.36045	STAT5B;RAMP2;JUN;RAMP3;SRC;STAT3;TFPI;GATA1;CTSS;UBE2L3;PAX8;CTSH;SLIT3;ADTRP;GAS2L1;JUNB;CTSB	.
	positive regulation of interleukin-10 production (GO:0032733)	44399	0.0103519	0.0961465	0	0	3.52779	16.1241	PYCARD;IL23A;IL12B;NOD2;LGALS9;PRKCZ;TLR4	.
	positive regulation of erythrocyte differentiation (GO:0045648)	44399	0.0103519	0.0961465	0	0	3.52779	16.1241	FAM210B;STAT5B;STAT3;HMGB2;ACVR1B;MAPK14;GATA1	.
	ER to Golgi vesicle-mediated transport (GO:0006888)	32/180	0.0103539	0.0961465	0	0	1.63974	7.49426	GRIA1;RAB1A;DCTN5;MCFD2;STX17;DCTN2;KDELR1;PEF1;RAB1B;DCTN4;CTSZ;TGFA;TEX261;IER3IP1;AREG;TFG;CAPZB;BGLAP;TMED3;STX5;CD59;CTSC;CD55;VTI1B;F2;SPTB;CAPZA2;HYOU1;COPG2;ACTR10;ERGIC1;BET1	.
	regulation of neuron projection development (GO:0010975)	23/119	0.0104196	0.0963194	0	0	1.81527	8.28503	SCARB2;LYN;RET;AVIL;PAQR3;PTPRO;TWF2;SSH3;ADCY6;SNX3;PAK1;FES;PLXNB3;PLXNB2;PTK2B;PTPN9;DENND5A;S100A9;SCARF1;ARSB;MARK2;DBN1;NDEL1	.
	cellular response to tumor necrosis factor (GO:0071356)	34/194	0.0104364	0.0963194	0	0	1.61185	7.354	CCL14;CXCL8;GBA;TANK;TXNDC17;TNFSF13B;IKBKB;PYCARD;PSMD6;ZFP36;HYAL1;OCSTAMP;UBC;PTK2B;RIPK1;JAK2;RELT;CCL16;ADAMTS7;TNFSF14;TNFSF12;TNFSF13;ACOD1;TNFRSF1B;TNFRSF1A;NFKBIA;DCSTAMP;PSMA6;TNFSF9;FAS;CHI3L1;LTBR;CARD14;NFE2L2	.
	positive regulation of phosphorylation (GO:0042327)	36/208	0.0104394	0.0963194	0	0	1.58788	7.24418	RET;CSF1R;PFKFB4;PFKFB3;RALB;FLT3;FLT4;ITGB3;PELI2;PSEN1;THBS1;SDCBP;PAK1;CCND3;FLOT1;RIPK1;RAC1;LYN;SEMA4D;INSR;AKTIP;PLAUR;LMTK2;F2;MERTK;BTBD10;MMP9;EREG;MARCO;PINK1;IL1B;FAS;FAM20A;WDFY2;ROR2;CARD14	.
	regulation of T cell activation (GO:0050863)	16377	0.0108206	0.0992	0	0	2.5216	11.4135	PYCARD;CCDC88B;LGALS3;PRELID1;GSN;SIRPA;IL27;THY1;TNFAIP8L2;JAK3;SIRPB1	.
	positive regulation of transport (GO:0051050)	16377	0.0108206	0.0992	0	0	2.5216	11.4135	CD63;CD151;ANXA1;LRP1;NUMA1;ANXA2;CAPN10;CHORDC1;FLOT1;SGK1;LDLR	.
	negative regulation of immune response (GO:0050777)	16377	0.0108206	0.0992	0	0	2.5216	11.4135	LYN;LGALS3;NLRP12;NLRX1;CD300A;ACOD1;TRAFD1;NOD1;NOD2;FCGR2B;SAMSN1	.
	positive regulation of protein phosphorylation (GO:0001934)	64/412	0.0110171	0.100788	0	0	1.39817	6.30337	RET;ACVRL1;TENM1;CDKN1A;FLT3;FLT4;ITGB3;HFE;PRKAG2;CCND3;ENPP2;FLOT1;RAC1;JAK2;CCNL1;IL6R;ACVR1;SPHK1;AKTIP;PLAUR;LMTK2;F2;TNFRSF1B;MMP9;TNFRSF1A;EREG;IL1B;HCLS1;CHI3L1;LCP2;ROR2;FAM20A;WDFY2;RAF1;CARD14;CD44;CSF1R;CEMIP;RAMP3;RALB;SRC;PELI2;GATA1;CAMKK1;SDCBP;PAK1;PTK2B;MAPK1;RIPK1;LYN;RBPMS;SEMA4D;TNK2;INSR;PLK1;OSM;MERTK;MARCO;PINK1;TEC;FAS;LAMTOR1;LTBR;CALM2	.
	cellular iron ion homeostasis (GO:0006879)	13/56	0.0111964	0.102211	0	0	2.2877	10.2767	ATP6AP1;SLC11A1;SLC40A1;FTH1;UBC;LCN2;HMOX1;ACO1;ATP6V0D1;FBXL5;ISCU;HMOX2;FTL	.
	positive regulation of locomotion (GO:0040017)	12298	0.0114264	0.104091	0	0	2.83582	12.6813	CSF1R;CHMP2A;CHMP3;CHMP4B;STX4;STX3;VPS37B;THBS1;PPM1F	.
	negative regulation of growth (GO:0045926)	23/120	0.0115015	0.104554	0	0	1.79646	8.02168	ACVRL1;CDKN2D;CDA;CDKN1A;NOTCH1;BTG1;NAIF1;ENO1;ACVR1B;DCBLD2;ST7L;ING4;DCSTAMP;STK11;SERTAD3;PSRC1;BCL6;HYAL1;GNG4;SESN2;PPT1;SLIT3;SIPA1	.
	viral life cycle (GO:0019058)	21/107	0.0117714	0.106783	0	0	1.8496	8.21609	RAB1A;CTBP2;ITGB3;RAB1B;VPS37C;FURIN;WWP2;VPS37B;RAB43;VAMP8;ACE2;GRK2;NPC1;NFIA;UBC;CHMP2A;CHMP4B;CHMP3;UBAP1;CHMP5;RAB7A	.
	vesicle fusion (GO:0006906)	19/94	0.0118312	0.107101	0	0	1.91844	8.51214	SYT4;SAMD9;STX17;STX11;RPH3A;VAMP8;RAB20;VPS41;RAB13;STX6;ANKFY1;STX5;STX4;STX3;RAB7B;STX2;VPS39;RAB7A;VTI1B	.
	negative regulation of response to stimulus (GO:0048585)	24/127	0.0118599	0.107136	0	0	1.76552	7.82938	ACVR1;LYN;RET;CSF1R;PTPN1;MAP3K3;NLRX1;MPIG6B;FLT3;INSR;FLT4;LMTK2;NOD1;THY1;NOD2;MERTK;KLF4;CLU;NLRP12;CDK6;MAPK7;ROR2;RAF1;FCGR2B	.
	protein oligomerization (GO:0051259)	37/217	0.0120121	0.108284	0	0	1.55942	6.89552	TOR2A;DGKD;B4GALT1;IGHMBP2;NOD1;NOD2;NLRC4;NOL3;FGFRL1;SLC6A4;SCUBE3;IRAK1;NACC2;FLOT1;HMOX1;STOM;RIPK1;HACL1;STX2;TGM3;GSDMD;FCER1G;GCH1;VWF;TMEM120A;TAF10;OLFM4;EHD1;EHD4;ATG16L1;DDIT3;CHMP2A;CHMP4B;CHMP3;TMCC1;MICU1;CRYAB	.
	signal transduction by p53 class mediator (GO:0072331)	14519	0.0123437	0.110811	0	0	2.60803	11.4613	PYCARD;DDX5;STK11;MYO6;SESN2;BCL3;ZNF385C;KRCC1;NDRG1;ZNF385A	.
	positive regulation of phagocytosis (GO:0050766)	14519	0.0123437	0.110811	0	0	2.60803	11.4613	PYCARD;FCER1G;SLC11A1;IL1B;SIRPA;ABCA7;CYBA;MERTK;FCGR2B;SIRPB1	.
	regulation of intracellular signal transduction (GO:1902531)	65/422	0.0125173	0.111054	0	0	1.38411	6.06327	ARHGAP9;TP53RK;GDI1;ITSN1;PRKAG2;PYCARD;PREX1;STK11;SPRED1;OPHN1;CAPN3;RAC1;ZNF385A;CMKLR1;IER3;FBXO9;ARHGEF11;RHOG;ARAP3;OCRL;ARAP1;GMIP;RHOA;VAV1;ARHGAP45;TIAM2;IL1B;DDIT4;OPTN;RHOQ;ARHGEF5;NLRX1;SGMS1;NOD1;NOD2;FGD1;ARHGAP12;FGD3;ARHGAP22;RASD2;ARHGAP21;PAK1;CHN2;UBC;MAPK1;PIP5K1B;GPAT3;PIP5K1C;SRGAP2;SRGAP1;BANP;LYN;TAF10;MYO9B;ARHGAP28;ARHGAP26;MAPK14;ARHGAP25;BST1;NLRP12;ARHGAP30;DLC1;TRIP1…	.
	tricarboxylic acid metabolic process (GO:0072350)	44329	0.0125336	0.111054	0	0	4.72255	20.6817	STAT5A;STAT5B;IDH1;ACO1;ASS1	.
	toll-like receptor 9 signaling pathway (GO:0034162)	44329	0.0125336	0.111054	0	0	4.72255	20.6817	IRAK1;TNIP2;IRAK2;IRAK4;MYD88	.
	positive regulation of lamellipodium assembly (GO:0010592)	44329	0.0125336	0.111054	0	0	4.72255	20.6817	AUTS2;TWF2;BRK1;RAC1;WASF2	.
	positive regulation of alpha-beta T cell proliferation (GO:0046641)	44329	0.0125336	0.111054	0	0	4.72255	20.6817	IL23A;IL18;IL12B;LGALS9;CD55	.
	negative regulation of endocytosis (GO:0045806)	44436	0.0125507	0.111054	0	0	3.02426	13.2401	SNX3;LGALS3;NR1H3;SNX33;RAC1;FCGR2B;PICALM;TLR2	.
	regulation of defense response to virus by virus (GO:0050690)	44436	0.0125507	0.111054	0	0	3.02426	13.2401	HCK;ARF1;AP2S1;AP1S2;AP2A1;RAC1;AP2A2;AP1M2	.
	regulation of proteolysis (GO:0030162)	14/63	0.0127825	0.112873	0	0	2.1622	9.42647	SERPINB4;CSTB;PLK1;PLAUR;LTBP4;BTBD11;F2;CLN8;CST3;ABTB2;ASPH;CAPN3;FADD;BTRC	.
	response to retinoic acid (GO:0032526)	13/57	0.0129905	0.114242	0	0	2.23558	9.71033	RET;LYN;CDKN2D;RARG;FZD4;TESC;TWF2;ASXL1;RXRA;RARA;CTSH;PTK2B;PPARG	.
	positive regulation of cell death (GO:0010942)	13/57	0.0129905	0.114242	0	0	2.23558	9.71033	RARG;RAMP3;LRP1;BNIP3;CLU;DLC1;DDIT4;ZNF746;RIPK1;CD36;PRODH;FCGR2B;PICALM	.
	carboxylic acid transport (GO:0046942)	18963	0.013032	0.114374	0	0	2.32784	10.1036	SLC6A6;SLC25A29;SLC7A7;SLC7A8;PSAP;SLC16A12;SLC16A7;SLC25A10;SLC3A2;SLC1A5;SLC16A3;SLC16A5	.
	glycolytic process (GO:0006096)	44400	0.013407	0.116953	0	0	3.30712	14.2602	HK3;LDHA;PKM;PGAM1;PGK1;ALDOA;HK1	.
	regulation of monooxygenase activity (GO:0032768)	44400	0.013407	0.116953	0	0	3.30712	14.2602	HSP90AA1;POR;VDR;DDAH2;IL1B;ZDHHC21;DNM2	.
	regulation of cell size (GO:0008361)	44400	0.013407	0.116953	0	0	3.30712	14.2602	RARG;DEPTOR;PLEK;RAC1;RHOA;VAV1;LAMTOR5	.
	negative regulation of cell growth (GO:0030308)	22/115	0.0135281	0.117154	0	0	1.79189	7.71048	ACVRL1;CDKN2D;CDA;GSK3A;CDKN1A;BTG1;NAIF1;ENO1;ACVR1B;DCBLD2;ST7L;DCSTAMP;STK11;SERTAD3;PSRC1;BCL6;HYAL1;GNG4;SESN2;PPT1;SLIT3;SIPA1	.
	leukotriene biosynthetic process (GO:0019370)	44365	0.0136309	0.117154	0	0	3.7788	16.2315	GGT5;ALOX5;ALOX5AP;MGST2;LTC4S;GGT1	.
	regulation of chemokine production (GO:0032642)	44365	0.0136309	0.117154	0	0	3.7788	16.2315	IL7;FFAR2;LGALS9;IL6R;TLR4;TLR2	.
	regulation of oxidative stress-induced intrinsic apoptotic signaling pathway (GO:1902175)	44365	0.0136309	0.117154	0	0	3.7788	16.2315	VNN1;MAPK7;P4HB;NOL3;SOD2;NFE2L2	.
	positive regulation of p38MAPK cascade (GO:1900745)	44365	0.0136309	0.117154	0	0	3.7788	16.2315	GADD45B;NCF1;GADD45A;IL1B;XDH;GADD45G	.
	negative regulation of oxidative stress-induced intrinsic apoptotic signaling pathway (GO:1902176)	44365	0.0136309	0.117154	0	0	3.7788	16.2315	PINK1;VNN1;MAPK7;NOL3;SOD2;NFE2L2	.
	regulation of smooth muscle cell migration (GO:0014910)	44365	0.0136309	0.117154	0	0	3.7788	16.2315	ACE;LRP1;PLAU;SERPINE1;TRIB1;SORL1	.
	transforming growth factor beta receptor signaling pathway (GO:0007179)	16/76	0.0136471	0.117154	0	0	2.01852	8.66799	ACVRL1;ACVR1;SMAD1;JUN;ZFYVE9;SRC;SMURF1;PXN;FURIN;F11R;PRKCZ;RHOA;PARD3;UBC;ID1;ZYX	.
	sulfur compound biosynthetic process (GO:0044272)	23/122	0.0139354	0.118692	0	0	1.75996	7.52089	GGT5;GSTM3;B4GALT1;CHPF2;GSS;MGST1;BGN;MGST2;PAPSS2;CNDP2;PAPSS1;VCAN;CHSY1;CTH;UST;DSE;CHST15;ST3GAL4;B3GNT3;GGT1;CDO1;B4GALT4;ST3GAL3	.
	apoptotic mitochondrial changes (GO:0008637)	12663	0.0139637	0.118692	0	0	2.72223	11.6274	ATG3;BIK;BNIP3;NAIF1;SFN;SOD2;CLU;BBC3;BCL2L1	.
	regulation of interleukin-1 beta secretion (GO:0050706)	12663	0.0139637	0.118692	0	0	2.72223	11.6274	PYCARD;GSDMD;ORM1;NLRP12;CASP1;NOD2;NLRP1;LGALS9;TLR4	.
	response to amino acid (GO:0043200)	12663	0.0139637	0.118692	0	0	2.72223	11.6274	SESN2;NEURL1;CAPN2;TMBIM6;LAMTOR2;LAMTOR1;LAMTOR3;CPEB4;LAMTOR5	.
	positive regulation of exocytosis (GO:0045921)	12663	0.0139637	0.118692	0	0	2.72223	11.6274	SDCBP;SDC4;ATP6AP1;HGS;RAB3D;CHMP2A;RAB27B;UNC13D;RAB7A	.
	regulation of Notch signaling pathway (GO:0008593)	15/70	0.0141846	0.119112	0	0	2.0641	8.78397	GALNT11;NOTCH3;NOTCH1;ARRDC1;STAT3;WWP2;NOD2;SYNJ2BP;EPN2;LFNG;KAT2B;UBC;NEURL1;TSPAN17;BMP2K	.
	negative regulation of phagocytosis (GO:0050765)	44295	0.0145097	0.119112	0	0	6.0433	25.5809	SNX3;CD300A;FCGR2B;TLR2	.
	regulation of T-helper 1 type immune response (GO:0002825)	44295	0.0145097	0.119112	0	0	6.0433	25.5809	IL23A;SLC11A1;IL12B;IL27	.
	regulation of platelet-derived growth factor receptor-beta signaling pathway (GO:2000586)	44295	0.0145097	0.119112	0	0	6.0433	25.5809	HIP1;LRP1;HIP1R;PTPN2	.
	regulation of integrin activation (GO:0033623)	44295	0.0145097	0.119112	0	0	6.0433	25.5809	SELP;PTGER4;SRC;PLEK	.
	sphingoid biosynthetic process (GO:0046520)	44295	0.0145097	0.119112	0	0	6.0433	25.5809	SPHK2;SPHK1;ACER3;GBA	.
	negative regulation of fibrinolysis (GO:0051918)	44295	0.0145097	0.119112	0	0	6.0433	25.5809	SERPINE1;F2;THBS1;USF1	.
	podosome assembly (GO:0071800)	44295	0.0145097	0.119112	0	0	6.0433	25.5809	DBNL;BIN2;NCF1;SH3PXD2B	.
	engulfment of apoptotic cell (GO:0043652)	44295	0.0145097	0.119112	0	0	6.0433	25.5809	XKR8;RHOG;RAC1;THBS1	.
	positive regulation of myeloid leukocyte mediated immunity (GO:0002888)	44295	0.0145097	0.119112	0	0	6.0433	25.5809	FGR;ITGB2;STX4;GAB2	.
	regulation of leukocyte degranulation (GO:0043300)	44295	0.0145097	0.119112	0	0	6.0433	25.5809	LYN;FES;STXBP2;UNC13D	.
	glucose import (GO:0046323)	44295	0.0145097	0.119112	0	0	6.0433	25.5809	SORT1;SLC2A13;SLC2A6;SLC2A8	.
	granulocyte activation (GO:0036230)	44295	0.0145097	0.119112	0	0	6.0433	25.5809	PREX1;CXCL8;PRKCD;CXCR2	.
	negative regulation of lipid localization (GO:1905953)	44295	0.0145097	0.119112	0	0	6.0433	25.5809	NFKBIA;ITGB3;NR1H3;PTPN2	.
	sphingosine metabolic process (GO:0006670)	44295	0.0145097	0.119112	0	0	6.0433	25.5809	SPHK2;SPHK1;ACER3;GBA	.
	acidic amino acid transport (GO:0015800)	44295	0.0145097	0.119112	0	0	6.0433	25.5809	PRAF2;SLC1A1;ARL6IP5;SLC25A13	.
	megakaryocyte differentiation (GO:0030219)	44295	0.0145097	0.119112	0	0	6.0433	25.5809	CDKN2B;MPIG6B;GATA1;ZNF385A	.
	positive regulation of nitric-oxide synthase biosynthetic process (GO:0051770)	44295	0.0145097	0.119112	0	0	6.0433	25.5809	NOD2;JAK2;TLR4;TLR2	.
	positive regulation of cell adhesion (GO:0045785)	14/64	0.0146473	0.119922	0	0	2.11883	8.94888	RET;CITED2;TPM1;TFE3;SIRPB1;PPM1F;HYAL1;SIRPA;IL12B;STX4;RAC1;RSU1;STX3;JAK2	.
	negative regulation of signaling (GO:0023057)	17/83	0.0146866	0.119922	0	0	1.94988	8.23011	RET;ACVR1;CSF1R;PTPN1;MPIG6B;FLT3;FLT4;MVP;INSR;OSM;LMTK2;MERTK;NLRP12;IL1B;ROR2;RAF1;OPTN	.
	negative regulation of cytokine secretion (GO:0050710)	14885	0.014775	0.119922	0	0	2.52095	10.6253	PTGER4;IL10;SRGN;NLRP12;ANXA1;PPP1R11;C5AR2;ANXA4;FN1;FCGR2B	.
	negative regulation of ERK1 and ERK2 cascade (GO:0070373)	14885	0.014775	0.119922	0	0	2.52095	10.6253	LYN;PTPN1;PTPRR;RGS14;TNIP1;CNKSR3;SPRY1;SYNJ2BP;TLR4;PTPN2	.
	negative regulation of transport (GO:0051051)	14885	0.014775	0.119922	0	0	2.52095	10.6253	SNX3;LGALS3;ITGB3;IL1B;NR1H3;WWP2;NRG1;SNX33;CRYAB;RAB7A	.
	regulation of protein dephosphorylation (GO:0035304)	14885	0.014775	0.119922	0	0	2.52095	10.6253	PPP1R15A;PTPA;PPP1R11;SMPD1;DLC1;GBA;PRKCD;PPP2R5A;SPPL3;CALM2	.
	sphingolipid metabolic process (GO:0006665)	22/116	0.0149022	0.120728	0	0	1.77273	7.45653	CERS6;SGMS1;SPHK2;SPHK1;GBA;TEX2;CLN8;HACD2;SGPP1;PLA2G15;FUT7;ALDH3B1;SMPD1;PSAP;NEU1;ACER3;PPT1;ARSG;SPTSSA;ARSB;ST6GALNAC6;CERS2	.
	cholesterol homeostasis (GO:0042632)	13/58	0.0149978	0.120822	0	0	2.18578	9.17994	SCARB1;DGAT2;VDR;IL18;LPL;NR1H3;EHD1;NPC1;SOAT1;NPC2;LAMTOR1;CD24;LDLR	.
	sterol homeostasis (GO:0055092)	13/58	0.0149978	0.120822	0	0	2.18578	9.17994	SCARB1;DGAT2;VDR;IL18;LPL;NR1H3;EHD1;NPC1;SOAT1;NPC2;LAMTOR1;CD24;LDLR	.
	post-Golgi vesicle-mediated transport (GO:0006892)	13/58	0.0149978	0.120822	0	0	2.18578	9.17994	CHIC2;ARF1;SYS1;SORT1;EXOC6B;AP2A1;SORL1;VAMP8;STX4;STXBP6;CORO7;STEAP2;VTI1B	.
	pyruvate metabolic process (GO:0006090)	17107	0.0151416	0.121753	0	0	2.37724	9.96137	HK3;LDHB;LDHA;SDS;PKM;PGAM1;PGK1;HOGA1;ALDOA;SLC16A3;HK1	.
	negative regulation of protein phosphorylation (GO:0001933)	31/178	0.0152134	0.122103	0	0	1.5987	6.6915	MVP;PRKAG2;PRR5L;THY1;PRKCZ;SAMSN1;PPM1F;PREX1;SPRED1;DEPTOR;CHORDC1;SFN;DMD;SOCS6;XDH;LYN;CISH;SEMA4D;DUSP1;PRKCD;PAQR3;BGN;GP1BA;NYX;NLRP12;PARD3;DDIT4;CNKSR3;PTPN6;TRIB1;CALM2	.
	positive regulation of cytoskeleton organization (GO:0051495)	16/77	0.0154079	0.123435	0	0	1.98532	8.28449	VASP;TENM1;CARMIL1;WDR1;NUMA1;PLEK;RHOG;BAIAP2;PYCARD;HCK;FES;CDC42EP4;CDC42EP3;HCLS1;PTK2B;RAC1	.
	regulation of JNK cascade (GO:0046328)	18/90	0.015584	0.124011	0	0	1.8927	7.8765	NCF1;GADD45B;GADD45A;FLT4;CARD9;NOD2;TIRAP;GADD45G;PYCARD;SDCBP;PINK1;IL1B;PTK2B;RIPK1;LTBR;PLCB1;FCGR2B;MAP3K11	.
	regulation of neutrophil chemotaxis (GO:0090022)	44437	0.0155948	0.124011	0	0	2.88008	11.9835	BST1;CXCL8;C5AR2;RAC1;PPBP;CXCL5;TIRAP;JAM3	.
	positive regulation of transcription from RNA polymerase II promoter in response to stress (GO:0036003)	44437	0.0155948	0.124011	0	0	2.88008	11.9835	CEBPB;NOTCH1;MAPK7;DDIT3;SESN2;HSF4;ATF3;NFE2L2	.
	semaphorin-plexin signaling pathway (GO:0071526)	44437	0.0155948	0.124011	0	0	2.88008	11.9835	SEMA4A;SEMA7A;SEMA3C;SEMA4D;PLXNA2;PLXNB3;PLXNB2;RAC1	.
	positive regulation of programmed cell death (GO:0043068)	42/257	0.0158416	0.125743	0	0	1.48224	6.14405	RARG;CSRNP3;ITSN1;PSEN1;NLRC4;FGD1;BBC3;STK3;APH1A;ING4;FGD3;PTPA;PYCARD;PREX1;ADAMTSL4;TCTN3;UBC;ARL6IP5;MAP3K20;RIPK1;FADD;RAC1;ATG7;PHLDA3;ARHGEF11;BNIP3L;JUN;GADD45B;GADD45A;BNIP3;SIAH1;HIP1R;VAV1;GADD45G;DNM2;TIAM2;BCL6;STK17A;NEURL1;FAS;ARHGEF5;MAP3K11	.
	positive regulation of protein kinase activity (GO:0045860)	30/172	0.0164101	0.130016	0	0	1.60137	6.58142	CSF1R;CDKN1A;RALB;SRC;ITGB3;PRKAG2;CLU;CAMKK1;STK3;STK11;PAK1;IL12B;PTK2B;MARK2;MAP2K4;PTPN1;MAP3K3;MAP2K2;ACE;SLC11A1;INSR;PRKCD;PARP16;RHOA;EREG;STK24;IL23A;LCP2;CALM2;LTF	.
	extracellular matrix organization (GO:0030198)	38/229	0.0167022	0.131462	0	0	1.50904	6.1753	ELN;ITGB3;SERPINE1;ITGA2B;ITGB2;HTRA1;ICAM3;FURIN;LAMC1;F11R;THBS1;CTSS;SCUBE3;CAPNS1;CTSK;SH3PXD2B;TIMP2;CAPN2;FLOT1;ITGAX;ITGB7;CAPN1;WASHC1;JAM3;VWF;ITGA2;FN1;BGN;MMP8;MMP9;ADAM19;VCAN;BMP1;COL6A3;TGFBI;LCP1;CD44;ITGA9	.
	regulation of myeloid cell differentiation (GO:0045637)	14/65	0.0167143	0.131462	0	0	2.07717	8.49871	LYN;NFE2;SPI1;ITGA2B;GP1BA;THBS1;GATA1;LGALS3;KAT2B;MEIS1;CDK6;FES;PTK2B;MYL9	.
	cellular response to reactive oxygen species (GO:0034614)	14/65	0.0167143	0.131462	0	0	2.07717	8.49871	JUN;NCF1;MPV17L;TPM1;PRKCD;PXN;PKD2;MMP9;MAPK13;PRDX5;MAPK7;MAPK1;ROMO1;NFE2L2	.
	negative regulation of cell adhesion (GO:0007162)	14/65	0.0167143	0.131462	0	0	2.07717	8.49871	ACVRL1;CD164;ADAMDEC1;NOTCH1;SEMA4D;FZD4;SERPINE1;PTPRO;RHOA;PLXNA2;PLXNB3;PLXNB2;TGFBI;SIPA1	.
	carboxylic acid transmembrane transport (GO:1905039)	13028	0.0168943	0.132635	0	0	2.61738	10.681	SLC5A6;SLC6A6;SLC7A7;SLC7A8;SLC38A7;SLC16A7;SLC38A6;SLC25A10;SLC13A5	.
	cellular modified amino acid biosynthetic process (GO:0042398)	44401	0.0170576	0.132711	0	0	3.1124	12.6711	GATM;GSS;MGST2;PLOD3;PLOD1;GGT1;CNDP2	.
	intrinsic apoptotic signaling pathway in response to endoplasmic reticulum stress (GO:0070059)	44401	0.0170576	0.132711	0	0	3.1124	12.6711	PPP1R15A;CEBPB;DDIT3;CASP4;SELENOK;TANK;BBC3	.
	negative regulation of interleukin-6 production (GO:0032715)	44401	0.0170576	0.132711	0	0	3.1124	12.6711	IL10;ORM1;NLRP12;C5AR2;GBA;BPI;TLR4	.
	negative regulation of intrinsic apoptotic signaling pathway in response to DNA damage (GO:1902230)	44401	0.0170576	0.132711	0	0	3.1124	12.6711	CDKN2D;SNAI1;CLU;CD44;TPT1;ZNF385A;BCL2L1	.
	ATP generation from ADP (GO:0006757)	44401	0.0170576	0.132711	0	0	3.1124	12.6711	HK3;LDHA;PKM;PGAM1;PGK1;ALDOA;HK1	.
	regulation of protein catabolic process (GO:0042176)	18/91	0.0173642	0.134638	0	0	1.86667	7.56626	GSK3A;EGLN2;LRP1;SMURF1;PLK2;TNFSF12;FURIN;WWP2;OAZ1;SORL1;OAZ2;SNX3;HGS;HECW2;STX5;RILP;ATG7;RAB7A	.
	regulation of cellular metabolic process (GO:0031323)	15250	0.0175459	0.134638	0	0	2.43949	9.86271	ARF1;PINK1;NPC2;STK17A;GBA;PDK4;FLOT1;PDK3;BCO2;LAMTOR1	.
	peptide transport (GO:0015833)	15250	0.0175459	0.134638	0	0	2.43949	9.86271	ARRDC4;RAMP2;RAMP3;ZFYVE9;ARRDC1;TOM1;PPT1;MYH9;RILP;RAB7A	.
	modified amino acid transport (GO:0072337)	44330	0.0176483	0.134638	0	0	4.19758	16.9461	SLC5A6;SLC16A12;CTNS;FOLR3;FOLR2	.
	N-acetylglucosamine metabolic process (GO:0006044)	44330	0.0176483	0.134638	0	0	4.19758	16.9461	NAGK;AMDHD2;MGAT3;LARGE1;RENBP	.
	neutrophil activation (GO:0042119)	44330	0.0176483	0.134638	0	0	4.19758	16.9461	PREX1;CXCL8;FCER1G;PRKCD;CXCR2	.
	regulation of response to interferon-gamma (GO:0060330)	44330	0.0176483	0.134638	0	0	4.19758	16.9461	SOCS3;IFNGR1;IFNGR2;JAK2;PTPN2	.
	regulation of adaptive immune response (GO:0002819)	44330	0.0176483	0.134638	0	0	4.19758	16.9461	PYCARD;IRF1;FADD;FCGR2B;SAMSN1	.
	purine-containing compound catabolic process (GO:0072523)	44330	0.0176483	0.134638	0	0	4.19758	16.9461	GPX1;PNP;DPYD;NT5C2;XDH	.
	positive regulation of osteoclast differentiation (GO:0045672)	44330	0.0176483	0.134638	0	0	4.19758	16.9461	CCR1;ATP6AP1;IL23A;OCSTAMP;IL12B	.
	neurotransmitter biosynthetic process (GO:0042136)	44330	0.0176483	0.134638	0	0	4.19758	16.9461	MOXD1;DAGLA;DAGLB;SLC6A4;ALDH9A1	.
	calcium ion transport (GO:0006816)	22/118	0.0179802	0.13556	0	0	1.7356	6.97448	CCR1;RYR1;TRPC5;RAMP2;RAMP3;SLC24A3;SLC3A2;CACNA2D4;PSEN1;ATP2C2;PKD2;SELENOK;MCOLN1;SLC8A1;TMEM165;GRIN3A;P2RX4;CDH23;ORAI1;NMUR2;MICU1;TPT1	.
	regulation of sprouting angiogenesis (GO:1903670)	44366	0.0179888	0.13556	0	0	3.48793	14.0145	SMAD1;S100A1;E2F2;KLF4;SYNJ2BP;EPN2	.
	protein targeting to lysosome (GO:0006622)	44366	0.0179888	0.13556	0	0	3.48793	14.0145	SCARB2;HGS;LAMP2;CLU;SORL1;RAB7A	.
	sulfur compound transport (GO:0072348)	44366	0.0179888	0.13556	0	0	3.48793	14.0145	SLC5A6;SLC6A6;SLC25A19;SLC26A8;SLC25A10;SLC26A6	.
	cellular response to interleukin-7 (GO:0098761)	44366	0.0179888	0.13556	0	0	3.48793	14.0145	STAT5A;STAT5B;CISH;IL7;STAT3;JAK3	.
	interleukin-7-mediated signaling pathway (GO:0038111)	44366	0.0179888	0.13556	0	0	3.48793	14.0145	STAT5A;STAT5B;CISH;IL7;STAT3;JAK3	.
	negative regulation of cell junction assembly (GO:1901889)	44366	0.0179888	0.13556	0	0	3.48793	14.0145	ACVRL1;IKBKB;ACE;SRC;DLC1;THBS1	.
	negative regulation of cysteine-type endopeptidase activity (GO:2000117)	15/72	0.018193	0.13686	0	0	1.99145	7.97916	CDKN2D;GPX1;SRC;TNFRSF1B;KLF4;THBS1;SH3RF1;CST3;RPS6KA1;SFN;RAF1;NAIP;CD44;LTF;LAMTOR5	.
	sphingolipid biosynthetic process (GO:0030148)	14/66	0.0189965	0.142656	0	0	2.03711	8.07407	CERS6;SGMS1;SPHK2;SPHK1;GBA;CLN8;HACD2;SGPP1;SMPD1;ALDH3B1;ACER3;SPTSSA;LARGE1;CERS2	.
	multivesicular body assembly (GO:0036258)	44438	0.0191386	0.143224	0	0	2.74902	10.8752	HGS;VPS37C;CHMP2A;CHMP3;CHMP4B;VPS37B;RAB11A;CHMP5	.
	regulation of blood coagulation (GO:0030193)	44438	0.0191386	0.143224	0	0	2.74902	10.8752	FCER1G;TEC;SERPINE1;GP1BA;ADTRP;TFPI;F2;THBS1	.
	phosphatidylinositol metabolic process (GO:0046488)	21/112	0.019277	0.144011	0	0	1.74748	6.90052	ARF3;CSF1R;ARF1;PLA2G4F;MTMR3;MBOAT7;PLEK;ZFYVE21;PIK3CD;PLA2G4A;OCRL;BMX;PIK3R5;INPP5D;PI4KA;PLBD1;PIP5K1B;PIP5K1C;PLCB1;CDIPT;PI4K2A	.
	positive regulation of protein binding (GO:0032092)	13/60	0.0197119	0.147005	0	0	2.09253	8.21638	TCF7L2;RALB;LRP1;HFE;AKTIP;HIP1R;PSEN1;SPPL3;MMP9;TANK;TIRAP;STK3;FLOT1	.
	zymogen activation (GO:0031638)	13394	0.0202494	0.149978	0	0	2.5203	9.82823	ST14;KLK1;ASPH;PLAU;PGK1;CTSH;FURIN;FADD;GGT1	.
	endosome organization (GO:0007032)	13394	0.0202494	0.149978	0	0	2.5203	9.82823	SNX3;LAPTM4B;FAM160A2;AKTIP;SNX10;SNX33;LAMTOR1;RILP;PI4K2A	.
	acylglycerol metabolic process (GO:0006639)	13394	0.0202494	0.149978	0	0	2.5203	9.82823	GK5;PGS1;ABHD12;DGKD;DGAT2;GK;LPL;DGKZ;PNPLA2	.
	protein acylation (GO:0043543)	13394	0.0202494	0.149978	0	0	2.5203	9.82823	ING4;KAT2B;ZDHHC18;GTF2B;ZDHHC21;ZDHHC7;SELENOK;ZDHHC2;ZDHHC3	.
	positive regulation of immune response (GO:0050778)	20059	0.0202859	0.149991	0	0	2.1612	8.42398	PYCARD;IL23A;RIOK3;ITGB2;IL12B;FFAR2;STX4;LGALS9;NOD2;FADD;FCGR2B;EREG	.
	glycolipid biosynthetic process (GO:0009247)	15615	0.0206813	0.152393	0	0	2.36312	9.16542	DPM2;PIGB;DPM3;PGAP2;PIGN;ST3GAL4;LARGE1;PIGF;ABO;PIGH	.
	ceramide metabolic process (GO:0006672)	15615	0.0206813	0.152393	0	0	2.36312	9.16542	PLA2G15;FUT7;CERS6;SGMS1;SMPD1;GBA;SPTSSA;CLN8;ST6GALNAC6;CERS2	.
	organophosphate ester transport (GO:0015748)	44402	0.0213562	0.155025	0	0	2.93933	11.3059	SCARB1;PRELID1;SCP2;SLC25A19;NPC2;PITPNA;LDLR	.
	positive regulation of leukocyte mediated cytotoxicity (GO:0001912)	44402	0.0213562	0.155025	0	0	2.93933	11.3059	LAMP1;CADM1;IL23A;IL12B;SLAMF6;FADD;NECTIN2	.
	monocarboxylic acid catabolic process (GO:0072329)	44402	0.0213562	0.155025	0	0	2.93933	11.3059	PLA2G15;NUDT7;HOGA1;ACAA1;LPIN2;LPIN3;PPARD	.
	positive regulation of peptidyl-threonine phosphorylation (GO:0010800)	44402	0.0213562	0.155025	0	0	2.93933	11.3059	CEMIP;SPHK1;PLK1;PRKAG2;MAPK1;CHI3L1;CALM2	.
	signal transduction in response to DNA damage (GO:0042770)	44402	0.0213562	0.155025	0	0	2.93933	11.3059	GADD45A;MYO6;SESN2;BCL3;GRB2;MAPK14;NDRG1	.
	peptide catabolic process (GO:0043171)	44402	0.0213562	0.155025	0	0	2.93933	11.3059	GGT5;ACE2;ACE;RNPEPL1;CTSH;ECE1;GGT1	.
	proteolysis involved in cellular protein catabolic process (GO:0051603)	18/93	0.0213929	0.155025	0	0	1.81669	6.9846	HM13;CTSZ;NGLY1;CTSS;SCPEP1;PSMA6;UBE2W;CTSK;UBC;CAPN2;CTSH;CHMP4B;CTSF;SOCS6;CTSC;CTSB;ADAMTS7;LGMN	.
	vesicle organization (GO:0016050)	23/127	0.0218275	0.155025	0	0	1.67487	6.40569	SRGN;SYT4;ANXA2;STX17;SORT1;AKTIP;SNX10;SNX33;CORO1A;STX11;RPH3A;VAMP8;LAPTM4B;FAM160A2;SNX18;STX6;STX5;STX4;STX3;LAMTOR1;STX2;PI4K2A;PICALM	.
	superoxide anion generation (GO:0042554)	44296	0.021972	0.155025	0	0	5.0358	19.2266	NCF1;NCF2;ALOX12;CYBA	.
	response to laminar fluid shear stress (GO:0034616)	44296	0.021972	0.155025	0	0	5.0358	19.2266	MAPK7;KLF4;ASS1;NFE2L2	.
	positive regulation of bone remodeling (GO:0046852)	44296	0.021972	0.155025	0	0	5.0358	19.2266	DCSTAMP;ATP6AP1;PLEKHM1;DEF8	.
	creatine metabolic process (GO:0006600)	44296	0.021972	0.155025	0	0	5.0358	19.2266	STAT5A;STAT5B;GATM;CKB	.
	regulation of granulocyte differentiation (GO:0030852)	44296	0.021972	0.155025	0	0	5.0358	19.2266	TESC;RARA;HCLS1;EVI2B	.
	positive regulation of natural killer cell activation (GO:0032816)	44296	0.021972	0.155025	0	0	5.0358	19.2266	LAMP1;IL23A;IL18;IL12B	.
	negative regulation of B cell proliferation (GO:0030889)	44296	0.021972	0.155025	0	0	5.0358	19.2266	LYN;IL10;CD300A;FCGR2B	.
	endosomal vesicle fusion (GO:0034058)	44296	0.021972	0.155025	0	0	5.0358	19.2266	SAMD9;VPS41;ANKFY1;VPS39	.
	regulation of podosome assembly (GO:0071801)	44296	0.021972	0.155025	0	0	5.0358	19.2266	HCK;GSN;SRC;LCP1	.
	positive regulation of bone resorption (GO:0045780)	44296	0.021972	0.155025	0	0	5.0358	19.2266	DCSTAMP;ATP6AP1;PLEKHM1;DEF8	.
	negative regulation of transcription from RNA polymerase II promoter in response to stress (GO:0097201)	44296	0.021972	0.155025	0	0	5.0358	19.2266	DNAJB1;JUN;BAG3;CITED2	.
	T cell homeostasis (GO:0043029)	44296	0.021972	0.155025	0	0	5.0358	19.2266	TNFSF14;PPP2R3C;FADD;JAK3	.
	positive regulation of adaptive immune response based on somatic recombination of immune receptors built from immunoglobulin superfamily domains (GO:0002824)	44296	0.021972	0.155025	0	0	5.0358	19.2266	IL23A;IL1B;SLC11A1;IL12B	.
	regulation of plasminogen activation (GO:0010755)	44296	0.021972	0.155025	0	0	5.0358	19.2266	SERPINE1;CTSZ;ENO1;THBS1	.
	positive regulation of type 2 immune response (GO:0002830)	44296	0.021972	0.155025	0	0	5.0358	19.2266	RARA;IL18;NOD2;PRKCZ	.
	cellular biogenic amine metabolic process (GO:0006576)	44296	0.021972	0.155025	0	0	5.0358	19.2266	MAOA;SMS;OAZ1;OAZ2	.
	response to acidic pH (GO:0010447)	44296	0.021972	0.155025	0	0	5.0358	19.2266	CHORDC1;PKD1L3;CTSS;RAB11FIP5	.
	L-glutamate transport (GO:0015813)	44296	0.021972	0.155025	0	0	5.0358	19.2266	PRAF2;SLC1A1;ARL6IP5;SLC25A13	.
	defense response to bacterium (GO:0042742)	39/241	0.0225172	0.157539	0	0	1.46412	5.55411	PGLYRP4;RAB1A;CEBPB;PGLYRP2;PPP1R11;SERPINE1;HMGB2;DEFB1;NOD1;NOD2;NLRC4;CFP;PYCARD;STAB1;IL12B;S100A12;ROMO1;NLRP1;LBP;PGLYRP1;IL6R;GSDMD;FCER1G;ANXA3;SLC11A1;PRKCD;LYZ;TIRAP;SELP;FGR;IL23A;DEFB4A;TLR4;S100A9;OPTN;S100A8;MYD88;TLR2;LTF	.
	Arp2/3 complex-mediated actin nucleation (GO:0034314)	44367	0.0232121	0.157539	0	0	3.23861	12.1871	ACTR3;ARPC3;ARPC1B;ARPC4;ARPC5;WASHC1	.
	multivesicular body organization (GO:0036257)	44439	0.0232209	0.157539	0	0	2.62934	9.89344	HGS;VPS37C;CHMP2A;CHMP3;CHMP4B;VPS37B;RAB11A;CHMP5	.
	negative regulation of blood vessel endothelial cell migration (GO:0043537)	44439	0.0232209	0.157539	0	0	2.62934	9.89344	ACVRL1;HDAC5;CARD10;NOTCH1;PPARG;KLF4;THBS1;RHOA	.
	phagocytosis (GO:0006909)	24/135	0.0239244	0.157539	0	0	1.63753	6.11267	SCARB2;ANXA1;GSN;LRP1;ANXA3;SLC11A1;ITGB3;ITGB2;ANXA11;NR1H3;MERTK;CORO1A;ARHGAP25;ARHGAP12;BIN2;ADORA2A;RARA;MYH9;PIP5K1C;CD14;CD302;FCGR1A;FCGR2B;DOCK1	.
	substrate-dependent cell migration (GO:0006929)	44331	0.0239719	0.157539	0	0	3.77761	14.0938	SDCBP;SHTN1;OPHN1;ITGA2;ANKS1A	.
	glycerophospholipid catabolic process (GO:0046475)	44331	0.0239719	0.157539	0	0	3.77761	14.0938	PLA2G15;ABHD12;ENPP2;PNPLA6;GPCPD1	.
	regulation of clathrin-dependent endocytosis (GO:2000369)	44331	0.0239719	0.157539	0	0	3.77761	14.0938	TNK2;HIP1R;BMP2K;ARAP3;PICALM	.
	pyrimidine nucleoside metabolic process (GO:0006213)	44331	0.0239719	0.157539	0	0	3.77761	14.0938	NT5C3A;DPYS;DPYD;ACOD1;UPP1	.
	negative regulation of release of cytochrome c from mitochondria (GO:0090201)	44331	0.0239719	0.157539	0	0	3.77761	14.0938	PRELID1;GPX1;NOL3;CLU;BCL2L1	.
	cellular response to virus (GO:0098586)	44331	0.0239719	0.157539	0	0	3.77761	14.0938	ARF1;RIOK3;VWCE;LGALS9;MAPK14	.
	negative regulation of muscle cell differentiation (GO:0051148)	44331	0.0239719	0.157539	0	0	3.77761	14.0938	NOTCH1;RBPMS2;FOXO4;ANKRD2;EREG	.
	positive regulation of viral release from host cell (GO:1902188)	44331	0.0239719	0.157539	0	0	3.77761	14.0938	PC;CHMP2A;CHMP3;CHMP4B;VPS37B	.
	negative regulation of viral entry into host cell (GO:0046597)	44331	0.0239719	0.157539	0	0	3.77761	14.0938	IFITM3;FCN1;SNX3;IFITM1;GSN	.
	filopodium assembly (GO:0046847)	44331	0.0239719	0.157539	0	0	3.77761	14.0938	FGD3;DNM3;FGD6;SRGAP2;FGD1	.
	positive regulation of exosomal secretion (GO:1903543)	44331	0.0239719	0.157539	0	0	3.77761	14.0938	SDCBP;SDC4;HGS;CHMP2A;RAB7A	.
	negative regulation of protein processing (GO:0010955)	44331	0.0239719	0.157539	0	0	3.77761	14.0938	TMEM59;SERPINE1;CTSZ;THBS1;CD55	.
	positive regulation of alpha-beta T cell activation (GO:0046635)	44331	0.0239719	0.157539	0	0	3.77761	14.0938	HSPH1;PNP;IL23A;IL12B;CD55	.
	positive regulation of smooth muscle cell proliferation (GO:0048661)	13759	0.0240593	0.157539	0	0	2.43015	9.05774	IL10;JUN;RBPMS2;IL18;HMOX1;THBS1;IL6R;MMP9;EREG	.
	positive regulation of stress fiber assembly (GO:0051496)	13759	0.0240593	0.157539	0	0	2.43015	9.05774	CARMIL1;PAK1;FHOD1;PXN;TPM1;RAC1;PPM1F;RHOA;ARHGEF5	.
	substantia nigra development (GO:0021762)	15980	0.0242059	0.157539	0	0	2.29138	8.5266	G6PD;CNP;BASP1;S100A1;MBP;CKB;CALM2;ACTB;RHOA;COX6B1	.
	negative regulation of membrane potential (GO:0045837)	44261	0.0243715	0.157539	0	0	7.55175	28.0498	PRELID1;BNIP3;ARL6IP5	.
	arginine biosynthetic process (GO:0006526)	44261	0.0243715	0.157539	0	0	7.55175	28.0498	ACOD1;NAGS;ASS1	.
	negative regulation of transforming growth factor beta production (GO:0071635)	44261	0.0243715	0.157539	0	0	7.55175	28.0498	LAPTM4B;FURIN;CD24	.
	regulation of lymphocyte apoptotic process (GO:0070228)	44261	0.0243715	0.157539	0	0	7.55175	28.0498	LYN;LGALS3;JAK3	.
	positive regulation of myelination (GO:0031643)	44261	0.0243715	0.157539	0	0	7.55175	28.0498	RNF10;MYRF;PARD3	.
	N-acetylneuraminate catabolic process (GO:0019262)	44261	0.0243715	0.157539	0	0	7.55175	28.0498	NAGK;AMDHD2;RENBP	.
	amino sugar catabolic process (GO:0046348)	44261	0.0243715	0.157539	0	0	7.55175	28.0498	NAGK;AMDHD2;RENBP	.
	positive regulation of granulocyte differentiation (GO:0030854)	44261	0.0243715	0.157539	0	0	7.55175	28.0498	TESC;HCLS1;EVI2B	.
	membrane raft assembly (GO:0001765)	44261	0.0243715	0.157539	0	0	7.55175	28.0498	ANXA2;FLOT1;FLOT2	.
	negative regulation of interferon-gamma-mediated signaling pathway (GO:0060336)	44261	0.0243715	0.157539	0	0	7.55175	28.0498	NR1H3;PPARG;PTPN2	.
	citrate metabolic process (GO:0006101)	44261	0.0243715	0.157539	0	0	7.55175	28.0498	STAT5A;STAT5B;ACO1	.
	negative regulation of response to interferon-gamma (GO:0060331)	44261	0.0243715	0.157539	0	0	7.55175	28.0498	NR1H3;PPARG;PTPN2	.
	positive regulation of T-helper 2 cell differentiation (GO:0045630)	44261	0.0243715	0.157539	0	0	7.55175	28.0498	RARA;IL18;PRKCZ	.
	regulation of blood vessel remodeling (GO:0060312)	44261	0.0243715	0.157539	0	0	7.55175	28.0498	CST3;FLT4;TMBIM1	.
	negative regulation of leukocyte degranulation (GO:0043301)	44261	0.0243715	0.157539	0	0	7.55175	28.0498	CD300A;LGALS9;FCGR2B	.
	regulation of response to wounding (GO:1903034)	44261	0.0243715	0.157539	0	0	7.55175	28.0498	IL10;STK24;PLAU	.
	purine ribonucleoside monophosphate catabolic process (GO:0009169)	44261	0.0243715	0.157539	0	0	7.55175	28.0498	AMPD3;HPRT1;NUDT3	.
	positive regulation of cholesterol storage (GO:0010886)	44261	0.0243715	0.157539	0	0	7.55175	28.0498	EHD1;SCARB1;LPL	.
	regulation of interleukin-10 secretion (GO:2001179)	44261	0.0243715	0.157539	0	0	7.55175	28.0498	PYCARD;LGALS9;PRKCZ	.
	positive regulation of phospholipid transport (GO:2001140)	44261	0.0243715	0.157539	0	0	7.55175	28.0498	PRELID1;PRKCD;ABCA7	.
	regulation of inositol phosphate biosynthetic process (GO:0010919)	44261	0.0243715	0.157539	0	0	7.55175	28.0498	PLEK;PTK2B;CD244	.
	positive regulation of antigen processing and presentation (GO:0002579)	44261	0.0243715	0.157539	0	0	7.55175	28.0498	SLC11A1;NOD1;NOD2	.
	positive regulation of megakaryocyte differentiation (GO:0045654)	44261	0.0243715	0.157539	0	0	7.55175	28.0498	TESC;HMGB2;RAB7B	.
	regulation of natural killer cell proliferation (GO:0032817)	44261	0.0243715	0.157539	0	0	7.55175	28.0498	IL23A;IL18;IL12B	.
	negative regulation of smooth muscle cell differentiation (GO:0051151)	44261	0.0243715	0.157539	0	0	7.55175	28.0498	RBPMS2;FOXO4;EREG	.
	peptidyl-serine autophosphorylation (GO:0036289)	44261	0.0243715	0.157539	0	0	7.55175	28.0498	PINK1;MAP2K2;RIPK1	.
	positive regulation of dendritic cell antigen processing and presentation (GO:0002606)	44261	0.0243715	0.157539	0	0	7.55175	28.0498	SLC11A1;NOD1;NOD2	.
	peptidyl-proline hydroxylation (GO:0019511)	44261	0.0243715	0.157539	0	0	7.55175	28.0498	EGLN3;EGLN2;P4HB	.
	polyamine biosynthetic process (GO:0006596)	44261	0.0243715	0.157539	0	0	7.55175	28.0498	SMOX;SMS;SAT1	.
	granzyme-mediated apoptotic signaling pathway (GO:0008626)	44261	0.0243715	0.157539	0	0	7.55175	28.0498	SRGN;LAMP1;BNIP3	.
	regulation of endothelial cell development (GO:1901550)	44261	0.0243715	0.157539	0	0	7.55175	28.0498	IKBKB;IL1B;TNFRSF1A	.
	T-helper 17 cell lineage commitment (GO:0072540)	44261	0.0243715	0.157539	0	0	7.55175	28.0498	STAT3;SLAMF6;LY9	.
	positive regulation of receptor binding (GO:1900122)	44261	0.0243715	0.157539	0	0	7.55175	28.0498	ANXA2;HFE;MMP9	.
	regulation of MHC class I biosynthetic process (GO:0045343)	44261	0.0243715	0.157539	0	0	7.55175	28.0498	NLRP12;HSPH1;NLRC5	.
	phagosome-lysosome fusion (GO:0090385)	44261	0.0243715	0.157539	0	0	7.55175	28.0498	RAB20;RAB7B;RAB7A	.
	regulation of cytokine production (GO:0001817)	20/108	0.0248907	0.160655	0	0	1.72056	6.35446	LYN;NLRX1;ANXA1;SLC11A1;NFAM1;NOD1;DDX41;NOD2;MAPK14;EREG;CCDC88B;ACE2;NLRP12;MAPKAPK2;UBC;FLOT1;IL12B;IGF2BP2;ICOSLG;LTF	.
	regulation of actin filament-based process (GO:0032970)	13/62	0.0254574	0.163823	0	0	2.00689	7.36679	LRP1;PRKCD;TWF2;HIP1R;ARHGAP28;BAIAP2;CORO1A;RHOA;CNN2;BST1;DLC1;RHOQ;ARHGEF5	.
	regulation of T cell proliferation (GO:0042129)	13/62	0.0254574	0.163823	0	0	2.00689	7.36679	IL10;CEBPB;ANXA1;SDC4;CLECL1;IL27;CCDC88B;LGALS3;PNP;IL23A;IL1B;IL12B;JAK3	.
	regulation of actin cytoskeleton organization (GO:0032956)	15/75	0.025753	0.165478	0	0	1.89155	6.92158	CSF1R;LRP1;PRKCD;TWF2;HIP1R;ARHGAP28;F11R;BAIAP2;CORO1A;RHOA;BST1;DLC1;PTK2B;RHOQ;ARHGEF5	.
	regulation of macromolecule metabolic process (GO:0060255)	23/129	0.0258136	0.165621	0	0	1.64308	6.00852	SRPK2;IL10;SRPK3;ARF1;NLRX1;MTMR3;LRP1;SORT1;NOD1;NOD2;MAPK14;CDK11B;AFF2;MAPK13;NLRP12;DDX39A;CDK6;MAPK7;FLOT1;MAPK1;ALPK3;LAMTOR1;LDLR	.
	negative chemotaxis (GO:0050919)	44403	0.0263514	0.168322	0	0	2.78447	10.125	SEMA4A;SEMA7A;SEMA3C;SEMA4D;ITGB3;SLIT3;RHOA	.
	positive regulation of release of cytochrome c from mitochondria (GO:0090200)	44403	0.0263514	0.168322	0	0	2.78447	10.125	PYCARD;PINK1;BIK;BNIP3;PLAUR;MMP9;BBC3	.
	GPI anchor metabolic process (GO:0006505)	44403	0.0263514	0.168322	0	0	2.78447	10.125	DPM2;PIGB;DPM3;PGAP2;PIGN;PIGF;PIGH	.
	organonitrogen compound catabolic process (GO:1901565)	20790	0.0265601	0.169404	0	0	2.06273	7.48428	PLA2G15;RIDA;ACE;RNPEPL1;SIAH1;ENPP2;PPT1;COMT;CYP3A4;CLN8;CTSD;PGA5	.
	negative regulation of protein kinase activity (GO:0006469)	20/109	0.0272419	0.173366	0	0	1.70113	6.12916	PTPN1;CDKN1A;CISH;MVP;BGN;PRKAG2;GP1BA;ADARB1;THY1;NYX;SORL1;PPM1F;PYCARD;PREX1;SPRED1;DEPTOR;CHORDC1;SFN;TRIB1;SOCS6	.
	regulation of innate immune response (GO:0045088)	14/69	0.0272617	0.173366	0	0	1.92566	6.93677	IFNAR2;PTPN1;RIOK3;STAT2;ACOD1;TRAFD1;TYK2;TIRAP;EREG;FGR;IRF1;PTPN6;CD36;FCGR2B	.
	wound healing (GO:0042060)	18568	0.0274916	0.174571	0	0	2.13294	7.66551	SCARB1;PAK1;JAML;ITGB3;SLC11A1;TPM1;HMOX1;NRG1;RAF1;EREG;DCBLD2	.
	tumor necrosis factor-mediated signaling pathway (GO:0033209)	22/123	0.0278548	0.175477	0	0	1.64921	5.9054	TNFSF14;TNFSF12;TNFSF13;TNFRSF1B;TANK;TXNDC17;TNFSF13B;TNFRSF1A;PYCARD;NFKBIA;IKBKB;PSMA6;PSMD6;UBC;TNFSF9;PTK2B;FAS;RIPK1;LTBR;JAK2;CARD14;RELT	.
	cellular response to amino acid stimulus (GO:0071230)	11902	0.0278779	0.175477	0	0	2.51965	9.02013	SESN2;NEURL1;CAPN2;LAMTOR2;LAMTOR1;LAMTOR3;CPEB4;LAMTOR5	.
	cellular response to glucagon stimulus (GO:0071377)	11902	0.0278779	0.175477	0	0	2.51965	9.02013	GNG10;GNG2;GNG5;GNG4;GNG7;GNB2;GNG11;ADCY6	.
	GPI anchor biosynthetic process (GO:0006506)	11902	0.0278779	0.175477	0	0	2.51965	9.02013	DPM2;PIGB;DPM3;PGAP2;PIGN;PLAUR;PIGF;PIGH	.
	mitochondrial transmembrane transport (GO:1990542)	11902	0.0278779	0.175477	0	0	2.51965	9.02013	CPT1A;SMDT1;AGK;UCP2;PRKAG2;SLC25A20;MICU1;SLC25A33	.
	ceramide biosynthetic process (GO:0046513)	11902	0.0278779	0.175477	0	0	2.51965	9.02013	CERS6;SGMS1;SMPD1;GBA;SPTSSA;CLN8;ST6GALNAC6;CERS2	.
	regulation of smooth muscle cell proliferation (GO:0048660)	16346	0.0281427	0.176116	0	0	2.22386	7.94023	TCF7L2;RBPMS2;IL18;HMOX1;IL12B;PPARG;TRIB1;THBS1;IL6R;EREG	.
	positive regulation of actin filament bundle assembly (GO:0032233)	16346	0.0281427	0.176116	0	0	2.22386	7.94023	CARMIL1;PAK1;FHOD1;PXN;PLEK;TPM1;RAC1;PPM1F;RHOA;ARHGEF5	.
	cholesterol transport (GO:0030301)	16346	0.0281427	0.176116	0	0	2.22386	7.94023	SCARB1;STARD3;STARD5;NPC1;SOAT1;NPC2;ABCA7;CD36;CLU;LDLR	.
	negative regulation of immune system process (GO:0002683)	16346	0.0281427	0.176116	0	0	2.22386	7.94023	LYN;NLRP12;NLRX1;TSC22D3;HMOX1;NOD1;NOD2;FADD;FCGR2B;SMPDL3B	.
	positive regulation of neuron death (GO:1901216)	14124	0.0283523	0.177171	0	0	2.34622	8.35969	SRPK2;DDIT3;DDIT4;ZNF746;FCGR2B;CLU;TLR4;PICALM;CDK5R1	.
	COPII vesicle coating (GO:0048208)	13/63	0.0287528	0.178897	0	0	1.96664	6.97964	GRIA1;RAB1A;MCFD2;PEF1;RAB1B;CTSZ;TGFA;AREG;TFG;STX5;CD59;CTSC;BET1	.
	vesicle targeting, rough ER to cis-Golgi (GO:0048207)	13/63	0.0287528	0.178897	0	0	1.96664	6.97964	GRIA1;RAB1A;MCFD2;PEF1;RAB1B;CTSZ;TGFA;AREG;TFG;STX5;CD59;CTSC;BET1	.
	vesicle coating (GO:0006901)	13/63	0.0287528	0.178897	0	0	1.96664	6.97964	GRIA1;RAB1A;MCFD2;PEF1;RAB1B;CTSZ;TGFA;AREG;TFG;STX5;CD59;CTSC;BET1	.
	positive regulation of angiogenesis (GO:0045766)	19/103	0.0293196	0.181904	0	0	1.71201	6.04255	SMAD1;ECM1;RAMP2;CXCL8;BTG1;HSPB6;S100A1;ANXA3;TNFSF12;SPHK1;SERPINE1;SIRT6;KLF4;THBS1;HYAL1;IL1B;HMOX1;CTSH;CHI3L1	.
	cortical actin cytoskeleton organization (GO:0030866)	44368	0.0293625	0.181904	0	0	3.02253	10.6636	IKBKB;FMNL1;PLEK;RAB13;WAS;RHOQ	.
	positive regulation of leukocyte cell-cell adhesion (GO:1903039)	44368	0.0293625	0.181904	0	0	3.02253	10.6636	CCDC88B;PYCARD;SIRPA;THY1;SIRPB1;CD44	.
	protein stabilization (GO:0050821)	26/152	0.0301224	0.185065	0	0	1.56282	5.47375	CDKN1A;HIP1;CLU;STK3;LAMP1;TMEM88;CHORDC1;LAMP2;FLOT1;CDC37L1;FLOT2;ZSWIM7;GOLGA7;HSP90AA1;FKBPL;UBE2B;TESC;PRKCD;HIP1R;ATP1B3;HYPK;PINK1;PRKRA;TNIP2;CRYAB;GAPDH	.
	peptidyl-serine phosphorylation (GO:0018105)	25/145	0.0302607	0.185065	0	0	1.5777	5.51865	PRKCZ;CAMKK1;IKBKB;STK11;GRK2;MKNK1;PDK3;STK38L;MAPK1;RIPK1;MAP2K2;NEK6;PLK2;PRKCD;PLK1;LMTK2;CSNK1E;MAPK14;MAPK13;PINK1;MAPKAPK3;MAPKAPK2;ULK1;SGK1;CDK5R1	.
	protein ubiquitination involved in ubiquitin-dependent protein catabolic process (GO:0042787)	14/70	0.0305309	0.185065	0	0	1.89117	6.59832	SMURF1;RNF19B;BTBD11;WWP2;RNF5;RMND5B;ABTB2;RNF144B;SPSB2;MAEA;HECW2;RNF217;ARIH2;ELOC	.
	protein tetramerization (GO:0051262)	17/90	0.0308345	0.185065	0	0	1.76221	6.13093	RYR1;CDA;ANXA2;GPX3;DPYS;HM13;INSR;PKD2;MCOLN1;SOD2;CRYZ;RXRA;CTH;HPRT1;ALDOA;TGM3;KCNJ2	.
	interleukin-27-mediated signaling pathway (GO:0070106)	44297	0.0313861	0.185065	0	0	4.31616	14.9399	STAT3;IL27;TYK2;JAK2	.
	negative regulation of leukocyte activation (GO:0002695)	44297	0.0313861	0.185065	0	0	4.31616	14.9399	CD300A;NR1H3;BPI;FCGR2B	.
	regulation of myeloid leukocyte mediated immunity (GO:0002886)	44297	0.0313861	0.185065	0	0	4.31616	14.9399	LYN;FES;STXBP2;UNC13D	.
	nitric oxide biosynthetic process (GO:0006809)	44297	0.0313861	0.185065	0	0	4.31616	14.9399	GCHFR;ARG2;GCH1;DDAH2	.
	mononuclear cell differentiation (GO:1903131)	44297	0.0313861	0.185065	0	0	4.31616	14.9399	CSF1R;PIR;MYH9;PPARG	.
	relaxation of cardiac muscle (GO:0055119)	44297	0.0313861	0.185065	0	0	4.31616	14.9399	RGS2;P2RX4;KCNJ2;SLC8A1	.
	monocyte differentiation (GO:0030224)	44297	0.0313861	0.185065	0	0	4.31616	14.9399	CSF1R;PIR;MYH9;PPARG	.
	relaxation of muscle (GO:0090075)	44297	0.0313861	0.185065	0	0	4.31616	14.9399	RGS2;P2RX4;KCNJ2;SLC8A1	.
	arginine metabolic process (GO:0006525)	44297	0.0313861	0.185065	0	0	4.31616	14.9399	DDAH2;ACOD1;NAGS;ASS1	.
	cellular response to increased oxygen levels (GO:0036295)	44297	0.0313861	0.185065	0	0	4.31616	14.9399	ATP6AP1;FAS;ATP6V0D1;ATG7	.
	carbohydrate phosphorylation (GO:0046835)	44297	0.0313861	0.185065	0	0	4.31616	14.9399	FGGY;ITPK1;RBKS;HK1	.
	hemidesmosome assembly (GO:0031581)	44297	0.0313861	0.185065	0	0	4.31616	14.9399	CD151;KRT5;LAMC1;PLEC	.
	glutathione biosynthetic process (GO:0006750)	44297	0.0313861	0.185065	0	0	4.31616	14.9399	GSS;MGST2;GGT1;CNDP2	.
	regulation of symbiosis, encompassing mutualism through parasitism (GO:0043903)	44297	0.0313861	0.185065	0	0	4.31616	14.9399	CXCL8;CHMP2A;CHMP3;CHMP4B	.
	positive regulation of T-helper cell differentiation (GO:0045624)	44297	0.0313861	0.185065	0	0	4.31616	14.9399	ANXA1;RARA;IL18;PRKCZ	.
	UDP-N-acetylglucosamine biosynthetic process (GO:0006048)	44297	0.0313861	0.185065	0	0	4.31616	14.9399	NAGK;AMDHD2;UAP1;RENBP	.
	protein localization to pre-autophagosomal structure (GO:0034497)	44297	0.0313861	0.185065	0	0	4.31616	14.9399	STX17;ATG9A;WIPI1;WDR45	.
	negative regulation of bone mineralization (GO:0030502)	44297	0.0313861	0.185065	0	0	4.31616	14.9399	CCR1;SRGN;ECM1;PTK2B	.
	pyrimidine nucleoside catabolic process (GO:0046135)	44297	0.0313861	0.185065	0	0	4.31616	14.9399	NT5C3A;DPYS;DPYD;UPP1	.
	intrinsic apoptotic signaling pathway in response to oxidative stress (GO:0008631)	44297	0.0313861	0.185065	0	0	4.31616	14.9399	STK24;PRKCD;ARL6IP5;PRODH	.
	cell-substrate junction assembly (GO:0007044)	44297	0.0313861	0.185065	0	0	4.31616	14.9399	CD151;KRT5;LAMC1;PLEC	.
	myeloid cell activation involved in immune response (GO:0002275)	44297	0.0313861	0.185065	0	0	4.31616	14.9399	PYCARD;SBNO2;FCER1G;LBP	.
	positive regulation of developmental growth (GO:0048639)	18933	0.0314679	0.185065	0	0	2.0795	7.19253	CPNE9;SHTN1;SYT4;SEMA7A;UNC13A;CPNE5;SEMA4D;SMURF1;INSR;TWF2;PLCB1	.
	glucose transmembrane transport (GO:1904659)	44332	0.0315871	0.185065	0	0	3.434	11.8645	SLC2A9;SLC2A3;PPBP;SLC2A8;PPARD	.
	glucose 6-phosphate metabolic process (GO:0051156)	44332	0.0315871	0.185065	0	0	3.434	11.8645	G6PD;TALDO1;PGD;RBKS;DERA	.
	cytoplasmic sequestering of transcription factor (GO:0042994)	44332	0.0315871	0.185065	0	0	3.434	11.8645	IL10;NFKBIA;MXI1;PKD2;NFKBIE	.
	regulation of exosomal secretion (GO:1903541)	44332	0.0315871	0.185065	0	0	3.434	11.8645	SDCBP;SDC4;HGS;CHMP2A;RAB7A	.
	stabilization of membrane potential (GO:0030322)	44332	0.0315871	0.185065	0	0	3.434	11.8645	KCNK7;KCNK13;KCNK16;KCNK17;KCNK2	.
	cellular response to pH (GO:0071467)	44332	0.0315871	0.185065	0	0	3.434	11.8645	HYAL1;CHORDC1;PKD1L3;MCOLN1;RAB11FIP5	.
	positive regulation of myotube differentiation (GO:0010831)	44332	0.0315871	0.185065	0	0	3.434	11.8645	CD53;EHD1;EHD2;FLOT1;MAPK14	.
	positive regulation of triglyceride metabolic process (GO:0090208)	44332	0.0315871	0.185065	0	0	3.434	11.8645	SCARB1;NR1H3;ABHD5;LDLR;PNPLA2	.
	G-protein coupled acetylcholine receptor signaling pathway (GO:0007213)	44332	0.0315871	0.185065	0	0	3.434	11.8645	GRK2;GNA11;RGS10;PLCB1;CDK5R1	.
	positive regulation of leukocyte activation (GO:0002696)	44332	0.0315871	0.185065	0	0	3.434	11.8645	TNIP2;LBP;THBS1;TLR4;NECTIN2	.
	ruffle organization (GO:0031529)	44332	0.0315871	0.185065	0	0	3.434	11.8645	CSF1R;CARMIL1;PLEK;TPM1;RAC1	.
	myoblast differentiation (GO:0045445)	44332	0.0315871	0.185065	0	0	3.434	11.8645	TCF7L2;DDX5;SOX15;NRG1;ANKRD2	.
	fibrinolysis (GO:0042730)	44332	0.0315871	0.185065	0	0	3.434	11.8645	PLAU;SERPINE1;PLAUR;GP1BA;F2	.
	peptide metabolic process (GO:0006518)	19/104	0.0320739	0.186976	0	0	1.69178	5.81923	GSTM3;G6PD;HSP90AA1;ACE;GPX1;RNPEPL1;HM13;GSR;MGST1;CTNS;FURIN;PSEN1;F2;SPPL3;BGLAP;ETHE1;LAMP2;DMD;SEC11A	.
	regulation of extrinsic apoptotic signaling pathway in absence of ligand (GO:2001239)	44404	0.0320864	0.186976	0	0	2.64509	9.09733	RET;MAPK7;EYA3;IL1B;GATA1;MCL1;BCL2L1	.
	regulation of protein localization to cell surface (GO:2000008)	44404	0.0320864	0.186976	0	0	2.64509	9.09733	HFE;STX4;TAX1BP3;SNX33;STX3;RAB11FIP5;PICALM	.
	leukocyte cell-cell adhesion (GO:0007159)	44404	0.0320864	0.186976	0	0	2.64509	9.09733	SELP;SEMA4D;TNIP1;ITGB2;CLECL1;SELE;FERMT3	.
	glycerophospholipid metabolic process (GO:0006650)	13/64	0.0323484	0.187995	0	0	1.92797	6.61523	CSF1R;PIGN;AGK;PLEK;GPCPD1;ABHD12;PLA2G15;DPM2;PIGB;PNPLA6;PLCB1;PIGF;PIGH	.
	glucose metabolic process (GO:0006006)	13/64	0.0323484	0.187995	0	0	1.92797	6.61523	GPI;PGAM1;GAA;ENO1;PC;PGK1;ALDOC;SLC25A10;ALDOA;SLC25A11;GAPDH;SLC25A13;PPARD	.
	protein polymerization (GO:0051258)	16711	0.0325138	0.188703	0	0	2.1602	7.40104	PREX1;CATIP;GSN;GPX4;CHMP2A;CHMP3;RAC1;CORO7;JAK2;MSRB1	.
	protein dephosphorylation (GO:0006470)	22/125	0.0327916	0.190059	0	0	1.617	5.52623	PPP1R15A;PTPN1;PTPRR;MTMR3;DUSP1;PPM1M;EYA3;PTPRO;DAPP1;PPP2R5A;PPM1D;PPM1F;PTPRE;SDHAF2;CTDSP1;CTDSP2;PTPN9;PTPN6;BTRC;PPEF1;PTPN5;PTPN2	.
	positive regulation of cell-cell adhesion (GO:0022409)	12267	0.0331424	0.19165	0	0	2.41872	8.24045	IL10;CITED2;IL1B;FLOT1;SIRPA;THY1;SIRPB1;CD44	.
	clathrin-dependent endocytosis (GO:0072583)	14489	0.0331548	0.19165	0	0	2.26788	7.72569	OPHN1;ITSN1;CLTB;AP2S1;CLTA;AP2A1;PIP5K1C;AP2A2;PICALM	.
	positive regulation of cell growth (GO:0030307)	18/98	0.0345665	0.199543	0	0	1.70266	5.72922	CPNE9;SYT4;SEMA7A;UNC13A;CPNE5;SEMA4D;SMURF1;SPHK1;TWF2;DERL2;CXCL16;SHTN1;SDCBP;HYAL1;RPS6KA1;S100A9;SLC25A33;S100A8	.
	negative regulation of sequence-specific DNA binding transcription factor activity (GO:0043433)	24/140	0.0352808	0.203395	0	0	1.5665	5.23904	HDAC4;TCF7L2;NLRX1;ANXA4;NLRC5;ACOD1;NOD1;WWP2;NOD2;KLF4;PYCARD;ADGRG3;NFKBIA;NLRP12;IRAK1;IRAK2;DDIT3;CHORDC1;ID1;PIM1;RBCK1;BTRC;TRIB1;CMKLR1	.
	negative regulation of cell communication (GO:0010648)	15/78	0.0354323	0.203995	0	0	1.80117	6.01615	RET;ACVR1;CSF1R;PTPN1;MPIG6B;FLT3;FLT4;INSR;OSM;LMTK2;MERTK;NLRP12;IL1B;ROR2;RAF1	.
	regulation of JAK-STAT cascade (GO:0046425)	13/65	0.0362569	0.208151	0	0	1.89079	6.27198	NOTCH1;CISH;BGN;GP1BA;ADIPOR1;NYX;IL22RA2;SOCS3;IL23A;HGS;BCL3;IL12B;SOCS6	.
	fatty acid catabolic process (GO:0009062)	13/65	0.0362569	0.208151	0	0	1.89079	6.27198	ACADVL;PHYH;ACAA2;PLA2G15;NUDT7;SLC25A17;AUH;HACL1;ADTRP;ACAA1;LPIN2;LPIN3;PPARD	.
	regulation of vascular endothelial growth factor receptor signaling pathway (GO:0030947)	44369	0.0364915	0.208151	0	0	2.83346	9.38066	PTPN1;HGS;ITGB3;IL1B;GRB10;EPN2	.
	early endosome to late endosome transport (GO:0045022)	44369	0.0364915	0.208151	0	0	2.83346	9.38066	BECN1;FAM160A2;AKTIP;LMTK2;RILP;RAB7A	.
	regulation of cytokine production involved in inflammatory response (GO:1900015)	44369	0.0364915	0.208151	0	0	2.83346	9.38066	NOD2;MEFV;F2;MAPK14;TLR4;MYD88	.
	purine-containing compound biosynthetic process (GO:0072522)	44369	0.0364915	0.208151	0	0	2.83346	9.38066	PNP;GMPR;AMPD2;AMPD3;HPRT1;DCK	.
	regulation of membrane protein ectodomain proteolysis (GO:0051043)	44369	0.0364915	0.208151	0	0	2.83346	9.38066	IL10;IL1B;TIMP2;FURIN;SNX33;TNFRSF1B	.
	regulation of neuron death (GO:1901214)	14/72	0.0379111	0.212063	0	0	1.82575	5.97478	EGLN3;EGLN2;CTSZ;GBA;CLU;TANK;BTBD10;SORL1;CHORDC1;DDIT4;ZNF746;CHMP4B;FCGR2B;PICALM	.
	positive regulation of cellular catabolic process (GO:0031331)	19/106	0.0381521	0.212063	0	0	1.6527	5.398	PTPN1;PFKFB4;HSP90AA1;PFKFB3;INSR;PLK2;BNIP3;PRKCD;FURIN;PRR5L;ABHD5;SNX33;MEFV;TNFRSF1B;TMEM59;STK11;IL1B;OPTN;PNPLA2	.
	lytic vacuole organization (GO:0080171)	44405	0.0385983	0.212063	0	0	2.51899	8.19818	FAM160A2;AKTIP;GAA;HPS1;LAMTOR1;ARSB;TPCN2	.
	regulation of actin polymerization or depolymerization (GO:0008064)	44405	0.0385983	0.212063	0	0	2.51899	8.19818	FCHSD1;WDR1;WAS;BRK1;HCLS1;ARHGAP28;SSH3	.
	carboxylic acid catabolic process (GO:0046395)	44405	0.0385983	0.212063	0	0	2.51899	8.19818	CEMIP;NAGK;HYAL1;AMDHD2;CHORDC1;RENBP;CD44	.
	regulation of cyclic-nucleotide phosphodiesterase activity (GO:0051342)	44262	0.0389831	0.212063	0	0	5.66349	18.3759	MAPK7;GNAT1;CALM2	.
	response to misfolded protein (GO:0051788)	44262	0.0389831	0.212063	0	0	5.66349	18.3759	UBE2W;DNAJB12;CLU	.
	hemostasis (GO:0007599)	44262	0.0389831	0.212063	0	0	5.66349	18.3759	NFE2;GPI;VWF	.
	sulfur amino acid biosynthetic process (GO:0000097)	44262	0.0389831	0.212063	0	0	5.66349	18.3759	CTH;GGT1;CDO1	.
	valine metabolic process (GO:0006573)	44262	0.0389831	0.212063	0	0	5.66349	18.3759	STAT5A;STAT5B;HIBADH	.
	AMP metabolic process (GO:0046033)	44262	0.0389831	0.212063	0	0	5.66349	18.3759	AK3;AK4;AMPD3	.
	regulation of T-helper 1 cell differentiation (GO:0045625)	44262	0.0389831	0.212063	0	0	5.66349	18.3759	ANXA1;IL27;JAK3	.
	activation of MAPKKK activity (GO:0000185)	44262	0.0389831	0.212063	0	0	5.66349	18.3759	GADD45B;GADD45A;GADD45G	.
	regulation of interleukin-18 production (GO:0032661)	44262	0.0389831	0.212063	0	0	5.66349	18.3759	IL10;NLRP12;TLR2	.
	regulation of smooth muscle cell differentiation (GO:0051150)	44262	0.0389831	0.212063	0	0	5.66349	18.3759	RBPMS2;FOXO4;EREG	.
	adenine nucleotide transport (GO:0051503)	44262	0.0389831	0.212063	0	0	5.66349	18.3759	SLC25A16;SLC25A17;SLC25A24	.
	granulocyte migration (GO:0097530)	44262	0.0389831	0.212063	0	0	5.66349	18.3759	ANXA1;ITGB2;IRAK4	.
	regulation of pinocytosis (GO:0048548)	44262	0.0389831	0.212063	0	0	5.66349	18.3759	PPT1;NR1H3;ANKFY1	.
	negative regulation of alpha-beta T cell activation (GO:0046636)	44262	0.0389831	0.212063	0	0	5.66349	18.3759	CD300A;HFE;TARM1	.
	purine ribonucleotide transport (GO:0015868)	44262	0.0389831	0.212063	0	0	5.66349	18.3759	SLC25A16;SLC25A17;SLC25A24	.
	hyaluronan biosynthetic process (GO:0030213)	44262	0.0389831	0.212063	0	0	5.66349	18.3759	CEMIP;HYAL1;IL1B	.
	pentose metabolic process (GO:0019321)	44262	0.0389831	0.212063	0	0	5.66349	18.3759	G6PD;FGGY;XYLB	.
	xenobiotic catabolic process (GO:0042178)	44262	0.0389831	0.212063	0	0	5.66349	18.3759	GSTM3;ACAA1;CRYZ	.
	regulation of activation of Janus kinase activity (GO:0010533)	44262	0.0389831	0.212063	0	0	5.66349	18.3759	IL23A;CD300A;IL12B	.
	negative regulation of glycoprotein biosynthetic process (GO:0010561)	44262	0.0389831	0.212063	0	0	5.66349	18.3759	ABCA7;JAK3;ITM2B	.
	cleavage furrow formation (GO:0036089)	44262	0.0389831	0.212063	0	0	5.66349	18.3759	SNX18;SNX33;RHOA	.
	negative regulation of cyclin-dependent protein serine/threonine kinase activity involved in G1/S transition of mitotic cell cycle (GO:0031658)	44262	0.0389831	0.212063	0	0	5.66349	18.3759	CDKN2D;CDKN2B;CDK6	.
	positive regulation of neurological system process (GO:0031646)	44262	0.0389831	0.212063	0	0	5.66349	18.3759	RNF10;MYRF;PARD3	.
	regulation of cyclic nucleotide metabolic process (GO:0030799)	44262	0.0389831	0.212063	0	0	5.66349	18.3759	PKD2;THBS1;CALM2	.
	substrate-dependent cell migration, cell extension (GO:0006930)	44262	0.0389831	0.212063	0	0	5.66349	18.3759	SHTN1;SDCBP;OPHN1	.
	negative regulation of mitochondrial outer membrane permeabilization involved in apoptotic signaling pathway (GO:1901029)	44262	0.0389831	0.212063	0	0	5.66349	18.3759	SLC35F6;ACAA2;MPV17L	.
	negative regulation of MyD88-independent toll-like receptor signaling pathway (GO:0034128)	44262	0.0389831	0.212063	0	0	5.66349	18.3759	LY96;CD14;TLR4	.
	regulation of endocytic recycling (GO:2001135)	44262	0.0389831	0.212063	0	0	5.66349	18.3759	EHD1;EHD2;SORL1	.
	positive regulation of mast cell degranulation (GO:0043306)	44262	0.0389831	0.212063	0	0	5.66349	18.3759	FGR;VAMP8;GAB2	.
	regulation of tube diameter (GO:0035296)	44262	0.0389831	0.212063	0	0	5.66349	18.3759	ACE2;ACE;ADCY6	.
	posttranslational protein targeting to endoplasmic reticulum membrane (GO:0006620)	44262	0.0389831	0.212063	0	0	5.66349	18.3759	CHMP4B;HYOU1;SEC62	.
	response to glucagon (GO:0033762)	12632	0.0390436	0.212063	0	0	2.32556	7.54198	GNG10;GNG2;GNG5;GNG4;GNG7;GNB2;GNG11;ADCY6	.
	macromolecule catabolic process (GO:0009057)	12632	0.0390436	0.212063	0	0	2.32556	7.54198	BECN1;SMURF1;SIAH1;PPT1;CLN8;CTSD;PGA5;LGMN	.
	positive regulation of cholesterol transport (GO:0032376)	44333	0.0405538	0.21592	0	0	3.14765	10.0886	NFKBIA;LRP1;SCP2;NR1H3;ABCA7	.
	regulation of tissue remodeling (GO:0034103)	44333	0.0405538	0.21592	0	0	3.14765	10.0886	CST3;IL23A;FLT4;IL18;IL12B	.
	negative regulation of B cell activation (GO:0050869)	44333	0.0405538	0.21592	0	0	3.14765	10.0886	LYN;IL10;CD300A;FCGR2B;SAMSN1	.
	regulation of mitochondrial outer membrane permeabilization involved in apoptotic signaling pathway (GO:1901028)	44333	0.0405538	0.21592	0	0	3.14765	10.0886	SLC35F6;GSK3A;ACAA2;MPV17L;HIP1R	.
	positive regulation of dendrite extension (GO:1903861)	44333	0.0405538	0.21592	0	0	3.14765	10.0886	CPNE9;SYT4;UNC13A;CPNE5;SMURF1	.
	negative regulation of stress fiber assembly (GO:0051497)	44333	0.0405538	0.21592	0	0	3.14765	10.0886	DLC1;WAS;ARHGAP28;ARAP1;WASF2	.
	3'-UTR-mediated mRNA stabilization (GO:0070935)	44333	0.0405538	0.21592	0	0	3.14765	10.0886	ZFP36;MAPKAPK2;MAPK14;TIRAP;MYD88	.
	regulation of receptor recycling (GO:0001919)	44333	0.0405538	0.21592	0	0	3.14765	10.0886	RAMP3;ANXA2;ECE1;LAMTOR1;OPTN	.
	phospholipid catabolic process (GO:0009395)	44333	0.0405538	0.21592	0	0	3.14765	10.0886	ABHD12;SMPD1;ENPP2;PNPLA6;GPCPD1	.
	positive regulation of natural killer cell mediated cytotoxicity (GO:0045954)	44333	0.0405538	0.21592	0	0	3.14765	10.0886	CADM1;LAMP1;IL12B;SLAMF6;NECTIN2	.
	macrophage activation (GO:0042116)	44333	0.0405538	0.21592	0	0	3.14765	10.0886	SBNO2;SLC11A1;LBP;CLU;TLR4	.
	heterocycle biosynthetic process (GO:0018130)	44333	0.0405538	0.21592	0	0	3.14765	10.0886	MOCS2;GCH1;MOCOS;MOCS1;GPHN	.
	defense response to fungus (GO:0050832)	44333	0.0405538	0.21592	0	0	3.14765	10.0886	S100A12;S100A9;GAPDH;S100A8;LTF	.
	negative regulation of axon guidance (GO:1902668)	44333	0.0405538	0.21592	0	0	3.14765	10.0886	SEMA4A;SEMA7A;SEMA4D;SEMA3C;PTPRO	.
	2-oxoglutarate metabolic process (GO:0006103)	44333	0.0405538	0.21592	0	0	3.14765	10.0886	STAT5A;STAT5B;PHYH;IDH1;GPT2	.
	preassembly of GPI anchor in ER membrane (GO:0016254)	44333	0.0405538	0.21592	0	0	3.14765	10.0886	DPM2;PIGB;PIGN;PIGF;PIGH	.
	cellular response to starvation (GO:0009267)	19/107	0.041489	0.220627	0	0	1.63382	5.19936	GABARAPL2;BECN1;GABARAPL1;CDKN1A;MTMR3;RALB;ZFYVE1;GABARAP;MAP1LC3B;MAP1LC3A;STK24;LAMP2;SESN2;PDK4;MAPK1;FAS;GAS2L1;ATG7;CPEB4	.
	negative regulation of cell migration (GO:0030336)	21/121	0.0415408	0.220631	0	0	1.58939	5.05598	ACVRL1;IFITM1;PTPRR;LRP1;CITED2;SERPINE1;TPM1;ARAP3;FUZ;ADARB1;THY1;ADIPOR1;PTPRG;DACH1;STK24;DLC1;PLXNB3;HMOX1;TRIB1;SRGAP2;SRGAP1	.
	regulation of protein complex assembly (GO:0043254)	14/73	0.0420436	0.221419	0	0	1.7947	5.6875	HSP90AA1;RALB;GSN;SRC;SPIDR;PRKCZ;SELP;HCK;PINK1;NCLN;VPS41;ULK1;STXBP6;RAF1	.
	negative regulation of JAK-STAT cascade (GO:0046426)	17441	0.042638	0.221419	0	0	2.0432	6.44632	SOCS3;CISH;HGS;BCL3;BGN;GP1BA;ADIPOR1;SOCS6;NYX;PTPN2	.
	regulation of nitric-oxide synthase biosynthetic process (GO:0051769)	44298	0.0428172	0.221419	0	0	3.77642	11.8988	NOD2;JAK2;TLR4;TLR2	.
	regulation of cytokine biosynthetic process (GO:0042035)	44298	0.0428172	0.221419	0	0	3.77642	11.8988	NLRP12;IL12B;IGF2BP2;EREG	.
	UDP-N-acetylglucosamine metabolic process (GO:0006047)	44298	0.0428172	0.221419	0	0	3.77642	11.8988	NAGK;AMDHD2;UAP1;RENBP	.
	positive regulation of T-helper 1 type immune response (GO:0002827)	44298	0.0428172	0.221419	0	0	3.77642	11.8988	ANXA1;IL23A;SLC11A1;IL12B	.
	nonribosomal peptide biosynthetic process (GO:0019184)	44298	0.0428172	0.221419	0	0	3.77642	11.8988	GSS;MGST2;GGT1;CNDP2	.
	positive regulation of amyloid precursor protein catabolic process (GO:1902993)	44298	0.0428172	0.221419	0	0	3.77642	11.8988	LYN;GSK3A;CLU;PICALM	.
	regulation of bone remodeling (GO:0046850)	44298	0.0428172	0.221419	0	0	3.77642	11.8988	CSF1R;SRC;BGLAP;ITGB3	.
	nitric oxide metabolic process (GO:0046209)	44298	0.0428172	0.221419	0	0	3.77642	11.8988	GCHFR;ARG2;GCH1;DDAH2	.
	regulation of mononuclear cell migration (GO:0071675)	44298	0.0428172	0.221419	0	0	3.77642	11.8988	LYN;LGALS3;THBS1;CMKLR1	.
	positive regulation of peptidase activity (GO:0010952)	44298	0.0428172	0.221419	0	0	3.77642	11.8988	PRELID1;PINK1;CTSH;TANK	.
	regulation of sequestering of triglyceride (GO:0010889)	44298	0.0428172	0.221419	0	0	3.77642	11.8988	LPL;PPARG;ABHD5;PNPLA2	.
	regulation of angiotensin levels in blood (GO:0002002)	44298	0.0428172	0.221419	0	0	3.77642	11.8988	ACE2;ACE;CTSZ;ECE1	.
	cellular response to fatty acid (GO:0071398)	44298	0.0428172	0.221419	0	0	3.77642	11.8988	DGAT2;PDK4;PDK3;FFAR2	.
	negative regulation of fibroblast growth factor receptor signaling pathway (GO:0040037)	44298	0.0428172	0.221419	0	0	3.77642	11.8988	GPC1;FUZ;SPRY1;THBS1	.
	dermatan sulfate biosynthetic process (GO:0030208)	44298	0.0428172	0.221419	0	0	3.77642	11.8988	VCAN;UST;DSE;BGN	.
	positive regulation of granulocyte macrophage colony-stimulating factor production (GO:0032725)	44298	0.0428172	0.221419	0	0	3.77642	11.8988	IL23A;IL1B;IL18;IL12B	.
	cellular modified amino acid catabolic process (GO:0042219)	44298	0.0428172	0.221419	0	0	3.77642	11.8988	GGT5;HOGA1;GGT1;PRODH	.
	amino sugar biosynthetic process (GO:0046349)	44298	0.0428172	0.221419	0	0	3.77642	11.8988	NAGK;AMDHD2;UAP1;RENBP	.
	entry of bacterium into host cell (GO:0035635)	44298	0.0428172	0.221419	0	0	3.77642	11.8988	SRC;CTNND1;UBC;GRB2	.
	regulation of actomyosin structure organization (GO:0110020)	44298	0.0428172	0.221419	0	0	3.77642	11.8988	PTGER4;FHOD1;WAS;RAC1	.
	membrane lipid biosynthetic process (GO:0046467)	22251	0.0431412	0.222827	0	0	1.8904	5.94206	CERS6;SGMS1;SPHK2;SPHK1;ALDH3B1;ACER3;ST3GAL4;SPTSSA;HACD2;ABO;SGPP1;CERS2	.
	ERBB signaling pathway (GO:0038127)	15/80	0.0431982	0.222855	0	0	1.74555	5.48445	PTPRR;HSP90AA1;DGKD;SRC;MVP;PXN;TGFA;NRG1;AREG;EREG;FES;UBC;PTK2B;MAPK1;GRB2	.
	regulation of programmed cell death (GO:0043067)	41/268	0.0441344	0.227301	0	0	1.36892	4.27173	RARG;STEAP3;HIP1;FLT3;NLRC4;TANK;CLU;NDRG1;STK3;PAK1;UBC;CASP1;HS1BP3;RIPK1;JAK2;JAK3;RELT;CTSB;MAP3K3;MAP2K4;BNIP3L;PRELID1;MAP2K2;DUSP1;ACTN1;BNIP3;ACTN4;TNFRSF1B;CIDEC;TNFRSF1A;PINK1;PAX8;STK24;BCL6;BCL3;FAS;TMEM219;LTBR;SGK1;RAF1;TPT1	.
	cellular response to peptide (GO:1901653)	15220	0.0443817	0.227301	0	0	2.1259	6.62202	LRP1;SRC;CASP4;NOD1;NOD2;PSEN1;CD36;FCGR2B;TLR4	.
	negative regulation of STAT cascade (GO:1904893)	15220	0.0443817	0.227301	0	0	2.1259	6.62202	SOCS3;CISH;HGS;BCL3;BGN;GP1BA;ADIPOR1;SOCS6;NYX	.
	negative regulation of proteolysis (GO:0045861)	15220	0.0443817	0.227301	0	0	2.1259	6.62202	CST3;IL10;CSTB;SERPINB4;TMEM59;ECM1;TIMP2;CLN8;F2	.
	positive regulation of ERBB signaling pathway (GO:1901186)	44370	0.044639	0.227301	0	0	2.66663	8.29096	HIP1;UBC;PLAUR;HIP1R;ARAP1;MMP9	.
	vesicle-mediated transport between endosomal compartments (GO:0098927)	44370	0.044639	0.227301	0	0	2.66663	8.29096	BECN1;FAM160A2;AKTIP;LMTK2;RILP;RAB7A	.
	negative regulation of signal transduction in absence of ligand (GO:1901099)	44370	0.044639	0.227301	0	0	2.66663	8.29096	MAPK7;EYA3;IL1B;GATA1;BCL2L1;MCL1	.
	negative regulation of extrinsic apoptotic signaling pathway in absence of ligand (GO:2001240)	44370	0.044639	0.227301	0	0	2.66663	8.29096	MAPK7;EYA3;IL1B;GATA1;BCL2L1;MCL1	.
	cellular response to interleukin-6 (GO:0071354)	44370	0.044639	0.227301	0	0	2.66663	8.29096	SOCS3;SBNO2;SELPLG;STAT3;JAK2;IL6R	.
	cellular response to amyloid-beta (GO:1904646)	44370	0.044639	0.227301	0	0	2.66663	8.29096	LRP1;CASP4;PSEN1;CD36;FCGR2B;TLR4	.
	viral budding (GO:0046755)	44370	0.044639	0.227301	0	0	2.66663	8.29096	VPS37C;CHMP2A;CHMP3;CHMP4B;VPS37B;CHMP5	.
	negative regulation of hydrolase activity (GO:0051346)	19/108	0.0450324	0.228765	0	0	1.61537	5.00826	TSKS;PPP1R26;SERPINB4;CSTB;ECM1;CSRNP3;ELL;FKBP15;F11R;GMIP;ZFYVE1;GCHFR;CST3;SPRED1;MAPK7;CHORDC1;PLXNB3;GNAT1;LTF	.
	monocarboxylic acid metabolic process (GO:0032787)	19/108	0.0450324	0.228765	0	0	1.61537	5.00826	SCARB2;GGT5;STAT5A;STAT5B;ACOT7;HOGA1;SLC5A6;LDHB;SCPEP1;LDHA;VNN1;PC;VNN2;NPC1;PDZD11;BCO2;GGT1;ACAA1;SLC16A3	.
	regulation of microtubule polymerization (GO:0031113)	12997	0.0456063	0.230549	0	0	2.2393	6.91432	PAK1;PSRC1;NUMA1;MAP2;FES;RAC1;EML2;CDK5R1	.
	regulation of mitotic spindle organization (GO:0060236)	12997	0.0456063	0.230549	0	0	2.2393	6.91432	PARP3;PSRC1;NUMA1;PLK1;CHMP2A;TACC3;CHMP4B;CHMP5	.
	erythrocyte differentiation (GO:0030218)	12997	0.0456063	0.230549	0	0	2.2393	6.91432	LYN;MPIG6B;CASP3;HCLS1;JAK2;GATA1;JAK3;PTPN2	.
	cellular response to nutrient levels (GO:0031669)	20029	0.0458134	0.230549	0	0	1.93409	5.96313	MAP1LC3B;CDKN2B;MAP1LC3A;RALB;STK24;LAMP2;PDK4;ULK1;GAS2L1;ZFYVE1;ATG7	.
	superoxide metabolic process (GO:0006801)	44406	0.0459177	0.230549	0	0	2.40436	7.4076	PREX1;NCF1;NCF2;SH3PXD2B;ALOX12;CYBA;SOD2	.
	vacuolar transport (GO:0007034)	44406	0.0459177	0.230549	0	0	2.40436	7.4076	BECN1;NPC1;TMEM50A;VPS41;ATP6V0D1;ARSB;VTI1B	.
	cortical cytoskeleton organization (GO:0030865)	44406	0.0459177	0.230549	0	0	2.40436	7.4076	IKBKB;FMNL1;PPP2R3C;PLEK;EPB41L3;RAB13;RHOQ	.
	coenzyme biosynthetic process (GO:0009108)	44406	0.0459177	0.230549	0	0	2.40436	7.4076	SLC25A16;MOCS2;PDXK;ACOT7;GCH1;MOCS1;GPHN	.
	carbohydrate derivative biosynthetic process (GO:1901137)	44406	0.0459177	0.230549	0	0	2.40436	7.4076	GK5;G6PD;GK;TNIP1;ST3GAL4;LARGE1;ABO	.
	regulation of macrophage derived foam cell differentiation (GO:0010743)	44406	0.0459177	0.230549	0	0	2.40436	7.4076	NFKBIA;ITGB3;IL18;LPL;NR1H3;PPARG;CD36	.
	transmembrane receptor protein serine/threonine kinase signaling pathway (GO:0007178)	24/144	0.0469453	0.235435	0	0	1.51394	4.6308	ACVR1;ACVRL1;SMAD1;DDX5;JUN;ZFYVE9;SMURF1;SRC;HFE;UBE2D3;PXN;UBE2D1;FURIN;F11R;ACVR1B;PRKCZ;FSTL1;ACVR2B;RHOA;IRAK1;PARD3;UBC;ID1;ZYX	.
	positive regulation of binding (GO:0051099)	15/81	0.0475026	0.237954	0	0	1.71901	5.23776	TCF7L2;RALB;LRP1;HFE;AKTIP;HMGB2;PLAUR;HIP1R;PSEN1;SPPL3;MMP9;STK3;FLOT1;RARA;PPARG	.
	protein localization to plasma membrane (GO:0072659)	22/130	0.0479661	0.239997	0	0	1.5417	4.68255	RAMP2;SYS1;RAMP3;PPIL2;SMURF1;TESC;ATP1B3;F11R;RAB11A;TNFRSF1A;GOLGA7B;IKBKB;EHD2;RAB31;RILPL2;TMEM88;EPB41L3;RAB13;FLOT1;FLOT2;GOLGA7;OPTN	.
	regulation of vesicle fusion (GO:0031338)	22616	0.0482088	0.240932	0	0	1.85172	5.61481	TBC1D2;ANXA1;TBC1D9B;ANXA2;VPS41;TBC1D8;TBC1D9;TBC1D14;STXBP6;TBC1D12;TBC1D22A;TBC1D10B	.
	endosome to lysosome transport (GO:0008333)	17807	0.0484259	0.241738	0	0	1.98932	6.0231	FAM160A2;SORT1;AKTIP;VPS41;DENND3;RAB7B;RILP;UBXN6;VPS39;RAB7A	.
	regulation of cytoskeleton organization (GO:0051493)	17/95	0.0486007	0.24233	0	0	1.64878	4.98609	LRP1;PRKCD;TWF2;HIP1R;ARHGAP28;BAIAP2;CORO1A;RHOA;BST1;DLC1;CAPN2;MAPK1;S100A9;RHOQ;ARHGEF5;S100A8;MARK2	.
	response to interferon-gamma (GO:0034341)	13/68	0.0499779	0.248623	0	0	1.78735	5.35521	IFITM3;CCL14;IFITM1;GCH1;SLC11A1;ACOD1;MEFV;CXCL16;CASP1;LGALS9;GAPDH;CCL16;SLC26A6	.
	COPII-coated vesicle budding (GO:0090114)	13/68	0.0499779	0.248623	0	0	1.78735	5.35521	GRIA1;RAB1A;MCFD2;PEF1;RAB1B;CTSZ;TGFA;AREG;TFG;STX5;CD59;CTSC;BET1	.
	negative regulation of protein secretion (GO:0050709)	15585	0.0508455	0.250084	0	0	2.06136	6.14072	PTGER4;SRGN;MIDN;NLRP12;PPP1R11;IL1B;NR1H3;FCGR2B;RAB11FIP5	.
	regulation of viral process (GO:0050792)	44334	0.0509088	0.250084	0	0	2.90536	8.65135	CHMP2A;CHMP3;CHMP4B;LTF;RAB7A	.
	regulation of amyloid-beta formation (GO:1902003)	44334	0.0509088	0.250084	0	0	2.90536	8.65135	GSK3A;ABCA7;CLU;SORL1;PICALM	.
	retrograde protein transport, ER to cytosol (GO:0030970)	44334	0.0509088	0.250084	0	0	2.90536	8.65135	OS9;HM13;TMEM129;DERL2;HERPUD1	.
	regulation of cholesterol efflux (GO:0010874)	44334	0.0509088	0.250084	0	0	2.90536	8.65135	NFKBIA;LRP1;NR1H3;ABCA7;LAMTOR1	.
	negative regulation of peptidyl-serine phosphorylation (GO:0033137)	44334	0.0509088	0.250084	0	0	2.90536	8.65135	PAQR3;CNKSR3;DDIT4;DMD;PPM1F	.
	acute-phase response (GO:0006953)	44334	0.0509088	0.250084	0	0	2.90536	8.65135	IL1RN;CEBPB;IL1B;LBP;IL6R	.
	regulation of dendrite extension (GO:1903859)	44334	0.0509088	0.250084	0	0	2.90536	8.65135	CPNE9;SYT4;UNC13A;CPNE5;SMURF1	.
	negative regulation of calcium-mediated signaling (GO:0050849)	44334	0.0509088	0.250084	0	0	2.90536	8.65135	PLEK;CHORDC1;SRI;PKD2;CALM2	.
	membrane lipid metabolic process (GO:0006643)	44334	0.0509088	0.250084	0	0	2.90536	8.65135	MGST2;TEX2;SMPDL3B;ST6GALNAC4;B4GALT4	.
	release of cytochrome c from mitochondria (GO:0001836)	44334	0.0509088	0.250084	0	0	2.90536	8.65135	SFN;SOD2;CLU;BBC3;BCL2L1	.
	regulation of axonogenesis (GO:0050770)	20394	0.0514498	0.252168	0	0	1.89002	5.60798	PAK1;GDI1;OMG;PLXNA2;PLXNB3;PLXNB2;THY1;SSH3;RHOA;MARK2;DNM2	.
	fat cell differentiation (GO:0045444)	20394	0.0514498	0.252168	0	0	1.89002	5.60798	TCF7L2;STEAP4;CTBP2;TMEM120A;BBS9;FFAR2;PPARG;METRNL;SENP2;ATF5;KLF4	.
	protein localization to membrane (GO:0072657)	26/160	0.0519952	0.254195	0	0	1.46884	4.34279	RAMP2;RAMP3;ITGB2;THY1;F11R;GOLGA7B;IKBKB;TMEM88;PDZD11;EPB41L3;SH3PXD2B;FLOT1;CAPN3;FLOT2;ITGB7;PPIL2;SMURF1;TESC;ATP1B3;RAB11A;TNFRSF1A;RAB32;EHD2;NPC1;HGS;RAB13	.
	negative regulation of NF-kappaB transcription factor activity (GO:0032088)	15/82	0.0520987	0.254195	0	0	1.69325	5.00291	NLRX1;ANXA4;NLRC5;ACOD1;NOD1;NOD2;KLF4;PYCARD;NFKBIA;NLRP12;IRAK1;IRAK2;CHORDC1;RBCK1;CMKLR1	.
	retrograde transport, endosome to Golgi (GO:0042147)	15/82	0.0520987	0.254195	0	0	1.69325	5.00291	TMEM87A;DENND2A;ZFYVE21;VPS26A;STX6;ANKFY1;TBC1D14;STX5;DENND5A;TBC1D23;RAB7B;WASHC1;TBC1D10B;RAB7A;VTI1B	.
	negative regulation of binding (GO:0051100)	15/82	0.0520987	0.254195	0	0	1.69325	5.00291	LRPAP1;JUN;RALB;CTSZ;PRKCD;ARHGAP28;CSNK1E;SORL1;ACTB;NFKBIA;ID1;TMBIM6;MITD1;JAK2;DISC1	.
	ion transmembrane transport (GO:0034220)	34/219	0.0523066	0.254921	0	0	1.39204	4.1074	RYR1;GABRB1;TTYH3;TCIRG1;ATP2C2;CLCN2;PDZD11;CHRNE;UBC;ANO10;ATP6V1E1;SLC13A5;ATP6V1D;ATP6V1C1;ATP6V0A1;ATP6V1F;TIMM8B;ATP6V0B;SLC13A3;ATP6V0E1;ATP6AP1;TSC22D3;ATP1B3;TPCN2;CLCN7;P2RX4;FXYD4;OSTM1;ASPH;P2RX1;ATP6V1B2;ATP6V0D1;SGK1;RAF1	.
	organophosphate biosynthetic process (GO:0090407)	13363	0.0528512	0.256061	0	0	2.15921	6.34866	GK5;MOCS2;PDXK;G6PD;GK;MOCOS;MOCS1;GPHN	.
	regulation of nitric-oxide synthase activity (GO:0050999)	13363	0.0528512	0.256061	0	0	2.15921	6.34866	SCARB1;HSP90AA1;GCH1;S100A1;DDAH2;IL1B;ZDHHC21;DNM2	.
	positive regulation of purine nucleotide biosynthetic process (GO:1900373)	44371	0.0538328	0.256061	0	0	2.51834	7.35828	RAMP2;PINK1;RAMP3;SCT;ENO1;CALM2	.
	positive regulation of microtubule polymerization or depolymerization (GO:0031112)	44371	0.0538328	0.256061	0	0	2.51834	7.35828	PAK1;PSRC1;NUMA1;FES;RAC1;CDK5R1	.
	negative regulation of oxidative stress-induced cell death (GO:1903202)	44371	0.0538328	0.256061	0	0	2.51834	7.35828	PINK1;VNN1;MAPK7;SOD2;NOL3;NFE2L2	.
	actin nucleation (GO:0045010)	44371	0.0538328	0.256061	0	0	2.51834	7.35828	ACTR3;ARPC3;ARPC1B;ARPC4;ARPC5;WASHC1	.
	cytoplasmic pattern recognition receptor signaling pathway (GO:0002753)	44371	0.0538328	0.256061	0	0	2.51834	7.35828	IKBKB;IRAK1;IRAK2;UBC;NOD1;NOD2	.
	positive regulation of microtubule polymerization (GO:0031116)	44371	0.0538328	0.256061	0	0	2.51834	7.35828	PAK1;PSRC1;NUMA1;FES;RAC1;CDK5R1	.
	response to glucocorticoid (GO:0051384)	44371	0.0538328	0.256061	0	0	2.51834	7.35828	IL10;IL1RN;ZFP36;ANXA1;SLIT3;UBE2L3	.
	regulation of actin cytoskeleton reorganization (GO:2000249)	44407	0.0540678	0.256061	0	0	2.29969	6.70938	CSF1R;HCK;FES;PTK2B;HCLS1;F11R;BAIAP2	.
	regulation of leukocyte chemotaxis (GO:0002688)	44407	0.0540678	0.256061	0	0	2.29969	6.70938	LYN;CXCL8;PTK2B;PPBP;IL6R;SLC8B1;CXCL5	.
	regulation of ARF protein signal transduction (GO:0032012)	44407	0.0540678	0.256061	0	0	2.29969	6.70938	GIT2;ADAP2;APLP2;ARAP3;ARAP1;ADAP1;SMAP2	.
	chondroitin sulfate metabolic process (GO:0030204)	44407	0.0540678	0.256061	0	0	2.29969	6.70938	VCAN;CHSY1;HYAL1;CHPF2;CHST15;BGN;ARSB	.
	antimicrobial humoral immune response mediated by antimicrobial peptide (GO:0061844)	18172	0.0547172	0.256061	0	0	1.9382	5.63159	PGLYRP4;S100A12;DEFB1;ROMO1;PGLYRP1;F2;DEFB4A;S100A9;GAPDH;LTF	.
	regulation of megakaryocyte differentiation (GO:0045652)	18172	0.0547172	0.256061	0	0	1.9382	5.63159	KAT2B;NFE2;TESC;ITGA2B;HMGB2;GP1BA;RAB7B;MYL9;THBS1;GATA1	.
	regulation of release of sequestered calcium ion into cytosol (GO:0051279)	18172	0.0547172	0.256061	0	0	1.9382	5.63159	SELENON;CEMIP;CAPN3;PTK2B;DMD;THY1;SRI;F2;CALM2;F2RL3	.
	negative regulation of angiogenesis (GO:0016525)	13/69	0.0552513	0.256061	0	0	1.75533	5.0832	SERPINE1;FOXO4;THBS2;KLF4;SYNJ2BP;THBS1;EPN2;SPRED1;HGS;STAB1;PGK1;E2F2;PPARG	.
	dermatan sulfate metabolic process (GO:0030205)	44299	0.0562767	0.256061	0	0	3.35663	9.65862	VCAN;UST;DSE;BGN	.
	regulation of granulocyte chemotaxis (GO:0071622)	44299	0.0562767	0.256061	0	0	3.35663	9.65862	BST1;THBS1;CMKLR1;JAM3	.
	positive regulation of T cell mediated cytotoxicity (GO:0001916)	44299	0.0562767	0.256061	0	0	3.35663	9.65862	IL23A;IL12B;FADD;NECTIN2	.
	positive regulation of cholesterol efflux (GO:0010875)	44299	0.0562767	0.256061	0	0	3.35663	9.65862	NFKBIA;LRP1;NR1H3;ABCA7	.
	glutamine family amino acid biosynthetic process (GO:0009084)	44299	0.0562767	0.256061	0	0	3.35663	9.65862	ACOD1;NAGS;GLUL;ASS1	.
	response to UV-B (GO:0010224)	44299	0.0562767	0.256061	0	0	3.35663	9.65862	CDKN1A;STK11;HYAL1;IL12B	.
	positive regulation of ERAD pathway (GO:1904294)	44299	0.0562767	0.256061	0	0	3.35663	9.65862	TMEM259;EDEM2;HERPUD1;NFE2L2	.
	regulation of fibrinolysis (GO:0051917)	44299	0.0562767	0.256061	0	0	3.35663	9.65862	SERPINE1;F2;THBS1;USF1	.
	chondroitin sulfate catabolic process (GO:0030207)	44299	0.0562767	0.256061	0	0	3.35663	9.65862	VCAN;HYAL1;BGN;ARSB	.
	glomerular visceral epithelial cell differentiation (GO:0072112)	44299	0.0562767	0.256061	0	0	3.35663	9.65862	BASP1;PTPRO;CD24;KLF15	.
	negative regulation of chemokine production (GO:0032682)	44299	0.0562767	0.256061	0	0	3.35663	9.65862	IL10;LGALS9;MEFV;KLF4	.
	response to fatty acid (GO:0070542)	44299	0.0562767	0.256061	0	0	3.35663	9.65862	PDK4;PDK3;FFAR2;CD36	.
	negative regulation of interleukin-10 production (GO:0032693)	44299	0.0562767	0.256061	0	0	3.35663	9.65862	IL23A;IL12B;FCGR2B;JAK3	.
	negative regulation of macrophage derived foam cell differentiation (GO:0010745)	44299	0.0562767	0.256061	0	0	3.35663	9.65862	NFKBIA;ITGB3;NR1H3;PPARG	.
	glucosamine-containing compound metabolic process (GO:1901071)	44299	0.0562767	0.256061	0	0	3.35663	9.65862	NAGK;MGAT3;LARGE1;RENBP	.
	regulation of DNA-templated transcription in response to stress (GO:0043620)	44299	0.0562767	0.256061	0	0	3.35663	9.65862	RGS14;DDIT3;RPS6KA1;HSF4	.
	endoplasmic reticulum tubular network organization (GO:0071786)	44299	0.0562767	0.256061	0	0	3.35663	9.65862	RTN3;TMEM33;REEP2;RAB18	.
	regulation of granulocyte macrophage colony-stimulating factor production (GO:0032645)	44299	0.0562767	0.256061	0	0	3.35663	9.65862	IL23A;IL1B;IL18;IL12B	.
	plasma membrane bounded cell projection organization (GO:0120036)	20/118	0.0565028	0.256061	0	0	1.54411	4.43694	LYN;CSF1R;CARMIL1;TPM1;PLEK;FRY;CFAP126;RAB11A;EHD1;DBNDD1;CATIP;OPHN1;RAB25;MAP2;RAB13;ULK1;TBC1D23;RAC1;STX3;CDK5R1	.
	lipoprotein transport (GO:0042953)	44263	0.0570473	0.256061	0	0	4.53054	12.9749	LRP1;PPARG;CD36	.
	regulation of fibroblast apoptotic process (GO:2000269)	44263	0.0570473	0.256061	0	0	4.53054	12.9749	BTG1;STK17A;IER3IP1	.
	cellular response to interleukin-21 (GO:0098757)	44263	0.0570473	0.256061	0	0	4.53054	12.9749	STAT3;IL21R;JAK3	.
	T-helper 17 cell differentiation (GO:0072539)	44263	0.0570473	0.256061	0	0	4.53054	12.9749	STAT3;SLAMF6;LY9	.
	interleukin-17-mediated signaling pathway (GO:0097400)	44263	0.0570473	0.256061	0	0	4.53054	12.9749	IL17RE;IL17RC;IL17RA	.
	negative regulation of toll-like receptor 4 signaling pathway (GO:0034144)	44263	0.0570473	0.256061	0	0	4.53054	12.9749	LYN;ACOD1;RAB7B	.
	interleukin-21-mediated signaling pathway (GO:0038114)	44263	0.0570473	0.256061	0	0	4.53054	12.9749	STAT3;IL21R;JAK3	.
	cellular response to UV-B (GO:0071493)	44263	0.0570473	0.256061	0	0	4.53054	12.9749	STK11;CDKN1A;HYAL1	.
	plasma membrane to endosome transport (GO:0048227)	44263	0.0570473	0.256061	0	0	4.53054	12.9749	RAB5C;SORT1;RAB11A	.
	T-helper cell lineage commitment (GO:0002295)	44263	0.0570473	0.256061	0	0	4.53054	12.9749	STAT3;SLAMF6;LY9	.
	regulation of transcription from RNA polymerase II promoter in response to oxidative stress (GO:0043619)	44263	0.0570473	0.256061	0	0	4.53054	12.9749	SESN2;HMOX1;ANKRD2	.
	peptidyl-lysine hydroxylation (GO:0017185)	44263	0.0570473	0.256061	0	0	4.53054	12.9749	PLOD3;PLOD1;JMJD6	.
	positive regulation of protein localization to cell surface (GO:2000010)	44263	0.0570473	0.256061	0	0	4.53054	12.9749	STX4;SNX33;STX3	.
	positive regulation of metanephros development (GO:0072216)	44263	0.0570473	0.256061	0	0	4.53054	12.9749	RET;PAX8;BASP1	.
	regulation of metaphase/anaphase transition of cell cycle (GO:1902099)	44263	0.0570473	0.256061	0	0	4.53054	12.9749	NEK6;HECW2;PLK1	.
	regulation of chemokine secretion (GO:0090196)	44263	0.0570473	0.256061	0	0	4.53054	12.9749	PYCARD;CSF1R;LPL	.
	regulation of aspartic-type endopeptidase activity involved in amyloid precursor protein catabolic process (GO:1902959)	44263	0.0570473	0.256061	0	0	4.53054	12.9749	LYN;SORL1;PICALM	.
	fatty acid alpha-oxidation (GO:0001561)	44263	0.0570473	0.256061	0	0	4.53054	12.9749	PHYH;SLC25A17;HACL1	.
	regulation of nitrogen compound metabolic process (GO:0051171)	44263	0.0570473	0.256061	0	0	4.53054	12.9749	SCARB1;LRP1;LDLR	.
	catecholamine catabolic process (GO:0042424)	44263	0.0570473	0.256061	0	0	4.53054	12.9749	MOXD1;MAOA;COMT	.
	regulation of lipid transport (GO:0032368)	44263	0.0570473	0.256061	0	0	4.53054	12.9749	LRP1;ITGB3;NR1H3	.
	negative regulation of exocytosis (GO:0045920)	44263	0.0570473	0.256061	0	0	4.53054	12.9749	ANXA1;STXBP6;RAB7A	.
	pyrimidine nucleobase metabolic process (GO:0006206)	44263	0.0570473	0.256061	0	0	4.53054	12.9749	CDA;DPYS;DPYD	.
	granulocyte differentiation (GO:0030851)	44263	0.0570473	0.256061	0	0	4.53054	12.9749	JAGN1;CEBPE;GATA1	.
	actin filament network formation (GO:0051639)	44263	0.0570473	0.256061	0	0	4.53054	12.9749	CARMIL1;ACTN1;LCP1	.
	immunoglobulin mediated immune response (GO:0016064)	44263	0.0570473	0.256061	0	0	4.53054	12.9749	FCER1G;FCGR2B;GAPT	.
	lipoprotein localization (GO:0044872)	44263	0.0570473	0.256061	0	0	4.53054	12.9749	LRP1;PPARG;CD36	.
	interleukin-1 beta secretion (GO:0050702)	44263	0.0570473	0.256061	0	0	4.53054	12.9749	NLRC4;CD36;TLR4	.
	cellular response to interleukin-17 (GO:0097398)	44263	0.0570473	0.256061	0	0	4.53054	12.9749	IL17RE;IL17RC;IL17RA	.
	response to vitamin D (GO:0033280)	44263	0.0570473	0.256061	0	0	4.53054	12.9749	CDKN2D;BGLAP;ALPL	.
	regulation of vascular associated smooth muscle cell migration (GO:1904752)	44263	0.0570473	0.256061	0	0	4.53054	12.9749	DOCK5;DOCK4;TPM1	.
	positive regulation of smooth muscle cell apoptotic process (GO:0034393)	44263	0.0570473	0.256061	0	0	4.53054	12.9749	IL12B;PPARG;E2F3	.
	cellular response to prostaglandin E stimulus (GO:0071380)	44263	0.0570473	0.256061	0	0	4.53054	12.9749	PTGER4;GNG2;ADCY6	.
	negative regulation of glial cell differentiation (GO:0045686)	44263	0.0570473	0.256061	0	0	4.53054	12.9749	NOTCH1;DAAM2;F2	.
	myelin maintenance (GO:0043217)	44263	0.0570473	0.256061	0	0	4.53054	12.9749	MYRF;EPB41L3;CLU	.
	negative regulation of interleukin-1 production (GO:0032692)	44263	0.0570473	0.256061	0	0	4.53054	12.9749	IL10;NLRP12;MEFV	.
	negative regulation of platelet aggregation (GO:0090331)	44263	0.0570473	0.256061	0	0	4.53054	12.9749	PRKCD;CD9;ALOX12	.
	amyloid fibril formation (GO:1990000)	44263	0.0570473	0.256061	0	0	4.53054	12.9749	GSN;RIPK1;CD36	.
	regulation of PERK-mediated unfolded protein response (GO:1903897)	44263	0.0570473	0.256061	0	0	4.53054	12.9749	PPP1R15A;PTPN1;TMEM33	.
	regulation of MyD88-independent toll-like receptor signaling pathway (GO:0034127)	44263	0.0570473	0.256061	0	0	4.53054	12.9749	LY96;CD14;TLR4	.
	regulation of tumor necrosis factor-mediated signaling pathway (GO:0010803)	20760	0.0575339	0.257977	0	0	1.84792	5.2765	PYCARD;IKBKB;SPHK1;CASP4;UBC;CASP1;RIPK1;RBCK1;TANK;PTPN2;TNFRSF1A	.
	intrinsic apoptotic signaling pathway by p53 class mediator (GO:0072332)	15950	0.0578971	0.259067	0	0	2.00062	5.69994	PYCARD;DDX5;STK11;DDIT4;BCL3;ZNF385C;KRCC1;ZNF385A;PHLDA3	.
	response to unfolded protein (GO:0006986)	15950	0.0578971	0.259067	0	0	2.00062	5.69994	DNAJB1;ERP44;HSP90AA1;HSPH1;DDIT3;HSPB2;HYOU1;OPTN;HERPUD1	.
	inorganic cation transmembrane transport (GO:0098662)	23/140	0.0583126	0.260656	0	0	1.48767	4.22787	ATP6V0B;TRPC5;ATP6V0E1;SLC24A3;ATP6AP1;SLC11A1;SLC30A4;SLC40A1;CACNA2D4;TCIRG1;ATP2C2;PKD2;MCOLN1;SLC8A1;P2RX4;UCP2;ATP6V1B2;ATP6V1E1;ATP6V0D1;SLC39A1;ATP6V1C1;ATP6V1F;SCN2B	.
	positive regulation of MAPK cascade (GO:0043410)	43/289	0.0584895	0.261176	0	0	1.32452	3.76018	RET;CCL14;TENM1;CSF1R;SEMA7A;RAMP3;NOTCH1;FLT3;FLT4;PELI2;C5AR1;NOD2;PRKCZ;PIK3R5;PYCARD;IRAK1;GLIPR2;ARL6IP5;S100A12;PTK2B;LGALS9;CD36;CCL16;CCR1;ATP6AP1;INSR;CARD9;OSM;LMTK2;ABCA7;TNFRSF1B;MERTK;TIRAP;TNFRSF1A;MARCO;FAS;CHI3L1;LAMTOR1;ROR2;LTBR;CD24;RAF1;CD44	.
	regulation of phosphorylation (GO:0042325)	20/119	0.0607544	0.270216	0	0	1.52843	4.28099	LYN;CDKN2D;CDKN1A;CDKN2B;PGAM1;STAT2;FN1;NLRC5;PRKAG2;PSEN1;BTBD10;THBS1;EREG;IKBKB;SDCBP;PINK1;SESN2;PLXNB2;CD24;SLC25A33	.
	positive regulation of receptor activity (GO:2000273)	13728	0.0607938	0.270216	0	0	2.08463	5.83753	NCF1;ANXA2;HFE;BUD31;TGFA;PKD2;CALM2;EREG	.
	positive regulation of axonogenesis (GO:0050772)	13728	0.0607938	0.270216	0	0	2.08463	5.83753	SHTN1;SEMA7A;SEMA4D;TWF2;PLXNA2;PLXNB3;PLXNB2;RHOA	.
	regulation of osteoclast differentiation (GO:0045670)	13728	0.0607938	0.270216	0	0	2.08463	5.83753	CCR1;CEBPB;MAFB;BGLAP;IL23A;OCSTAMP;IL12B;TLR4	.
	positive regulation of proteasomal ubiquitin-dependent protein catabolic process (GO:0032436)	13/70	0.0608893	0.270216	0	0	1.72444	4.82618	GSK3A;PLK1;RNF19B;CSNK1E;CLU;HERPUD1;RNF144B;RNF217;ARIH2;LONRF3;TRIB1;LONRF1;NFE2L2	.
	stress-activated protein kinase signaling cascade (GO:0031098)	13/70	0.0608893	0.270216	0	0	1.72444	4.82618	MAP2K4;MAP3K3;MAP2K2;STK3;MAPK13;IKBKB;PAK1;STK24;TNIP2;UBC;MAP3K20;MAPK1;BTRC	.
	fatty acid oxidation (GO:0019395)	18537	0.0615237	0.272751	0	0	1.88964	5.26895	ACADVL;PHYH;ACAA2;SLC25A17;AUH;ALOX12;HACL1;ACAA1;ADIPOR1;PPARD	.
	protein modification process (GO:0036211)	15/84	0.0621946	0.274156	0	0	1.64399	4.56615	ATG3;UBE2D3;UBE2L6;WWP2;PLOD1;PHKA2;UBE2L3;TGM1;UBL5;MSRA;MAN2B1;PADI4;ATG7;TGM3;PIGH	.
	positive regulation of transforming growth factor beta receptor signaling pathway (GO:0030511)	44335	0.062666	0.274156	0	0	2.69768	7.47241	SDCBP;CDKN2B;STK11;CITED2;THBS1	.
	negative regulation of lymphocyte activation (GO:0051250)	44335	0.062666	0.274156	0	0	2.69768	7.47241	LGALS3;TNFAIP8L2;FCGR2B;SAMSN1;JAK3	.
	negative regulation of phosphate metabolic process (GO:0045936)	44335	0.062666	0.274156	0	0	2.69768	7.47241	CDKN2D;CDA;CDKN1A;CDKN2B;PLEK	.
	endoplasmic reticulum mannose trimming (GO:1904380)	44335	0.062666	0.274156	0	0	2.69768	7.47241	OS9;EDEM2;UBC;DERL2;RNF5	.
	acetylcholine receptor signaling pathway (GO:0095500)	44335	0.062666	0.274156	0	0	2.69768	7.47241	GRK2;GNA11;RGS10;PLCB1;CDK5R1	.
	extrinsic apoptotic signaling pathway in absence of ligand (GO:0097192)	44335	0.062666	0.274156	0	0	2.69768	7.47241	GSK3A;CASP3;BCL2L2;BCL2L1;MCL1	.
	purine ribonucleotide catabolic process (GO:0009154)	44335	0.062666	0.274156	0	0	2.69768	7.47241	NUDT7;PDE4A;AMPD3;HPRT1;NUDT3	.
	nucleotide-sugar biosynthetic process (GO:0009226)	44335	0.062666	0.274156	0	0	2.69768	7.47241	NAGK;UGP2;AMDHD2;UAP1;RENBP	.
	regulation of cAMP biosynthetic process (GO:0030817)	44335	0.062666	0.274156	0	0	2.69768	7.47241	CAP1;RAMP2;RAMP3;SCT;CALM2	.
	positive regulation of cellular response to transforming growth factor beta stimulus (GO:1903846)	44335	0.062666	0.274156	0	0	2.69768	7.47241	SDCBP;CDKN2B;STK11;CITED2;THBS1	.
	response to interferon-beta (GO:0035456)	44335	0.062666	0.274156	0	0	2.69768	7.47241	IFITM3;IFNAR2;IFITM1;IRF1;ACOD1	.
	NADP metabolic process (GO:0006739)	44335	0.062666	0.274156	0	0	2.69768	7.47241	G6PD;TALDO1;PGD;RBKS;DERA	.
	cellular protein metabolic process (GO:0044267)	68/484	0.0629231	0.27451	0	0	1.24002	3.4297	GALNT11;UBE2D3;UBE2L6;PLOD1;LAMC1;ZDHHC2;SPPL3;UBE2L3;TGM1;PCMT1;UBL5;MRPL1;CTSH;TGM3;ATG3;RPS9;APLP2;SHISA5;F2;PHKA2;MRPS6;VCAN;ADORA2A;ADORA2B;FAM20C;PADI4;MFGE8;PIGH;LTF;SERPINC1;HM13;IGHMBP2;DENND3;FURIN;CSF2RB;PSEN1;RPS4Y1;FSTL1;RNF5;APH1A;CST3;GGA1;BGLAP;UBC;GPC3;RIPK1;ATG7;SEC11A;GSN;COA1;ABCA3;SIAH1;FN1;WWP2;UBE2G1;LYZ;SORL1;PGA5;MSRA;TNIP1;MSRB3;MAN2B1;P4HB;TGFBI;ITM2B;LGMN;MSRB1;PNPLA2	.
	negative regulation of cell-cell adhesion (GO:0022408)	44408	0.0630649	0.27451	0	0	2.20375	6.09025	IL10;IL1RN;MAPK7;MBP;FXYD5;KLF4;ASS1	.
	cofactor biosynthetic process (GO:0051188)	44408	0.0630649	0.27451	0	0	2.20375	6.09025	NFU1;SLC25A16;MOCS2;MOCOS;MOCS1;GPHN;ISCU	.
	vesicle-mediated transport to the plasma membrane (GO:0098876)	44408	0.0630649	0.27451	0	0	2.20375	6.09025	CHIC2;EXOC6B;VPS26A;STXBP6;WASHC1;STEAP2;VPS39	.
	positive regulation of release of sequestered calcium ion into cytosol (GO:0051281)	44408	0.0630649	0.27451	0	0	2.20375	6.09025	CEMIP;CAPN3;THY1;PKD2;F2;CALM2;F2RL3	.
	IRE1-mediated unfolded protein response (GO:0036498)	21125	0.0640754	0.275357	0	0	1.80764	4.96685	GSK3A;ACADVL;CTDSP2;SRPRA;DNAJB9;WIPI1;HYOU1;KDELR3;SEC62;TLN1;ATP6V0D1	.
	regulation of centrosome duplication (GO:0010824)	44372	0.0640885	0.275357	0	0	2.38566	6.55459	FBXW5;PLK2;CHMP2A;CHMP3;CHMP4B;CHMP5	.
	response to amyloid-beta (GO:1904645)	44372	0.0640885	0.275357	0	0	2.38566	6.55459	LRP1;CASP4;PSEN1;CD36;FCGR2B;TLR4	.
	regulation of interleukin-10 production (GO:0032653)	44372	0.0640885	0.275357	0	0	2.38566	6.55459	IL23A;IL12B;NOD2;FCGR2B;JAK3;TLR4	.
	cellular response to vascular endothelial growth factor stimulus (GO:0035924)	44372	0.0640885	0.275357	0	0	2.38566	6.55459	RAMP2;NOTCH1;ANXA1;FLT4;MAPKAPK2;MAPK14	.
	regulation of apoptotic signaling pathway (GO:2001233)	44372	0.0640885	0.275357	0	0	2.38566	6.55459	PYCARD;DEPTOR;SGMS1;CTSH;FAS;TMBIM6	.
	long-chain fatty acid transport (GO:0015909)	44372	0.0640885	0.275357	0	0	2.38566	6.55459	CPT1A;ACSL1;PRKAG2;PPARG;SLC25A20;CD36	.
	long-chain fatty-acyl-CoA metabolic process (GO:0035336)	44372	0.0640885	0.275357	0	0	2.38566	6.55459	DGAT2;ACOT7;ACSL1;ACSL6;FAR2;HACD2	.
	protein depolymerization (GO:0051261)	44372	0.0640885	0.275357	0	0	2.38566	6.55459	WDR1;MICAL1;CFL1;TWF2;DSTN;KIF24	.
	peptidyl-tyrosine dephosphorylation (GO:0035335)	44372	0.0640885	0.275357	0	0	2.38566	6.55459	PTPN1;DUSP1;PTPRO;PTPN9;PTPN6;PTPN2	.
	positive regulation of calcium ion transmembrane transport (GO:1904427)	44372	0.0640885	0.275357	0	0	2.38566	6.55459	CEMIP;RAMP3;CAPN3;THY1;F2;F2RL3	.
	signal peptide processing (GO:0006465)	44372	0.0640885	0.275357	0	0	2.38566	6.55459	BGLAP;HM13;FURIN;F2;SPPL3;SEC11A	.
	nucleotide-binding domain, leucine rich repeat containing receptor signaling pathway (GO:0035872)	44372	0.0640885	0.275357	0	0	2.38566	6.55459	IKBKB;IRAK1;IRAK2;UBC;NOD1;NOD2	.
	regulation of dendrite morphogenesis (GO:0048814)	16316	0.0655483	0.280791	0	0	1.94335	5.29556	FXR2;CUX1;FBXW8;SEMA4D;SS18L1;HECW2;CFL1;OBSL1;CDK5R1	.
	heart contraction (GO:0060047)	16316	0.0655483	0.280791	0	0	1.94335	5.29556	GRK2;GPX1;ACE;GAA;TPM1;TNNI2;DMD;SLC8A1;SCN2B	.
	positive regulation of viral life cycle (GO:1903902)	16316	0.0655483	0.280791	0	0	1.94335	5.29556	SRPK2;STAU1;CHMP2A;CHMP3;CHMP4B;ADARB1;LGALS9;VPS37B;P4HB	.
	positive regulation of lymphocyte proliferation (GO:0050671)	13/71	0.0668989	0.286009	0	0	1.69461	4.5832	ANXA1;IL18;CLECL1;TIRAP;TNFSF13B;CCDC88B;BST1;PNP;IL23A;IL7;IL1B;IL12B;JAK3	.
	response to insulin (GO:0032868)	13/71	0.0668989	0.286009	0	0	1.69461	4.5832	HDAC5;GSK3A;SORT1;INSR;USF1;KAT2B;RAB31;PKM;CAPN10;RAB13;PPARG;SLC25A33;RHOQ	.
	positive regulation of cell differentiation (GO:0045597)	30/194	0.0677246	0.289253	0	0	1.38481	3.72834	ACVRL1;IFITM1;CEBPB;NOTCH1;LPL;SDCBP;ZFP36;GLIPR2;GPC1;RPS6KA1;CTNNA1;CD36;JUNB;IL6R;ZNF385A;CMKLR1;ACVR1;JUN;ATP6AP1;IL18;MAPK14;ACVR2B;PAX8;FES;IL1B;SNAI1;PPARG;WDFY2;PPARD;LTF	.
	regulation of exocytosis (GO:0017157)	18902	0.0688543	0.293788	0	0	1.84345	4.93262	RAB21;ANXA1;RALB;ATP6AP1;RAB3D;RAB13;STX4;RAB27B;STXBP6;UNC13D	.
	nucleoside salvage (GO:0043174)	44300	0.071728	0.301579	0	0	3.0208	7.95941	CDA;HPRT1;UPP1;DCK	.
	negative regulation of receptor-mediated endocytosis (GO:0048261)	44300	0.071728	0.301579	0	0	3.0208	7.95941	LRPAP1;SDCBP;RAC1;PICALM	.
	regulation of platelet aggregation (GO:0090330)	44300	0.071728	0.301579	0	0	3.0208	7.95941	LYN;PRKCD;CD9;ALOX12	.
	regulation of secretion (GO:0051046)	44300	0.071728	0.301579	0	0	3.0208	7.95941	POFUT2;MYO6;NRG1;SGK1	.
	negative regulation of focal adhesion assembly (GO:0051895)	44300	0.071728	0.301579	0	0	3.0208	7.95941	ACVRL1;SRC;DLC1;THBS1	.
	cell surface receptor signaling pathway involved in heart development (GO:0061311)	44300	0.071728	0.301579	0	0	3.0208	7.95941	ACVR1;GALNT11;NOTCH1;SNAI1	.
	pyrimidine-containing compound catabolic process (GO:0072529)	44300	0.071728	0.301579	0	0	3.0208	7.95941	NT5C3A;DPYS;DPYD;UPP1	.
	negative regulation of biomineral tissue development (GO:0070168)	44300	0.071728	0.301579	0	0	3.0208	7.95941	CCR1;SRGN;ECM1;PTK2B	.
	smooth muscle contraction (GO:0006939)	44300	0.071728	0.301579	0	0	3.0208	7.95941	HMCN2;SLC8A1;TPCN2;MYLK	.
	regulation of cyclin-dependent protein serine/threonine kinase activity involved in G1/S transition of mitotic cell cycle (GO:0031657)	44300	0.071728	0.301579	0	0	3.0208	7.95941	CDKN2D;CDKN2B;CDK6;PKD2	.
	necroptotic process (GO:0070266)	44300	0.071728	0.301579	0	0	3.0208	7.95941	LY96;RIPK1;CD14;TLR4	.
	adaptive immune response based on somatic recombination of immune receptors built from immunoglobulin superfamily domains (GO:0002460)	44300	0.071728	0.301579	0	0	3.0208	7.95941	IL18;IL12B;TLR4;IL18BP	.
	negative regulation of smooth muscle cell migration (GO:0014912)	44300	0.071728	0.301579	0	0	3.0208	7.95941	LRP1;SERPINE1;TPM1;TRIB1	.
	purine nucleotide catabolic process (GO:0006195)	44300	0.071728	0.301579	0	0	3.0208	7.95941	GPX1;PNP;NT5C2;XDH	.
	interleukin-6-mediated signaling pathway (GO:0070102)	44300	0.071728	0.301579	0	0	3.0208	7.95941	SOCS3;STAT3;JAK2;IL6R	.
	regulation of lipid metabolic process (GO:0019216)	17/100	0.0725968	0.304639	0	0	1.54901	4.0628	CPT1A;ACSL1;PRKAG2;ADIPOR1;TIAM2;LACTB;GLIPR1;RXRA;NPC2;IL1B;PSAP;PPARG;PLIN2;CD36;TBL1X;RGL1;PPARD	.
	cellular response to transforming growth factor beta stimulus (GO:0071560)	17/100	0.0725968	0.304639	0	0	1.54901	4.0628	ACVR1;ACVRL1;SMAD1;JUN;ZFYVE9;SMURF1;SRC;PXN;FURIN;F11R;PRKCZ;RHOA;MAPK7;PARD3;UBC;ID1;ZYX	.
	positive regulation of T cell differentiation (GO:0045582)	11871	0.0729172	0.304798	0	0	2.11548	5.53923	PNP;VNN1;BCL6;IL7;IL23A;IL12B;TNFSF9	.
	aminoglycan catabolic process (GO:0006026)	11871	0.0729172	0.304798	0	0	2.11548	5.53923	SDC4;NAGLU;GPC1;SDC3;GPC3;CHI3L1;SGSH	.
	positive regulation of calcium ion transport into cytosol (GO:0010524)	11871	0.0729172	0.304798	0	0	2.11548	5.53923	CEMIP;RAMP3;P2RX4;CAPN3;THY1;F2;F2RL3	.
	positive regulation of dendrite development (GO:1900006)	11871	0.0729172	0.304798	0	0	2.11548	5.53923	CUX1;FBXW8;SS18L1;NEURL1;PSEN1;VLDLR;OBSL1	.
	cellular transition metal ion homeostasis (GO:0046916)	16/93	0.0731803	0.305158	0	0	1.57136	4.10883	ARF1;ATP6AP1;SLC11A1;SLC40A1;ATOX1;FTH1;UBC;LCN2;HMOX1;SLC39A8;ACO1;ATP6V0D1;FBXL5;ISCU;HMOX2;FTL	.
	regulation of transcription from RNA polymerase II promoter in response to stress (GO:0043618)	16/93	0.0731803	0.305158	0	0	1.57136	4.10883	EGLN3;EGLN2;UBE2D3;UBE2D1;PSMA6;DNAJB1;PSMD6;MAPK7;BAG3;UBC;HSF4;HMOX1;ANKRD2;ELOC;ATF3;NFE2L2	.
	regulation of GTPase activity (GO:0043087)	29/188	0.0732825	0.305158	0	0	1.38055	3.60797	CCL14;THY1;F11R;RAP1GAP;FGD1;FGD3;ARHGAP21;FGD6;CHN2;PLXNA2;RSU1;SRGAP2;CCL16;TBC1D10B;NDEL1;SEMA4D;OCRL;ARAP1;ADAP1;GMIP;VAV1;TBC1D2;SNX18;TBC1D7;PLXNB3;RGS10;PLXNB2;ARHGEF5;PICALM	.
	Rho protein signal transduction (GO:0007266)	13/72	0.0732861	0.305158	0	0	1.66579	4.35336	ARHGEF11;RHOG;WAS;MYO9B;RHOA;SHTN1;PAK1;CDC42EP4;CFL1;CDC42EP3;TAX1BP3;RAC1;RHOQ	.
	cation transport (GO:0006812)	14/79	0.0735971	0.306158	0	0	1.62848	4.24895	TIMM8B;SLC1A1;SLC3A2;SLC1A5;PKD1L3;MCOLN1;ATOX1;SLC25A29;P2RX4;SLC6A9;P2RX1;SLC38A7;ANO10;SLC39A1	.
	negative regulation of ossification (GO:0030279)	16681	0.0738069	0.306735	0	0	1.88926	4.92398	CCR1;SRGN;ECM1;NOTCH1;CDK6;CHSY1;SEMA4D;PTK2B;KREMEN2	.
	plasma membrane bounded cell projection assembly (GO:0120031)	36/241	0.0742552	0.308302	0	0	1.32976	3.4577	GALNT11;NOTCH1;AVIL;CEP19;PTPRO;SNX10;FGD1;MYLK;FGD3;SDCBP;FGD6;OPHN1;TCTN3;BBS9;RAC1;SRGAP2;CC2D2A;ATP6V1D;RILP;ACTR3;CARMIL1;GSN;RFX2;KIF24;OCRL;FUZ;PARVB;EHD1;DNM3;SHTN1;RILPL2;WDR5B;ALPK3;FXYD5;ATP6V0D1;CFAP54	.
	regulation of p38MAPK cascade (GO:1900744)	44373	0.0754097	0.309395	0	0	2.26625	5.85786	NCF1;GADD45B;GADD45A;IL1B;XDH;GADD45G	.
	regulation of supramolecular fiber organization (GO:1902903)	44373	0.0754097	0.309395	0	0	2.26625	5.85786	GPX1;MAP2;MAP1B;WAS;BRK1;SSH3	.
	regulation of muscle contraction (GO:0006937)	44373	0.0754097	0.309395	0	0	2.26625	5.85786	TPM1;MYBPH;NMUR2;SRI;ENO1;MYL9	.
	regulation of centrosome cycle (GO:0046605)	44373	0.0754097	0.309395	0	0	2.26625	5.85786	FBXW5;CHMP2A;CHMP3;CHMP4B;ATF5;CHMP5	.
	Golgi to endosome transport (GO:0006895)	44336	0.0758173	0.309395	0	0	2.51769	6.49421	SYS1;SORT1;WIPI1;AP2A1;CORO7	.
	negative regulation of actin filament bundle assembly (GO:0032232)	44336	0.0758173	0.309395	0	0	2.51769	6.49421	DLC1;WAS;ARHGAP28;ARAP1;WASF2	.
	viral budding via host ESCRT complex (GO:0039702)	44336	0.0758173	0.309395	0	0	2.51769	6.49421	VPS37C;CHMP2A;CHMP3;CHMP4B;VPS37B	.
	response to progesterone (GO:0032570)	44336	0.0758173	0.309395	0	0	2.51769	6.49421	SRC;WBP2;NR1H3;ACOD1;THBS1	.
	purine nucleotide metabolic process (GO:0006163)	44336	0.0758173	0.309395	0	0	2.51769	6.49421	GPX1;PNP;HPRT1;NT5C2;XDH	.
	regulation of response to cytokine stimulus (GO:0060759)	44336	0.0758173	0.309395	0	0	2.51769	6.49421	MAPK7;IRAK1;IRAK2;KLF4;CD24	.
	negative regulation of plasma membrane bounded cell projection assembly (GO:0120033)	44336	0.0758173	0.309395	0	0	2.51769	6.49421	CAPZB;PRKCD;TBC1D7;PLXNB3;RAP1GAP	.
	chondroitin sulfate biosynthetic process (GO:0030206)	44336	0.0758173	0.309395	0	0	2.51769	6.49421	VCAN;CHSY1;CHPF2;BGN;CHST15	.
	cellular response to steroid hormone stimulus (GO:0071383)	44336	0.0758173	0.309395	0	0	2.51769	6.49421	SRC;ACOD1;ADTRP;TFPI;UBE2L3	.
	immune response-activating cell surface receptor signaling pathway (GO:0002429)	44336	0.0758173	0.309395	0	0	2.51769	6.49421	LYN;FCER1G;C5AR2;C5AR1;SPG21	.
	regulation of transport (GO:0051049)	44336	0.0758173	0.309395	0	0	2.51769	6.49421	POFUT2;RAB25;FES;MYO6;RAB11A	.
	cell projection assembly (GO:0030031)	44336	0.0758173	0.309395	0	0	2.51769	6.49421	PARVG;RHOG;PARVB;RAC1;RHOQ	.
	regulation of cholesterol transport (GO:0032374)	44336	0.0758173	0.309395	0	0	2.51769	6.49421	LRP1;NR1H3;TSPO;PPARG;LAMTOR1	.
	plasma membrane bounded cell projection morphogenesis (GO:0120039)	19268	0.0767157	0.309395	0	0	1.79945	4.62036	SHTN1;PAK1;DBNL;STK24;EPB41L3;RHOG;RAC1;SGK1;SRGAP2;DNM2	.
	triglyceride metabolic process (GO:0006641)	19268	0.0767157	0.309395	0	0	1.79945	4.62036	GK5;DGAT2;GK;GPAT4;FABP6;LPL;GPAT3;LPIN2;LPIN3;PNPLA2	.
	protein processing (GO:0016485)	17/101	0.0782025	0.309395	0	0	1.53048	3.90037	SRGN;KLK1;HM13;ECE1;FURIN;PSEN1;F2;SPPL3;CTSS;APH1A;BGLAP;UQCRC1;CASP1;CTSH;GGT1;SEC11A;LGMN	.
	positive regulation of intracellular protein transport (GO:0090316)	24/152	0.0782175	0.309395	0	0	1.41867	3.61515	OSCP1;TENM1;TCF7L2;CEMIP;GSK3A;UBE2D3;PRKCD;NRG1;PRR5L;HNMT;OAZ1;SORL1;OAZ2;UBE2L3;CYB5R1;UBL5;PINK1;SLC17A9;BAG3;CTSK;IL1B;CHORDC1;ITGAX;ARIH2	.
	regulation of interleukin-6 biosynthetic process (GO:0045408)	44264	0.0783161	0.309395	0	0	3.77524	9.61553	NLRP12;TIRAP;EREG	.
	epithelial cell apoptotic process (GO:1904019)	44264	0.0783161	0.309395	0	0	3.77524	9.61553	IL10;GSN;CAPN10	.
	regulation of amyloid precursor protein biosynthetic process (GO:0042984)	44264	0.0783161	0.309395	0	0	3.77524	9.61553	SOAT1;ABCA7;ITM2B	.
	negative regulation of T cell apoptotic process (GO:0070233)	44264	0.0783161	0.309395	0	0	3.77524	9.61553	TSC22D3;FADD;JAK3	.
	positive regulation of coagulation (GO:0050820)	44264	0.0783161	0.309395	0	0	3.77524	9.61553	SERPINE1;F2;THBS1	.
	Cdc42 protein signal transduction (GO:0032488)	44264	0.0783161	0.309395	0	0	3.77524	9.61553	SHTN1;WAS;RHOQ	.
	positive regulation of leukocyte apoptotic process (GO:2000108)	44264	0.0783161	0.309395	0	0	3.77524	9.61553	LYN;PIK3CD;LGALS9	.
	semaphorin-plexin signaling pathway involved in axon guidance (GO:1902287)	44264	0.0783161	0.309395	0	0	3.77524	9.61553	PLXNA2;PLXNB3;PLXNB2	.
	myelin assembly (GO:0032288)	44264	0.0783161	0.309395	0	0	3.77524	9.61553	GPC1;EPB41L3;CD9	.
	nicotinamide nucleotide biosynthetic process (GO:0019359)	44264	0.0783161	0.309395	0	0	3.77524	9.61553	NMNAT1;NAPRT;NADSYN1	.
	cellular response to oxygen levels (GO:0071453)	44264	0.0783161	0.309395	0	0	3.77524	9.61553	ATP6AP1;ATP6V0D1;CPEB4	.
	response to muramyl dipeptide (GO:0032495)	44264	0.0783161	0.309395	0	0	3.77524	9.61553	NOD1;NOD2;NLRP1	.
	interleukin-1 secretion (GO:0050701)	44264	0.0783161	0.309395	0	0	3.77524	9.61553	NLRC4;CD36;TLR4	.
	myeloid leukocyte mediated immunity (GO:0002444)	44264	0.0783161	0.309395	0	0	3.77524	9.61553	ACE;IRAK4;CXCL5	.
	Notch signaling involved in heart development (GO:0061314)	44264	0.0783161	0.309395	0	0	3.77524	9.61553	GALNT11;NOTCH1;SNAI1	.
	positive regulation of hemostasis (GO:1900048)	44264	0.0783161	0.309395	0	0	3.77524	9.61553	SERPINE1;F2;THBS1	.
	negative regulation of vascular endothelial growth factor receptor signaling pathway (GO:0030948)	44264	0.0783161	0.309395	0	0	3.77524	9.61553	PTPN1;HGS;EPN2	.
	toll-like receptor 3 signaling pathway (GO:0034138)	44264	0.0783161	0.309395	0	0	3.77524	9.61553	TNIP2;RIPK1;FADD	.
	positive regulation of cytokine production involved in inflammatory response (GO:1900017)	44264	0.0783161	0.309395	0	0	3.77524	9.61553	NOD2;TLR4;MYD88	.
	B cell homeostasis (GO:0001782)	44264	0.0783161	0.309395	0	0	3.77524	9.61553	LYN;PPP2R3C;GAPT	.
	negative regulation of amyloid-beta formation (GO:1902430)	44264	0.0783161	0.309395	0	0	3.77524	9.61553	ABCA7;CLU;SORL1	.
	cellular response to acidic pH (GO:0071468)	44264	0.0783161	0.309395	0	0	3.77524	9.61553	CHORDC1;PKD1L3;RAB11FIP5	.
	mesodermal cell differentiation (GO:0048333)	44264	0.0783161	0.309395	0	0	3.77524	9.61553	KDM6B;ITGB3;ITGA2	.
	neuron projection organization (GO:0106027)	44264	0.0783161	0.309395	0	0	3.77524	9.61553	ARF1;INSR;PSEN1	.
	lipoprotein biosynthetic process (GO:0042158)	44264	0.0783161	0.309395	0	0	3.77524	9.61553	WIPI1;WDR45;ATG7	.
	response to vitamin (GO:0033273)	44264	0.0783161	0.309395	0	0	3.77524	9.61553	CDKN2D;BGLAP;ALPL	.
	positive regulation of triglyceride biosynthetic process (GO:0010867)	44264	0.0783161	0.309395	0	0	3.77524	9.61553	SCARB1;NR1H3;LDLR	.
	regulation of muscle system process (GO:0090257)	44264	0.0783161	0.309395	0	0	3.77524	9.61553	TPM1;SRI;MYL9	.
	mature B cell differentiation involved in immune response (GO:0002313)	44264	0.0783161	0.309395	0	0	3.77524	9.61553	LFNG;PTK2B;FCGR2B	.
	ionotropic glutamate receptor signaling pathway (GO:0035235)	44264	0.0783161	0.309395	0	0	3.77524	9.61553	PTK2B;CPEB4;CDK5R1	.
	neurotrophin TRK receptor signaling pathway (GO:0048011)	44264	0.0783161	0.309395	0	0	3.77524	9.61553	SORT1;CASP3;DDIT4	.
	interleukin-1 beta production (GO:0032611)	44264	0.0783161	0.309395	0	0	3.77524	9.61553	NLRC4;CD36;TLR4	.
	dicarboxylic acid metabolic process (GO:0043648)	21855	0.0785587	0.31007	0	0	1.73213	4.40637	STAT5A;STAT5B;PHYH;GPT2;IDH1;MTHFD2L;HOGA1;NAGS;GGT1;FOLR2;ASS1	.
	positive regulation of fat cell differentiation (GO:0045600)	14458	0.07881	0.310211	0	0	1.94992	4.95419	CEBPB;ZFP36;PPARG;WDFY2;METRNL;ZNF385A;CMKLR1;PPARD	.
	Golgi to plasma membrane transport (GO:0006893)	14458	0.07881	0.310211	0	0	1.94992	4.95419	CHIC2;SYS1;RAB31;EXOC6B;STXBP6;GOLGA7;STEAP2;OPTN	.
	regulation of type I interferon-mediated signaling pathway (GO:0060338)	14458	0.07881	0.310211	0	0	1.94992	4.95419	IFNAR2;PTPN1;STAT2;NLRC5;PTPN6;FADD;TYK2;PTPN2	.
	positive regulation of cellular protein localization (GO:1903829)	24442	0.0796071	0.313063	0	0	1.67979	4.25095	TENM1;CARD10;NUMA1;SESN2;PLK1;PRR5L;STX4;SNX33;STX3;F2;OAZ1;OAZ2	.
	regulation of phosphatidylinositol 3-kinase signaling (GO:0014066)	14/80	0.0800453	0.3145	0	0	1.60372	4.04965	BECN1;NCF1;SEMA4D;FLT3;IL18;FGR;SELP;HCLS1;MAPK1;PIP5K1B;PTPN6;PIP5K1C;JAK2;IER3	.
	protein complex disassembly (GO:0043241)	17046	0.0826773	0.324546	0	0	1.83809	4.58202	VAMP8;GABARAPL2;MAP1LC3B;GABARAPL1;MAP1LC3A;STX17;LAMP2;CHMP3;GABARAP	.
	glycogen metabolic process (GO:0005977)	12236	0.0836258	0.326784	0	0	2.034	5.04716	GYS1;UGP2;GAA;UBC;PRKAG2;GYG1;PHKA2	.
	regulation of autophagosome assembly (GO:2000785)	12236	0.0836258	0.326784	0	0	2.034	5.04716	PINK1;RALB;MTMR3;RAB1B;TBC1D14;CHMP4B;TBC1D12	.
	establishment or maintenance of epithelial cell apical/basal polarity (GO:0045197)	12236	0.0836258	0.326784	0	0	2.034	5.04716	WDR1;OPHN1;PDZD11;PARD3;SCARF1;MARK2;RHOA	.
	positive regulation of Notch signaling pathway (GO:0045747)	12236	0.0836258	0.326784	0	0	2.034	5.04716	KAT2B;NOTCH1;STAT3;TSPAN17;BMP2K;NOD2;EPN2	.
	regulation of intracellular protein transport (GO:0033157)	12236	0.0836258	0.326784	0	0	2.034	5.04716	TENM1;PTPN1;PRR5L;LCP1;OAZ1;OAZ2;NDEL1	.
	positive regulation of phosphatidylinositol 3-kinase signaling (GO:0014068)	19633	0.0851116	0.332289	0	0	1.75751	4.33013	FGR;SELP;BECN1;NCF1;SEMA4D;FLT3;IL18;HCLS1;PTPN6;JAK2	.
	innate immune response activating cell surface receptor signaling pathway (GO:0002220)	20/124	0.0853365	0.332566	0	0	1.45453	3.57982	FCN1;LYN;FCER1G;SRC;PRKCD;CARD9;UBE2D1;ICAM3;CLEC4A;NFKBIA;IKBKB;PSMA6;PSMD6;PAK1;CLEC7A;UBC;FFAR2;BTRC;CLEC4E;RAF1	.
	dephosphorylation (GO:0016311)	20/124	0.0853365	0.332566	0	0	1.45453	3.57982	PTPN1;PTPRR;MTMR3;DUSP1;PPM1M;PTPRO;DAPP1;PPP2R5A;HDHD2;PPM1D;PTPRE;PLPP5;SDHAF2;CTDSP1;CTDSP2;PTPN9;PTPN6;BTRC;PPEF1;PTPN5	.
	divalent metal ion transport (GO:0070838)	15/88	0.0861545	0.335451	0	0	1.55355	3.80871	RYR1;CCR1;TRPC5;RAMP2;RAMP3;SLC11A1;SLC3A2;PSEN1;PKD2;SELENOK;GRIN3A;CDH23;NMUR2;SLC39A8;TPT1	.
	protein catabolic process (GO:0030163)	14/81	0.0868453	0.336577	0	0	1.57969	3.86018	HSP90AA1;NGLY1;SIAH1;DENND3;UBE2G1;CLN8;RNF5;PGA5;PSMA6;LAMP2;PPT1;RIPK1;SOCS6;CTSD	.
	regulation of TOR signaling (GO:0032006)	24807	0.0871445	0.336577	0	0	1.64915	4.02424	PREX1;GSK3A;DEPTOR;TMEM127;DDIT4;TBC1D7;GPAT3;LAMTOR2;LAMTOR1;LAMTOR3;FBXO9;LAMTOR5	.
	glucose homeostasis (GO:0042593)	13/74	0.0872097	0.336577	0	0	1.61099	3.92992	TCF7L2;INSR;STAT3;ADIPOR1;SLC8B1;USF1;HK1;HK3;STK11;PDK4;FFAR2;PPARG;PTPN2	.
	extrinsic apoptotic signaling pathway via death domain receptors (GO:0008625)	44374	0.0877877	0.336577	0	0	2.15821	5.25057	BAG3;SORT1;FADD;GABARAP;DEDD2;TNFRSF1A	.
	regulation of protein transport (GO:0051223)	44374	0.0877877	0.336577	0	0	2.15821	5.25057	SNX3;PTPN1;CHORDC1;WWP2;LCP1;NDEL1	.
	positive regulation of substrate adhesion-dependent cell spreading (GO:1900026)	44374	0.0877877	0.336577	0	0	2.15821	5.25057	DOCK5;CARMIL1;RAC1;OLFM4;DOCK1;CRKL	.
	regulation of blood vessel diameter (GO:0097746)	44374	0.0877877	0.336577	0	0	2.15821	5.25057	SCPEP1;ACE2;ACE;HMOX1;ECE1;ADCY6	.
	negative regulation of smooth muscle cell proliferation (GO:0048662)	44374	0.0877877	0.336577	0	0	2.15821	5.25057	IL10;TPM1;HMOX1;IL12B;PPARG;TRIB1	.
	endocytic recycling (GO:0032456)	44374	0.0877877	0.336577	0	0	2.15821	5.25057	EHD1;EHD2;EHD4;RAB13;STX6;LMTK2	.
	negative regulation of TOR signaling (GO:0032007)	14824	0.0888898	0.336577	0	0	1.88888	4.57176	PREX1;GSK3A;STK11;DEPTOR;TMEM127;SESN2;DDIT4;TBC1D7	.
	positive regulation of cytokine biosynthetic process (GO:0042108)	14824	0.0888898	0.336577	0	0	1.88888	4.57176	IL1B;HMOX1;IL12B;IL27;THBS1;TLR4;TIRAP;EREG	.
	pyrimidine nucleoside biosynthetic process (GO:0046134)	44301	0.0890939	0.336577	0	0	2.74602	6.64006	CDA;ACOD1;UPP1;DCK	.
	L-alpha-amino acid transmembrane transport (GO:1902475)	44301	0.0890939	0.336577	0	0	2.74602	6.64006	SLC25A29;SLC1A1;SLC3A2;SLC25A13	.
	regulation of interleukin-4 production (GO:0032673)	44301	0.0890939	0.336577	0	0	2.74602	6.64006	CEBPB;RARA;LGALS9;PRKCZ	.
	unsaturated fatty acid biosynthetic process (GO:0006636)	44301	0.0890939	0.336577	0	0	2.74602	6.64006	ALOX5;ALOX5AP;ALOX12;LTC4S	.
	intracellular lipid transport (GO:0032365)	44301	0.0890939	0.336577	0	0	2.74602	6.64006	CPT1A;NPC2;PRKAG2;SLC25A20	.
	cardiac muscle cell differentiation (GO:0055007)	44301	0.0890939	0.336577	0	0	2.74602	6.64006	ACVR1;KDM6B;NRG1;SLC8A1	.
	negative regulation of coagulation (GO:0050819)	44301	0.0890939	0.336577	0	0	2.74602	6.64006	PROCR;SERPINE1;ADTRP;TFPI	.
	dermatan sulfate proteoglycan biosynthetic process (GO:0050651)	44301	0.0890939	0.336577	0	0	2.74602	6.64006	VCAN;UST;DSE;BGN	.
	positive regulation of phosphoprotein phosphatase activity (GO:0032516)	44301	0.0890939	0.336577	0	0	2.74602	6.64006	PPP1R15A;PTPA;CD300A;CALM2	.
	cellular biogenic amine biosynthetic process (GO:0042401)	44301	0.0890939	0.336577	0	0	2.74602	6.64006	MOXD1;SMOX;SMS;SAT1	.
	regulation of mitotic sister chromatid separation (GO:0010965)	44301	0.0890939	0.336577	0	0	2.74602	6.64006	NEK6;HECW2;PLK1;TACC3	.
	mesenchymal cell development (GO:0014031)	44301	0.0890939	0.336577	0	0	2.74602	6.64006	NOTCH1;PEF1;NRG1;TAPT1	.
	vasculature development (GO:0001944)	44301	0.0890939	0.336577	0	0	2.74602	6.64006	ACVRL1;STK11;FLT4;ACVR2B	.
	positive regulation of membrane protein ectodomain proteolysis (GO:0051044)	44301	0.0890939	0.336577	0	0	2.74602	6.64006	IL1B;FURIN;SNX33;TNFRSF1B	.
	negative regulation of axon extension involved in axon guidance (GO:0048843)	44301	0.0890939	0.336577	0	0	2.74602	6.64006	SEMA4A;SEMA7A;SEMA4D;SEMA3C	.
	amide transport (GO:0042886)	44301	0.0890939	0.336577	0	0	2.74602	6.64006	SLC5A6;SLC38A7;FOLR3;FOLR2	.
	negative regulation of platelet activation (GO:0010544)	44301	0.0890939	0.336577	0	0	2.74602	6.64006	PRKCD;CD9;ALOX12;F2	.
	positive regulation of interleukin-4 production (GO:0032753)	44301	0.0890939	0.336577	0	0	2.74602	6.64006	CEBPB;RARA;LGALS9;PRKCZ	.
	cytoplasmic sequestering of protein (GO:0051220)	44301	0.0890939	0.336577	0	0	2.74602	6.64006	NFKBIA;MXI1;PKD2;NFKBIE	.
	negative regulation of anoikis (GO:2000811)	44301	0.0890939	0.336577	0	0	2.74602	6.64006	NOTCH1;SRC;PDK4;MCL1	.
	negative regulation of peptidyl-threonine phosphorylation (GO:0010801)	44301	0.0890939	0.336577	0	0	2.74602	6.64006	SPRED1;PARD3;DDIT4;CALM2	.
	negative regulation of adherens junction organization (GO:1903392)	44301	0.0890939	0.336577	0	0	2.74602	6.64006	ACVRL1;SRC;DLC1;THBS1	.
	positive regulation of stress-activated protein kinase signaling cascade (GO:0070304)	44301	0.0890939	0.336577	0	0	2.74602	6.64006	LYN;CARD9;ARL6IP5;NOD2	.
	positive regulation of macromolecule metabolic process (GO:0010604)	40/276	0.0902022	0.338597	0	0	1.28338	3.08742	CD63;RAMP2;GSK3A;RAMP3;CITED2;HFE;GBA;HMGB2;PIK3CD;ECE1;CLU;PPM1F;MAPK7;CTSH;MAPK1;LGALS9;CD36;ZBTB7B;SRPK2;SMAD1;PTPN1;GSN;ANXA2;VDR;SLC11A1;TESC;STAT3;FN1;MAPK14;KLF4;SELE;ACTA2;HGS;IL1B;TADA3;ADTRP;TLR4;MYD88;TLR2;NFE2L2	.
	hyaluronan metabolic process (GO:0030212)	44337	0.0903344	0.338597	0	0	2.3602	5.67449	CEMIP;HYAL1;IL1B;CHORDC1;CD44	.
	sterol transport (GO:0015918)	44337	0.0903344	0.338597	0	0	2.3602	5.67449	STARD3;NPC1;NPC2;CD36;LDLR	.
	positive regulation of T cell mediated immunity (GO:0002711)	44337	0.0903344	0.338597	0	0	2.3602	5.67449	IL23A;IL1B;IL12B;FADD;TANK	.
	negative regulation of cytokine biosynthetic process (GO:0042036)	44337	0.0903344	0.338597	0	0	2.3602	5.67449	IL10;NLRP12;ZFP36;BCL3;KLF4	.
	negative regulation of G-protein coupled receptor protein signaling pathway (GO:0045744)	44337	0.0903344	0.338597	0	0	2.3602	5.67449	RGS2;CXCL8;GRK2;PLEK;RPGRIP1L	.
	cellular response to alkaloid (GO:0071312)	44337	0.0903344	0.338597	0	0	2.3602	5.67449	RYR1;CASP7;CASP3;SPIDR;SLC8A1	.
	long-term synaptic potentiation (GO:0060291)	44337	0.0903344	0.338597	0	0	2.3602	5.67449	RGS14;PLK2;PTK2B;STX4;PRKCZ	.
	ERK1 and ERK2 cascade (GO:0070371)	44337	0.0903344	0.338597	0	0	2.3602	5.67449	PTGER4;MAP2K2;CTSH;MAPK1;LGALS9	.
	regulation of organelle assembly (GO:1902115)	17411	0.0921603	0.345142	0	0	1.78962	4.26686	ATG3;HCK;MTMR3;GSN;SRC;RAB1B;PLK2;TBC1D14;TBC1D12	.
	positive regulation of response to stimulus (GO:0048584)	19998	0.0940431	0.351887	0	0	1.71746	4.06009	SELENON;ARG2;DDX5;MAP2K2;PRKCD;NSMCE1;STX4;FCGR2B;YPEL3;C2CD2L	.
	glycosaminoglycan metabolic process (GO:0030203)	22586	0.0949357	0.354315	0	0	1.66265	3.91481	VCAN;NAGLU;SDC4;GPC1;SDC3;BGN;GPC3;HS3ST6;HS6ST1;HS6ST2;SGSH	.
	striated muscle contraction (GO:0006941)	22586	0.0949357	0.354315	0	0	1.66265	3.91481	ARHGEF11;GRK2;GAA;TPM1;MYBPH;TNNI2;DMD;ALDOA;OBSL1;SLC8A1;SCN2B	.
	negative regulation of phosphatase activity (GO:0010923)	25173	0.0951087	0.354315	0	0	1.61961	3.81051	TSKS;PPP1R15A;PTPA;PPP1R26;SPRED1;CSRNP3;ELL;FKBP15;PPP1R11;SEMA4D;CHORDC1;ZFYVE1	.
	peptidyl-threonine phosphorylation (GO:0018107)	25173	0.0951087	0.354315	0	0	1.61961	3.81051	ACVR1;GSK3A;STK11;PRKCD;ACOD1;LMTK2;MAPK1;ULK1;ACVR1B;CAMKK1;MARK2;CDK5R1	.
	negative regulation of T cell activation (GO:0050868)	12601	0.0951842	0.354315	0	0	1.95855	4.6064	IL10;LGALS3;CEBPB;SDC4;TNFAIP8L2;FCGR2B;JAK3	.
	regulation of interferon-beta production (GO:0032648)	12601	0.0951842	0.354315	0	0	1.95855	4.6064	PYCARD;RIOK3;IRF1;FLOT1;TLR4;TIRAP;TLR2	.
	cytoskeleton organization (GO:0007010)	20/126	0.0967708	0.359911	0	0	1.42692	3.33245	TPM1;ARAP3;THY1;CDC42BPB;FGD1;CNN2;NCKIPSD;FGD3;STRIP2;FGD6;CAPZB;PPP2R3C;MICAL1;CFL1;EPB41L3;PTK2B;TLN1;OBSL1;RHOQ;SIPA1	.
	negative regulation of cell motility (GO:2000146)	16/97	0.0984521	0.365849	0	0	1.49342	3.46202	ACVRL1;IFITM1;CITED2;SERPINE1;TPM1;WAS;ARAP3;FUZ;ADARB1;THY1;DACH1;STK24;DLC1;PLXNB3;SRGAP2;SRGAP1	.
	cell-matrix adhesion (GO:0007160)	15/90	0.100075	0.368391	0	0	1.51195	3.48027	CD63;ITGB3;ACTN1;ITGA2;ITGB2;LYPD3;THY1;OTOA;PARVG;DLC1;ZYX;EMILIN1;ITGB7;RAC1;CD44	.
	acute inflammatory response (GO:0002526)	44375	0.101203	0.368391	0	0	2.06	4.71868	CEBPB;VNN1;KLK1;DLC1;LBP;IL6R	.
	negative regulation of response to DNA damage stimulus (GO:2001021)	44375	0.101203	0.368391	0	0	2.06	4.71868	CDKN2D;SNAI1;CLU;CD44;TPT1;BCL2L1	.
	positive regulation of sprouting angiogenesis (GO:1903672)	44375	0.101203	0.368391	0	0	2.06	4.71868	MAP3K3;SMAD1;ANXA1;S100A1;HMOX1;KLF4	.
	positive regulation of protein tyrosine kinase activity (GO:0061098)	44375	0.101203	0.368391	0	0	2.06	4.71868	CSF1R;PTPN1;ACE;NCF1;TGFA;EREG	.
	regulation of NIK/NF-kappaB signaling (GO:1901222)	44375	0.101203	0.368391	0	0	2.06	4.71868	ADGRG3;NOD1;NOD2;CD14;ACTN4;ADIPOR1	.
	nucleotide-binding oligomerization domain containing signaling pathway (GO:0070423)	44375	0.101203	0.368391	0	0	2.06	4.71868	IKBKB;IRAK1;IRAK2;UBC;NOD1;NOD2	.
	regulation of receptor internalization (GO:0002090)	44375	0.101203	0.368391	0	0	2.06	4.71868	CD63;LRPAP1;SDCBP;ARF1;FLOT1;SELE	.
	positive regulation of phosphate metabolic process (GO:0045937)	44375	0.101203	0.368391	0	0	2.06	4.71868	SDCBP;PSEN1;THBS1;BTBD10;CD244;EREG	.
	glycoprotein metabolic process (GO:0009100)	17777	0.102253	0.368391	0	0	1.74363	3.97602	ERP44;MAN2A2;TNIP1;NGLY1;EDEM2;ST3GAL4;MAN2B1;LARGE1;ST6GALNAC6	.
	positive regulation of chemotaxis (GO:0050921)	17777	0.102253	0.368391	0	0	1.74363	3.97602	CXCL8;P2RX4;STX4;STX3;PPBP;THBS1;IL6R;CXCL5;PPM1F	.
	amino acid transport (GO:0006865)	17777	0.102253	0.368391	0	0	1.74363	3.97602	SLC6A6;SLC25A29;SLC7A7;SLC7A8;SLC38A7;SLC16A12;SLC38A6;SLC3A2;SLC1A5	.
	thyroid gland development (GO:0030878)	44265	0.102464	0.368391	0	0	3.23573	7.3718	TG;THRB;PAX8	.
	cellular response to growth hormone stimulus (GO:0071378)	44265	0.102464	0.368391	0	0	3.23573	7.3718	PXN;STAT3;JAK2	.
	positive regulation of receptor recycling (GO:0001921)	44265	0.102464	0.368391	0	0	3.23573	7.3718	RAMP3;ANXA2;ECE1	.
	positive regulation of amyloid-beta formation (GO:1902004)	44265	0.102464	0.368391	0	0	3.23573	7.3718	GSK3A;CLU;PICALM	.
	positive regulation of intracellular steroid hormone receptor signaling pathway (GO:0033145)	44265	0.102464	0.368391	0	0	3.23573	7.3718	PAK1;WBP2;BUD31	.
	glycerolipid metabolic process (GO:0046486)	44265	0.102464	0.368391	0	0	3.23573	7.3718	DGKG;PLA2G15;DGKZ	.
	actin filament capping (GO:0051693)	44265	0.102464	0.368391	0	0	3.23573	7.3718	GSN;CAPZB;TWF2	.
	ectoderm development (GO:0007398)	44265	0.102464	0.368391	0	0	3.23573	7.3718	SMURF1;ZBTB7B;STX2	.
	stress fiber assembly (GO:0043149)	44265	0.102464	0.368391	0	0	3.23573	7.3718	SRC;ZYX;RHOA	.
	negative regulation of protein autophosphorylation (GO:0031953)	44265	0.102464	0.368391	0	0	3.23573	7.3718	NLRP12;MVP;CHORDC1	.
	positive regulation of interleukin-13 production (GO:0032736)	44265	0.102464	0.368391	0	0	3.23573	7.3718	RARA;LGALS9;PRKCZ	.
	negative regulation of homotypic cell-cell adhesion (GO:0034111)	44265	0.102464	0.368391	0	0	3.23573	7.3718	PRKCD;CD9;ALOX12	.
	negative regulation of endoplasmic reticulum unfolded protein response (GO:1900102)	44265	0.102464	0.368391	0	0	3.23573	7.3718	PPP1R15A;PTPN1;DNAJB9	.
	sequestering of actin monomers (GO:0042989)	44265	0.102464	0.368391	0	0	3.23573	7.3718	GSN;TWF2;TMSB10	.
	positive regulation of nuclease activity (GO:0032075)	44265	0.102464	0.368391	0	0	3.23573	7.3718	PTPN1;HMGB2;PARP16	.
	regulation of T cell apoptotic process (GO:0070232)	44265	0.102464	0.368391	0	0	3.23573	7.3718	LGALS3;PRELID1;JAK3	.
	regulation of axon regeneration (GO:0048679)	44265	0.102464	0.368391	0	0	3.23573	7.3718	STK24;SCARF1;CERS2	.
	negative regulation of glucose transport (GO:0010829)	44265	0.102464	0.368391	0	0	3.23573	7.3718	GSK3A;IL1B;GRB10	.
	positive regulation of epidermal growth factor-activated receptor activity (GO:0045741)	44265	0.102464	0.368391	0	0	3.23573	7.3718	NCF1;TGFA;EREG	.
	regulation of B cell apoptotic process (GO:0002902)	44265	0.102464	0.368391	0	0	3.23573	7.3718	LYN;IL10;BCL6	.
	protein deglycosylation (GO:0006517)	44265	0.102464	0.368391	0	0	3.23573	7.3718	MAN2A2;NGLY1;MAN2B1	.
	regulation of coagulation (GO:0050818)	44265	0.102464	0.368391	0	0	3.23573	7.3718	PROCR;GP1BA;F2	.
	regulation of actin filament length (GO:0030832)	44265	0.102464	0.368391	0	0	3.23573	7.3718	WAS;BRK1;SSH3	.
	N-acetylneuraminate metabolic process (GO:0006054)	44265	0.102464	0.368391	0	0	3.23573	7.3718	NAGK;AMDHD2;RENBP	.
	contractile actin filament bundle assembly (GO:0030038)	44265	0.102464	0.368391	0	0	3.23573	7.3718	SRC;ZYX;RHOA	.
	aspartate family amino acid metabolic process (GO:0009066)	44265	0.102464	0.368391	0	0	3.23573	7.3718	MSRA;SMS;ASS1	.
	regulation of NLRP3 inflammasome complex assembly (GO:1900225)	44265	0.102464	0.368391	0	0	3.23573	7.3718	CD36;MEFV;TLR4	.
	long-chain fatty acid metabolic process (GO:0001676)	20363	0.103508	0.371837	0	0	1.6792	3.80861	CYP2J2;CPT1A;DAGLA;SCP2;ACSL1;PLA2G4A;ALOX12;ADTRP;ACAA1;DAGLB	.
	cellular amide metabolic process (GO:0043603)	22951	0.103836	0.372397	0	0	1.62996	3.69176	SLC5A6;PLA2G15;STAT5A;STAT5B;FUT7;PC;VNN1;VNN2;PDZD11;SMPD1;CLN8	.
	second-messenger-mediated signaling (GO:0019932)	22951	0.103836	0.372397	0	0	1.62996	3.69176	LAT2;CXCL8;DGKD;INPP5A;DDAH2;SPHK1;NMUR2;CD36;MCTP2;SELE;TPCN2	.
	macromolecular complex assembly (GO:0065003)	19/120	0.105374	0.377596	0	0	1.42248	3.20092	CARD10;HFE;DNAJB12;WAS;CAPG;IL1RAP;LAMC1;TANK;SLC7A7;PARD3;CNKSR3;CAPZA2;CAPN3;PTK2B;FAS;DMD;APBA1;SKAP2;PICALM	.
	histone modification (GO:0016570)	16/98	0.105525	0.377824	0	0	1.47512	3.31727	HDAC4;HDAC5;KDM4A;ENY2;UBE2B;EYA3;TAF10;HDAC11;PRKCD;AURKC;PADI3;KAT8;PADI4;TBL1X;ATXN7L3;NEK11	.
	NAD biosynthetic process (GO:0009435)	44338	0.106171	0.377943	0	0	2.22124	4.9816	PNP;NMNAT1;NAPRT;PARP16;NADSYN1	.
	sulfur amino acid metabolic process (GO:0000096)	44338	0.106171	0.377943	0	0	2.22124	4.9816	MSRA;AHCY;CTH;SMS;CDO1	.
	negative regulation of myeloid cell differentiation (GO:0045638)	44338	0.106171	0.377943	0	0	2.22124	4.9816	ZFP36;MEIS1;MAFB;CDK6;PTK2B	.
	negative regulation of actin filament polymerization (GO:0030837)	44338	0.106171	0.377943	0	0	2.22124	4.9816	GSN;PRKCD;TWF2;HIP1R;TMSB10	.
	positive regulation of phosphatase activity (GO:0010922)	44338	0.106171	0.377943	0	0	2.22124	4.9816	PPP1R15A;PTPA;CD300A;PLEK;CALM2	.
	regulation of natural killer cell mediated cytotoxicity (GO:0042269)	44338	0.106171	0.377943	0	0	2.22124	4.9816	CADM1;LAMP1;SLAMF6;LGALS9;NECTIN2	.
	protein homotrimerization (GO:0070207)	44338	0.106171	0.377943	0	0	2.22124	4.9816	ALOX5AP;MGST1;BRK1;EMILIN1;TANK	.
	positive regulation of cellular protein metabolic process (GO:0032270)	15/91	0.107525	0.378832	0	0	1.49197	3.32715	HSP90AA1;PLK1;SAMD4A;NR1H3;KLF4;THBS1;NFKBIA;FXR2;ASPH;BCL3;CAPN3;FADD;VIM;BTRC;ATG7	.
	negative regulation of kinase activity (GO:0033673)	15/91	0.107525	0.378832	0	0	1.49197	3.32715	CISH;BGN;PRKAG2;PPP2R5A;GP1BA;THY1;NYX;PPM1F;PREX1;SPRED1;DEPTOR;CHORDC1;SFN;TRIB1;SOCS6	.
	membrane protein proteolysis (GO:0033619)	12966	0.107579	0.378832	0	0	1.8885	4.21046	RET;APH1A;HM13;CTSH;MYH9;PSEN1;SPPL3	.
	neural crest cell development (GO:0014032)	12966	0.107579	0.378832	0	0	1.8885	4.21046	SEMA4A;SEMA7A;SEMA3C;SEMA4D;PEF1;NRG1;TAPT1	.
	lipid phosphorylation (GO:0046834)	12966	0.107579	0.378832	0	0	1.8885	4.21046	DGKG;DGKD;PI4KA;PIK3CD;ZFYVE21;DGKZ;PI4K2A	.
	endothelial cell migration (GO:0043542)	12966	0.107579	0.378832	0	0	1.8885	4.21046	S100A2;TNFSF12;PXN;ID1;RAB13;MYH9;RHOA	.
	apical junction assembly (GO:0043297)	12966	0.107579	0.378832	0	0	1.8885	4.21046	RAMP2;WDR1;PARD3;RAB13;CTNNA1;F11R;RHOA	.
	regulation of organelle organization (GO:0033043)	18/113	0.107909	0.378832	0	0	1.43259	3.18963	SCARB2;TBC1D9B;TBC1D8;TBC1D9;TBC1D2;PINK1;TMEM33;CAPN2;TBC1D14;STX5;MAPK1;TBC1D12;TBC1D22A;S100A9;S100A8;MARK2;ARHGEF5;TBC1D10B	.
	Notch receptor processing (GO:0007220)	44302	0.108263	0.378832	0	0	2.51704	5.59588	APH1A;NOTCH3;GALNT11;PSEN1	.
	sialylation (GO:0097503)	44302	0.108263	0.378832	0	0	2.51704	5.59588	ST3GAL4;ST6GALNAC4;ST3GAL3;ST6GALNAC6	.
	positive regulation of dendrite morphogenesis (GO:0050775)	44302	0.108263	0.378832	0	0	2.51704	5.59588	FBXW8;CUX1;SS18L1;OBSL1	.
	hexose transport (GO:0008645)	44302	0.108263	0.378832	0	0	2.51704	5.59588	SLC2A9;SLC2A13;SLC2A6;SLC2A8	.
	neuron apoptotic process (GO:0051402)	44302	0.108263	0.378832	0	0	2.51704	5.59588	BNIP3;SIAH1;NLRP1;GAPDH	.
	detection of visible light (GO:0009584)	44302	0.108263	0.378832	0	0	2.51704	5.59588	GNA11;CACNA2D4;GNAT1;MAPRE2	.
	endoplasmic reticulum to cytosol transport (GO:1903513)	44302	0.108263	0.378832	0	0	2.51704	5.59588	OS9;TMEM129;DERL2;HERPUD1	.
	positive regulation of response to endoplasmic reticulum stress (GO:1905898)	44302	0.108263	0.378832	0	0	2.51704	5.59588	PPP1R15A;TMEM259;DDIT3;FCGR2B	.
	programmed necrotic cell death (GO:0097300)	44302	0.108263	0.378832	0	0	2.51704	5.59588	LY96;RIPK1;CD14;TLR4	.
	regulation of actin nucleation (GO:0051125)	44302	0.108263	0.378832	0	0	2.51704	5.59588	ARF1;GSN;WAS;CORO1A	.
	phosphatidylinositol acyl-chain remodeling (GO:0036149)	44302	0.108263	0.378832	0	0	2.51704	5.59588	PLA2G4F;MBOAT7;PLA2G4A;PLBD1	.
	hyaluronan catabolic process (GO:0030214)	44302	0.108263	0.378832	0	0	2.51704	5.59588	CEMIP;HYAL1;CHORDC1;CD44	.
	regulation of reactive oxygen species biosynthetic process (GO:1903426)	44302	0.108263	0.378832	0	0	2.51704	5.59588	CYBA;CD36;SLC25A33;TLR4	.
	positive regulation of mitochondrion organization (GO:0010822)	20/128	0.109139	0.381589	0	0	1.40034	3.10194	OSCP1;GSK3A;BIK;BNIP3;UBE2D3;PLAUR;HIP1R;NRG1;HNMT;MMP9;UBE2L3;BBC3;PYCARD;CYB5R1;UBL5;PINK1;SLC17A9;CTSK;ITGAX;ARIH2	.
	axon guidance (GO:0007411)	24/158	0.10932	0.381913	0	0	1.35469	2.99856	VASP;RET;SEMA3C;SRC;SIAH1;PTPRO;PIK3CD;VLDLR;GAB2;SPTB;RAP1GAP;EFNB1;MAPK7;OPHN1;DOK6;GPC1;GRB10;PLXNA2;PLXNB3;PLXNB2;MAPK1;GRB2;SLIT3;CDK5R1	.
	cellular response to retinoic acid (GO:0071300)	15554	0.11117	0.388062	0	0	1.77756	3.90477	RET;LYN;RARG;FZD4;TESC;TWF2;RARA;PTK2B	.
	small GTPase mediated signal transduction (GO:0007264)	16/99	0.1129	0.393783	0	0	1.45727	3.17866	JUN;CDKN1A;RGS19;PLK2;TNK2;MAPK14;CRKL;SHTN1;ARHGAP30;MAPKAPK3;CHORDC1;MAPKAPK2;CNKSR3;RAB18;GRB2;RGL1	.
	carbohydrate homeostasis (GO:0033500)	23316	0.113209	0.393904	0	0	1.59852	3.48242	TCF7L2;STK11;INSR;STAT3;PDK4;FFAR2;PPARG;ADIPOR1;SLC8B1;USF1;PTPN2	.
	negative regulation of dephosphorylation (GO:0035305)	23316	0.113209	0.393904	0	0	1.59852	3.48242	TSKS;PPP1R15A;PTPA;PPP1R26;SPRED1;CSRNP3;ELL;FKBP15;PPP1R11;CHORDC1;ZFYVE1	.
	negative regulation of protein modification process (GO:0031400)	23316	0.113209	0.393904	0	0	1.59852	3.48242	PPP1R15A;PTPA;LYN;G6PD;PPP1R11;CHORDC1;PAQR3;PRR5L;DMD;XDH;SNTA1	.
	positive regulation of cellular biosynthetic process (GO:0031328)	24/159	0.115168	0.400056	0	0	1.34457	2.90611	SCARB1;HSP90AA1;INSR;SAMD4A;NR1H3;PKD2;GLI1;KLF4;CLU;AREG;THBS1;ASS1;EREG;FXR2;P2RX4;DDAH2;IL1B;BCL3;CD36;VIM;TLR4;LDLR;PTPN2;CD244	.
	regulation of striated muscle contraction (GO:0006942)	44376	0.115625	0.400056	0	0	1.97032	4.25077	GRK2;P2RX4;MYBPH;DMD;SRI;CALM2	.
	negative regulation of Notch signaling pathway (GO:0045746)	44376	0.115625	0.400056	0	0	1.97032	4.25077	LFNG;NOTCH3;ARRDC1;UBC;NEURL1;WWP2	.
	negative regulation of lymphocyte proliferation (GO:0050672)	44376	0.115625	0.400056	0	0	1.97032	4.25077	LYN;IL10;CEBPB;SDC4;CD300A;FCGR2B	.
	negative regulation of epithelial cell apoptotic process (GO:1904036)	44376	0.115625	0.400056	0	0	1.97032	4.25077	TCF7L2;RAMP2;MAPK7;TNIP2;SERPINE1;NFE2L2	.
	amino acid transmembrane transport (GO:0003333)	44376	0.115625	0.400056	0	0	1.97032	4.25077	SLC6A6;SLC7A7;SLC7A8;SLC38A7;SLC38A6;SLC3A2	.
	regulation of myoblast differentiation (GO:0045661)	44376	0.115625	0.400056	0	0	1.97032	4.25077	NOTCH1;BTG1;FLOT2;ANKRD2;MAPK14;PLCB1	.
	protein polyubiquitination (GO:0000209)	40/283	0.119127	0.411842	0	0	1.24591	2.65075	PELI2;UBE2D3;UBE2D1;RNF19B;TANK;RNF5;UBE2L3;FBXO40;PSMD6;UBE2Q2;RNF217;TMEM129;UBC;ARIH2;LONRF3;BTRC;LONRF1;FBXO9;WSB1;FBXW5;PPIL2;FBXW8;UBE2B;RNF24;SMURF1;SIAH1;UBE2G1;WWP2;DDB2;FBXL12;RNF144B;PSMA6;RNF167;UBE2W;HECW2;TTC3;MKRN1;RBCK1;FBXL5;RNF122	.
	regulation of blood circulation (GO:1903522)	13332	0.120789	0.416254	0	0	1.82327	3.85387	CYP2J2;ACE2;ACE;S100A1;TPM1;ECE1;SRI	.
	cardiac muscle contraction (GO:0060048)	13332	0.120789	0.416254	0	0	1.82327	3.85387	GRK2;GAA;TPM1;TNNI2;DMD;SLC8A1;SCN2B	.
	negative regulation of blood coagulation (GO:0030195)	13332	0.120789	0.416254	0	0	1.82327	3.85387	PLAU;SERPINE1;PLAUR;GP1BA;ADTRP;TFPI;F2	.
	glutamate receptor signaling pathway (GO:0007215)	13332	0.120789	0.416254	0	0	1.82327	3.85387	DAGLA;PTK2B;HOMER3;PLCB1;DAGLB;CPEB4;CDK5R1	.
	actomyosin structure organization (GO:0031032)	26268	0.121553	0.41822	0	0	1.53699	3.23907	WDR1;SRC;TPM1;EPB41L3;MYBPH;ZYX;CAPN3;MYH9;CDC42BPB;F11R;OBSL1;RHOA	.
	positive regulation of growth (GO:0045927)	26268	0.121553	0.41822	0	0	1.53699	3.23907	SDCBP;HYAL1;SPHK1;INSR;RPS6KA1;DERL2;PLCB1;S100A9;SLC25A33;S100A8;PPM1F;CXCL16	.
	regulation of proteolysis involved in cellular protein catabolic process (GO:1903050)	44339	0.123263	0.42004	0	0	2.09772	4.39145	PINK1;GPX1;GBA;PTK2B;CTSC	.
	lamellipodium assembly (GO:0030032)	44339	0.123263	0.42004	0	0	2.09772	4.39145	CARMIL1;PTPRO;PARVB;RAC1;SRGAP2	.
	vitamin transport (GO:0051180)	44339	0.123263	0.42004	0	0	2.09772	4.39145	SLC5A6;SCARB1;TCN2;FOLR3;FOLR2	.
	positive regulation of ATP metabolic process (GO:1903580)	44339	0.123263	0.42004	0	0	2.09772	4.39145	PFKFB4;PINK1;PFKFB3;INSR;ENO1	.
	positive regulation of monooxygenase activity (GO:0032770)	44339	0.123263	0.42004	0	0	2.09772	4.39145	SCARB1;POR;GCH1;S100A1;IL1B	.
	positive regulation of cell junction assembly (GO:1901890)	44339	0.123263	0.42004	0	0	2.09772	4.39145	ACE2;FLOT1;THY1;RAC1;PPM1F	.
	NAD metabolic process (GO:0019674)	44339	0.123263	0.42004	0	0	2.09772	4.39145	BST1;NMNAT1;NAPRT;NADSYN1;NADK	.
	regulation of axon extension involved in axon guidance (GO:0048841)	44339	0.123263	0.42004	0	0	2.09772	4.39145	SEMA4A;SEMA7A;SEMA4D;SEMA3C;PLXNA2	.
	cholesterol efflux (GO:0033344)	44339	0.123263	0.42004	0	0	2.09772	4.39145	SCARB1;NPC1;SOAT1;NPC2;ABCA7	.
	glutamine family amino acid metabolic process (GO:0009064)	44339	0.123263	0.42004	0	0	2.09772	4.39145	DDAH2;ACOD1;NAGS;GGT1;PRODH	.
	regulation of B cell proliferation (GO:0030888)	15919	0.123347	0.42004	0	0	1.72668	3.61352	LYN;IL10;BST1;CD300A;IL7;FCGR2B;TIRAP;TNFSF13B	.
	response to hydrogen peroxide (GO:0042542)	15919	0.123347	0.42004	0	0	1.72668	3.61352	MAPK7;GPX1;STK24;DLC1;PRKCD;HMOX1;MAPK13;NFE2L2	.
	negative regulation of ERBB signaling pathway (GO:1901185)	15919	0.123347	0.42004	0	0	1.72668	3.61352	HGS;UBC;NRG1;SPRY1;GRB2;PTPN2;EREG;LGMN	.
	positive regulation of JUN kinase activity (GO:0043507)	18507	0.124237	0.422738	0	0	1.65839	3.45868	MAP2K4;PAK1;DBNL;MAP3K20;RIPK1;MAP3K6;TANK;ARHGEF5;MAP3K11	.
	regulation of protein phosphorylation (GO:0001932)	37/261	0.125732	0.426247	0	0	1.24995	2.59191	CSF1R;RALB;FLT4;ITGB3;PELI2;ITGB2;PRR5L;PAK1;CCND3;SPRED1;CHORDC1;SESN2;FLOT1;RIPK1;RAC1;XDH;LYN;SEMA4D;INSR;STAT2;AKTIP;PAQR3;FN1;PLAUR;F2;MMP9;FGR;MARCO;BST1;PINK1;IL1B;FAS;PLXNB2;FAM20A;WDFY2;CD24;CARD14	.
	regulation of cell cycle (GO:0051726)	31/215	0.128875	0.426247	0	0	1.27453	2.61139	INTS13;CITED2;SRC;ADARB1;STK3;TGM1;SDCBP;PAK1;MAEA;PIM1;JUNB;SRPK2;MAP3K3;MAP2K4;JUN;MAP2K2;GADD45B;GADD45A;NEK6;PLK1;STAT3;CDK11B;GADD45G;RNF167;CDK6;STK24;CCPG1;IRF1;ID1;RARA;SIPA1	.
	negative regulation of antigen receptor-mediated signaling pathway (GO:0050858)	44303	0.129096	0.426247	0	0	2.32329	4.75624	LGALS3;CD300A;THY1;PTPN2	.
	negative regulation of cell development (GO:0010721)	44303	0.129096	0.426247	0	0	2.32329	4.75624	GSK3A;NOTCH1;SORL1;LTF	.
	negative regulation of phosphoprotein phosphatase activity (GO:0032515)	44303	0.129096	0.426247	0	0	2.32329	4.75624	PPP1R15A;IKBKB;PTPA;PPP1R11	.
	regulation of protein localization to membrane (GO:1905475)	44303	0.129096	0.426247	0	0	2.32329	4.75624	VAMP8;GSN;CRIPT;VTI1B	.
	response to purine-containing compound (GO:0014074)	44303	0.129096	0.426247	0	0	2.32329	4.75624	RYR1;JUN;P2RX4;JUNB	.
	positive regulation of macrophage activation (GO:0043032)	44303	0.129096	0.426247	0	0	2.32329	4.75624	TNIP2;LBP;THBS1;TLR4	.
	positive regulation of natural killer cell mediated immunity (GO:0002717)	44303	0.129096	0.426247	0	0	2.32329	4.75624	CADM1;LAMP1;SLAMF6;NECTIN2	.
	positive regulation of nitrogen compound metabolic process (GO:0051173)	44303	0.129096	0.426247	0	0	2.32329	4.75624	MAPK7;PAX8;GBA;KLF4	.
	negative regulation of ryanodine-sensitive calcium-release channel activity (GO:0060315)	44266	0.129118	0.426247	0	0	2.83111	5.79536	SRI;PKD2;CALM2	.
	immune response-regulating cell surface receptor signaling pathway (GO:0002768)	44266	0.129118	0.426247	0	0	2.83111	5.79536	FGR;LYN;CD24	.
	negative regulation of leukocyte cell-cell adhesion (GO:1903038)	44266	0.129118	0.426247	0	0	2.83111	5.79536	TNFAIP8L2;JAK3;ASS1	.
	positive regulation of cytolysis (GO:0045919)	44266	0.129118	0.426247	0	0	2.83111	5.79536	PGLYRP4;LBP;PGLYRP1	.
	modulation by host of viral process (GO:0044788)	44266	0.129118	0.426247	0	0	2.83111	5.79536	PC;CFL1;LTF	.
	biotin metabolic process (GO:0006768)	44266	0.129118	0.426247	0	0	2.83111	5.79536	SLC5A6;PC;PDZD11	.
	positive regulation of transcription from RNA polymerase II promoter in response to endoplasmic reticulum stress (GO:1990440)	44266	0.129118	0.426247	0	0	2.83111	5.79536	CEBPB;DDIT3;ATF3	.
	organic cyclic compound catabolic process (GO:1901361)	44266	0.129118	0.426247	0	0	2.83111	5.79536	CYP3A4;PRODH;ACAA1	.
	negative regulation of myotube differentiation (GO:0010832)	44266	0.129118	0.426247	0	0	2.83111	5.79536	HDAC4;HDAC5;NOTCH1	.
	positive regulation of actin filament depolymerization (GO:0030836)	44266	0.129118	0.426247	0	0	2.83111	5.79536	CARMIL1;WDR1;PLEK	.
	sphingolipid catabolic process (GO:0030149)	44266	0.129118	0.426247	0	0	2.83111	5.79536	SMPD1;SPHK1;PPT1	.
	positive regulation of glycoprotein biosynthetic process (GO:0010560)	44266	0.129118	0.426247	0	0	2.83111	5.79536	SOAT1;CHORDC1;PLCB1	.
	transcytosis (GO:0045056)	44266	0.129118	0.426247	0	0	2.83111	5.79536	LRPAP1;LRP1;PICALM	.
	negative regulation of protein localization to cell surface (GO:2000009)	44266	0.129118	0.426247	0	0	2.83111	5.79536	TAX1BP3;SNX33;PICALM	.
	methionine metabolic process (GO:0006555)	44266	0.129118	0.426247	0	0	2.83111	5.79536	MSRA;AHCY;SMS	.
	fatty acid transmembrane transport (GO:1902001)	44266	0.129118	0.426247	0	0	2.83111	5.79536	CPT1A;PRKAG2;SLC25A20	.
	heart process (GO:0003015)	44266	0.129118	0.426247	0	0	2.83111	5.79536	GPX1;RAMP3;ACE	.
	negative regulation of cardiac muscle hypertrophy (GO:0010614)	44266	0.129118	0.426247	0	0	2.83111	5.79536	GSK3A;RGS2;P2RX4	.
	angiotensin maturation (GO:0002003)	44266	0.129118	0.426247	0	0	2.83111	5.79536	ACE2;ACE;CTSZ	.
	negative regulation of chemotaxis (GO:0050922)	44266	0.129118	0.426247	0	0	2.83111	5.79536	NOTCH1;THBS1;PTPN2	.
	inhibition of cysteine-type endopeptidase activity involved in apoptotic process (GO:1990001)	44266	0.129118	0.426247	0	0	2.83111	5.79536	NLRC4;NOL3;NAIP	.
	negative regulation of release of sequestered calcium ion into cytosol (GO:0051280)	44266	0.129118	0.426247	0	0	2.83111	5.79536	SRI;PKD2;CALM2	.
	protein O-linked mannosylation (GO:0035269)	44266	0.129118	0.426247	0	0	2.83111	5.79536	DPM2;DPM3;LARGE1	.
	carbohydrate derivative catabolic process (GO:1901136)	44266	0.129118	0.426247	0	0	2.83111	5.79536	NGLY1;NAGA;DERA	.
	urate metabolic process (GO:0046415)	44266	0.129118	0.426247	0	0	2.83111	5.79536	SLC2A9;CARMIL1;PNP	.
	cellular response to prostaglandin stimulus (GO:0071379)	44266	0.129118	0.426247	0	0	2.83111	5.79536	PTGER4;GNG2;ADCY6	.
	carnitine metabolic process (GO:0009437)	44266	0.129118	0.426247	0	0	2.83111	5.79536	CPT1A;CRAT;ALDH9A1	.
	regulation of lamellipodium morphogenesis (GO:2000392)	44266	0.129118	0.426247	0	0	2.83111	5.79536	SRC;ENPP2;CD44	.
	carnitine shuttle (GO:0006853)	44266	0.129118	0.426247	0	0	2.83111	5.79536	CPT1A;PRKAG2;SLC25A20	.
	activation of JUN kinase activity (GO:0007257)	44377	0.131015	0.43119	0	0	1.88812	3.83749	MAP2K4;DBNL;MAP3K20;RIPK1;MAP3K6;MAP3K11	.
	regulation of cell adhesion mediated by integrin (GO:0033628)	44377	0.131015	0.43119	0	0	1.88812	3.83749	RET;LYN;PLAU;TESC;SERPINE1;FERMT3	.
	aminoglycan metabolic process (GO:0006022)	44377	0.131015	0.43119	0	0	1.88812	3.83749	VCAN;SDC4;GPC1;SDC3;GPC3;BGN	.
	acylglycerol catabolic process (GO:0046464)	44377	0.131015	0.43119	0	0	1.88812	3.83749	ABHD12;DAGLA;FABP6;LPL;DAGLB;PNPLA2	.
	regulation of epithelial cell proliferation (GO:0050678)	26634	0.131206	0.431492	0	0	1.51129	3.06941	ACVRL1;ZFP36;CDKN2B;GPX1;CDK6;HYAL1;DEAF1;C5AR1;TGFA;LAMC1;NOD2;EREG	.
	regulation of angiogenesis (GO:0045765)	26/177	0.131894	0.433423	0	0	1.30221	2.63797	ECM1;RAMP2;CXCL8;BTG1;HSPB6;SERPINE1;FOXO4;THBS2;THBS1;SPRED1;HYAL1;STAB1;PGK1;PROK2;HMOX1;CTSH;HTATIP2;ANXA3;TNFSF12;SPHK1;KLF4;SYNJ2BP;HGS;IL1B;CHI3L1;PPARG	.
	organic anion transport (GO:0015711)	19/124	0.133279	0.436861	0	0	1.36798	2.7569	SCARB1;PRELID1;SLC35C2;PITPNA;SLC25A16;CYB5R1;SLC6A6;SLC25A17;SCP2;SLCO4A1;NPC2;SLC25A19;SLCO1B3;CA4;SLCO4C1;SLC26A8;LDLR;SLC26A6;SLC25A24	.
	glycolipid metabolic process (GO:0006664)	24047	0.133345	0.436861	0	0	1.53914	3.10109	SMPD1;GBA;PSAP;NEU1;ST3GAL4;NAGA;ARSG;ST6GALNAC4;ABO;ARSB;ST6GALNAC6	.
	positive regulation of protein modification by small protein conjugation or removal (GO:1903322)	24047	0.133345	0.436861	0	0	1.53914	3.10109	HDAC4;RASD2;GSK3A;PINK1;TNIP1;SPHK1;TBC1D7;UBE2D1;SENP2;TANK;UBE2L3	.
	negative regulation of blood vessel morphogenesis (GO:2000181)	24047	0.133345	0.436861	0	0	1.53914	3.10109	SPRED1;HGS;STAB1;PGK1;PPARG;FOXO4;THBS2;KLF4;SYNJ2BP;THBS1;XDH	.
	phospholipid transport (GO:0015914)	21459	0.135048	0.44177	0	0	1.57398	3.15132	SCARB1;PRELID1;ATP8B4;ATP8A2;SCP2;NPC2;PITPNA;ABCA7;LDLR;ATP9A	.
	regulation of epidermal growth factor receptor signaling pathway (GO:0042058)	21459	0.135048	0.44177	0	0	1.57398	3.15132	HIP1;HGS;UBC;PLAUR;HIP1R;SPRY1;GRB2;ARAP1;MMP9;PTPN2	.
	peptidyl-serine modification (GO:0018209)	25/170	0.136095	0.443493	0	0	1.30382	2.60035	GALNT11;PRKCZ;CAMKK1;IKBKB;STK11;GRK2;MKNK1;PDK3;STK38L;MAPK1;NEK6;PLK2;PRKCD;PLK1;LMTK2;CSNK1E;MAPK14;MAPK13;PINK1;MAPKAPK3;MAPKAPK2;GALNTL5;ULK1;SGK1;CDK5R1	.
	negative regulation of neuron projection development (GO:0010977)	18872	0.136104	0.443493	0	0	1.61881	3.22845	GDI1;PTPRO;PAQR3;OMG;PTPN9;DENND5A;THY1;RHOA;ADCY6	.
	coenzyme metabolic process (GO:0006732)	18872	0.136104	0.443493	0	0	1.61881	3.22845	SLC5A6;SLC25A16;ACOT7;VNN1;VNN2;PDZD11;GPAT4;MOCOS;ACSL6	.
	unsaturated fatty acid metabolic process (GO:0033559)	16285	0.136191	0.443493	0	0	1.67862	3.34666	CYP2J2;DAGLA;SCP2;ACSL1;PLA2G4A;ALOX12;ACAA1;DAGLB	.
	negative regulation of type I interferon production (GO:0032480)	16285	0.136191	0.443493	0	0	1.67862	3.34666	PYCARD;NLRX1;UBC;NLRC5;ACOD1;UBE2L6;GPATCH3;LILRA4	.
	regulation of focal adhesion assembly (GO:0051893)	16285	0.136191	0.443493	0	0	1.67862	3.34666	ACVRL1;SRC;DLC1;THY1;RAC1;THBS1;PPM1F;RHOA	.
	protein localization to cell periphery (GO:1990778)	18/117	0.137218	0.446305	0	0	1.3744	2.72981	RAMP2;RAMP3;PPIL2;SMURF1;TESC;ATP1B3;F11R;RAB11A;TNFRSF1A;GOLGA7B;IKBKB;EHD2;TMEM88;PDZD11;EPB41L3;RAB13;FLOT1;FLOT2	.
	positive regulation of ERK1 and ERK2 cascade (GO:0070374)	29/201	0.137261	0.446305	0	0	1.27525	2.53249	RET;CCL14;CSF1R;SEMA7A;RAMP3;NOTCH1;FLT3;FLT4;C5AR1;NOD2;PRKCZ;PYCARD;GLIPR2;PTK2B;LGALS9;CD36;CCL16;CCR1;ATP6AP1;INSR;LMTK2;ABCA7;MERTK;TIRAP;MARCO;CHI3L1;ROR2;RAF1;CD44	.
	regulation of hydrolase activity (GO:0051336)	13/80	0.138231	0.44912	0	0	1.46623	2.90141	OCRL;ADAP1;VAV1;RAP1GAP;FGD1;FGD3;FGD6;CHN2;PLXNA2;PLXNB3;PLXNB2;ARHGEF5;TBC1D10B	.
	positive regulation of proteasomal protein catabolic process (GO:1901800)	26999	0.141269	0.452072	0	0	1.48643	2.90908	RNF144B;GSK3A;TMEM259;RNF217;PLK1;ARIH2;RNF19B;LONRF3;CSNK1E;TRIB1;LONRF1;CLU	.
	regulation of chemotaxis (GO:0050920)	44340	0.141534	0.452072	0	0	1.9872	3.88541	STX4;STX3;THBS1;PPM1F;PTPN2	.
	negative regulation of endothelial cell apoptotic process (GO:2000352)	44340	0.141534	0.452072	0	0	1.9872	3.88541	RAMP2;MAPK7;TNIP2;SERPINE1;NFE2L2	.
	protein alpha-1,2-demannosylation (GO:0036508)	44340	0.141534	0.452072	0	0	1.9872	3.88541	OS9;EDEM2;UBC;DERL2;RNF5	.
	regulation of cellular senescence (GO:2000772)	44340	0.141534	0.452072	0	0	1.9872	3.88541	MAP3K3;ARG2;CDK6;NEK6;YPEL3	.
	positive regulation of neutrophil chemotaxis (GO:0090023)	44340	0.141534	0.452072	0	0	1.9872	3.88541	CXCL8;PPBP;RAC1;TIRAP;CXCL5	.
	regulation of actin filament bundle assembly (GO:0032231)	44340	0.141534	0.452072	0	0	1.9872	3.88541	PTGER4;FHOD1;PLEK;WAS;RAC1	.
	cell morphogenesis (GO:0000902)	21824	0.146576	0.452072	0	0	1.54178	2.96053	CAP1;TENM1;CAPZB;CDH20;VDR;PTPRO;RHOG;RAC1;FRY;CLU	.
	glycerophospholipid biosynthetic process (GO:0046474)	24/164	0.147253	0.452072	0	0	1.29618	2.48298	ARF3;ARF1;MTMR3;AGK;PIK3CD;PLA2G4A;OCRL;ABHD5;BMX;PIK3R5;PGS1;PHOSPHO1;GPAT4;INPP5D;LPCAT2;PI4KA;PIP5K1B;GPAT3;PIP5K1C;CDIPT;LPIN2;PI4K2A;LPIN3;CDS2	.
	positive regulation of ubiquitin-protein transferase activity (GO:0051443)	11475	0.147323	0.452072	0	0	1.81249	3.47115	ARRDC4;RAB1A;PINK1;PLK1;ARRDC3;UBE2L3	.
	regulation of ubiquitin-protein transferase activity (GO:0051438)	11475	0.147323	0.452072	0	0	1.81249	3.47115	ARRDC4;PINK1;ZER1;PLK1;ARRDC3;UBE2L3	.
	alpha-amino acid metabolic process (GO:1901605)	11475	0.147323	0.452072	0	0	1.81249	3.47115	STAT5A;STAT5B;GATM;DDAH2;CKB;ASS1	.
	protein destabilization (GO:0031648)	11475	0.147323	0.452072	0	0	1.81249	3.47115	NCLN;GSN;PLK1;CTSH;BTRC;SENP2	.
	regulation of glucose import (GO:0046324)	11475	0.147323	0.452072	0	0	1.81249	3.47115	GSK3A;CAPN10;INSR;GRB10;PRKAG2;RHOQ	.
	negative regulation of cell death (GO:0060548)	13/81	0.148054	0.452072	0	0	1.44458	2.7594	BNIP3L;BECN1;LRPAP1;BNIP3;GBA;PARP16;CLU;TANK;BTBD10;SORL1;PINK1;CHMP2A;CHMP4B	.
	positive regulation of protein targeting to mitochondrion (GO:1903955)	13/81	0.148054	0.452072	0	0	1.44458	2.7594	OSCP1;GSK3A;UBE2D3;NRG1;HNMT;UBE2L3;UBL5;CYB5R1;PINK1;SLC17A9;CTSK;ITGAX;ARIH2	.
	B cell differentiation (GO:0030183)	19238	0.148535	0.452072	0	0	1.58108	3.01501	IL10;HDAC4;ADGRG3;HDAC5;FLT3;NFAM1;DNAJB9;JAK3;PTPN2	.
	regulation of DNA binding (GO:0051101)	19238	0.148535	0.452072	0	0	1.58108	3.01501	NFKBIA;JUN;ID1;BCL3;HMGB2;PLAUR;PPARG;JAK2;MMP9	.
	negative regulation of cholesterol storage (GO:0010887)	44233	0.149274	0.452072	0	0	3.77405	7.17814	NR1H3;PPARG	.
	regulation of immunoglobulin mediated immune response (GO:0002889)	44233	0.149274	0.452072	0	0	3.77405	7.17814	IL10;NECTIN2	.
	neuron projection maintenance (GO:1990535)	44233	0.149274	0.452072	0	0	3.77405	7.17814	INSR;PSEN1	.
	amylin receptor signaling pathway (GO:0097647)	44233	0.149274	0.452072	0	0	3.77405	7.17814	RAMP2;RAMP3	.
	purine ribonucleoside bisphosphate biosynthetic process (GO:0034036)	44233	0.149274	0.452072	0	0	3.77405	7.17814	PAPSS2;PAPSS1	.
	positive regulation of T-helper 17 type immune response (GO:2000318)	44233	0.149274	0.452072	0	0	3.77405	7.17814	IL23A;IL12B	.
	positive regulation of aspartic-type peptidase activity (GO:1905247)	44233	0.149274	0.452072	0	0	3.77405	7.17814	LYN;PICALM	.
	positive regulation of icosanoid secretion (GO:0032305)	44233	0.149274	0.452072	0	0	3.77405	7.17814	P2RX4;IL1B	.
	positive regulation of ATP biosynthetic process (GO:2001171)	44233	0.149274	0.452072	0	0	3.77405	7.17814	PINK1;ENO1	.
	negative regulation of oligodendrocyte differentiation (GO:0048715)	44233	0.149274	0.452072	0	0	3.77405	7.17814	NOTCH1;DAAM2	.
	positive regulation of activin receptor signaling pathway (GO:0032927)	44233	0.149274	0.452072	0	0	3.77405	7.17814	ACVR1B;ACVR2B	.
	negative regulation of type I interferon-mediated signaling pathway (GO:0060339)	44233	0.149274	0.452072	0	0	3.77405	7.17814	NLRC5;PTPN2	.
	negative regulation of receptor biosynthetic process (GO:0010871)	44233	0.149274	0.452072	0	0	3.77405	7.17814	ITGB3;PPARG	.
	astral microtubule organization (GO:0030953)	44233	0.149274	0.452072	0	0	3.77405	7.17814	NUMA1;RAB11A	.
	positive regulation of humoral immune response (GO:0002922)	44233	0.149274	0.452072	0	0	3.77405	7.17814	ACOD1;FCGR2B	.
	vascular smooth muscle cell development (GO:0097084)	44233	0.149274	0.452072	0	0	3.77405	7.17814	RAMP2;NOTCH1	.
	iron ion import (GO:0097286)	44233	0.149274	0.452072	0	0	3.77405	7.17814	HFE;PICALM	.
	positive regulation of vesicle fusion (GO:0031340)	44233	0.149274	0.452072	0	0	3.77405	7.17814	ANXA1;ANXA2	.
	3'-phosphoadenosine 5'-phosphosulfate biosynthetic process (GO:0050428)	44233	0.149274	0.452072	0	0	3.77405	7.17814	PAPSS2;PAPSS1	.
	monoamine transport (GO:0015844)	44233	0.149274	0.452072	0	0	3.77405	7.17814	SLC6A2;SLC6A4	.
	spermine metabolic process (GO:0008215)	44233	0.149274	0.452072	0	0	3.77405	7.17814	SMS;SAT1	.
	positive regulation of memory T cell differentiation (GO:0043382)	44233	0.149274	0.452072	0	0	3.77405	7.17814	IL23A;IL12B	.
	citrulline metabolic process (GO:0000052)	44233	0.149274	0.452072	0	0	3.77405	7.17814	DDAH2;ASS1	.
	regulation of cellular response to oxidative stress (GO:1900407)	44233	0.149274	0.452072	0	0	3.77405	7.17814	PINK1;GCH1	.
	negative regulation of cell size (GO:0045792)	44233	0.149274	0.452072	0	0	3.77405	7.17814	DEPTOR;RHOA	.
	photoreceptor cell differentiation (GO:0046530)	44233	0.149274	0.452072	0	0	3.77405	7.17814	STAT3;MAPRE2	.
	signal complex assembly (GO:0007172)	44233	0.149274	0.452072	0	0	3.77405	7.17814	SRC;PXN	.
	negative regulation of cellular extravasation (GO:0002692)	44233	0.149274	0.452072	0	0	3.77405	7.17814	PTGER4;PLCB1	.
	regulation of interleukin-12 secretion (GO:2001182)	44233	0.149274	0.452072	0	0	3.77405	7.17814	LGALS9;MAPK14	.
	growth hormone secretion (GO:0030252)	44233	0.149274	0.452072	0	0	3.77405	7.17814	RAB1A;LTBP4	.
	macrophage derived foam cell differentiation (GO:0010742)	44233	0.149274	0.452072	0	0	3.77405	7.17814	SOAT1;PPARG	.
	white fat cell differentiation (GO:0050872)	44233	0.149274	0.452072	0	0	3.77405	7.17814	CTBP2;PPARG	.
	positive regulation of mitophagy in response to mitochondrial depolarization (GO:0098779)	44233	0.149274	0.452072	0	0	3.77405	7.17814	PINK1;OPTN	.
	release of sequestered calcium ion into cytosol by sarcoplasmic reticulum (GO:0014808)	44233	0.149274	0.452072	0	0	3.77405	7.17814	RYR1;NOL3	.
	regulation of cellular carbohydrate catabolic process (GO:0043471)	44233	0.149274	0.452072	0	0	3.77405	7.17814	PPP1R3B;PGAM1	.
	regulation of mitotic spindle checkpoint (GO:1903504)	44233	0.149274	0.452072	0	0	3.77405	7.17814	ANAPC15;DUSP1	.
	regulation of keratinocyte apoptotic process (GO:1902172)	44233	0.149274	0.452072	0	0	3.77405	7.17814	ZFP36;GSN	.
	positive regulation of toll-like receptor 3 signaling pathway (GO:0034141)	44233	0.149274	0.452072	0	0	3.77405	7.17814	FLOT1;TIRAP	.
	retrograde transport, vesicle recycling within Golgi (GO:0000301)	44233	0.149274	0.452072	0	0	3.77405	7.17814	SYS1;OPTN	.
	negative regulation of calcium ion-dependent exocytosis (GO:0045955)	44233	0.149274	0.452072	0	0	3.77405	7.17814	SYT4;STXBP3	.
	negative regulation of erythrocyte differentiation (GO:0045647)	44233	0.149274	0.452072	0	0	3.77405	7.17814	ZFP36;MAFB	.
	heparan sulfate proteoglycan biosynthetic process, enzymatic modification (GO:0015015)	44233	0.149274	0.452072	0	0	3.77405	7.17814	HS6ST1;HS6ST2	.
	positive regulation of activation of Janus kinase activity (GO:0010536)	44233	0.149274	0.452072	0	0	3.77405	7.17814	IL23A;IL12B	.
	regulation of T-helper 17 cell lineage commitment (GO:2000328)	44233	0.149274	0.452072	0	0	3.77405	7.17814	IL23A;IL12B	.
	positive regulation of sodium ion transmembrane transport (GO:1902307)	44233	0.149274	0.452072	0	0	3.77405	7.17814	DMD;GLRX	.
	response to catecholamine (GO:0071869)	44233	0.149274	0.452072	0	0	3.77405	7.17814	GNG2;ADCY6	.
	endosome to lysosome transport via multivesicular body sorting pathway (GO:0032510)	44233	0.149274	0.452072	0	0	3.77405	7.17814	CHMP3;UBXN6	.
	positive regulation of oxidative stress-induced cell death (GO:1903209)	44233	0.149274	0.452072	0	0	3.77405	7.17814	RIPK1;TLR4	.
	positive regulation of intracellular estrogen receptor signaling pathway (GO:0033148)	44233	0.149274	0.452072	0	0	3.77405	7.17814	PAK1;WBP2	.
	regulation of extracellular exosome assembly (GO:1903551)	44233	0.149274	0.452072	0	0	3.77405	7.17814	SDCBP;SDC4	.
	astrocyte differentiation (GO:0048708)	44233	0.149274	0.452072	0	0	3.77405	7.17814	CDK6;STAT3	.
	negative regulation of myeloid cell apoptotic process (GO:0033033)	44233	0.149274	0.452072	0	0	3.77405	7.17814	MAEA;NOD2	.
	negative regulation of glial cell proliferation (GO:0060253)	44233	0.149274	0.452072	0	0	3.77405	7.17814	RNF10;NOTCH1	.
	long term synaptic depression (GO:0060292)	44233	0.149274	0.452072	0	0	3.77405	7.17814	ARF1;PLK2	.
	astrocyte activation (GO:0048143)	44233	0.149274	0.452072	0	0	3.77405	7.17814	LRP1;PSEN1	.
	regulation of interleukin-13 secretion (GO:2000665)	44233	0.149274	0.452072	0	0	3.77405	7.17814	LGALS9;PRKCZ	.
	L-amino acid import (GO:0043092)	44233	0.149274	0.452072	0	0	3.77405	7.17814	SLC1A1;SLC3A2	.
	amine metabolic process (GO:0009308)	44233	0.149274	0.452072	0	0	3.77405	7.17814	SULT1A1;AOC3	.
	neutrophil extravasation (GO:0072672)	44233	0.149274	0.452072	0	0	3.77405	7.17814	JAML;PIK3CD	.
	positive regulation of fibroblast apoptotic process (GO:2000271)	44233	0.149274	0.452072	0	0	3.77405	7.17814	BTG1;STK17A	.
	regulation of osteoclast development (GO:2001204)	44233	0.149274	0.452072	0	0	3.77405	7.17814	ATP6AP1;LTF	.
	foam cell differentiation (GO:0090077)	44233	0.149274	0.452072	0	0	3.77405	7.17814	SOAT1;PPARG	.
	positive regulation of aspartic-type endopeptidase activity involved in amyloid precursor protein catabolic process (GO:1902961)	44233	0.149274	0.452072	0	0	3.77405	7.17814	LYN;PICALM	.
	neuron remodeling (GO:0016322)	44233	0.149274	0.452072	0	0	3.77405	7.17814	ANKS1A;SCARF1	.
	pyrimidine-containing compound biosynthetic process (GO:0072528)	44233	0.149274	0.452072	0	0	3.77405	7.17814	CDA;ACOD1	.
	positive regulation of interferon-gamma secretion (GO:1902715)	44233	0.149274	0.452072	0	0	3.77405	7.17814	LGALS9;CD244	.
	positive regulation of adaptive immune response (GO:0002821)	44233	0.149274	0.452072	0	0	3.77405	7.17814	PYCARD;FADD	.
	negative regulation of mRNA catabolic process (GO:1902373)	44233	0.149274	0.452072	0	0	3.77405	7.17814	NBAS;DHX34	.
	protein localization to nuclear envelope (GO:0090435)	44233	0.149274	0.452072	0	0	3.77405	7.17814	INTS13;PLK1	.
	regulation of protein depolymerization (GO:1901879)	44233	0.149274	0.452072	0	0	3.77405	7.17814	WDR1;MAP1B	.
	dopamine catabolic process (GO:0042420)	44233	0.149274	0.452072	0	0	3.77405	7.17814	MOXD1;MAOA	.
	regulation of superoxide metabolic process (GO:0090322)	44233	0.149274	0.452072	0	0	3.77405	7.17814	BST1;GCH1	.
	aldehyde catabolic process (GO:0046185)	44233	0.149274	0.452072	0	0	3.77405	7.17814	ALDH3B1;HOGA1	.
	snRNA modification (GO:0040031)	44233	0.149274	0.452072	0	0	3.77405	7.17814	MRPL1;NOP10	.
	cellular response to monoamine stimulus (GO:0071868)	44233	0.149274	0.452072	0	0	3.77405	7.17814	GNG2;ADCY6	.
	regulation of adiponectin secretion (GO:0070163)	44233	0.149274	0.452072	0	0	3.77405	7.17814	IL1B;RAB11FIP5	.
	positive regulation of extrinsic apoptotic signaling pathway via death domain receptors (GO:1902043)	44233	0.149274	0.452072	0	0	3.77405	7.17814	THBS1;ATF3	.
	regulation of skeletal muscle contraction (GO:0014819)	44233	0.149274	0.452072	0	0	3.77405	7.17814	DMD;KCNJ2	.
	positive regulation of hydrolase activity (GO:0051345)	25/172	0.149295	0.452072	0	0	1.28594	2.44564	CCL14;HMGB2;THY1;F11R;RAP1GAP;ARHGAP21;DNAJB1;CTSH;RSU1;SRGAP2;CCL16;NDEL1;GABARAPL2;SEMA4D;TPM1;ATP1B3;ARAP1;RHOA;TBC1D2;PINK1;SNX18;TBC1D7;RGS10;CALM2;PICALM	.
	epithelial cell differentiation (GO:0030855)	15/96	0.149613	0.452601	0	0	1.39948	2.65859	KDM6B;ACADVL;RARG;CPT1A;ANXA4;GLI1;LGALS3;DHRS9;BASP1;RARA;PGK1;ALDOC;PPARG;VDAC1;CTSB	.
	hexose metabolic process (GO:0019318)	16650	0.149679	0.452601	0	0	1.63316	3.1018	MAN2A2;GAA;CHST15;MAN2B1;ALDOC;ALDOA;GALK1;PPARD	.
	glucan catabolic process (GO:0009251)	44304	0.151436	0.455045	0	0	2.15722	4.07196	MGAM;GAA;PHKA2;GYG1	.
	regulation of spindle organization (GO:0090224)	44304	0.151436	0.455045	0	0	2.15722	4.07196	PARP3;PSRC1;NUMA1;TACC3	.
	positive regulation of cyclic nucleotide biosynthetic process (GO:0030804)	44304	0.151436	0.455045	0	0	2.15722	4.07196	RAMP2;RAMP3;SCT;CALM2	.
	regulation of lipopolysaccharide-mediated signaling pathway (GO:0031664)	44304	0.151436	0.455045	0	0	2.15722	4.07196	SCARB2;TRIB1;CD55;LTF	.
	positive regulation of actin cytoskeleton reorganization (GO:2000251)	44304	0.151436	0.455045	0	0	2.15722	4.07196	HCK;FES;HCLS1;BAIAP2	.
	glycogen biosynthetic process (GO:0005978)	44304	0.151436	0.455045	0	0	2.15722	4.07196	GYS1;UGP2;UBC;GYG1	.
	glucan biosynthetic process (GO:0009250)	44304	0.151436	0.455045	0	0	2.15722	4.07196	GYS1;UGP2;UBC;GYG1	.
	positive regulation of lipid catabolic process (GO:0050996)	44304	0.151436	0.455045	0	0	2.15722	4.07196	IL1B;PRKCD;ABHD5;PNPLA2	.
	maintenance of protein localization in organelle (GO:0072595)	44304	0.151436	0.455045	0	0	2.15722	4.07196	PINK1;BCL3;TAPT1;HK1	.
	peptidyl-threonine modification (GO:0018210)	14/89	0.153903	0.462136	0	0	1.41055	2.63975	ACVR1;GALNT11;GSK3A;PRKCD;ACOD1;LMTK2;ACVR1B;CAMKK1;STK11;GALNTL5;MAPK1;ULK1;MARK2;CDK5R1	.
	regulation of mitotic cell cycle (GO:0007346)	24/165	0.154231	0.462801	0	0	1.28692	2.40564	IL10;MAP2K4;BTG3;MAP3K3;INTS13;PARP3;MAP2K2;BTG1;NUMA1;NEK6;SPHK1;PLK1;CDK11B;STK3;SDCBP;PAK1;MAEA;PSRC1;STK24;PIM1;EIF4EBP1;TACC3;OBSL1;NEK11	.
	negative regulation of protein binding (GO:0032091)	24777	0.155278	0.464088	0	0	1.48401	2.76401	LRPAP1;RALB;HFE;CTSZ;PRKCD;TMBIM6;MITD1;CSNK1E;DISC1;SORL1;ACTB	.
	peptidyl-arginine modification (GO:0018195)	44267	0.157885	0.464088	0	0	2.5164	4.64499	NDUFAF5;PADI3;PADI4	.
	vesicle budding from membrane (GO:0006900)	44267	0.157885	0.464088	0	0	2.5164	4.64499	SNX3;ANXA2;RILP	.
	pyrimidine nucleoside salvage (GO:0043097)	44267	0.157885	0.464088	0	0	2.5164	4.64499	CDA;UPP1;DCK	.
	viral RNA genome replication (GO:0039694)	44267	0.157885	0.464088	0	0	2.5164	4.64499	ATG16L2;ATG16L1;PI4KA	.
	serine family amino acid biosynthetic process (GO:0009070)	44267	0.157885	0.464088	0	0	2.5164	4.64499	CTH;GGT1;PSPH	.
	DNA ligation involved in DNA repair (GO:0051103)	44267	0.157885	0.464088	0	0	2.5164	4.64499	POLB;PARP3;HMGB2	.
	exit from mitosis (GO:0010458)	44267	0.157885	0.464088	0	0	2.5164	4.64499	CHMP2A;CHMP4B;SIRT7	.
	regulation of cell communication by electrical coupling (GO:0010649)	44267	0.157885	0.464088	0	0	2.5164	4.64499	SRI;CALM2;SLC8A1	.
	response to prostaglandin E (GO:0034695)	44267	0.157885	0.464088	0	0	2.5164	4.64499	PTGER4;GNG2;ADCY6	.
	positive regulation of ruffle assembly (GO:1900029)	44267	0.157885	0.464088	0	0	2.5164	4.64499	PLEKHM1;DEF8;NDEL1	.
	plasminogen activation (GO:0031639)	44267	0.157885	0.464088	0	0	2.5164	4.64499	ST14;PLAU;PGK1	.
	regulation of interleukin-8 biosynthetic process (GO:0045414)	44267	0.157885	0.464088	0	0	2.5164	4.64499	BCL3;KLF4;TLR4	.
	regulation of establishment of endothelial barrier (GO:1903140)	44267	0.157885	0.464088	0	0	2.5164	4.64499	IKBKB;IL1B;TNFRSF1A	.
	positive regulation of pseudopodium assembly (GO:0031274)	44267	0.157885	0.464088	0	0	2.5164	4.64499	CDC42EP4;CDC42EP3;WASHC1	.
	regulation of pseudopodium assembly (GO:0031272)	44267	0.157885	0.464088	0	0	2.5164	4.64499	CDC42EP4;CDC42EP3;WASHC1	.
	response to interleukin-6 (GO:0070741)	44267	0.157885	0.464088	0	0	2.5164	4.64499	SBNO2;SELPLG;CHI3L1	.
	negative regulation of vascular smooth muscle cell proliferation (GO:1904706)	44267	0.157885	0.464088	0	0	2.5164	4.64499	IL10;TPM1;PPARG	.
	protein hydroxylation (GO:0018126)	44267	0.157885	0.464088	0	0	2.5164	4.64499	EGLN3;PLOD3;PLOD1	.
	regulation of blood vessel size (GO:0050880)	44267	0.157885	0.464088	0	0	2.5164	4.64499	ACE2;ACE;ADCY6	.
	regulation of hormone secretion (GO:0046883)	44267	0.157885	0.464088	0	0	2.5164	4.64499	ANXA1;OSM;FFAR2	.
	pyrimidine-containing compound salvage (GO:0008655)	44267	0.157885	0.464088	0	0	2.5164	4.64499	CDA;UPP1;DCK	.
	plasma membrane tubulation (GO:0097320)	44267	0.157885	0.464088	0	0	2.5164	4.64499	EHD2;BIN2;SNX33	.
	negative regulation of leukocyte apoptotic process (GO:2000107)	44267	0.157885	0.464088	0	0	2.5164	4.64499	HCLS1;NOD2;MERTK	.
	positive regulation of vascular endothelial growth factor receptor signaling pathway (GO:0030949)	44267	0.157885	0.464088	0	0	2.5164	4.64499	ITGB3;IL1B;GRB10	.
	regulation of retrograde protein transport, ER to cytosol (GO:1904152)	44267	0.157885	0.464088	0	0	2.5164	4.64499	OS9;EDEM2;DERL2	.
	positive regulation of interleukin-1 production (GO:0032732)	44267	0.157885	0.464088	0	0	2.5164	4.64499	ORM1;NOD2;TLR4	.
	regulation of IRE1-mediated unfolded protein response (GO:1903894)	44267	0.157885	0.464088	0	0	2.5164	4.64499	PTPN1;TMEM33;DNAJB9	.
	iron ion transport (GO:0006826)	44267	0.157885	0.464088	0	0	2.5164	4.64499	SLC25A37;SLC11A1;SLC40A1	.
	regulation of cholesterol homeostasis (GO:2000188)	44267	0.157885	0.464088	0	0	2.5164	4.64499	NPC1;VDR;NR1H3	.
	DNA damage response, signal transduction by p53 class mediator (GO:0030330)	13/82	0.158239	0.464497	0	0	1.42356	2.62456	CDKN1A;GADD45A;PLK2;ARID3A;NDRG1;ING4;CNOT11;SESN2;MYO6;UBC;BCL3;SFN;ZNF385A	.
	positive regulation of transmembrane receptor protein serine/threonine kinase signaling pathway (GO:0090100)	13/82	0.158239	0.464497	0	0	1.42356	2.62456	ACVRL1;ACVR1;CDKN2B;NOTCH1;NUMA1;RBPMS;CITED2;HFE;ACVR1B;THBS1;ACVR2B;SDCBP;STK11	.
	cell chemotaxis (GO:0060326)	22190	0.158589	0.46521	0	0	1.51085	2.78214	DOCK4;BIN2;PRKCD;C5AR1;RAB13;HMGB2;RHOG;PLXNB3;ELMO2;DEFB4A	.
	cellular response to organonitrogen compound (GO:0071417)	15/97	0.158971	0.466014	0	0	1.38233	2.54215	GABRB1;PKD2;ACTB;MAPK13;P2RX4;SESN2;NEURL1;CAPN2;CTNNA1;LAMTOR2;LAMTOR1;LAMTOR3;SLC26A6;CPEB4;LAMTOR5	.
	heterotypic cell-cell adhesion (GO:0034113)	44341	0.160895	0.469422	0	0	1.88774	3.4489	ITGB3;ITGB2;ITGAX;CTNNA3;ITGB7	.
	regulation of spindle assembly (GO:0090169)	44341	0.160895	0.469422	0	0	1.88774	3.4489	NUMA1;PLK1;CHMP2A;CHMP4B;CHMP5	.
	chondroitin sulfate proteoglycan biosynthetic process (GO:0050650)	44341	0.160895	0.469422	0	0	1.88774	3.4489	VCAN;CHSY1;CHPF2;CHST15;BGN	.
	positive regulation of neutrophil migration (GO:1902624)	44341	0.160895	0.469422	0	0	1.88774	3.4489	CXCL8;RAC1;PPBP;CXCL5;TIRAP	.
	regulation of vascular smooth muscle cell proliferation (GO:1904705)	44341	0.160895	0.469422	0	0	1.88774	3.4489	IL10;JUN;TPM1;PPARG;MMP9	.
	neutral amino acid transport (GO:0015804)	44341	0.160895	0.469422	0	0	1.88774	3.4489	SLC6A9;SLC7A8;SLC1A1;SLC38A7;SLC1A5	.
	regulation of ryanodine-sensitive calcium-release channel activity (GO:0060314)	44341	0.160895	0.469422	0	0	1.88774	3.4489	SELENON;DMD;SRI;PKD2;CALM2	.
	aminoglycan biosynthetic process (GO:0006023)	17015	0.163785	0.477209	0	0	1.59009	2.8768	SDC4;GPC1;SDC3;GPC3;B3GNT3;HS3ST6;HS6ST1;HS6ST2	.
	cellular response to ionizing radiation (GO:0071479)	17015	0.163785	0.477209	0	0	1.59009	2.8768	CDKN1A;GADD45A;MAP3K20;GRB2;MAPK14;TANK;SPIDR;CRYAB	.
	microtubule bundle formation (GO:0001578)	11841	0.164493	0.478626	0	0	1.74268	3.14534	PSRC1;NUMA1;CHORDC1;PLK1;NAV1;MAPRE2	.
	ATP biosynthetic process (GO:0006754)	11841	0.164493	0.478626	0	0	1.74268	3.14534	VPS9D1;PRKAG2;TCIRG1;ALDOA;ATP6V0A1;SLC25A13	.
	ERBB2 signaling pathway (GO:0038128)	14427	0.165015	0.479822	0	0	1.65206	2.97655	PTPRR;HSP90AA1;SRC;UBC;NRG1;GRB2;EREG	.
	positive regulation of neuron differentiation (GO:0045666)	15/98	0.16863	0.490004	0	0	1.3656	2.43083	SCARB2;LYN;RET;AVIL;TWF2;RHOA;SNX3;FES;PLXNB3;PLXNB2;PTK2B;S100A9;SCARF1;ARSB;MARK2	.
	positive regulation of protein ubiquitination (GO:0031398)	13/83	0.168775	0.490093	0	0	1.40315	2.49647	ARRDC4;GSK3A;PEF1;SMURF1;SPHK1;ARRDC3;PLK1;UBE2D1;SENP2;CLU;UBE2L3;PINK1;TBC1D7	.
	stimulatory C-type lectin receptor signaling pathway (GO:0002223)	18/121	0.170627	0.495138	0	0	1.32072	2.3354	LYN;FCER1G;SRC;PRKCD;CARD9;UBE2D1;ICAM3;CLEC4A;NFKBIA;IKBKB;PSMA6;PSMD6;PAK1;CLEC7A;UBC;BTRC;CLEC4E;RAF1	.
	positive regulation of leukocyte chemotaxis (GO:0002690)	22555	0.171071	0.49576	0	0	1.48115	2.61523	CCR1;CXCL8;SERPINE1;PTK2B;LGALS9;PPBP;IL6R;THBS1;CXCL5;CMKLR1	.
	positive regulation of cellular amide metabolic process (GO:0034250)	22555	0.171071	0.49576	0	0	1.48115	2.61523	GSK3A;FXR2;PRKCD;BCL3;SAMD4A;VIM;CLU;THBS1;TNFRSF1A;PICALM	.
	MAPK cascade (GO:0000165)	38/278	0.174762	0.503071	0	0	1.19757	2.08896	RET;PTGER4;CSF2RB;RASGRP4;IKBKB;PSMD6;ZFP36;SPRED1;UBC;MAP3K20;CTSH;MAPK1;MBP;LGALS9;BTRC;JAK2;JAK3;MAP3K3;MAP2K2;PAQR3;IL18;NRG1;IL17RD;SPTB;EREG;MAPK13;PSMA6;MAPKAPK3;STK24;TNIP2;IL1B;IL2RA;MAPKAPK2;IL3RA;GRB2;LAMTOR2;RAF1;LAMTOR3	.
	membrane fusion (GO:0061025)	19968	0.175	0.503071	0	0	1.51063	2.63299	DNM3;DCSTAMP;GCA;CHORDC1;VPS41;ATG7;STX11;DNM2;VTI1B	.
	regulation of mitotic spindle assembly (GO:1901673)	44305	0.175108	0.503071	0	0	2.01329	3.50787	PLK1;CHMP2A;CHMP4B;CHMP5	.
	positive regulation of chromosome organization (GO:2001252)	44305	0.175108	0.503071	0	0	2.01329	3.50787	BECN1;NUMA1;PPP1R10;SIRT6	.
	cellular polysaccharide catabolic process (GO:0044247)	44305	0.175108	0.503071	0	0	2.01329	3.50787	MGAM;GAA;PHKA2;GYG1	.
	Rac protein signal transduction (GO:0016601)	44305	0.175108	0.503071	0	0	2.01329	3.50787	DBNL;RHOG;BRK1;RAC1	.
	regulation of transcription factor import into nucleus (GO:0042990)	44305	0.175108	0.503071	0	0	2.01329	3.50787	NFKBIA;BAG3;BCL3;HCLS1	.
	intracellular estrogen receptor signaling pathway (GO:0030520)	44305	0.175108	0.503071	0	0	2.01329	3.50787	DDX5;EGLN2;SRC;TADA3	.
	fatty-acyl-CoA metabolic process (GO:0035337)	44305	0.175108	0.503071	0	0	2.01329	3.50787	DGAT2;PPT1;PPT2;FAR2	.
	regulation of neuron migration (GO:2001222)	44305	0.175108	0.503071	0	0	2.01329	3.50787	IGSF10;SHTN1;PLXNB2;SRGAP2	.
	positive regulation of neuron apoptotic process (GO:0043525)	44305	0.175108	0.503071	0	0	2.01329	3.50787	SRPK2;DDIT3;CDK5R1;MCL1	.
	protein exit from endoplasmic reticulum (GO:0032527)	44305	0.175108	0.503071	0	0	2.01329	3.50787	OS9;TMEM129;DERL2;HERPUD1	.
	regulation of myotube differentiation (GO:0010830)	44305	0.175108	0.503071	0	0	2.01329	3.50787	HDAC4;HDAC5;NOTCH1;MAPK14	.
	axonogenesis (GO:0007409)	31/223	0.177255	0.508902	0	0	1.22086	2.11229	RET;SEMA3C;SRC;PTPRO;PIK3CD;VLDLR;RAP1GAP;EFNB1;MAPK7;OPHN1;GPC1;GRB10;MAPK1;SLIT3;VASP;AUTS2;SIAH1;OMG;GAB2;BAIAP2;GP5;SPTB;SHTN1;PARD3;MAP1B;DOK6;LRFN1;PLXNB3;ULK1;GRB2;CDK5R1	.
	polyol metabolic process (GO:0019751)	17380	0.178477	0.511729	0	0	1.54923	2.66978	ITPKC;INPP5A;INPP5D;ITPK1;OCRL;PLCB1;NUDT3;PLCD1	.
	inositol phosphate metabolic process (GO:0043647)	17380	0.178477	0.511729	0	0	1.54923	2.66978	ITPKC;INPP5A;INPP5D;ITPK1;OCRL;PLCB1;NUDT3;PLCD1	.
	ameboidal-type cell migration (GO:0001667)	14793	0.181163	0.5135	0	0	1.60191	2.73663	SEMA4A;SEMA7A;SEMA3C;SEMA4D;FAT2;ITGB7;SRGAP2	.
	neuron migration (GO:0001764)	14793	0.181163	0.5135	0	0	1.60191	2.73663	AUTS2;DNER;DDIT4;NAV1;DISC1;MARK2;CDK5R1	.
	positive regulation of epithelial to mesenchymal transition (GO:0010718)	14793	0.181163	0.5135	0	0	1.60191	2.73663	ACVR1;SDCBP;TCF7L2;NOTCH1;GLIPR2;IL1B;SNAI1	.
	response to growth factor (GO:0070848)	44342	0.181249	0.5135	0	0	1.79774	3.07034	STAT5B;MAPK7;TBC1D7;TWF2;KLF4	.
	positive regulation of interferon-beta production (GO:0032728)	44342	0.181249	0.5135	0	0	1.79774	3.07034	RIOK3;IRF1;FLOT1;TLR4;TLR2	.
	positive regulation of granulocyte chemotaxis (GO:0071624)	44342	0.181249	0.5135	0	0	1.79774	3.07034	CXCL8;RAC1;PPBP;CXCL5;TIRAP	.
	positive regulation of wound healing (GO:0090303)	44342	0.181249	0.5135	0	0	1.79774	3.07034	ANXA1;SERPINE1;F2;THBS1;MYLK	.
	regulation of T cell receptor signaling pathway (GO:0050856)	44342	0.181249	0.5135	0	0	1.79774	3.07034	LGALS3;CD300A;THY1;PTPN2;NECTIN2	.
	lipid modification (GO:0030258)	44342	0.181249	0.5135	0	0	1.79774	3.07034	DGKG;PLPP5;DGKD;CYP3A4;DGKZ	.
	positive regulation of cell-matrix adhesion (GO:0001954)	12206	0.182464	0.5135	0	0	1.67804	2.85469	CDK6;PTK2B;THY1;RAC1;CD36;PPM1F	.
	positive regulation of intrinsic apoptotic signaling pathway (GO:2001244)	12206	0.182464	0.5135	0	0	1.67804	2.85469	NACC2;DDIT3;SIAH1;S100A9;S100A8;BCL2L1	.
	mRNA stabilization (GO:0048255)	12206	0.182464	0.5135	0	0	1.67804	2.85469	ZFP36;SLC11A1;MAPKAPK2;MAPK14;TIRAP;MYD88	.
	water-soluble vitamin metabolic process (GO:0006767)	28460	0.185416	0.5135	0	0	1.39464	2.35019	SLC5A6;PDXK;PC;VNN1;VNN2;TCN2;SLC25A19;PDZD11;TCN1;MTHFD2L;SLC2A3;FOLR2	.
	negative regulation of hemostasis (GO:1900047)	44268	0.188367	0.5135	0	0	2.26463	3.78049	SERPINE1;ADTRP;TFPI	.
	positive regulation of cardiac muscle cell proliferation (GO:0060045)	44268	0.188367	0.5135	0	0	2.26463	3.78049	NOTCH1;PIM1;GLI1	.
	regulation of triglyceride biosynthetic process (GO:0010866)	44268	0.188367	0.5135	0	0	2.26463	3.78049	SCARB1;NR1H3;LDLR	.
	positive regulation of protein complex disassembly (GO:0043243)	44268	0.188367	0.5135	0	0	2.26463	3.78049	INSR;BNIP3;GBA	.
	regulation of macrophage differentiation (GO:0045649)	44268	0.188367	0.5135	0	0	2.26463	3.78049	RIPK1;FADD;PTPN2	.
	alpha-linolenic acid metabolic process (GO:0036109)	44268	0.188367	0.5135	0	0	2.26463	3.78049	SCP2;ACSL1;ACAA1	.
	regulation of cAMP metabolic process (GO:0030814)	44268	0.188367	0.5135	0	0	2.26463	3.78049	RAMP2;RAMP3;PKD2	.
	leukocyte differentiation (GO:0002521)	44268	0.188367	0.5135	0	0	2.26463	3.78049	LYN;BATF3;FLT3	.
	sensory perception of taste (GO:0050909)	44268	0.188367	0.5135	0	0	2.26463	3.78049	PKD1L3;GNAT1;CD36	.
	positive regulation of muscle contraction (GO:0045933)	44268	0.188367	0.5135	0	0	2.26463	3.78049	SPHK1;PROK2;ENO1	.
	regulation of endothelial cell chemotaxis (GO:2001026)	44268	0.188367	0.5135	0	0	2.26463	3.78049	NOTCH1;P2RX4;THBS1	.
	regulation of necrotic cell death (GO:0010939)	44268	0.188367	0.5135	0	0	2.26463	3.78049	UBC;RIPK1;TANK	.
	negative regulation of hormone secretion (GO:0046888)	44268	0.188367	0.5135	0	0	2.26463	3.78049	IL1B;OSM;RAB11FIP5	.
	semaphorin-plexin signaling pathway involved in neuron projection guidance (GO:1902285)	44268	0.188367	0.5135	0	0	2.26463	3.78049	PLXNA2;PLXNB3;PLXNB2	.
	regulation of retinoic acid receptor signaling pathway (GO:0048385)	44268	0.188367	0.5135	0	0	2.26463	3.78049	ASXL1;CTBP2;DHRS3	.
	regulation of fatty acid oxidation (GO:0046320)	44268	0.188367	0.5135	0	0	2.26463	3.78049	ACADVL;PDK4;PRKAG2	.
	energy coupled proton transport, down electrochemical gradient (GO:0015985)	44268	0.188367	0.5135	0	0	2.26463	3.78049	VPS9D1;TCIRG1;ATP6V0A1	.
	regulation of leukocyte migration (GO:0002685)	44268	0.188367	0.5135	0	0	2.26463	3.78049	BST1;ANXA1;HMOX1	.
	endothelial cell differentiation (GO:0045446)	44268	0.188367	0.5135	0	0	2.26463	3.78049	ACVRL1;KDM6B;ACVR2B	.
	regulation of cellular carbohydrate metabolic process (GO:0010675)	44268	0.188367	0.5135	0	0	2.26463	3.78049	PDK4;PDK3;ADIPOR1	.
	intestinal absorption (GO:0050892)	44268	0.188367	0.5135	0	0	2.26463	3.78049	CD36;F11R;SLC26A6	.
	glycerolipid catabolic process (GO:0046503)	44268	0.188367	0.5135	0	0	2.26463	3.78049	ABHD12;PNPLA6;GPCPD1	.
	Notch receptor processing, ligand-dependent (GO:0035333)	44268	0.188367	0.5135	0	0	2.26463	3.78049	APH1A;NOTCH3;PSEN1	.
	regulation of macromolecule biosynthetic process (GO:0010556)	44268	0.188367	0.5135	0	0	2.26463	3.78049	IL12B;IGF2BP2;FOLR2	.
	positive regulation of actin nucleation (GO:0051127)	44268	0.188367	0.5135	0	0	2.26463	3.78049	GSN;WAS;BRK1	.
	cellular calcium ion homeostasis (GO:0006874)	18/123	0.18879	0.5135	0	0	1.29542	2.15962	CCR1;RYR1;CCL14;TRPC5;SLC24A3;PSEN1;SLC35G1;ATP2C2;F2;SELENOK;SLC8B1;TPCN2;HERPUD1;TMEM165;SMDT1;CDH23;MICU1;TPT1	.
	negative regulation of cellular response to growth factor stimulus (GO:0090288)	20333	0.188988	0.5135	0	0	1.47771	2.46197	PTPN1;NOTCH1;HGS;SMURF1;GPC1;RBPMS2;SPRY1;THBS1;EPN2	.
	positive regulation of cysteine-type endopeptidase activity (GO:2001056)	20333	0.188988	0.5135	0	0	1.47771	2.46197	PYCARD;ASPH;CASP1;ARL6IP5;NOD1;FADD;MEFV;PPM1F;BBC3	.
	phospholipid metabolic process (GO:0006644)	25873	0.191329	0.5135	0	0	1.40831	2.32901	PLA2G15;PLA2G4F;PLPP5;GPX4;SMPD1;ENPP2;PLA2G4A;PLBD1;LPL;CLN8;PLCD1	.
	protein deubiquitination (GO:0016579)	35/257	0.192299	0.5135	0	0	1.19214	1.96549	INO80C;USP35;OTUB2;BECN1;ENY2;MINDY1;UBE2D1;ABRAXAS2;NOD1;FOXO4;NOD2;TANK;ACTB;SNX3;POLB;TFPT;PSMD6;UBC;RIPK1;ATXN7L3;SMAD1;MBD6;USP4;TAF10;RHOA;DDB2;NFKBIA;ASXL1;KAT2B;PSMA6;TNIP1;HGS;TNIP2;TNIP3;TADA3	.
	adherens junction assembly (GO:0034333)	44234	0.19339	0.5135	0	0	3.01907	4.96047	RAMP2;PIP5K1C	.
	phosphate ion transmembrane transport (GO:0035435)	44234	0.19339	0.5135	0	0	3.01907	4.96047	SLC37A1;SLC25A10	.
	positive regulation of lamellipodium morphogenesis (GO:2000394)	44234	0.19339	0.5135	0	0	3.01907	4.96047	SRC;ENPP2	.
	negative regulation of interleukin-8 secretion (GO:2000483)	44234	0.19339	0.5135	0	0	3.01907	4.96047	ANXA1;ANXA4	.
	ornithine transport (GO:0015822)	44234	0.19339	0.5135	0	0	3.01907	4.96047	SLC25A29;SLC25A20	.
	regulation of mitochondrial membrane permeability involved in apoptotic process (GO:1902108)	44234	0.19339	0.5135	0	0	3.01907	4.96047	ACAA2;NAIF1	.
	cytoplasmic sequestering of NF-kappaB (GO:0007253)	44234	0.19339	0.5135	0	0	3.01907	4.96047	NFKBIA;IL10	.
	release of sequestered calcium ion into cytosol by endoplasmic reticulum (GO:1903514)	44234	0.19339	0.5135	0	0	3.01907	4.96047	RYR1;NOL3	.
	regulation of sterol transport (GO:0032371)	44234	0.19339	0.5135	0	0	3.01907	4.96047	LRP1;TSPO	.
	lymphatic endothelial cell differentiation (GO:0060836)	44234	0.19339	0.5135	0	0	3.01907	4.96047	ACVRL1;ACVR2B	.
	regulation of toll-like receptor 9 signaling pathway (GO:0034163)	44234	0.19339	0.5135	0	0	3.01907	4.96047	RAB7B;LILRA4	.
	regulation of T-helper 17 type immune response (GO:2000316)	44234	0.19339	0.5135	0	0	3.01907	4.96047	IL23A;IL12B	.
	negative regulation of platelet-derived growth factor receptor-beta signaling pathway (GO:2000587)	44234	0.19339	0.5135	0	0	3.01907	4.96047	LRP1;PTPN2	.
	glycosphingolipid catabolic process (GO:0046479)	44234	0.19339	0.5135	0	0	3.01907	4.96047	NEU1;NAGA	.
	regulation of response to biotic stimulus (GO:0002831)	44234	0.19339	0.5135	0	0	3.01907	4.96047	SCARB2;CD55	.
	positive regulation of protein deubiquitination (GO:1903003)	44234	0.19339	0.5135	0	0	3.01907	4.96047	TNIP1;TANK	.
	L-cysteine metabolic process (GO:0046439)	44234	0.19339	0.5135	0	0	3.01907	4.96047	AHCY;CDO1	.
	regulation of memory T cell differentiation (GO:0043380)	44234	0.19339	0.5135	0	0	3.01907	4.96047	IL23A;IL12B	.
	positive regulation of ER-associated ubiquitin-dependent protein catabolic process (GO:1903071)	44234	0.19339	0.5135	0	0	3.01907	4.96047	NFE2L2;HERPUD1	.
	fructose metabolic process (GO:0006000)	44234	0.19339	0.5135	0	0	3.01907	4.96047	ALDOC;ALDOA	.
	negative regulation of protein kinase activity by regulation of protein phosphorylation (GO:0044387)	44234	0.19339	0.5135	0	0	3.01907	4.96047	ADARB1;PPM1F	.
	positive regulation of killing of cells of other organism (GO:0051712)	44234	0.19339	0.5135	0	0	3.01907	4.96047	PGLYRP4;PGLYRP1	.
	positive regulation of lymphocyte apoptotic process (GO:0070230)	44234	0.19339	0.5135	0	0	3.01907	4.96047	IL10;PRELID1	.
	negative regulation of nitrogen compound metabolic process (GO:0051172)	44234	0.19339	0.5135	0	0	3.01907	4.96047	AP2A1;LDLR	.
	glycosylceramide metabolic process (GO:0006677)	44234	0.19339	0.5135	0	0	3.01907	4.96047	NAGA;ST6GALNAC6	.
	positive regulation of macrophage migration (GO:1905523)	44234	0.19339	0.5135	0	0	3.01907	4.96047	THBS1;CMKLR1	.
	regulation of vitamin D biosynthetic process (GO:0060556)	44234	0.19339	0.5135	0	0	3.01907	4.96047	VDR;SNAI1	.
	negative regulation of membrane protein ectodomain proteolysis (GO:0051045)	44234	0.19339	0.5135	0	0	3.01907	4.96047	IL10;TIMP2	.
	regulation of transcription from RNA polymerase II promoter involved in heart development (GO:1901213)	44234	0.19339	0.5135	0	0	3.01907	4.96047	ACVR1;NOTCH1	.
	positive regulation of triglyceride catabolic process (GO:0010898)	44234	0.19339	0.5135	0	0	3.01907	4.96047	ABHD5;PNPLA2	.
	regulation of dendritic cell differentiation (GO:2001198)	44234	0.19339	0.5135	0	0	3.01907	4.96047	LGALS9;FCGR2B	.
	negative regulation of receptor internalization (GO:0002091)	44234	0.19339	0.5135	0	0	3.01907	4.96047	SDCBP;LRPAP1	.
	positive regulation of tumor necrosis factor-mediated signaling pathway (GO:1903265)	44234	0.19339	0.5135	0	0	3.01907	4.96047	CASP4;CASP1	.
	regulation of toll-like receptor 3 signaling pathway (GO:0034139)	44234	0.19339	0.5135	0	0	3.01907	4.96047	FLOT1;TIRAP	.
	activation of signaling protein activity involved in unfolded protein response (GO:0006987)	44234	0.19339	0.5135	0	0	3.01907	4.96047	PTPN1;PARP16	.
	positive regulation of ceramide biosynthetic process (GO:2000304)	44234	0.19339	0.5135	0	0	3.01907	4.96047	PRKCD;TNFRSF1A	.
	mannose metabolic process (GO:0006013)	44234	0.19339	0.5135	0	0	3.01907	4.96047	MAN2A2;MAN2B1	.
	positive regulation of interleukin-5 production (GO:0032754)	44234	0.19339	0.5135	0	0	3.01907	4.96047	RARA;PRKCZ	.
	activation of cysteine-type endopeptidase activity involved in apoptotic process by cytochrome c (GO:0008635)	44234	0.19339	0.5135	0	0	3.01907	4.96047	CASP7;CASP3	.
	adenylate cyclase-activating dopamine receptor signaling pathway (GO:0007191)	44234	0.19339	0.5135	0	0	3.01907	4.96047	GNG2;GNAL	.
	alditol metabolic process (GO:0019400)	44234	0.19339	0.5135	0	0	3.01907	4.96047	GK5;GK	.
	regulation of calcidiol 1-monooxygenase activity (GO:0060558)	44234	0.19339	0.5135	0	0	3.01907	4.96047	VDR;IL1B	.
	response to caffeine (GO:0031000)	44234	0.19339	0.5135	0	0	3.01907	4.96047	RYR1;SLC8A1	.
	regulation of protein deubiquitination (GO:0090085)	44234	0.19339	0.5135	0	0	3.01907	4.96047	TNIP1;TANK	.
	protein maturation by iron-sulfur cluster transfer (GO:0097428)	44234	0.19339	0.5135	0	0	3.01907	4.96047	NFU1;ISCU	.
	tooth mineralization (GO:0034505)	44234	0.19339	0.5135	0	0	3.01907	4.96047	FAM20C;FAM20A	.
	positive regulation of macrophage chemotaxis (GO:0010759)	44234	0.19339	0.5135	0	0	3.01907	4.96047	THBS1;CMKLR1	.
	positive regulation of type I interferon-mediated signaling pathway (GO:0060340)	44234	0.19339	0.5135	0	0	3.01907	4.96047	NLRC5;FADD	.
	fructose 1,6-bisphosphate metabolic process (GO:0030388)	44234	0.19339	0.5135	0	0	3.01907	4.96047	ALDOC;ALDOA	.
	response to increased oxygen levels (GO:0036296)	44234	0.19339	0.5135	0	0	3.01907	4.96047	ATP6AP1;ATP6V0D1	.
	regulation of protein heterodimerization activity (GO:0043497)	44234	0.19339	0.5135	0	0	3.01907	4.96047	NRG1;CD36	.
	regulation of transcription involved in cell fate commitment (GO:0060850)	44234	0.19339	0.5135	0	0	3.01907	4.96047	CEBPB;PPARG	.
	metanephric nephron tubule development (GO:0072234)	44234	0.19339	0.5135	0	0	3.01907	4.96047	PAX8;PKD2	.
	regulation of systemic arterial blood pressure by renin-angiotensin (GO:0003081)	44234	0.19339	0.5135	0	0	3.01907	4.96047	ACE2;ACE	.
	calcitonin family receptor signaling pathway (GO:0097646)	44234	0.19339	0.5135	0	0	3.01907	4.96047	RAMP2;RAMP3	.
	marginal zone B cell differentiation (GO:0002315)	44234	0.19339	0.5135	0	0	3.01907	4.96047	LFNG;PTK2B	.
	folic acid transport (GO:0015884)	44234	0.19339	0.5135	0	0	3.01907	4.96047	FOLR3;FOLR2	.
	positive regulation of CD4-positive, alpha-beta T cell activation (GO:2000516)	44234	0.19339	0.5135	0	0	3.01907	4.96047	LGALS9;CD55	.
	long-chain fatty acid import (GO:0044539)	44234	0.19339	0.5135	0	0	3.01907	4.96047	ACSL1;CD36	.
	cellular response to gonadotropin stimulus (GO:0071371)	44234	0.19339	0.5135	0	0	3.01907	4.96047	NOTCH1;PAX8	.
	cellular response to caffeine (GO:0071313)	44234	0.19339	0.5135	0	0	3.01907	4.96047	RYR1;SLC8A1	.
	purine nucleotide biosynthetic process (GO:0006164)	44234	0.19339	0.5135	0	0	3.01907	4.96047	AMPD2;HPRT1	.
	negative regulation of muscle hypertrophy (GO:0014741)	44234	0.19339	0.5135	0	0	3.01907	4.96047	RGS2;P2RX4	.
	venous blood vessel development (GO:0060841)	44234	0.19339	0.5135	0	0	3.01907	4.96047	ACVRL1;ACVR2B	.
	erythrocyte development (GO:0048821)	44234	0.19339	0.5135	0	0	3.01907	4.96047	G6PD;GATA1	.
	progesterone receptor signaling pathway (GO:0050847)	44234	0.19339	0.5135	0	0	3.01907	4.96047	SRC;WBP2	.
	negative regulation of leukocyte migration (GO:0002686)	44234	0.19339	0.5135	0	0	3.01907	4.96047	CD300A;HMOX1	.
	positive regulation of lipid transport (GO:0032370)	44234	0.19339	0.5135	0	0	3.01907	4.96047	PRELID1;LRP1	.
	positive regulation of sphingolipid biosynthetic process (GO:0090154)	44234	0.19339	0.5135	0	0	3.01907	4.96047	PRKCD;TNFRSF1A	.
	regulation of monocyte chemotactic protein-1 production (GO:0071637)	44234	0.19339	0.5135	0	0	3.01907	4.96047	IL1B;LGALS9	.
	tachykinin receptor signaling pathway (GO:0007217)	44234	0.19339	0.5135	0	0	3.01907	4.96047	GRK2;TACR3	.
	regulation of extracellular matrix organization (GO:1903053)	44234	0.19339	0.5135	0	0	3.01907	4.96047	NOTCH1;LRP1	.
	oxaloacetate metabolic process (GO:0006107)	44234	0.19339	0.5135	0	0	3.01907	4.96047	STAT5A;STAT5B	.
	positive regulation of epithelial cell differentiation involved in kidney development (GO:2000698)	44234	0.19339	0.5135	0	0	3.01907	4.96047	PAX8;CD24	.
	positive regulation of cellular senescence (GO:2000774)	44234	0.19339	0.5135	0	0	3.01907	4.96047	ARG2;YPEL3	.
	nucleoside diphosphate metabolic process (GO:0009132)	44234	0.19339	0.5135	0	0	3.01907	4.96047	AK1;AK4	.
	nuclear body organization (GO:0030575)	44234	0.19339	0.5135	0	0	3.01907	4.96047	SRPK2;AFF2	.
	regulation of primary metabolic process (GO:0080090)	20/139	0.193546	0.5135	0	0	1.2701	2.08581	CPT1A;LRP1;ACSL1;ADIPOR1;OAZ1;OAZ2;TIAM2;LACTB;PSMA6;PSMD6;GLIPR1;RXRA;PSAP;PPARG;PLIN2;CD36;TBL1X;RGL1;LDLR;PPARD	.
	intrinsic apoptotic signaling pathway in response to DNA damage (GO:0008630)	17746	0.193722	0.5135	0	0	1.51042	2.47909	PYCARD;BCL3;DDIT4;SFN;BCL2L2;PHLDA3;MCL1;BCL2L1	.
	protein K48-linked ubiquitination (GO:0070936)	17746	0.193722	0.5135	0	0	1.51042	2.47909	UBE2B;UBE2Q2;UBE2D3;TTC3;ARIH2;UBE2D1;UBE2G1;RNF5	.
	cellular response to interferon-gamma (GO:0071346)	17/116	0.19554	0.518001	0	0	1.29748	2.11748	CCL14;IFNGR1;HFE;IFNGR2;PRKCD;PTAFR;ACOD1;HCK;IRF1;CASP1;LGALS9;JAK2;FCGR1A;GAPDH;SLC26A6;CD44;CCL16	.
	oligosaccharide metabolic process (GO:0009311)	23285	0.197357	0.522195	0	0	1.42509	2.31255	GALNT11;B4GALT1;NEU1;ST3GAL4;GALNTL5;NAGA;MAN2B1;ST6GALNAC4;ST6GALNAC6;ST3GAL3	.
	antigen processing and presentation of exogenous peptide antigen via MHC class I (GO:0042590)	28825	0.197365	0.522195	0	0	1.37343	2.22867	IKBKB;VAMP8;PSMA6;PSMD6;FCER1G;NCF1;NCF2;HFE;NCF4;CYBA;CD36;FCGR1A	.
	regulation of substrate adhesion-dependent cell spreading (GO:1900024)	15158	0.197939	0.523072	0	0	1.5547	2.5183	DOCK5;CARMIL1;RAC1;ACTN4;OLFM4;DOCK1;CRKL	.
	monocyte chemotaxis (GO:0002548)	15158	0.197939	0.523072	0	0	1.5547	2.5183	CCL14;LGALS3;ANXA1;PTPRO;S100A12;IL6R;CCL16	.
	negative regulation of macromolecule metabolic process (GO:0010605)	18/124	0.198216	0.523212	0	0	1.28312	2.07661	CCR1;ACVRL1;LRPAP1;KDM4A;MAP2K2;NOTCH1;CITED2;WWP2;KLF4;SDCBP;PINK1;PC;FLOT2;LGALS9;LDLR;XDH;OPTN;PICALM	.
	negative regulation of innate immune response (GO:0045824)	44306	0.19993	0.523212	0	0	1.88736	3.03824	NLRC5;ACOD1;TRAFD1;PTPN2	.
	hydrogen peroxide metabolic process (GO:0042743)	44306	0.19993	0.523212	0	0	1.88736	3.03824	PRDX5;GPX1;GPX3;CYBA	.
	phosphatidylethanolamine metabolic process (GO:0046337)	44306	0.19993	0.523212	0	0	1.88736	3.03824	PLA2G15;PHOSPHO1;LPIN2;LPIN3	.
	intrinsic apoptotic signaling pathway in response to DNA damage by p53 class mediator (GO:0042771)	44306	0.19993	0.523212	0	0	1.88736	3.03824	PYCARD;DDIT4;BCL3;PHLDA3	.
	dopamine metabolic process (GO:0042417)	44306	0.19993	0.523212	0	0	1.88736	3.03824	MOXD1;GCH1;MAOA;COMT	.
	androgen metabolic process (GO:0008209)	44306	0.19993	0.523212	0	0	1.88736	3.03824	DHRS9;SRD5A3;CYP3A4;HSD17B11	.
	regulation of anoikis (GO:2000209)	44306	0.19993	0.523212	0	0	1.88736	3.03824	NOTCH1;SRC;PDK4;MCL1	.
	positive regulation of gene silencing by miRNA (GO:2000637)	44306	0.19993	0.523212	0	0	1.88736	3.03824	DDX5;ZFP36;MAP2K2;STAT3	.
	regulation of toll-like receptor signaling pathway (GO:0034121)	44306	0.19993	0.523212	0	0	1.88736	3.03824	IRF1;CD36;SMPDL3B;TLR2	.
	heparan sulfate proteoglycan metabolic process (GO:0030201)	44306	0.19993	0.523212	0	0	1.88736	3.03824	GPC1;HS6ST1;HS6ST2;SGSH	.
	positive regulation of cAMP biosynthetic process (GO:0030819)	44306	0.19993	0.523212	0	0	1.88736	3.03824	RAMP2;RAMP3;SCT;CALM2	.
	mesoderm formation (GO:0001707)	44306	0.19993	0.523212	0	0	1.88736	3.03824	KDM6B;ITGB3;ITGA2;SNAI1	.
	wound healing, spreading of cells (GO:0044319)	44306	0.19993	0.523212	0	0	1.88736	3.03824	ACVRL1;CD151;RHOA;CD44	.
	regulation of lipoprotein lipase activity (GO:0051004)	44306	0.19993	0.523212	0	0	1.88736	3.03824	SORT1;NR1H3;LPL;FURIN	.
	axon extension (GO:0048675)	44306	0.19993	0.523212	0	0	1.88736	3.03824	AUTS2;PLXNB3;ULK1;SLIT3	.
	positive regulation of leukocyte migration (GO:0002687)	12571	0.201166	0.524856	0	0	1.61802	2.59469	LGALS3;CXCL8;THY1;PPBP;IL6R;CXCL5	.
	regulation of wound healing (GO:0061041)	12571	0.201166	0.524856	0	0	1.61802	2.59469	ANXA1;PLAU;SERPINE1;GP1BA;F2;MYLK	.
	endoplasmic reticulum organization (GO:0007029)	12571	0.201166	0.524856	0	0	1.61802	2.59469	VMP1;RTN3;TMEM33;REEP2;RAB18;TMCC1	.
	negative regulation of cellular metabolic process (GO:0031324)	12571	0.201166	0.524856	0	0	1.61802	2.59469	LRPAP1;SDCBP;PINK1;ITGB3;PPARG;OPTN	.
	keratan sulfate metabolic process (GO:0042339)	12571	0.201166	0.524856	0	0	1.61802	2.59469	GALNS;B4GALT1;ST3GAL4;B3GNT3;B4GALT4;ST3GAL3	.
	regulation of peptidyl-serine phosphorylation (GO:0033135)	13/86	0.202381	0.525451	0	0	1.34525	2.14918	TENM1;RAMP3;PAQR3;OSM;PPM1F;PAK1;PINK1;CNKSR3;DDIT4;HCLS1;DMD;RAF1;CD44	.
	positive regulation of lipid kinase activity (GO:0090218)	44343	0.20249	0.525451	0	0	1.71593	2.74045	FGR;FLT3;PTK2B;NOD2;F2	.
	transition metal ion transport (GO:0000041)	44343	0.20249	0.525451	0	0	1.71593	2.74045	TRPC5;SLC31A2;SLC11A1;SLC39A8;ATOX1	.
	negative regulation of myeloid leukocyte differentiation (GO:0002762)	44343	0.20249	0.525451	0	0	1.71593	2.74045	MAFB;CDK6;RARA;TLR4;PTPN2	.
	negative regulation of cell-matrix adhesion (GO:0001953)	44343	0.20249	0.525451	0	0	1.71593	2.74045	ACVRL1;SRC;DLC1;SERPINE1;THBS1	.
	negative regulation of organelle assembly (GO:1902116)	44343	0.20249	0.525451	0	0	1.71593	2.74045	KAT2B;PINK1;TBC1D7;CHMP4B;NBDY	.
	regulation of autophagy of mitochondrion (GO:1903146)	44343	0.20249	0.525451	0	0	1.71593	2.74045	GSK3A;PINK1;SLC17A9;CTSK;VDAC1	.
	cellular response to topologically incorrect protein (GO:0035967)	44343	0.20249	0.525451	0	0	1.71593	2.74045	UBE2W;HSPH1;DNAJB12;HYOU1;OPTN	.
	phosphatidylcholine acyl-chain remodeling (GO:0036151)	44343	0.20249	0.525451	0	0	1.71593	2.74045	PLA2G4F;LPCAT3;LPCAT2;PLA2G4A;PLBD1	.
	regulation of cell motility (GO:2000145)	16/109	0.202635	0.525513	0	0	1.29983	2.07498	CSF1R;WAS;MEMO1;NRG1;RHOA;EREG;ADGRG3;CDK6;FES;ENPP2;PLXNA2;PLXNB3;PLXNB2;RAC1;RAF1;SGK1	.
	negative regulation of cellular catabolic process (GO:0031330)	20699	0.203443	0.52729	0	0	1.44619	2.30287	IL10;CST3;KDM4A;GSK3A;DLC1;TIMP2;TBC1D14;WASHC1;MCL1	.
	phosphatidylcholine metabolic process (GO:0046470)	26238	0.204121	0.528413	0	0	1.38476	2.20044	PLA2G15;PLA2G4F;PHOSPHO1;GPAT4;LPCAT3;LPCAT2;ENPP2;PLA2G4A;PLBD1;LPIN2;LPIN3	.
	organelle membrane fusion (GO:0090174)	26238	0.204121	0.528413	0	0	1.38476	2.20044	RPH3A;VAMP8;SYT4;STX17;STX6;CHMP3;STX5;STX4;STX3;STX2;STX11	.
	negative regulation of multicellular organismal process (GO:0051241)	18/125	0.207863	0.537779	0	0	1.27106	1.99668	LRPAP1;GSK3A;PTPRR;NOTCH1;SLC11A1;PTPRO;FUZ;KREMEN2;ADIPOR1;SLC6A4;PTPRG;PROCR;SDHAF2;CHSY1;DDIT3;IL1B;WWC3;RAB11FIP5	.
	protein heterooligomerization (GO:0051291)	18111	0.209483	0.541644	0	0	1.47349	2.30324	SCUBE3;ANXA2;INSR;TMEM120A;CHMP2A;CHMP3;RIPK1;TMCC1	.
	cell-cell junction assembly (GO:0007043)	29190	0.20965	0.541752	0	0	1.35286	2.11359	RAMP2;GJB2;WDR1;CDH20;PARD3;EPB41L3;RAB13;CTNNA1;CD9;F11R;TLN1;RHOA	.
	inorganic anion transmembrane transport (GO:0098661)	23651	0.211118	0.544894	0	0	1.39862	2.17533	CLCN7;GABRB1;SLC37A1;SLC1A1;SLC26A8;SLC25A10;SLC12A7;CLCN2;SLC12A8;SLC26A6	.
	cellular response to decreased oxygen levels (GO:0036294)	23651	0.211118	0.544894	0	0	1.39862	2.17533	BNIP3L;PINK1;ACAA2;BNIP3;PGK1;HMOX1;HYOU1;P4HB;NDRG1;CPEB4	.
	regulation of protein modification process (GO:0031399)	15523	0.215293	0.555337	0	0	1.5102	2.3193	LYN;SPRED1;STAT2;SESN2;FN1;PLXNB2;ATG7	.
	epidermal growth factor receptor signaling pathway (GO:0007173)	21064	0.218335	0.557847	0	0	1.41598	2.15473	DGKD;SRC;FES;PXN;TGFA;PTK2B;GRB2;AREG;EREG	.
	proteasomal protein catabolic process (GO:0010498)	32/237	0.219218	0.557847	0	0	1.17996	1.79081	GSK3A;ANAPC15;ANAPC16;UBE2D3;UBE2D1;RNF5;RMND5B;PSMD6;MAEA;UBC;TBL1X;BTRC;SOCS6;UBXN6;FBXW5;UBE2B;RNF24;SMURF1;SIAH1;DNAJB12;BTBD11;WWP2;ARMC8;ABTB2;PSMA6;SPSB2;UBE2W;HECW2;DDIT3;RBCK1;RNF122;NFE2L2	.
	regulation of Golgi organization (GO:1903358)	44269	0.220178	0.557847	0	0	2.05864	3.11538	MAP2K2;MAPK1;STX5	.
	myeloid dendritic cell activation (GO:0001773)	44269	0.220178	0.557847	0	0	2.05864	3.11538	PYCARD;DCSTAMP;BATF3	.
	regulation of lipase activity (GO:0060191)	44269	0.220178	0.557847	0	0	2.05864	3.11538	LPL;FURIN;RHOA	.
	retrograde transport, endosome to plasma membrane (GO:1990126)	44269	0.220178	0.557847	0	0	2.05864	3.11538	VPS26A;WASHC1;VPS39	.
	negative regulation of hemopoiesis (GO:1903707)	44269	0.220178	0.557847	0	0	2.05864	3.11538	MEIS1;CDK6;PTK2B	.
	negative regulation of secretion (GO:0051048)	44269	0.220178	0.557847	0	0	2.05864	3.11538	VAMP8;NR1H3;NRG1	.
	hydrogen peroxide catabolic process (GO:0042744)	44269	0.220178	0.557847	0	0	2.05864	3.11538	PRDX5;GPX1;GPX3	.
	amyloid-beta metabolic process (GO:0050435)	44269	0.220178	0.557847	0	0	2.05864	3.11538	APH1A;ACE;PSEN1	.
	monosaccharide transport (GO:0015749)	44269	0.220178	0.557847	0	0	2.05864	3.11538	SLC2A9;SLC2A6;SLC2A8	.
	cellular response to osmotic stress (GO:0071470)	44269	0.220178	0.557847	0	0	2.05864	3.11538	CAPN3;PKD2;MYLK	.
	regulation of fatty acid metabolic process (GO:0019217)	44269	0.220178	0.557847	0	0	2.05864	3.11538	PDK4;PRKAG2;ADIPOR1	.
	positive regulation of DNA damage response, signal transduction by p53 class mediator (GO:0043517)	44269	0.220178	0.557847	0	0	2.05864	3.11538	DDX5;SPRED1;ZNF385A	.
	Golgi to vacuole transport (GO:0006896)	44269	0.220178	0.557847	0	0	2.05864	3.11538	LAMP1;ANKFY1;VTI1B	.
	epiboly involved in wound healing (GO:0090505)	44269	0.220178	0.557847	0	0	2.05864	3.11538	CD151;RHOA;CD44	.
	positive regulation of vascular smooth muscle cell proliferation (GO:1904707)	44269	0.220178	0.557847	0	0	2.05864	3.11538	IL10;JUN;MMP9	.
	fatty acid transport (GO:0015908)	44269	0.220178	0.557847	0	0	2.05864	3.11538	SLC25A17;PPARG;PPARD	.
	nucleoside triphosphate metabolic process (GO:0009141)	44269	0.220178	0.557847	0	0	2.05864	3.11538	AK1;AK4;SMPDL3A	.
	regulation of protein modification by small protein conjugation or removal (GO:1903320)	44269	0.220178	0.557847	0	0	2.05864	3.11538	HSP90AA1;PINK1;WASHC1	.
	negative regulation of T cell receptor signaling pathway (GO:0050860)	44269	0.220178	0.557847	0	0	2.05864	3.11538	LGALS3;THY1;PTPN2	.
	neuron cell-cell adhesion (GO:0007158)	44269	0.220178	0.557847	0	0	2.05864	3.11538	RET;NINJ2;CDK5R1	.
	positive regulation of myoblast differentiation (GO:0045663)	44269	0.220178	0.557847	0	0	2.05864	3.11538	BTG1;MAPK14;PLCB1	.
	stem cell development (GO:0048864)	44269	0.220178	0.557847	0	0	2.05864	3.11538	PEF1;NRG1;TAPT1	.
	regulation of activin receptor signaling pathway (GO:0032925)	44269	0.220178	0.557847	0	0	2.05864	3.11538	ACVR1;ACVR1B;ACVR2B	.
	regulation of phosphate metabolic process (GO:0019220)	44269	0.220178	0.557847	0	0	2.05864	3.11538	IKBKB;PSEN1;CD24	.
	regulation of cyclin-dependent protein kinase activity (GO:1904029)	12936	0.220529	0.557847	0	0	1.56214	2.36152	CDKN2D;CDKN1A;CDKN2B;SERTAD1;GADD45A;CDK5R1	.
	negative regulation of cell-substrate adhesion (GO:0010812)	12936	0.220529	0.557847	0	0	1.56214	2.36152	NOTCH1;FZD4;PTPRO;ACTN4;THBS1;RHOA	.
	negative regulation of protein complex assembly (GO:0031333)	12936	0.220529	0.557847	0	0	1.56214	2.36152	PTGER4;ULK1;MEFV;RAF1;PRKCZ;SORL1	.
	negative regulation of epithelial cell migration (GO:0010633)	12936	0.220529	0.557847	0	0	1.56214	2.36152	ACVRL1;PTPRR;ADIPOR1;SYNJ2BP;THBS1;PTPRG	.
	regulation of mitochondrial membrane potential (GO:0051881)	12936	0.220529	0.557847	0	0	1.56214	2.36152	PRELID1;PINK1;ARL6IP5;BCO2;SLC25A33;BCL2L1	.
	positive regulation of osteoblast differentiation (GO:0045669)	12936	0.220529	0.557847	0	0	1.56214	2.36152	ACVR1;IFITM1;ATP6AP1;IL6R;ACVR2B;LTF	.
	regulation of endothelial cell apoptotic process (GO:2000351)	12936	0.220529	0.557847	0	0	1.56214	2.36152	RAMP2;MAPK7;TNIP2;SERPINE1;THBS1;NFE2L2	.
	positive regulation of macromolecule biosynthetic process (GO:0010557)	20/142	0.22103	0.558787	0	0	1.23865	1.86969	INSR;GBA;NLRC5;SAMD4A;NR1H3;NOD2;GLI1;F2;KLF4;AREG;THBS1;EREG;NLRP12;HSPH1;FXR2;BCL3;VIM;JAK2;TLR4;TLR2	.
	cellular response to ketone (GO:1901655)	44344	0.224509	0.564692	0	0	1.64123	2.45174	PTGER4;GNG2;SRC;ACOD1;ADCY6	.
	cellular response to alcohol (GO:0097306)	44344	0.224509	0.564692	0	0	1.64123	2.45174	PTGER4;GNG2;CTNNA1;SPIDR;ADCY6	.
	negative regulation of homeostatic process (GO:0032845)	44344	0.224509	0.564692	0	0	1.64123	2.45174	ZFP36;MAFB;TSC22D3;TMBIM6;FADD	.
	triglyceride homeostasis (GO:0070328)	44344	0.224509	0.564692	0	0	1.64123	2.45174	SCARB1;DGAT2;IL18;LPL;NR1H3	.
	dopamine receptor signaling pathway (GO:0007212)	44344	0.224509	0.564692	0	0	1.64123	2.45174	GSK3A;GNG2;GNAL;GNA11;ADCY6	.
	regulation of fatty acid biosynthetic process (GO:0042304)	44344	0.224509	0.564692	0	0	1.64123	2.45174	ACADVL;PDK4;PRKAG2;NR1H3;ADIPOR1	.
	positive regulation of fibroblast proliferation (GO:0048146)	44344	0.224509	0.564692	0	0	1.64123	2.45174	CDKN1A;CDK6;SPHK1;FN1;EREG	.
	mRNA transcription (GO:0009299)	44307	0.225718	0.564692	0	0	1.77623	2.64387	DDX5;DDIT3;C5AR1;EREG	.
	dendritic cell differentiation (GO:0097028)	44307	0.225718	0.564692	0	0	1.77623	2.64387	LYN;DCSTAMP;BATF3;FLT3	.
	phospholipid translocation (GO:0045332)	44307	0.225718	0.564692	0	0	1.77623	2.64387	ATP8B4;ATP8A2;ABCA7;ATP9A	.
	ventricular septum morphogenesis (GO:0060412)	44307	0.225718	0.564692	0	0	1.77623	2.64387	ACVR1;NOTCH1;CITED2;ZFPM2	.
	mitochondrial calcium ion transmembrane transport (GO:0006851)	44307	0.225718	0.564692	0	0	1.77623	2.64387	SMDT1;MICU3;MICU1;SLC8B1	.
	hepaticobiliary system development (GO:0061008)	44307	0.225718	0.564692	0	0	1.77623	2.64387	RARG;CITED2;RARA;PKD2	.
	glutamate metabolic process (GO:0006536)	44307	0.225718	0.564692	0	0	1.77623	2.64387	NAGS;GGT1;PRODH;GLUL	.
	positive regulation of transcription from RNA polymerase II promoter involved in cellular response to chemical stimulus (GO:1901522)	44307	0.225718	0.564692	0	0	1.77623	2.64387	SMAD1;NOTCH1;SESN2;NFE2L2	.
	fatty acid beta-oxidation (GO:0006635)	18476	0.22572	0.564692	0	0	1.43833	2.14089	ACADVL;ACAA2;SLC25A17;AUH;SCP2;ACAA1;CRAT;PPARD	.
	regulation of bone mineralization (GO:0030500)	18476	0.22572	0.564692	0	0	1.43833	2.14089	ACVR1;SRGN;CCR1;ECM1;BMP2K;PTK2B;ACVR2B;SLC8A1	.
	blood circulation (GO:0008015)	18476	0.22572	0.564692	0	0	1.43833	2.14089	ACVRL1;NFE2;HTR7;GPX1;ACE;ADORA2A;ELN;TBC1D8	.
	regulation of protein targeting to mitochondrion (GO:1903214)	13/88	0.226322	0.565544	0	0	1.30923	1.94525	OSCP1;GSK3A;UBE2D3;NRG1;HNMT;UBE2L3;UBL5;CYB5R1;PINK1;SLC17A9;CTSK;ITGAX;ARIH2	.
	regulation of proteasomal ubiquitin-dependent protein catabolic process (GO:0032434)	13/88	0.226322	0.565544	0	0	1.30923	1.94525	GSK3A;HFE;PLK1;RNF19B;CSNK1E;CLU;RNF144B;SDCBP;RNF217;ARIH2;LONRF3;TRIB1;LONRF1	.
	cellular response to organic cyclic compound (GO:0071407)	19/135	0.229311	0.572349	0	0	1.23748	1.82241	GABRB1;RAMP3;RIOK3;IL18;PKD2;TFPI;SPIDR;ACTB;ADCY6;UBE2L3;FAM210B;CASP7;GNG2;P2RX4;CASP3;IL1B;CTNNA1;ADTRP;SLC26A6	.
	mitochondrial transport (GO:0006839)	19/135	0.229311	0.572349	0	0	1.23748	1.82241	TIMM8B;STARD3;HSP90AA1;BNIP3;SLC25A16;SLC25A37;SLC25A29;PINK1;SLC25A17;SLC25A19;UCP2;TSPO;SLC25A10;SLC25A20;SLC25A11;SLC25A33;BCL2L1;SLC25A13;SLC25A24	.
	B cell activation (GO:0042113)	26969	0.230753	0.572627	0	0	1.33993	1.96489	IL10;LAT2;HDAC4;ADGRG3;HDAC5;FLT3;NFAM1;PIK3CD;DNAJB9;JAK3;PTPN2	.
	lymphocyte differentiation (GO:0030098)	26969	0.230753	0.572627	0	0	1.33993	1.96489	LFNG;IL10;HDAC4;ADGRG3;HDAC5;FLT3;NFAM1;PIK3CD;DNAJB9;JAK3;PTPN2	.
	protein N-linked glycosylation (GO:0006487)	26969	0.230753	0.572627	0	0	1.33993	1.96489	DPM2;MCFD2;DPM3;B4GALT1;TMEM258;CCDC126;ST3GAL4;ST6GALNAC4;ST6GALNAC6;TMEM165;ST3GAL3	.
	positive regulation of vasculature development (GO:1904018)	15/104	0.232411	0.572627	0	0	1.2731	1.85777	ECM1;RAMP2;CXCL8;BTG1;HSPB6;ANXA3;TNFSF12;SPHK1;SERPINE1;THBS1;HYAL1;IL1B;HMOX1;CTSH;CHI3L1	.
	neuron projection development (GO:0031175)	23/167	0.233079	0.572627	0	0	1.20687	1.75767	LYN;DBNL;WHRN;RHOG;FRY;RAB11A;DNM2;EHD1;SHTN1;DBNDD1;PAK1;OPHN1;STK24;MAP2;EPB41L3;RAB13;ULK1;TBC1D23;RAC1;STX3;SRGAP2;SGK1;CDK5R1	.
	negative regulation of protein metabolic process (GO:0051248)	15888	0.233171	0.572627	0	0	1.46816	2.13762	SNX3;ITGB3;FLOT2;CLU;RILP;LDLR;CRYAB	.
	Golgi to lysosome transport (GO:0090160)	44235	0.238838	0.572627	0	0	2.51575	3.60248	LAMP1;ANKFY1	.
	biomineral tissue development (GO:0031214)	44235	0.238838	0.572627	0	0	2.51575	3.60248	FAM20C;FAM20A	.
	positive regulation of macrophage differentiation (GO:0045651)	44235	0.238838	0.572627	0	0	2.51575	3.60248	RIPK1;FADD	.
	stress-induced premature senescence (GO:0090400)	44235	0.238838	0.572627	0	0	2.51575	3.60248	CDKN1A;MAPK14	.
	integrin activation (GO:0033622)	44235	0.238838	0.572627	0	0	2.51575	3.60248	FN1;FERMT3	.
	galactose catabolic process (GO:0019388)	44235	0.238838	0.572627	0	0	2.51575	3.60248	GALE;GALK1	.
	negative regulation of lipase activity (GO:0060192)	44235	0.238838	0.572627	0	0	2.51575	3.60248	RGS2;SORT1	.
	intestinal cholesterol absorption (GO:0030299)	44235	0.238838	0.572627	0	0	2.51575	3.60248	CD36;LDLR	.
	negative regulation of glucose import (GO:0046325)	44235	0.238838	0.572627	0	0	2.51575	3.60248	GSK3A;GRB10	.
	regulation of T cell mediated immunity (GO:0002709)	44235	0.238838	0.572627	0	0	2.51575	3.60248	IL1B;WAS	.
	imidazole-containing compound catabolic process (GO:0052805)	44235	0.238838	0.572627	0	0	2.51575	3.60248	HAL;HNMT	.
	regulation of ATP biosynthetic process (GO:2001169)	44235	0.238838	0.572627	0	0	2.51575	3.60248	PINK1;ENO1	.
	regulation of striated muscle cell differentiation (GO:0051153)	44235	0.238838	0.572627	0	0	2.51575	3.60248	HDAC5;NRG1	.
	central nervous system myelination (GO:0022010)	44235	0.238838	0.572627	0	0	2.51575	3.60248	MYRF;CLU	.
	negative regulation of retrograde protein transport, ER to cytosol (GO:1904153)	44235	0.238838	0.572627	0	0	2.51575	3.60248	OS9;DERL2	.
	positive regulation of IRE1-mediated unfolded protein response (GO:1903896)	44235	0.238838	0.572627	0	0	2.51575	3.60248	PTPN1;TMEM33	.
	dimeric G-protein coupled receptor signaling pathway (GO:0038042)	44235	0.238838	0.572627	0	0	2.51575	3.60248	RAMP2;RAMP3	.
	regulation of store-operated calcium entry (GO:2001256)	44235	0.238838	0.572627	0	0	2.51575	3.60248	HOMER3;SLC8B1	.
	positive regulation of tumor necrosis factor biosynthetic process (GO:0042535)	44235	0.238838	0.572627	0	0	2.51575	3.60248	THBS1;TLR4	.
	negative regulation of centriole replication (GO:0046600)	44235	0.238838	0.572627	0	0	2.51575	3.60248	KAT2B;CHMP2A	.
	histidine catabolic process (GO:0006548)	44235	0.238838	0.572627	0	0	2.51575	3.60248	HAL;HNMT	.
	negative regulation of establishment of protein localization (GO:1904950)	44235	0.238838	0.572627	0	0	2.51575	3.60248	SNX3;WWP2	.
	tyrosine phosphorylation of STAT protein (GO:0007260)	44235	0.238838	0.572627	0	0	2.51575	3.60248	JAK2;JAK3	.
	amyloid precursor protein catabolic process (GO:0042987)	44235	0.238838	0.572627	0	0	2.51575	3.60248	APH1A;PSEN1	.
	B cell mediated immunity (GO:0019724)	44235	0.238838	0.572627	0	0	2.51575	3.60248	FCER1G;FCGR2B	.
	arachidonate transport (GO:1903963)	44235	0.238838	0.572627	0	0	2.51575	3.60248	ACE;NMUR2	.
	inositol phosphate catabolic process (GO:0071545)	44235	0.238838	0.572627	0	0	2.51575	3.60248	INPP5A;NUDT3	.
	histidine metabolic process (GO:0006547)	44235	0.238838	0.572627	0	0	2.51575	3.60248	HAL;HNMT	.
	cGMP-mediated signaling (GO:0019934)	44235	0.238838	0.572627	0	0	2.51575	3.60248	PDZD3;CD36	.
	polyol transport (GO:0015791)	44235	0.238838	0.572627	0	0	2.51575	3.60248	SLC2A13;SLC26A6	.
	cellular response to purine-containing compound (GO:0071415)	44235	0.238838	0.572627	0	0	2.51575	3.60248	RYR1;SLC8A1	.
	cellular biogenic amine catabolic process (GO:0042402)	44235	0.238838	0.572627	0	0	2.51575	3.60248	SMOX;HNMT	.
	basement membrane organization (GO:0071711)	44235	0.238838	0.572627	0	0	2.51575	3.60248	RAMP2;CTSS	.
	ventricular trabecula myocardium morphogenesis (GO:0003222)	44235	0.238838	0.572627	0	0	2.51575	3.60248	NOTCH1;NRG1	.
	rRNA pseudouridine synthesis (GO:0031118)	44235	0.238838	0.572627	0	0	2.51575	3.60248	MRPL1;NOP10	.
	negative regulation of neuron projection regeneration (GO:0070571)	44235	0.238838	0.572627	0	0	2.51575	3.60248	THY1;CERS2	.
	positive regulation of mitochondrial membrane permeability involved in apoptotic process (GO:1902110)	44235	0.238838	0.572627	0	0	2.51575	3.60248	BNIP3L;BNIP3	.
	positive regulation of respiratory burst (GO:0060267)	44235	0.238838	0.572627	0	0	2.51575	3.60248	INSR;LBP	.
	regulation of response to oxidative stress (GO:1902882)	44235	0.238838	0.572627	0	0	2.51575	3.60248	SELENON;PINK1	.
	nucleotide phosphorylation (GO:0046939)	44235	0.238838	0.572627	0	0	2.51575	3.60248	AK1;AK4	.
	positive regulation of production of miRNAs involved in gene silencing by miRNA (GO:1903800)	44235	0.238838	0.572627	0	0	2.51575	3.60248	DDX5;MAP2K2	.
	acylglycerol acyl-chain remodeling (GO:0036155)	44235	0.238838	0.572627	0	0	2.51575	3.60248	DGAT2;PNPLA2	.
	positive regulation of viral entry into host cell (GO:0046598)	44235	0.238838	0.572627	0	0	2.51575	3.60248	P4HB;LGALS9	.
	positive regulation of protein homodimerization activity (GO:0090073)	44235	0.238838	0.572627	0	0	2.51575	3.60248	TANK;TIRAP	.
	glycerol-3-phosphate metabolic process (GO:0006072)	44235	0.238838	0.572627	0	0	2.51575	3.60248	GK5;GK	.
	regulation of peroxisome proliferator activated receptor signaling pathway (GO:0035358)	44235	0.238838	0.572627	0	0	2.51575	3.60248	ASXL1;CITED2	.
	arginine catabolic process (GO:0006527)	44235	0.238838	0.572627	0	0	2.51575	3.60248	ARG2;PADI4	.
	regulation of receptor binding (GO:1900120)	44235	0.238838	0.572627	0	0	2.51575	3.60248	HFE;MMP9	.
	succinate metabolic process (GO:0006105)	44235	0.238838	0.572627	0	0	2.51575	3.60248	STAT5A;STAT5B	.
	kidney mesenchyme development (GO:0072074)	44235	0.238838	0.572627	0	0	2.51575	3.60248	BASP1;PKD2	.
	exocyst localization (GO:0051601)	44235	0.238838	0.572627	0	0	2.51575	3.60248	EXOC3L2;STXBP6	.
	barbed-end actin filament capping (GO:0051016)	44235	0.238838	0.572627	0	0	2.51575	3.60248	CAPZB;TWF2	.
	positive regulation of cell aging (GO:0090343)	44235	0.238838	0.572627	0	0	2.51575	3.60248	ARG2;YPEL3	.
	late endosome to vacuole transport (GO:0045324)	44235	0.238838	0.572627	0	0	2.51575	3.60248	BECN1;TMEM50A	.
	defense response to protozoan (GO:0042832)	44235	0.238838	0.572627	0	0	2.51575	3.60248	CLEC7A;SLC11A1	.
	regulation of amyloid precursor protein catabolic process (GO:1902991)	44235	0.238838	0.572627	0	0	2.51575	3.60248	FLOT2;PICALM	.
	nucleoside diphosphate phosphorylation (GO:0006165)	44235	0.238838	0.572627	0	0	2.51575	3.60248	AK1;AK4	.
	aorta development (GO:0035904)	44235	0.238838	0.572627	0	0	2.51575	3.60248	LRP1;PKD2	.
	negative regulation of leukocyte mediated cytotoxicity (GO:0001911)	44235	0.238838	0.572627	0	0	2.51575	3.60248	LGALS9;FCGR2B	.
	positive regulation of transforming growth factor beta production (GO:0071636)	44235	0.238838	0.572627	0	0	2.51575	3.60248	LGALS9;THBS1	.
	SMAD protein complex assembly (GO:0007183)	44235	0.238838	0.572627	0	0	2.51575	3.60248	SMAD1;ZFYVE9	.
	coronary vasculature morphogenesis (GO:0060977)	44235	0.238838	0.572627	0	0	2.51575	3.60248	SPRED1;NOTCH1	.
	negative regulation of T-helper cell differentiation (GO:0045623)	44235	0.238838	0.572627	0	0	2.51575	3.60248	ANXA1;JAK3	.
	arachidonic acid secretion (GO:0050482)	44235	0.238838	0.572627	0	0	2.51575	3.60248	ACE;NMUR2	.
	spleen development (GO:0048536)	44235	0.238838	0.572627	0	0	2.51575	3.60248	CITED2;FADD	.
	purine ribonucleotide metabolic process (GO:0009150)	24381	0.239753	0.574502	0	0	1.34852	1.92588	SULT1A1;PODXL2;GMPR;AK3;CTNS;AK4;HPRT1;NT5C2;RHOQ;NADK	.
	plasma membrane organization (GO:0007009)	13302	0.240477	0.574962	0	0	1.50998	2.15191	EHD2;BIN2;PLSCR2;EPB41L3;SNX33;STX2	.
	regulation of cell morphogenesis involved in differentiation (GO:0010769)	13302	0.240477	0.574962	0	0	1.50998	2.15191	PAK1;FXR2;SEMA4D;HECW2;SSH3;MARK2	.
	regulation of cysteine-type endopeptidase activity (GO:2000116)	13302	0.240477	0.574962	0	0	1.50998	2.15191	CST3;PYCARD;NLRP12;MEFV;BBC3;LTF	.
	regulation of filopodium assembly (GO:0051489)	13302	0.240477	0.574962	0	0	1.50998	2.15191	TENM1;CAPZB;PRKCD;NEURL1;ARAP1;RHOQ	.
	protein localization to organelle (GO:0033365)	14/97	0.241586	0.577292	0	0	1.27401	1.80977	PPP1R15A;PAQR3;ABCA7;SNX10;SORL1;RAB11A;EHD1;LAMP1;TSPAN17;BBS9;OBSL1;ATP6V1D;OPTN;CNTLN	.
	positive regulation of GTPase activity (GO:0043547)	26/192	0.242645	0.579504	0	0	1.18353	1.67606	CCL14;TBC1D9B;THY1;F11R;RAP1GAP;ARHGAP21;TBC1D14;RSU1;TBC1D12;SRGAP2;TBC1D22A;CCL16;TBC1D10B;NDEL1;SEMA4D;RALGAPA2;RHOG;TBC1D8;TBC1D9;ARAP1;TBC1D2;SNX18;TBC1D7;RGS10;TAX1BP3;PICALM	.
	regulation of G-protein coupled receptor protein signaling pathway (GO:0008277)	27334	0.244551	0.583731	0	0	1.31859	1.85702	GIT2;RGS2;CXCL8;GNG4;GNG7;PLEK;GNAT1;RPGRIP1L;PPEF1;PLCB1;RASGRP4	.
	synaptic vesicle endocytosis (GO:0048488)	44345	0.247193	0.586276	0	0	1.57276	2.19806	DNM3;OPHN1;ITSN1;PIP5K1C;DNM2	.
	keratan sulfate biosynthetic process (GO:0018146)	44345	0.247193	0.586276	0	0	1.57276	2.19806	B4GALT1;ST3GAL4;B3GNT3;B4GALT4;ST3GAL3	.
	lysosome localization (GO:0032418)	44345	0.247193	0.586276	0	0	1.57276	2.19806	PLEKHM1;PIK3CD;LAMTOR1;DEF8;NDEL1	.
	skeletal muscle organ development (GO:0060538)	44345	0.247193	0.586276	0	0	1.57276	2.19806	IGSF8;SVIL;MYL6;BASP1;LARGE1	.
	regulation of cellular biosynthetic process (GO:0031326)	44345	0.247193	0.586276	0	0	1.57276	2.19806	PDK4;PRKAG2;IL12B;IGF2BP2;ADIPOR1	.
	cell junction assembly (GO:0034329)	21794	0.249302	0.586276	0	0	1.35919	1.88803	VASP;VMP1;RAMP2;OPHN1;CDH20;PIP5K1C;TLN1;ACTB;RHOA	.
	positive regulation of transferase activity (GO:0051347)	19/137	0.249443	0.586276	0	0	1.21636	1.68895	ARRDC4;RET;CSF1R;GSK3A;HSP90AA1;PARM1;FLT3;INSR;FLT4;ARRDC3;PLK1;LMTK2;MERTK;KLF4;SORL1;UBE2L3;PINK1;MAPK1;ROR2	.
	positive regulation of nucleic acid-templated transcription (GO:1903508)	64/502	0.249495	0.586276	0	0	1.1051	1.53423	RET;ACVRL1;RNF10;SPI1;NCF1;CITED2;HMGB2;MYRFL;GPATCH3;GLI1;ETS2;MED12;IKBKB;KAT8;CAPN3;BTRC;ATXN7L3;ACVR1;IL10;ARHGEF11;ANKRD49;MAP2K2;TESC;RHOG;DNM2;PSRC1;PAX8;DDIT3;IL1B;IRF1;RARA;PPARG;ATF5;PLCB1;PPARD;CREB5;HDAC4;ENY2;DDX5;NOTCH1;MYRF;WBP2;PSEN1;GATA1;SERTAD3;IRAK1;DEAF1;TP53INP2;TNNI2;TBL1X;NFE2;JUN;ZFHX3;FZD4;SS18L1;STAT3;NR1H3;PBX4;KLF4;TADA3;BCL3;SNAI1;NFE2L2;PICALM	.
	regulation of Ras protein signal transduction (GO:0046578)	13/90	0.251354	0.586276	0	0	1.27508	1.76075	GIT2;NOTCH1;APLP2;ARAP3;MYO9B;ARAP1;ADAP1;RASGRP4;ADAP2;OPHN1;SPRY1;RAF1;SMAP2	.
	protein N-linked glycosylation via asparagine (GO:0018279)	16254	0.251519	0.586276	0	0	1.4284	1.97154	DPM2;MCFD2;DPM3;ST3GAL4;ST6GALNAC4;ST3GAL3;ST6GALNAC6	.
	positive regulation of viral process (GO:0048524)	16254	0.251519	0.586276	0	0	1.4284	1.97154	PC;STAU1;GTF2B;CFL1;POLR2J;NELFE;RAB7A	.
	adherens junction organization (GO:0034332)	16254	0.251519	0.586276	0	0	1.4284	1.97154	RAMP2;CADM1;CDH20;CTNND1;CTNNA1;PIP5K1C;NECTIN2	.
	acylglycerol homeostasis (GO:0055090)	44308	0.252284	0.586276	0	0	1.67746	2.3102	SCARB1;IL18;LPL;NR1H3	.
	protein localization to cilium (GO:0061512)	44308	0.252284	0.586276	0	0	1.67746	2.3102	EHD1;BBS9;SNX10;ATP6V1D	.
	regulation of transcription from RNA polymerase III promoter (GO:0006359)	44308	0.252284	0.586276	0	0	1.67746	2.3102	TENM1;PRDX5;BRF2;ELL	.
	phosphatidylglycerol metabolic process (GO:0046471)	44308	0.252284	0.586276	0	0	1.67746	2.3102	PGS1;PLA2G4F;PLA2G4A;CDS2	.
	branched-chain amino acid metabolic process (GO:0009081)	44308	0.252284	0.586276	0	0	1.67746	2.3102	STAT5A;STAT5B;HIBADH;AUH	.
	C21-steroid hormone metabolic process (GO:0008207)	44308	0.252284	0.586276	0	0	1.67746	2.3102	STARD3;STARD3NL;DHRS9;TSPO	.
	viral genome replication (GO:0019079)	44308	0.252284	0.586276	0	0	1.67746	2.3102	GRK2;CTBP2;NFIA;PI4KA	.
	negative regulation of protein polymerization (GO:0032272)	44308	0.252284	0.586276	0	0	1.67746	2.3102	PRKCD;TWF2;HIP1R;EML2	.
	positive regulation of proteolysis involved in cellular protein catabolic process (GO:1903052)	44308	0.252284	0.586276	0	0	1.67746	2.3102	SMURF1;GBA;CLU;CTSC	.
	lipid translocation (GO:0034204)	44308	0.252284	0.586276	0	0	1.67746	2.3102	ATP8B4;ATP8A2;ABCA7;ATP9A	.
	NAD biosynthesis via nicotinamide riboside salvage pathway (GO:0034356)	44270	0.252949	0.586276	0	0	1.88698	2.59378	PNP;NAPRT;PARP16	.
	regulation of mRNA metabolic process (GO:1903311)	44270	0.252949	0.586276	0	0	1.88698	2.59378	SRPK2;SRPK3;CDK11B	.
	fatty acid beta-oxidation using acyl-CoA oxidase (GO:0033540)	44270	0.252949	0.586276	0	0	1.88698	2.59378	SCP2;ACAA1;CRAT	.
	vitamin D metabolic process (GO:0042359)	44270	0.252949	0.586276	0	0	1.88698	2.59378	VDR;CYP3A4;LGMN	.
	phosphatidylethanolamine biosynthetic process (GO:0006646)	44270	0.252949	0.586276	0	0	1.88698	2.59378	PHOSPHO1;LPIN2;LPIN3	.
	endocardial cushion morphogenesis (GO:0003203)	44270	0.252949	0.586276	0	0	1.88698	2.59378	ACVR1;ACVRL1;NOTCH1	.
	positive regulation of glycolytic process (GO:0045821)	44270	0.252949	0.586276	0	0	1.88698	2.59378	PFKFB4;PFKFB3;INSR	.
	negative regulation of platelet-derived growth factor receptor signaling pathway (GO:0010642)	44270	0.252949	0.586276	0	0	1.88698	2.59378	LRP1;HGS;PTPN2	.
	positive regulation of small GTPase mediated signal transduction (GO:0051057)	44270	0.252949	0.586276	0	0	1.88698	2.59378	NOTCH1;SRC;RASGRP4	.
	positive regulation of coenzyme metabolic process (GO:0051197)	44270	0.252949	0.586276	0	0	1.88698	2.59378	PFKFB4;PFKFB3;INSR	.
	G-protein coupled glutamate receptor signaling pathway (GO:0007216)	44270	0.252949	0.586276	0	0	1.88698	2.59378	DAGLA;HOMER3;DAGLB	.
	regulation of mitotic metaphase/anaphase transition (GO:0030071)	44270	0.252949	0.586276	0	0	1.88698	2.59378	NEK6;HECW2;PLK1	.
	regulation of establishment of cell polarity (GO:2000114)	44270	0.252949	0.586276	0	0	1.88698	2.59378	SHTN1;GSN;PTK2B	.
	mesenchyme morphogenesis (GO:0072132)	44270	0.252949	0.586276	0	0	1.88698	2.59378	ACVR1;ACVRL1;NOTCH1	.
	pyrimidine-containing compound metabolic process (GO:0072527)	44270	0.252949	0.586276	0	0	1.88698	2.59378	NT5C3A;SLC25A19;DCK	.
	negative regulation of cellular component movement (GO:0051271)	44270	0.252949	0.586276	0	0	1.88698	2.59378	ACTN1;WAS;CD9	.
	positive regulation of acute inflammatory response (GO:0002675)	44270	0.252949	0.586276	0	0	1.88698	2.59378	IL1B;OSM;FFAR2	.
	neural crest cell differentiation (GO:0014033)	44270	0.252949	0.586276	0	0	1.88698	2.59378	PEF1;NRG1;TAPT1	.
	regulation of macrophage chemotaxis (GO:0010758)	44270	0.252949	0.586276	0	0	1.88698	2.59378	PTK2B;THBS1;CMKLR1	.
	negative regulation of cytokine production involved in immune response (GO:0002719)	44270	0.252949	0.586276	0	0	1.88698	2.59378	IL10;HFE;JAK3	.
	regulation of protein complex disassembly (GO:0043244)	44270	0.252949	0.586276	0	0	1.88698	2.59378	INSR;BNIP3;GBA	.
	regulation of lymphocyte proliferation (GO:0050670)	44270	0.252949	0.586276	0	0	1.88698	2.59378	LGALS3;IL12B;IL27	.
	regulation of T cell mediated cytotoxicity (GO:0001914)	44270	0.252949	0.586276	0	0	1.88698	2.59378	IL23A;IL12B;FADD	.
	regulation of fertilization (GO:0080154)	44270	0.252949	0.586276	0	0	1.88698	2.59378	INTS13;LHFPL2;PLCB1	.
	positive regulation of protein export from nucleus (GO:0046827)	44270	0.252949	0.586276	0	0	1.88698	2.59378	TCF7L2;BAG3;IL1B	.
	sulfate transport (GO:0008272)	44270	0.252949	0.586276	0	0	1.88698	2.59378	SLC26A8;SLC25A10;SLC26A6	.
	inhibition of cysteine-type endopeptidase activity (GO:0097340)	44270	0.252949	0.586276	0	0	1.88698	2.59378	NLRC4;NOL3;NAIP	.
	cellular response to corticosteroid stimulus (GO:0071384)	44270	0.252949	0.586276	0	0	1.88698	2.59378	ZFP36;ANXA1;UBE2L3	.
	selective autophagy (GO:0061912)	44270	0.252949	0.586276	0	0	1.88698	2.59378	BECN1;WDFY3;RAB7A	.
	positive regulation of response to wounding (GO:1903036)	44270	0.252949	0.586276	0	0	1.88698	2.59378	ANXA1;SCARF1;MYLK	.
	phototransduction, visible light (GO:0007603)	44270	0.252949	0.586276	0	0	1.88698	2.59378	GNA11;GNAT1;MAPRE2	.
	transport along microtubule (GO:0010970)	44270	0.252949	0.586276	0	0	1.88698	2.59378	ARHGAP21;COPG2;APBA1	.
	regulation of cyclin-dependent protein serine/threonine kinase activity (GO:0000079)	24746	0.254573	0.589724	0	0	1.32478	1.81253	CDKN2D;CDKN1A;CCND3;CDKN2B;PSRC1;SERTAD1;GADD45A;PLK1;CCNL1;CDK5R1	.
	positive regulation of cellular component organization (GO:0051130)	15/106	0.255637	0.591872	0	0	1.24498	1.69815	PPP1R15A;CD63;CD151;GPX1;LRP1;INSR;BNIP3;PRKCD;GBA;IL1RAP;SPIDR;HYAL1;NEURL1;FLOT1;LDLR	.
	C-terminal protein lipidation (GO:0006501)	27699	0.258638	0.598179	0	0	1.29791	1.7552	BST1;OTOA;VNN1;VNN2;LYPD6B;ALPL;LYPD3;THY1;FOLR2;ATG7;ATG4D	.
	antigen processing and presentation of exogenous peptide antigen via MHC class I, TAP-dependent (GO:0002479)	27699	0.258638	0.598179	0	0	1.29791	1.7552	IKBKB;VAMP8;PSMA6;PSMD6;NCF1;NCF2;HFE;NCF4;CYBA;CD36;FCGR1A	.
	regulation of calcium ion transport (GO:0051924)	19207	0.259458	0.599432	0	0	1.37279	1.85212	CCR1;P2RX4;ORAI1;HOMER3;SRI;PKD2;SLC8B1;MYLK	.
	regulation of cell-matrix adhesion (GO:0001952)	19207	0.259458	0.599432	0	0	1.37279	1.85212	BST1;CDK6;PLAU;PTK2B;CD36;THY1;THBS1;RHOA	.
	regulation of sodium ion transmembrane transporter activity (GO:2000649)	13667	0.260933	0.600912	0	0	1.46119	1.96309	FXYD4;HECW2;GLRX;DMD;FXYD5;SCN2B	.
	protein K63-linked ubiquitination (GO:0070534)	13667	0.260933	0.600912	0	0	1.46119	1.96309	UBE2B;ARIH2;WWP2;UBE2G1;RNF5;TANK	.
	response to steroid hormone (GO:0048545)	13667	0.260933	0.600912	0	0	1.46119	1.96309	WBP2;NR1H3;ADTRP;TFPI;THBS1;UBE2L3	.
	positive regulation of multi-organism process (GO:0043902)	13667	0.260933	0.600912	0	0	1.46119	1.96309	ACOD1;CYBA;LHFPL2;ACVR1B;OPTN;RAB7A	.
	organic cyclic compound biosynthetic process (GO:1901362)	13667	0.260933	0.600912	0	0	1.46119	1.96309	MOCS2;SCP2;GCH1;MOCOS;MOCS1;GPHN	.
	myelination (GO:0042552)	13667	0.260933	0.600912	0	0	1.46119	1.96309	MYRF;MARVELD1;GPC1;PARD3;EPB41L3;MBP	.
	negative regulation of neuron death (GO:1901215)	30651	0.261791	0.602566	0	0	1.27635	1.71057	PINK1;GBA;PPT1;CHMP4B;PTK2B;SOD2;TANK;BTBD10;SORL1;NAIP;CPEB4;LGMN	.
	ubiquitin-dependent protein catabolic process (GO:0006511)	44/341	0.266843	0.613868	0	0	1.11979	1.47934	GSK3A;ANAPC15;ANAPC16;PPP1R11;UBE2D3;UBE2D1;RNF19B;RNF5;UBE2L3;RMND5B;PSMD6;MAEA;OS9;KCTD21;RNF217;UBC;ARIH2;ELOC;TBL1X;BTRC;FBXW5;UBE2B;RNF24;ARRDC1;SMURF1;SIAH1;BTBD11;UBE2G1;WWP2;ARMC8;ABTB2;RNF144B;PSMA6;SPSB2;UBE2W;PINK1;HECW2;DDIT3;KLHL8;TTC3;UBAP1;RBCK1;RNF122;NFE2L2	.
	regulation of MAPK cascade (GO:0043408)	27/203	0.268133	0.616506	0	0	1.15905	1.52563	RET;CSF1R;FLT3;FLT4;PELI2;PAK1;SPRED1;MAPK1;LYN;MAP2K2;DUSP1;INSR;FN1;OSM;LMTK2;TNFRSF1B;MERTK;TNFRSF1A;HGS;IL1B;FAS;PTPN6;LAMTOR1;ROR2;LTBR;TRIB1;CD24	.
	protein O-linked glycosylation (GO:0006493)	16/115	0.268638	0.617011	0	0	1.22064	1.60439	GALNT11;PLOD3;CFP;THBS1;LFNG;DPM2;POFUT2;DPM3;ADAMTSL4;ST3GAL4;GALNTL5;B3GNT3;LARGE1;ST6GALNAC4;ST3GAL3;ADAMTS7	.
	epithelium development (GO:0060429)	16/115	0.268638	0.617011	0	0	1.22064	1.60439	CPT1A;ACADVL;RARG;VDR;ANXA4;PKD2;LGALS3;PAX8;DHRS9;PGK1;RARA;VDAC1;ALDOC;PPARG;JAK2;CTSB	.
	peptidyl-asparagine modification (GO:0018196)	16619	0.270279	0.61849	0	0	1.39073	1.8195	DPM2;MCFD2;DPM3;ST3GAL4;ST6GALNAC4;ST3GAL3;ST6GALNAC6	.
	metal ion homeostasis (GO:0055065)	16619	0.270279	0.61849	0	0	1.39073	1.8195	SELENON;SLC7A8;TMTC2;FAM20A;SLC12A7;SLC8A1;SLC12A8	.
	regulation of protein kinase activity (GO:0045859)	20/147	0.27039	0.61849	0	0	1.18955	1.5558	CDKN1A;CISH;BGN;PRKAG2;GP1BA;THY1;NYX;CAMKK1;PPM1F;EREG;FGR;PREX1;SPRED1;DEPTOR;CHORDC1;PTK2B;SFN;LCP2;TRIB1;SOCS6	.
	negative regulation of secretion by cell (GO:1903531)	44346	0.270428	0.61849	0	0	1.50976	1.97439	VAMP8;SYT4;ANXA1;OSM;STXBP6	.
	fatty-acyl-CoA biosynthetic process (GO:0046949)	44346	0.270428	0.61849	0	0	1.50976	1.97439	ACSL1;ACSL6;PPT1;PPT2;HACD2	.
	protein localization to lysosome (GO:0061462)	44346	0.270428	0.61849	0	0	1.50976	1.97439	SCARB2;HGS;SORL1;LAMTOR5;RAB7A	.
	regulation of developmental growth (GO:0048638)	44346	0.270428	0.61849	0	0	1.50976	1.97439	STAT5A;STAT5B;INSR;PLCB1;DNM2	.
	negative regulation of cell morphogenesis involved in differentiation (GO:0010771)	44346	0.270428	0.61849	0	0	1.50976	1.97439	GDI1;OMG;THY1;ACTN4;RHOA	.
	activation of GTPase activity (GO:0090630)	31017	0.275481	0.620063	0	0	1.25855	1.62257	TBC1D2;TBC1D9B;RALGAPA2;TBC1D7;RHOG;TBC1D8;TBC1D9;TBC1D14;TAX1BP3;TBC1D12;TBC1D22A;TBC1D10B	.
	metanephros development (GO:0001656)	44309	0.279446	0.620063	0	0	1.58908	2.02599	PAX8;BASP1;CTSH;PKD2	.
	membrane assembly (GO:0071709)	44309	0.279446	0.620063	0	0	1.58908	2.02599	ANXA2;FLOT1;FLOT2;STX2	.
	cellular response to ammonium ion (GO:0071242)	44309	0.279446	0.620063	0	0	1.58908	2.02599	GABRB1;CASP7;CASP3;MAPK1	.
	protein localization to Golgi apparatus (GO:0034067)	44309	0.279446	0.620063	0	0	1.58908	2.02599	PAQR3;SORL1;OBSL1;OPTN	.
	response to alkaloid (GO:0043279)	44309	0.279446	0.620063	0	0	1.58908	2.02599	RYR1;CHRNE;HMOX1;MAPK1	.
	negative regulation of axonogenesis (GO:0050771)	44309	0.279446	0.620063	0	0	1.58908	2.02599	GDI1;OMG;THY1;RHOA	.
	divalent inorganic cation homeostasis (GO:0072507)	44309	0.279446	0.620063	0	0	1.58908	2.02599	SELENON;TMTC2;FAM20A;SLC8A1	.
	regulation of release of sequestered calcium ion into cytosol by sarcoplasmic reticulum (GO:0010880)	44309	0.279446	0.620063	0	0	1.58908	2.02599	DMD;SRI;CALM2;SLC8A1	.
	negative regulation of transcription factor import into nucleus (GO:0042992)	44309	0.279446	0.620063	0	0	1.58908	2.02599	NFKBIA;MXI1;PKD2;NFKBIE	.
	positive regulation of ion transmembrane transporter activity (GO:0032414)	44309	0.279446	0.620063	0	0	1.58908	2.02599	ATP1B3;GLRX;DMD;CTSS	.
	negative regulation of axon extension (GO:0030517)	44309	0.279446	0.620063	0	0	1.58908	2.02599	SEMA4A;SEMA7A;SEMA4D;SEMA3C	.
	negative regulation of viral life cycle (GO:1903901)	22525	0.281621	0.620063	0	0	1.30676	1.65592	FCN1;IFITM3;SNX3;SRPK2;IFITM1;GSN;TNIP1;CHMP3;LTF	.
	muscle filament sliding (GO:0030049)	14032	0.281819	0.620063	0	0	1.41544	1.79265	MYL6;TPM4;TPM1;TNNI2;DMD;VIM	.
	actin-myosin filament sliding (GO:0033275)	14032	0.281819	0.620063	0	0	1.41544	1.79265	MYL6;TPM4;TPM1;TNNI2;DMD;VIM	.
	positive regulation of innate immune response (GO:0045089)	14032	0.281819	0.620063	0	0	1.41544	1.79265	RIOK3;NLRC5;LBP;FADD;EREG;TLR2	.
	regulation of ossification (GO:0030278)	14032	0.281819	0.620063	0	0	1.41544	1.79265	ACVR1;DDX5;NOTCH1;CHSY1;BMP2K;KREMEN2	.
	chemical homeostasis (GO:0048878)	14032	0.281819	0.620063	0	0	1.41544	1.79265	VDR;NR1H3;PPARG;ABHD5;USF1;PNPLA2	.
	T cell differentiation (GO:0030217)	14032	0.281819	0.620063	0	0	1.41544	1.79265	LFNG;ANXA1;FCER1G;PIK3CD;FADD;PTPN2	.
	secretory granule organization (GO:0033363)	44236	0.284701	0.620063	0	0	2.15623	2.70891	SRGN;F2RL3	.
	negative regulation of cytokine production involved in inflammatory response (GO:1900016)	44236	0.284701	0.620063	0	0	2.15623	2.70891	MEFV;F2	.
	manganese ion transport (GO:0006828)	44236	0.284701	0.620063	0	0	2.15623	2.70891	TRPC5;SLC11A1	.
	positive regulation of production of molecular mediator of immune response (GO:0002702)	44236	0.284701	0.620063	0	0	2.15623	2.70891	FFAR2;CD244	.
	neuron maturation (GO:0042551)	44236	0.284701	0.620063	0	0	2.15623	2.70891	ANKS1A;SCARF1	.
	cellular response to interleukin-4 (GO:0071353)	44236	0.284701	0.620063	0	0	2.15623	2.70891	DCSTAMP;JAK3	.
	sarcoplasmic reticulum calcium ion transport (GO:0070296)	44236	0.284701	0.620063	0	0	2.15623	2.70891	RYR1;NOL3	.
	regulation of interleukin-1 secretion (GO:0050704)	44236	0.284701	0.620063	0	0	2.15623	2.70891	ORM1;NLRP12	.
	regulation of SNARE complex assembly (GO:0035542)	44236	0.284701	0.620063	0	0	2.15623	2.70891	VPS41;STXBP6	.
	sphingomyelin metabolic process (GO:0006684)	44236	0.284701	0.620063	0	0	2.15623	2.70891	SGMS1;SMPD1	.
	adipose tissue development (GO:0060612)	44236	0.284701	0.620063	0	0	2.15623	2.70891	DGAT2;SH3PXD2B	.
	negative regulation of natural killer cell mediated cytotoxicity (GO:0045953)	44236	0.284701	0.620063	0	0	2.15623	2.70891	SERPINB4;LGALS9	.
	negative regulation of tyrosine phosphorylation of STAT protein (GO:0042532)	44236	0.284701	0.620063	0	0	2.15623	2.70891	SOCS3;PTPN2	.
	positive regulation of immunoglobulin secretion (GO:0051024)	44236	0.284701	0.620063	0	0	2.15623	2.70891	GPI;STX4	.
	maintenance of protein localization in endoplasmic reticulum (GO:0035437)	44236	0.284701	0.620063	0	0	2.15623	2.70891	OS9;TAPT1	.
	response to muscle stretch (GO:0035994)	44236	0.284701	0.620063	0	0	2.15623	2.70891	DMD;SLC8A1	.
	negative regulation of protein exit from endoplasmic reticulum (GO:0070862)	44236	0.284701	0.620063	0	0	2.15623	2.70891	OS9;DERL2	.
	endosome to pigment granule transport (GO:0043485)	44236	0.284701	0.620063	0	0	2.15623	2.70891	RAB32;CD63	.
	heterochromatin organization (GO:0070828)	44236	0.284701	0.620063	0	0	2.15623	2.70891	SNAI1;TNRC18	.
	virion attachment to host cell (GO:0019062)	44236	0.284701	0.620063	0	0	2.15623	2.70891	ACE2;NECTIN2	.
	regulation of skeletal muscle cell differentiation (GO:2001014)	44236	0.284701	0.620063	0	0	2.15623	2.70891	DDX5;GPC1	.
	nucleoside phosphate biosynthetic process (GO:1901293)	44236	0.284701	0.620063	0	0	2.15623	2.70891	AK1;AK4	.
	mitochondrial calcium uptake (GO:0036444)	44236	0.284701	0.620063	0	0	2.15623	2.70891	SMDT1;MICU1	.
	positive regulation of natural killer cell mediated immune response to tumor cell (GO:0002857)	44236	0.284701	0.620063	0	0	2.15623	2.70891	IL12B;NECTIN2	.
	positive regulation of epidermis development (GO:0045684)	44236	0.284701	0.620063	0	0	2.15623	2.70891	NUMA1;SFN	.
	nucleoside triphosphate biosynthetic process (GO:0009142)	44236	0.284701	0.620063	0	0	2.15623	2.70891	AK1;AK4	.
	membrane disruption in other organism (GO:0051673)	44236	0.284701	0.620063	0	0	2.15623	2.70891	GSDMD;LTF	.
	intestinal lipid absorption (GO:0098856)	44236	0.284701	0.620063	0	0	2.15623	2.70891	CD36;LDLR	.
	atrioventricular valve development (GO:0003171)	44236	0.284701	0.620063	0	0	2.15623	2.70891	ACVR1;NOTCH1	.
	regulation of natural killer cell activation (GO:0032814)	44236	0.284701	0.620063	0	0	2.15623	2.70891	IL23A;IL12B	.
	response to interleukin-4 (GO:0070670)	44236	0.284701	0.620063	0	0	2.15623	2.70891	DCSTAMP;JAK3	.
	hexose catabolic process (GO:0019320)	44236	0.284701	0.620063	0	0	2.15623	2.70891	GALE;GALK1	.
	regulation of oxidative phosphorylation (GO:0002082)	44236	0.284701	0.620063	0	0	2.15623	2.70891	PINK1;SLC25A33	.
	regulation of cell communication by electrical coupling involved in cardiac conduction (GO:1901844)	44236	0.284701	0.620063	0	0	2.15623	2.70891	SRI;CALM2	.
	endosome to melanosome transport (GO:0035646)	44236	0.284701	0.620063	0	0	2.15623	2.70891	RAB32;CD63	.
	mitral valve morphogenesis (GO:0003183)	44236	0.284701	0.620063	0	0	2.15623	2.70891	ACVR1;NOTCH1	.
	dynamin family protein polymerization involved in mitochondrial fission (GO:0003374)	44236	0.284701	0.620063	0	0	2.15623	2.70891	DNM3;DNM2	.
	positive regulation of protein homooligomerization (GO:0032464)	44236	0.284701	0.620063	0	0	2.15623	2.70891	BIK;CLU	.
	regulation of oxidative stress-induced cell death (GO:1903201)	44236	0.284701	0.620063	0	0	2.15623	2.70891	PINK1;P4HB	.
	mitochondrial fragmentation involved in apoptotic process (GO:0043653)	44236	0.284701	0.620063	0	0	2.15623	2.70891	ATG3;BNIP3	.
	proton-transporting V-type ATPase complex assembly (GO:0070070)	44236	0.284701	0.620063	0	0	2.15623	2.70891	TCIRG1;ATP6V0A1	.
	cytoskeletal anchoring at plasma membrane (GO:0007016)	44236	0.284701	0.620063	0	0	2.15623	2.70891	EPB41L3;TLN1	.
	regulation of nephron tubule epithelial cell differentiation (GO:0072182)	44236	0.284701	0.620063	0	0	2.15623	2.70891	PAX8;CD24	.
	establishment of epithelial cell apical/basal polarity (GO:0045198)	44236	0.284701	0.620063	0	0	2.15623	2.70891	OPHN1;RHOA	.
	histone phosphorylation (GO:0016572)	44236	0.284701	0.620063	0	0	2.15623	2.70891	PRKCD;NEK11	.
	vitamin transmembrane transport (GO:0035461)	44236	0.284701	0.620063	0	0	2.15623	2.70891	SLC5A6;SCARB1	.
	negative regulation of interleukin-17 production (GO:0032700)	44236	0.284701	0.620063	0	0	2.15623	2.70891	IL12B;TLR4	.
	regulation of immunoglobulin secretion (GO:0051023)	44236	0.284701	0.620063	0	0	2.15623	2.70891	GPI;STX4	.
	negative regulation of NIK/NF-kappaB signaling (GO:1901223)	44236	0.284701	0.620063	0	0	2.15623	2.70891	ADGRG3;ADIPOR1	.
	dynamin family protein polymerization involved in membrane fission (GO:0003373)	44236	0.284701	0.620063	0	0	2.15623	2.70891	DNM3;DNM2	.
	vacuolar proton-transporting V-type ATPase complex assembly (GO:0070072)	44236	0.284701	0.620063	0	0	2.15623	2.70891	TCIRG1;ATP6V0A1	.
	positive regulation of protein sumoylation (GO:0033235)	44236	0.284701	0.620063	0	0	2.15623	2.70891	HDAC4;RASD2	.
	actin filament reorganization (GO:0090527)	44236	0.284701	0.620063	0	0	2.15623	2.70891	GSN;FRY	.
	regulation of organ growth (GO:0046620)	44236	0.284701	0.620063	0	0	2.15623	2.70891	WWC3;SLC6A4	.
	actin crosslink formation (GO:0051764)	44236	0.284701	0.620063	0	0	2.15623	2.70891	LCP1;BAIAP2	.
	long-chain fatty acid biosynthetic process (GO:0042759)	44236	0.284701	0.620063	0	0	2.15623	2.70891	ACOT7;ALOX12	.
	oligosaccharide catabolic process (GO:0009313)	44236	0.284701	0.620063	0	0	2.15623	2.70891	NEU1;MAN2B1	.
	regulation of interferon-gamma secretion (GO:1902713)	44236	0.284701	0.620063	0	0	2.15623	2.70891	LGALS9;CD244	.
	regulation of ER-associated ubiquitin-dependent protein catabolic process (GO:1903069)	44236	0.284701	0.620063	0	0	2.15623	2.70891	NFE2L2;HERPUD1	.
	regulation of mast cell activation (GO:0033003)	44236	0.284701	0.620063	0	0	2.15623	2.70891	LYN;NECTIN2	.
	regulation of endothelial cell differentiation (GO:0045601)	44236	0.284701	0.620063	0	0	2.15623	2.70891	BTG1;XDH	.
	positive regulation of natural killer cell mediated cytotoxicity directed against tumor cell target (GO:0002860)	44236	0.284701	0.620063	0	0	2.15623	2.70891	IL12B;NECTIN2	.
	regulation of osteoblast differentiation (GO:0045667)	25477	0.285077	0.620063	0	0	1.27973	1.60606	ACVR1;IFITM1;DDX5;NOTCH1;CDK6;ATP6AP1;SEMA4D;IL6R;ACVR2B;LTF	.
	response to organic cyclic compound (GO:0014070)	25477	0.285077	0.620063	0	0	1.27973	1.60606	CDKN2D;STAT5B;BGLAP;IL1B;CHRNE;STAT3;IL18;HMOX1;MAPK1;ALPL	.
	peptidyl-threonine dephosphorylation (GO:0035970)	44271	0.286338	0.620063	0	0	1.74173	2.17817	DUSP1;PPM1D;PPM1F	.
	regulation of systemic arterial blood pressure by hormone (GO:0001990)	44271	0.286338	0.620063	0	0	1.74173	2.17817	ACE2;ACE;ECE1	.
	cellular response to dsRNA (GO:0071359)	44271	0.286338	0.620063	0	0	1.74173	2.17817	RALB;RIOK3;FLOT1	.
	negative regulation of immune effector process (GO:0002698)	44271	0.286338	0.620063	0	0	1.74173	2.17817	LGALS3;CD300A;CD55	.
	positive regulation of regulated secretory pathway (GO:1903307)	44271	0.286338	0.620063	0	0	1.74173	2.17817	SYT4;RAB3D;UNC13D	.
	protein deacylation (GO:0035601)	44271	0.286338	0.620063	0	0	1.74173	2.17817	HDAC4;HDAC5;PPT1	.
	negative regulation of striated muscle cell differentiation (GO:0051154)	44271	0.286338	0.620063	0	0	1.74173	2.17817	HDAC4;HDAC5;NOTCH1	.
	negative regulation of transcription regulatory region DNA binding (GO:2000678)	44271	0.286338	0.620063	0	0	1.74173	2.17817	DDIT3;PSEN1;GATA1	.
	positive regulation of macrophage derived foam cell differentiation (GO:0010744)	44271	0.286338	0.620063	0	0	1.74173	2.17817	IL18;LPL;CD36	.
	bone morphogenesis (GO:0060349)	44271	0.286338	0.620063	0	0	1.74173	2.17817	RARG;RARA;LTF	.
	positive regulation of cyclic nucleotide metabolic process (GO:0030801)	44271	0.286338	0.620063	0	0	1.74173	2.17817	RAMP2;RAMP3;CALM2	.
	positive regulation of nitric-oxide synthase activity (GO:0051000)	44271	0.286338	0.620063	0	0	1.74173	2.17817	SCARB1;GCH1;S100A1	.
	regulation of protein homodimerization activity (GO:0043496)	44271	0.286338	0.620063	0	0	1.74173	2.17817	NRG1;TANK;TIRAP	.
	positive regulation of cell migration involved in sprouting angiogenesis (GO:0090050)	44271	0.286338	0.620063	0	0	1.74173	2.17817	MAP3K3;ANXA1;HMOX1	.
	artery development (GO:0060840)	44271	0.286338	0.620063	0	0	1.74173	2.17817	ACVRL1;PKD2;ACVR2B	.
	regulation of necroptotic process (GO:0060544)	44271	0.286338	0.620063	0	0	1.74173	2.17817	UBC;RIPK1;TANK	.
	aorta morphogenesis (GO:0035909)	44271	0.286338	0.620063	0	0	1.74173	2.17817	ACVRL1;LRP1;MYLK	.
	linoleic acid metabolic process (GO:0043651)	44271	0.286338	0.620063	0	0	1.74173	2.17817	CYP2J2;ACSL1;ALOX12	.
	C21-steroid hormone biosynthetic process (GO:0006700)	44271	0.286338	0.620063	0	0	1.74173	2.17817	STARD3;STARD3NL;TSPO	.
	dendritic cell chemotaxis (GO:0002407)	44271	0.286338	0.620063	0	0	1.74173	2.17817	CCR1;CXCR1;CXCR2	.
	positive regulation of cardiac muscle tissue growth (GO:0055023)	44271	0.286338	0.620063	0	0	1.74173	2.17817	NOTCH1;PIM1;GLI1	.
	epithelial cell development (GO:0002064)	44271	0.286338	0.620063	0	0	1.74173	2.17817	ACTA2;RILPL2;RAB25	.
	guanosine-containing compound metabolic process (GO:1901068)	44271	0.286338	0.620063	0	0	1.74173	2.17817	AK3;AK4;RHOQ	.
	positive regulation of protein localization to cell periphery (GO:1904377)	16984	0.289393	0.626051	0	0	1.355	1.68016	RAMP3;LRP1;NUMA1;RHOG;PTPN9;STX4;STX3	.
	regulation of fibroblast proliferation (GO:0048145)	16984	0.289393	0.626051	0	0	1.355	1.68016	CDKN1A;CDK6;CD300A;FTH1;SPHK1;FN1;EREG	.
	modification-dependent protein catabolic process (GO:0019941)	19/141	0.291668	0.630656	0	0	1.17622	1.44926	UBE2B;PPP1R11;ARRDC1;SMURF1;UBE2D3;SIAH1;UBE2D1;UBE2G1;UBE2L3;RNF144B;PINK1;OS9;KCTD21;UBC;RNF217;KLHL8;TTC3;ARIH2;BTRC	.
	regulation of dendritic spine development (GO:0060998)	44347	0.294102	0.633481	0	0	1.45161	1.77652	FXR2;CFL1;NEURL1;PSEN1;CDK5R1	.
[truncated: 2,320 more rows]

## Sheet: purple
Supplementary Table 4: Functional enrichment analysis results for significant highly-correlated modules with clinical traits of BRD (significant terms are highlighted)
BP	Term	Overlap	P-value	Adjusted P-value	Old P-value	Old Adjusted P-value	Odds Ratio	Combined Score	Genes	Kegg	Term	Overlap	P-value	Adjusted P-value	Old P-value	Old Adjusted P-value	Odds Ratio	Combined Score	Genes
	cellular defense response (GO:0006968)	10/56	2.42211e-12	2.27194e-09	0	0	36.2167	968.665	SPN;NCR1;CX3CR1;ITK;GNLY;TRAT1;SH2D1A;PRF1;KIR3DL2;KLRG1	.	Natural killer cell mediated cytotoxicity	10/131	1.30625e-08	2.09e-06	0	0	13.7162	248.998	NCR1;KLRK1;KIR2DS1;LCK;SH2D1A;PRF1;KLRD1;FASLG;KIR3DL1;KIR3DL2
	regulation of immune response (GO:0050776)	14/251	9.05904e-10	4.24869e-07	0	0	10.0853	209.998	ZNF683;CD96;KIR2DS1;SH2D1A;KIR3DL1;KIR3DL2;NCR1;KLRK1;CD40LG;CD8B;CD8A;NCR3LG1;SLAMF7;KLRD1	.	T cell receptor signaling pathway	7/104	4.98415e-06	0.000386886	0	0	11.6966	142.807	ITK;CD40LG;CD8B;CD8A;LCK;PRKCQ;FOS
	regulation of T cell apoptotic process (GO:0070232)	3/10	3.04333e-05	0.00951547	0	0	67.5646	702.67	CCL5;PRKCQ;IDO1	.	Graft-versus-host disease	5/42	7.25412e-06	0.000386886	0	0	21.6151	255.792	PRF1;FASLG;KIR3DL1;KLRD1;KIR3DL2
	positive regulation of T cell activation (GO:0050870)	5/68	7.77478e-05	0.0155546	0	0	12.6779	119.959	CD40LG;CD6;LCK;CCL5;PRKCQ	.	Antigen processing and presentation	6/78	1.12512e-05	0.000450046	0	0	13.414	152.853	CD8B;KIR2DS1;CD8A;KIR3DL1;KLRD1;KIR3DL2
	natural killer cell activation (GO:0030101)	4/36	8.29137e-05	0.0155546	0	0	19.839	186.441	NCR1;KIR3DS1;KLRK1;SLAMF7	.	Th1 and Th2 cell differentiation	6/92	2.90193e-05	0.000928618	0	0	11.2223	117.246	LCK;TBX21;IL2RB;PRKCQ;FOS;RUNX3
	enzyme linked receptor protein signaling pathway (GO:0007167)	6/120	0.00012834	0.0184993	0	0	8.454	75.7549	ITK;CD8B;CD8A;LCK;TXK;PTPRF	.	Th17 cell differentiation	6/107	6.79781e-05	0.00181275	0	0	9.54842	91.6297	LCK;TBX21;IL2RB;RORA;PRKCQ;FOS
	positive regulation of antigen receptor-mediated signaling pathway (GO:0050857)	3/16	0.000138055	0.0184993	0	0	36.37	323.251	PRKCH;TRAT1;LCK	.	Primary immunodeficiency	4/38	0.00010287	0.00235132	0	0	18.6701	171.43	CD40LG;CD8B;CD8A;LCK
	regulation of T cell activation (GO:0050863)	4/44	0.000183615	0.0212416	0	0	15.8648	136.48	LCK;CCL5;TBX21;PRKCQ	.	Chemokine signaling pathway	7/192	0.00025107	0.0050214	0	0	6.10554	50.6136	CX3CR1;ITK;GRK5;CCL5;XCL2;CCR8;ADCY3
	regulation of ERK1 and ERK2 cascade (GO:0070372)	8/247	0.000203811	0.0212416	0	0	5.43089	46.1535	NECAB2;SLC9A3R1;CAMK2N1;CCL5;GPR55;PDGFB;XCL2;SPRY2	.	Cell adhesion molecules	6/148	0.000399706	0.00710588	0	0	6.7774	53.0316	SPN;CD40LG;CD8B;CD6;CD8A;PTPRF
	regulation of platelet activation (GO:0010543)	3/19	0.000235527	0.0215574	0	0	29.5461	246.819	TXK;PDGFB;PRKCQ	.	Viral protein interaction with cytokine and cytokine receptor	5/100	0.000476443	0.00762309	0	0	8.39389	64.2062	CX3CR1;CCL5;IL2RB;XCL2;CCR8
	T cell activation (GO:0042110)	5/88	0.000263653	0.0215574	0	0	9.61329	79.2219	ITK;CD8B;LCK;CD8A;TXK	.	African trypanosomiasis	3/37	0.00173528	0.0250027	0	0	13.8915	88.3022	FASLG;IDO2;IDO1
	positive regulation of T cell migration (GO:2000406)	3/20	0.000275787	0.0215574	0	0	27.8067	227.901	SPN;CCL5;XCL2	.	Allograft rejection	3/38	0.0018752	0.0250027	0	0	13.4939	84.7286	CD40LG;PRF1;FASLG
	activation of phospholipase C activity (GO:0007202)	3/22	0.00036906	0.0266291	0	0	24.8772	196.643	ITK;TXK;GPR55	.	Cytokine-cytokine receptor interaction	7/295	0.00306115	0.0376757	0	0	3.90144	22.5853	CX3CR1;CD40LG;CCL5;IL2RB;XCL2;CCR8;FASLG
	immunological synapse formation (GO:0001771)	2/6	0.000608802	0.0404488	0	0	78.2165	579.117	CD6;PRF1	.	Autoimmune thyroid disease	19419	0.00485427	0.0554774	0	0	9.43857	50.2877	CD40LG;PRF1;FASLG
	release of sequestered calcium ion into cytosol (GO:0051209)	3/27	0.000684666	0.0404488	0	0	19.6895	143.469	TRPM2;LCK;FASLG	.	Yersinia infection	4/137	0.0120039	0.128041	0	0	4.74899	21.0025	CD8B;CD8A;LCK;FOS
	regulation of T cell proliferation (GO:0042129)	4/62	0.000689958	0.0404488	0	0	10.9313	79.5677	SPN;CD40LG;CD6;CCL5	.	Apoptosis	4/142	0.0135414	0.135414	0	0	4.57577	19.685	PRF1;CTSW;FASLG;FOS
	regulation of natural killer cell chemotaxis (GO:2000501)	2/7	0.000848724	0.0442279	0	0	62.5701	442.482	KLRK1;CCL5	.	Circadian rhythm	11355	0.0169883	0.15989	0	0	10.7749	43.9103	BHLHE40;RORA
	positive regulation of lymphocyte apoptotic process (GO:0070230)	2/7	0.000848724	0.0442279	0	0	62.5701	442.482	CCL5;IDO1	.	PD-L1 expression and PD-1 checkpoint pathway in cancer	32568	0.0199096	0.176974	0	0	5.47757	21.4532	LCK;PRKCQ;FOS
	positive regulation of phospholipase C activity (GO:0010863)	3/30	0.000937026	0.0462595	0	0	17.4991	122.018	ITK;TXK;GPR55	.	Rheumatoid arthritis	34029	0.022334	0.188076	0	0	5.23307	19.8943	CCL5;ATP6V0A4;FOS
	regulation of neuron death (GO:1901214)	26390	0.00121089	0.0502555	0	0	9.31906	62.5905	RILPL1;CCL5;FAIM2;FOS	.	Choline metabolism in cancer	35855	0.025581	0.19311	0	0	4.95639	18.1697	PDGFB;FOS;RALGDS
	inflammatory response (GO:0006954)	7/252	0.00125918	0.0502555	0	0	4.59625	30.6905	AFAP1L2;CD40LG;CD6;CCL5;XCL2;FOS;KLRG1	.	Inflammatory mediator regulation of TRP channels	35855	0.025581	0.19311	0	0	4.95639	18.1697	PRKCH;ADCY3;PRKCQ
	negative regulation of lymphocyte apoptotic process (GO:0070229)	44236	0.0014427	0.0502555	0	0	44.6884	292.318	CCL5;PRKCQ	.	Chagas disease	3/102	0.0283515	0.19311	0	0	4.75517	16.943	CCL5;FASLG;FOS
	negative regulation of T cell apoptotic process (GO:0070233)	44236	0.0014427	0.0502555	0	0	44.6884	292.318	CCL5;PRKCQ	.	NF-kappa B signaling pathway	3/104	0.0297942	0.19311	0	0	4.66054	16.3745	CD40LG;LCK;PRKCQ
	indolalkylamine catabolic process (GO:0046218)	44236	0.0014427	0.0502555	0	0	44.6884	292.318	IDO2;IDO1	.	Tryptophan metabolism	15373	0.0300455	0.19311	0	0	7.80748	27.3656	IDO2;IDO1
	regulation of homotypic cell-cell adhesion (GO:0034110)	44236	0.0014427	0.0502555	0	0	44.6884	292.318	CCL5;PRKCQ	.	Parathyroid hormone synthesis, secretion and action	3/106	0.0312752	0.19311	0	0	4.56958	15.8333	SLC9A3R1;ADCY3;FOS
	positive regulation of T cell chemotaxis (GO:0010820)	44236	0.0014427	0.0502555	0	0	44.6884	292.318	CCL5;XCL2	.	Type I diabetes mellitus	15738	0.0313804	0.19311	0	0	7.61667	26.3657	PRF1;FASLG
	peptidyl-tyrosine phosphorylation (GO:0018108)	28946	0.00170822	0.0502555	0	0	8.44629	53.8223	ITK;LCK;TXK;PDGFB	.	Vibrio cholerae infection	18295	0.041352	0.236297	0	0	6.50361	20.7181	ADCY3;ATP6V0A4
	positive regulation of T cell receptor signaling pathway (GO:0050862)	44237	0.00179577	0.0502555	0	0	39.1004	247.205	LCK;TRAT1	.	Malaria	18295	0.041352	0.236297	0	0	6.50361	20.7181	KLRK1;CD40LG
	positive regulation of smooth muscle cell migration (GO:0014911)	44237	0.00179577	0.0502555	0	0	39.1004	247.205	CCL5;PDGFB	.	Glycosaminoglycan biosynthesis	19391	0.045943	0.253478	0	0	6.12012	18.8521	B3GNT7;CHST1
	tryptophan metabolic process (GO:0006568)	44237	0.00179577	0.0502555	0	0	39.1004	247.205	IDO2;IDO1	.	Lipid and atherosclerosis	4/215	0.0506952	0.270375	0	0	2.98161	8.89094	CD40LG;CCL5;FASLG;FOS
	positive regulation of T cell apoptotic process (GO:0070234)	44237	0.00179577	0.0502555	0	0	39.1004	247.205	CCL5;IDO1	.	Human T-cell leukemia virus 1 infection	4/219	0.0535637	0.274618	0	0	2.92554	8.56273	LCK;IL2RB;ADCY3;FOS
	tryptophan catabolic process (GO:0006569)	44237	0.00179577	0.0502555	0	0	39.1004	247.205	IDO2;IDO1	.	Vascular smooth muscle contraction	3/133	0.0549236	0.274618	0	0	3.61557	10.4917	PRKCH;ADCY3;PRKCQ
	regulation of T cell chemotaxis (GO:0010819)	44237	0.00179577	0.0502555	0	0	39.1004	247.205	CCL5;XCL2	.	Viral myocarditis	21947	0.0573324	0.277975	0	0	5.37958	15.3796	CD40LG;PRF1
	cellular response to organic cyclic compound (GO:0071407)	5/135	0.00183449	0.0502555	0	0	6.12314	38.5818	TRPM2;CCL5;PDGFB;ADCY3;RORA	.	Measles	3/139	0.0610702	0.287389	0	0	3.45501	9.65927	IL2RB;FASLG;FOS
	T cell differentiation (GO:0030217)	13940	0.0018752	0.0502555	0	0	13.4939	84.7286	LCK;CD8A;TXK	.	Ras signaling pathway	4/232	0.0634836	0.290211	0	0	2.75691	7.60074	PDGFB;FASLG;RASAL3;RALGDS
	positive regulation of ERK1 and ERK2 cascade (GO:0070374)	6/201	0.00195491	0.0509364	0	0	4.92208	30.701	NECAB2;CCL5;GPR55;PDGFB;XCL2;SPRY2	.	Inflammatory bowel disease	23774	0.0660023	0.293344	0	0	4.95138	13.4582	TBX21;RORA
	negative regulation of ERK1 and ERK2 cascade (GO:0070373)	14671	0.00217569	0.0512517	0	0	12.7632	78.2436	SLC9A3R1;CAMK2N1;SPRY2	.	Phospholipase D signaling pathway	3/148	0.0708635	0.306437	0	0	3.23908	8.57385	PDGFB;ADCY3;RALGDS
	protein kinase C signaling (GO:0070528)	44238	0.00218557	0.0512517	0	0	34.7542	212.9	ADGRG1;PDGFB	.	Epithelial cell signaling in Helicobacter pylori infection	25600	0.075077	0.316114	0	0	4.58615	11.8747	CCL5;ATP6V0A4
	positive regulation of endothelial cell apoptotic process (GO:2000353)	44238	0.00218557	0.0512517	0	0	34.7542	212.9	CD40LG;FASLG	.	Oxytocin signaling pathway	3/154	0.0777609	0.319019	0	0	3.10943	7.94185	TRPM2;ADCY3;FOS
	lymphocyte mediated immunity (GO:0002449)	44238	0.00218557	0.0512517	0	0	34.7542	212.9	CD8A;KLRD1	.	Endocytosis	4/252	0.0804919	0.321968	0	0	2.532	6.37962	GRK5;DNAJC6;MVB12B;IL2RB
	monocyte chemotaxis (GO:0002548)	15036	0.00233648	0.053454	0	0	12.4267	75.2947	CCL5;PDGFB;XCL2	.	Selenocompound metabolism	44213	0.10421	0.40552	0	0	9.69482	21.9234	SCLY
	peptidyl-tyrosine autophosphorylation (GO:0038083)	16497	0.00305247	0.065521	0	0	11.2409	65.1053	ITK;LCK;TXK	.	Colorectal cancer	31444	0.106449	0.40552	0	0	3.7096	8.30983	FOS;RALGDS
	positive regulation of cytokine production (GO:0001819)	6/220	0.00306503	0.065521	0	0	4.48074	25.9332	AFAP1L2;CD40LG;CD6;TXK;RORA;PRKCQ	.	Gap junction	32174	0.110586	0.411484	0	0	3.62296	7.97761	PDGFB;ADCY3
	regulation of lymphocyte activation (GO:0051249)	44240	0.00307348	0.065521	0	0	28.4324	164.48	LCK;CCL5	.	Axon guidance	3/182	0.113517	0.412791	0	0	2.61931	5.6991	RGS3;PLXNA1;SRGAP3
	regulation of lymphocyte differentiation (GO:0045619)	44241	0.00357063	0.0744278	0	0	26.0617	146.858	ZNF683;TBX21	.	Morphine addiction	33270	0.116871	0.41554	0	0	3.50031	7.51407	GRK5;ADCY3
	negative regulation of platelet-derived growth factor receptor signaling pathway (GO:0010642)	44242	0.00410262	0.0771788	0	0	24.0557	132.213	SLC9A3R1;PDGFB	.	Kaposi sarcoma-associated herpesvirus infection	3/193	0.129006	0.422953	0	0	2.46629	5.05071	PDGFB;CCR8;FOS
	positive regulation of interleukin-4 production (GO:0032753)	44242	0.00410262	0.0771788	0	0	24.0557	132.213	CD40LG;PRKCQ	.	Pathways in cancer	6/531	0.129239	0.422953	0	0	1.79754	3.67793	IL2RB;PDGFB;ADCY3;FASLG;FOS;RALGDS
	regulation of interleukin-4 production (GO:0032673)	44242	0.00410262	0.0771788	0	0	24.0557	132.213	CD40LG;PRKCQ	.	Circadian entrainment	35462	0.129698	0.422953	0	0	3.27824	6.69596	ADCY3;FOS
	regulation of protein kinase B signaling (GO:0051896)	5/163	0.00413527	0.0771788	0	0	5.03088	27.6105	SLC9A3R1;LCK;TRAT1;PDGFB;SPRY2	.	Arginine biosynthesis	44218	0.132755	0.422953	0	0	7.38467	14.9115	GPT
	T cell receptor signaling pathway (GO:0050852)	5/163	0.00413527	0.0771788	0	0	5.03088	27.6105	ITK;LCK;TRAT1;TXK;PRKCQ	.	Hematopoietic cell lineage	36192	0.134045	0.422953	0	0	3.21033	6.45142	CD8B;CD8A
	transmembrane receptor protein tyrosine kinase signaling pathway (GO:0007169)	8/396	0.00419629	0.0771788	0	0	3.31993	18.1718	ITK;CD8B;CD8A;LCK;TXK;SH2D2A;PDGFB;ATP6V0A4	.	Pathogenic Escherichia coli infection	3/197	0.134816	0.422953	0	0	2.41495	4.83918	SLC9A3R1;FASLG;FOS
	regulation of cell migration (GO:0030334)	7/316	0.00445682	0.0796276	0	0	3.63239	19.6633	ABI3;CCL5;PDGFB;PLXNA1;SPRY2;SRGAP3;RHOF	.	Toll-like receptor signaling pathway	2/104	0.145051	0.44631	0	0	3.05218	5.89276	CCL5;FOS
	positive regulation of epithelial cell apoptotic process (GO:1904037)	44243	0.00466899	0.0796276	0	0	22.3363	119.875	CD40LG;FASLG	.	Insulin resistance	2/108	0.153987	0.454465	0	0	2.93641	5.49369	PRKCQ;PTPRF
	lipopolysaccharide-mediated signaling pathway (GO:0031663)	44243	0.00466899	0.0796276	0	0	22.3363	119.875	CD6;CCL5	.	Rap1 signaling pathway	3/210	0.1543	0.454465	0	0	2.26179	4.22696	PDGFB;ADCY3;RALGDS
	dendritic cell chemotaxis (GO:0002407)	44243	0.00466899	0.0796276	0	0	22.3363	119.875	TRPM2;CCL5	.	Collecting duct acid secretion	44223	0.160398	0.454465	0	0	5.96304	10.9129	ATP6V0A4
	positive regulation of lymphocyte migration (GO:2000403)	44244	0.00526928	0.086712	0	0	20.8462	109.356	SPN;CCL5	.	TNF signaling pathway	2/112	0.163028	0.454465	0	0	2.82906	5.13145	CCL5;FOS
	regulation of T cell migration (GO:2000404)	44244	0.00526928	0.086712	0	0	20.8462	109.356	SPN;CCL5	.	Cholinergic synapse	2/113	0.165303	0.454465	0	0	2.80343	5.04611	ADCY3;FOS
	regulation of smooth muscle cell migration (GO:0014910)	44245	0.00590304	0.0954663	0	0	19.5423	100.297	CCL5;PDGFB	.	Human papillomavirus infection	4/331	0.166066	0.454465	0	0	1.91256	3.43375	SLC9A3R1;ATP6V0A4;FASLG;OASL
	regulation of epidermal growth factor receptor signaling pathway (GO:0042058)	21245	0.00624646	0.0993081	0	0	8.57835	43.5415	AFAP1L2;MVB12B;SPRY2	.	Leukocyte transendothelial migration	2/114	0.167584	0.454465	0	0	2.77826	4.96273	ITK;TXK
	positive regulation of pri-miRNA transcription from RNA polymerase II promoter (GO:1902895)	44246	0.0065698	0.102708	0	0	18.3918	92.424	PDGFB;FOS	.	Human cytomegalovirus infection	3/225	0.177797	0.469372	0	0	2.10736	3.63964	CCL5;ADCY3;FASLG
	positive regulation of T cell proliferation (GO:0042102)	22341	0.00718462	0.109975	0	0	8.13342	40.145	CD40LG;CD6;CCL5	.	Growth hormone synthesis, secretion and action	2/119	0.179067	0.469372	0	0	2.65886	4.57323	ADCY3;FOS
	aromatic amino acid family catabolic process (GO:0009074)	44247	0.00726914	0.109975	0	0	17.3692	85.528	IDO2;IDO1	.	Asthma	44227	0.181882	0.469372	0	0	5.16693	8.80651	CD40LG
	regulation of GTPase activity (GO:0043087)	5/188	0.00749681	0.111619	0	0	4.33809	21.2275	KLRK1;RGS1;CCL5;XCL2;PLXNA1	.	Osteoclast differentiation	2/127	0.197676	0.498132	0	0	2.48769	4.03285	LCK;FOS
	negative regulation of cellular process (GO:0048523)	9/534	0.00781708	0.114569	0	0	2.76371	13.408	SPN;SLC9A3R1;ADGRG1;CAMK2N1;BHLHE40;PLXNA1;RUNX3;TP53I11;HOPX	.	Lysosome	2/128	0.200019	0.498132	0	0	2.46782	3.97156	ATP6V0A4;CTSW
	positive regulation of leukocyte cell-cell adhesion (GO:1903039)	44248	0.00800061	0.115455	0	0	16.4542	79.4448	LCK;PRKCQ	.	Relaxin signaling pathway	2/129	0.202366	0.498132	0	0	2.44826	3.91153	ADCY3;FOS
	regulation of natural killer cell mediated cytotoxicity (GO:0042269)	44249	0.00876377	0.124552	0	0	15.6307	74.0447	NCR1;KLRK1	.	Alanine, aspartate and glutamate metabolism	13516	0.213088	0.516577	0	0	4.30447	6.65493	GPT
	positive regulation of protein kinase B signaling (GO:0051897)	4/127	0.00927657	0.129872	0	0	5.13769	24.0457	LCK;TRAT1;PDGFB;SPRY2	.	Estrogen signaling pathway	2/137	0.221245	0.528345	0	0	2.30225	3.47291	ADCY3;FOS
	eosinophil migration (GO:0072677)	44251	0.0103834	0.139138	0	0	14.2083	64.8971	CCL5;XCL2	.	Fluid shear stress and atherosclerosis	2/139	0.225988	0.531737	0	0	2.26841	3.37374	PDGFB;FOS
	negative regulation of sequestering of calcium ion (GO:0051283)	44251	0.0103834	0.139138	0	0	14.2083	64.8971	TRPM2;LCK	.	Vasopressin-regulated water reabsorption	16072	0.248005	0.575085	0	0	3.60247	5.02294	ADCY3
	eosinophil chemotaxis (GO:0048245)	44251	0.0103834	0.139138	0	0	14.2083	64.8971	CCL5;XCL2	.	Adrenergic signaling in cardiomyocytes	2/150	0.252191	0.576435	0	0	2.09864	2.89102	ADCY3;SCN1B
	positive regulation of lymphocyte proliferation (GO:0050671)	25993	0.0108912	0.141477	0	0	6.93382	31.3395	CD40LG;CD6;CCL5	.	Non-alcoholic fatty liver disease	2/155	0.264135	0.593918	0	0	2.02954	2.70191	FASLG;FOS
	positive regulation of MAPK cascade (GO:0043410)	6/289	0.0112037	0.141477	0	0	3.37637	15.165	NECAB2;CCL5;GPR55;PDGFB;XCL2;SPRY2	.	Intestinal immune network for IgA production	17533	0.267263	0.593918	0	0	3.29521	4.3481	CD40LG
	positive regulation of Rho protein signal transduction (GO:0035025)	44252	0.0112391	0.141477	0	0	13.5899	60.9962	ADGRG1;GPR55	.	Hepatitis B	2/162	0.280861	0.600288	0	0	1.94006	2.46367	FASLG;FOS
	Rho protein signal transduction (GO:0007266)	26359	0.0113121	0.141477	0	0	6.83299	30.6246	ADGRG1;ARHGEF3;RHOF	.	JAK-STAT signaling pathway	2/162	0.280861	0.600288	0	0	1.94006	2.46367	IL2RB;PDGFB
	negative regulation of cell cycle (GO:0045786)	26359	0.0113121	0.141477	0	0	6.83299	30.6246	SLC9A3R1;CAMK2N1;RUNX3	.	Ovarian steroidogenesis	18629	0.281385	0.600288	0	0	3.09703	3.92713	ADCY3
	regulation of pri-miRNA transcription from RNA polymerase II promoter (GO:1902893)	44253	0.0121247	0.146494	0	0	13.023	57.464	PDGFB;FOS	.	MAPK signaling pathway	3/294	0.294962	0.620972	0	0	1.60203	1.95593	PDGFB;FASLG;FOS
	regulation of T cell receptor signaling pathway (GO:0050856)	44253	0.0121247	0.146494	0	0	13.023	57.464	TRAT1;LCK	.	Regulation of lipolysis in adipocytes	20090	0.299794	0.622949	0	0	2.86704	3.45381	ADCY3
	regulation of G-protein coupled receptor protein signaling pathway (GO:0008277)	27089	0.0121818	0.146494	0	0	6.63984	29.2672	RGS3;GRK5;CCL5	.	Influenza A	2/172	0.3047	0.625027	0	0	1.82501	2.16889	CCL5;FASLG
	positive regulation of intracellular signal transduction (GO:1902533)	8/479	0.0125409	0.14792	0	0	2.72324	11.9244	SLC9A3R1;LCK;SLC20A1;TRAT1;CCL5;PDGFB;SPRY2;FASLG	.	VEGF signaling pathway	21551	0.317736	0.643515	0	0	2.66878	3.05985	SH2D2A
	regulation of small GTPase mediated signal transduction (GO:0051056)	4/140	0.0129121	0.14792	0	0	4.64353	20.1974	TAGAP;ARHGEF3;SRGAP3;RHOF	.	NOD-like receptor signaling pathway	2/181	0.326038	0.649834	0	0	1.73246	1.94164	TRPM2;CCL5
	leukocyte cell-cell adhesion (GO:0007159)	44254	0.0130399	0.14792	0	0	12.5014	54.2529	CD40LG;CCL5	.	Cytosolic DNA-sensing pathway	23012	0.335221	0.649834	0	0	2.49609	2.72814	CCL5
	negative regulation of small GTPase mediated signal transduction (GO:0051058)	44254	0.0130399	0.14792	0	0	12.5014	54.2529	SPRY2;RASAL3	.	Cortisol synthesis and secretion	23743	0.343796	0.649834	0	0	2.41785	2.58155	ADCY3
	hemopoiesis (GO:0030097)	27820	0.0130889	0.14792	0	0	6.45727	27.9987	TAL1;LCK;RUNX3	.	Adipocytokine signaling pathway	25204	0.360618	0.649834	0	0	2.27516	2.32052	PRKCQ
	regulation of defense response to virus by virus (GO:0050690)	44255	0.0139843	0.156158	0	0	12.02	51.3232	CD8B;LCK	.	Amphetamine addiction	25204	0.360618	0.649834	0	0	2.27516	2.32052	FOS
	Ras protein signal transduction (GO:0007265)	5/223	0.0148769	0.160058	0	0	3.63514	15.2965	ADGRG1;ARHGEF3;RHOF;RALGDS;SAMD3	.	Renal cell carcinoma	25204	0.360618	0.649834	0	0	2.27516	2.32052	PDGFB
	keratan sulfate biosynthetic process (GO:0018146)	47150	0.0149574	0.160058	0	0	11.5742	48.6412	B3GNT7;CHST1	.	Prolactin signaling pathway	25569	0.364757	0.649834	0	0	2.24207	2.26119	FOS
	regulation of phosphatidylinositol 3-kinase signaling (GO:0014066)	29281	0.0150161	0.160058	0	0	6.12059	25.6981	SLC9A3R1;CCL5;PDGFB	.	Adherens junction	25934	0.368868	0.649834	0	0	2.20993	2.204	PTPRF
	negative regulation of MAPK cascade (GO:0043409)	29281	0.0150161	0.160058	0	0	6.12059	25.6981	SLC9A3R1;CAMK2N1;SPRY2	.	Melanoma	26299	0.372954	0.649834	0	0	2.1787	2.14885	PDGFB
	positive regulation of nucleic acid-templated transcription (GO:1903508)	8/502	0.0162067	0.170808	0	0	2.59337	10.6907	EOMES;AFAP1L2;TAL1;TBX21;PDGFB;RORA;FOS;RUNX3	.	Inositol phosphate metabolism	26665	0.377013	0.649834	0	0	2.14833	2.09564	INPP5E
	negative regulation of extrinsic apoptotic signaling pathway via death domain receptors (GO:1902042)	11355	0.0169883	0.177055	0	0	10.7749	43.9103	FAIM2;FASLG	.	Thyroid hormone synthesis	27395	0.385053	0.649834	0	0	2.09005	1.9947	ADCY3
	positive regulation of cytokine-mediated signaling pathway (GO:0001961)	12086	0.0191293	0.190886	0	0	10.0787	39.8769	GFI1;TXK	.	Glioma	27395	0.385053	0.649834	0	0	2.09005	1.9947	PDGFB
	regulation of T cell differentiation (GO:0045580)	12086	0.0191293	0.190886	0	0	10.0787	39.8769	ZNF683;TBX21	.	Gastric acid secretion	27760	0.389034	0.649834	0	0	2.06208	1.94679	ADCY3
	positive regulation of calcium ion transport (GO:0051928)	12086	0.0191293	0.190886	0	0	10.0787	39.8769	CCL5;PDGFB	.	Pancreatic cancer	27760	0.389034	0.649834	0	0	2.06208	1.94679	RALGDS
	positive regulation of intrinsic apoptotic signaling pathway (GO:2001244)	12086	0.0191293	0.190886	0	0	10.0787	39.8769	SLC9A3R1;LCK	.	Pertussis	27760	0.389034	0.649834	0	0	2.06208	1.94679	FOS
	keratan sulfate metabolic process (GO:0042339)	12451	0.0202402	0.199845	0	0	9.76329	38.0776	B3GNT7;CHST1	.	Leishmaniasis	28126	0.39299	0.649834	0	0	2.03485	1.90049	FOS
	cellular response to lipopolysaccharide (GO:0071222)	33298	0.0211026	0.202622	0	0	5.35254	20.652	CD6;GFI1;CCL5	.	Synaptic vesicle cycle	28491	0.39692	0.649834	0	0	2.00832	1.85573	ATP6V0A4
	regulation of endothelial cell apoptotic process (GO:2000351)	12816	0.0213775	0.202622	0	0	9.46695	36.4044	CD40LG;FASLG	.	Human immunodeficiency virus 1 infection	2/212	0.397946	0.649834	0	0	1.47439	1.35856	FASLG;FOS
	actin filament bundle organization (GO:0061572)	12816	0.0213775	0.202622	0	0	9.46695	36.4044	LIMA1;RHOF	.	PI3K-Akt signaling pathway	3/354	0.400426	0.649834	0	0	1.32411	1.21186	IL2RB;PDGFB;FASLG
	cytokine-mediated signaling pathway (GO:0019221)	9/633	0.0215482	0.202622	0	0	2.31334	8.87736	CD40LG;CCL5;IL2RB;PDGFB;XCL2;RORA;FASLG;FOS;OASL	.	cAMP signaling pathway	2/216	0.406985	0.649834	0	0	1.44654	1.30041	ADCY3;FOS
	regulation of cell proliferation (GO:0042127)	10/740	0.0216015	0.202622	0	0	2.20341	8.45005	SLC9A3R1;ITK;ADGRG1;GRK5;LCK;CAMK2N1;TXK;BHLHE40;PDGFB;TP53I11	.	B cell receptor signaling pathway	29587	0.40856	0.649834	0	0	1.93271	1.73	FOS
	calcium ion transmembrane import into cytosol (GO:0097553)	13181	0.0225407	0.208022	0	0	9.18805	34.8451	TRPM2;LCK	.	Taste transduction	31413	0.427467	0.649834	0	0	1.81857	1.54556	KCNK5
	regulation of regulated secretory pathway (GO:1903305)	13547	0.0237296	0.208022	0	0	8.92508	33.389	SYT11;SYTL2	.	Insulin secretion	31413	0.427467	0.649834	0	0	1.81857	1.54556	ADCY3
	negative regulation of Ras protein signal transduction (GO:0046580)	13547	0.0237296	0.208022	0	0	8.92508	33.389	SPRY2;RASAL3	.	GABAergic synapse	32509	0.438522	0.649834	0	0	1.7563	1.4478	ADCY3
	actin filament bundle assembly (GO:0051017)	13547	0.0237296	0.208022	0	0	8.92508	33.389	LIMA1;RHOF	.	Bile secretion	32874	0.44216	0.649834	0	0	1.73648	1.41711	ADCY3
	positive regulation of smooth muscle cell proliferation (GO:0048661)	13547	0.0237296	0.208022	0	0	8.92508	33.389	CCL5;PDGFB	.	Thermogenesis	2/232	0.442467	0.649834	0	0	1.34481	1.09655	DPF3;ADCY3
	regulation of sodium ion transmembrane transporter activity (GO:2000649)	13547	0.0237296	0.208022	0	0	8.92508	33.389	SLC9A3R1;SCN1B	.	Salivary secretion	33970	0.452933	0.649834	0	0	1.6796	1.33026	ADCY3
	positive regulation of multi-organism process (GO:0043902)	13547	0.0237296	0.208022	0	0	8.92508	33.389	MVB12B;PRF1	.	GnRH signaling pathway	33970	0.452933	0.649834	0	0	1.6796	1.33026	ADCY3
	antigen receptor-mediated signaling pathway (GO:0050851)	5/257	0.0256493	0.221256	0	0	3.13924	11.4998	ITK;LCK;TRAT1;TXK;PRKCQ	.	IL-17 signaling pathway	34335	0.456478	0.649834	0	0	1.66146	1.30294	FOS
	regulation of extrinsic apoptotic signaling pathway via death domain receptors (GO:1902041)	14277	0.0261828	0.221256	0	0	8.4418	30.7505	FAIM2;FASLG	.	Chemical carcinogenesis	2/239	0.457626	0.649834	0	0	1.30463	1.01983	ADCY3;FOS
	regulation of plasma membrane bounded cell projection assembly (GO:0120032)	14277	0.0261828	0.221256	0	0	8.4418	30.7505	TRPM2;IFT140	.	Calcium signaling pathway	2/240	0.459772	0.649834	0	0	1.29908	1.00942	PDGFB;ADCY3
	alpha-amino acid catabolic process (GO:1901606)	14277	0.0261828	0.221256	0	0	8.4418	30.7505	IDO2;IDO1	.	Dilated cardiomyopathy	35065	0.4635	0.649834	0	0	1.62632	1.25055	ADCY3
	protein autophosphorylation (GO:0046777)	4/175	0.0268176	0.223954	0	0	3.68655	13.3405	ITK;GRK5;LCK;TXK	.	Phosphatidylinositol signaling system	35431	0.466977	0.649834	0	0	1.60929	1.22544	INPP5E
	positive regulation of Ras protein signal transduction (GO:0046579)	14642	0.0274463	0.223954	0	0	8.21923	29.5524	ADGRG1;GPR55	.	Prostate cancer	35431	0.466977	0.649834	0	0	1.60929	1.22544	PDGFB
	positive regulation of gene expression (GO:0010628)	10/771	0.0276595	0.223954	0	0	2.11023	7.57104	EOMES;AFAP1L2;TAL1;CAMK2N1;TBX21;PDGFB;SPRY2;RORA;FOS;RUNX3	.	Aldosterone synthesis and secretion	35796	0.470432	0.649834	0	0	1.59262	1.201	ADCY3
	cellular response to cytokine stimulus (GO:0071345)	7/456	0.0285154	0.223954	0	0	2.48191	8.82893	CCL5;IL2RB;XCL2;RORA;FASLG;FOS;PTPN4	.	Shigellosis	2/246	0.472547	0.649834	0	0	1.26675	0.949577	CCL5;PRKCQ
	negative regulation of cell projection organization (GO:0031345)	15008	0.028734	0.223954	0	0	8.00808	28.4261	GFI1;SPRY2	.	Progesterone-mediated oocyte maturation	1/100	0.477275	0.649834	0	0	1.56029	1.15409	ADCY3
	B cell receptor signaling pathway (GO:0050853)	3/104	0.0297942	0.223954	0	0	4.66054	16.3745	ITK;LCK;TXK	.	Melanogenesis	1/101	0.480664	0.649834	0	0	1.54461	1.13156	ADCY3
	negative regulation of transcription from RNA polymerase II promoter (GO:0000122)	8/565	0.0301391	0.223954	0	0	2.29256	8.02841	EOMES;CBX4;GFI1;TBX21;BHLHE40;PDGFB;FASLG;RUNX3	.	Longevity regulating pathway	1/102	0.48403	0.649834	0	0	1.52924	1.10963	ADCY3
	negative regulation of cell proliferation (GO:0008285)	6/363	0.0304137	0.223954	0	0	2.66639	9.31335	SLC9A3R1;ADGRG1;CAMK2N1;BHLHE40;RUNX3;TP53I11	.	Pancreatic secretion	1/102	0.48403	0.649834	0	0	1.52924	1.10963	ADCY3
	lymphocyte chemotaxis (GO:0048247)	16103	0.0327384	0.223954	0	0	7.43495	25.4216	CCL5;XCL2	.	Protein digestion and absorption	1/103	0.487375	0.649834	0	0	1.51417	1.08827	KCNK5
	regulation of smooth muscle cell proliferation (GO:0048660)	16103	0.0327384	0.223954	0	0	7.43495	25.4216	CCL5;PDGFB	.	Toxoplasmosis	1/112	0.516529	0.683013	0	0	1.39077	0.918774	CD40LG
	negative regulation of hydrolase activity (GO:0051346)	3/108	0.0327942	0.223954	0	0	4.48209	15.3175	KLRK1;PLEKHF1;SYTL2	.	Glutamatergic synapse	1/114	0.522781	0.685614	0	0	1.36601	0.885987	ADCY3
	protein phosphorylation (GO:0006468)	7/470	0.0328134	0.223954	0	0	2.40513	8.21812	PRKCH;GRK5;LCK;TXK;PDGFB;PRKCQ;RUNX3	.	Sphingolipid signaling pathway	1/119	0.538061	0.694272	0	0	1.3078	0.810552	S1PR5
	regulation of cell motility (GO:2000145)	3/109	0.033568	0.223954	0	0	4.43958	15.0687	ABI3;PLXNA1;RHOF	.	Neurotrophin signaling pathway	1/119	0.538061	0.694272	0	0	1.3078	0.810552	FASLG
	positive regulation of ion transport (GO:0043270)	16834	0.0355223	0.223954	0	0	7.09628	23.6845	CCL5;SCN1B	.	Platelet activation	1/124	0.552856	0.703473	0	0	1.25432	0.743382	ADCY3
[truncated: 813 more rows]

## Sheet: blue
Supplementary Table 4: Functional enrichment analysis results for significant highly-correlated modules with clinical traits of BRD (significant terms are highlighted)
[truncated: 3,508 more rows]

[truncated: 1 more sheets: brown]
