# Supplementary material for: Integrated Network Analysis to Identify Key Modules and Potential Hub Genes Involved in Bovine Respiratory Disease: A Systems Biology Approach
Source: Front Genet. 2021 Oct 18;12:753839. doi: 10.3389/fgene.2021.753839 (PMC8559434; doi:10.3389/fgene.2021.753839)
Supplement: Supplementary file 10 [file Table12.xlsx]

## Sheet: darkred
Supplementary Table 12: Complete List of transcription factors for highly, semi, and non-preserved modules
Gene_id	Symbol
ENSBTAG00000001385	ZSCAN2
ENSBTAG00000005478	PATZ1
ENSBTAG00000006754	DBP
ENSBTAG00000008132	SOX13
ENSBTAG00000009643	ZBTB25
ENSBTAG00000009780	GTF2I
ENSBTAG00000013801	PBX1
ENSBTAG00000015015	HINFP
ENSBTAG00000016667	ZBTB46
ENSBTAG00000017405	RORC
ENSBTAG00000019293	EGR3
ENSBTAG00000021645	MBD4
ENSBTAG00000031806	ZNF48
ENSBTAG00000033315	DNAJC1
ENSBTAG00000040551	ZBTB1
ENSBTAG00000044192	MAF
ENSBTAG00000052632	TGIF2

## Sheet: grey60
Supplementary Table 12: Complete List of transcription factors for highly, semi, and non-preserved modules
Gene_id	Symbol
ENSBTAG00000002020	CREBRF
ENSBTAG00000005524	HBP1
ENSBTAG00000005564	PIAS1
ENSBTAG00000006511	MTF1
ENSBTAG00000007356	ELF1
ENSBTAG00000013142	MYNN
ENSBTAG00000013949	AHCTF1
ENSBTAG00000015138	MGA
ENSBTAG00000019020	TAX1BP1
ENSBTAG00000019695	RLF
ENSBTAG00000020745	HIVEP3
ENSBTAG00000021523	STAT3
ENSBTAG00000023847	IKZF5
ENSBTAG00000023929	FOSL2
ENSBTAG00000025129	MNT

## Sheet: lightgreen
Supplementary Table 12: Complete List of transcription factors for highly, semi, and non-preserved modules
Gene_id	Symbol
ENSBTAG00000004139	BACH1
ENSBTAG00000005354	LRRFIP1
ENSBTAG00000007592	RARG
ENSBTAG00000014153	PKNOX1
ENSBTAG00000019255	NFE2L2

## Sheet: magenta
Supplementary Table 12: Complete List of transcription factors for highly, semi, and non-preserved modules
Gene_id	Symbol
ENSBTAG00000000040	MAFG
ENSBTAG00000000222	ARID4B
ENSBTAG00000000819	RFX3
ENSBTAG00000001002	TCF7
ENSBTAG00000001146	HIVEP2
ENSBTAG00000001509	ELK3
ENSBTAG00000002295	ATF2
ENSBTAG00000002341	ETS1
ENSBTAG00000003021	SP1
ENSBTAG00000003339	ZBTB10
ENSBTAG00000003546	TFAM
ENSBTAG00000003687	FOXK2
ENSBTAG00000003902	ZNF512
ENSBTAG00000004368	NFATC3
ENSBTAG00000004650	ZNF516
ENSBTAG00000004742	RUNX1
ENSBTAG00000004862	TUB
ENSBTAG00000004954	TOX
ENSBTAG00000005443	MIER1
ENSBTAG00000005474	CREB1
ENSBTAG00000005863	ATF7
ENSBTAG00000006618	HLF
ENSBTAG00000006678	GATAD2B
ENSBTAG00000007159	ESR1
ENSBTAG00000007761	ZBTB5
ENSBTAG00000008063	PPARA
ENSBTAG00000009210	ZBTB44
ENSBTAG00000009482	AFF4
ENSBTAG00000010255	ZNF24
ENSBTAG00000011001	ERG
ENSBTAG00000011003	IKZF3
ENSBTAG00000011087	ARID2
ENSBTAG00000011234	FOXO3
ENSBTAG00000013460	ZBTB11
ENSBTAG00000014211	FOXP4
ENSBTAG00000014790	ZBTB2
ENSBTAG00000015808	ZNF609
ENSBTAG00000015887	FOXJ3
ENSBTAG00000016077	ZNF317
ENSBTAG00000016757	ZKSCAN1
ENSBTAG00000017682	TET2
ENSBTAG00000018019	BCL11B
ENSBTAG00000018024	NR1D2
ENSBTAG00000018229	NFIX
ENSBTAG00000019742	FOXJ2
ENSBTAG00000021037	ARNT
ENSBTAG00000021237	DST
ENSBTAG00000021996	GATAD1
ENSBTAG00000023675	ZNF654
ENSBTAG00000025434	ZFP36L1
ENSBTAG00000030556	ZNF217
ENSBTAG00000037804	IKZF2
ENSBTAG00000044044	CLOCK
ENSBTAG00000044105	FOXO1
ENSBTAG00000045744	NKRF
ENSBTAG00000046684	FOXN3
ENSBTAG00000049495	ZNF449
ENSBTAG00000052417	THAP2
ENSBTAG00000052945	PURB

## Sheet: midnightblue
Supplementary Table 12: Complete List of transcription factors for highly, semi, and non-preserved modules
Gene_id	Symbol
ENSBTAG00000002291	ZBTB41
ENSBTAG00000003953	ZNF316
ENSBTAG00000005029	TAL1
ENSBTAG00000005852	KLF8
ENSBTAG00000006893	BBX
ENSBTAG00000008048	GCFC2
ENSBTAG00000010819	HMBOX1
ENSBTAG00000012463	ZMAT3
ENSBTAG00000012938	JARID2
ENSBTAG00000014429	KMT2D
ENSBTAG00000015386	REL
ENSBTAG00000015904	RORA
ENSBTAG00000017306	AKNA
ENSBTAG00000017694	TRPS1
ENSBTAG00000018270	NFATC2
ENSBTAG00000018488	AFF1
ENSBTAG00000019001	PRDM10
ENSBTAG00000019310	FOXK1
ENSBTAG00000020552	PRDM2
ENSBTAG00000021000	USF3
ENSBTAG00000024199	KMT2C
ENSBTAG00000024534	POU2F1
ENSBTAG00000044007	KLF12
ENSBTAG00000046612	ZNF292

## Sheet: pink
Supplementary Table 12: Complete List of transcription factors for highly, semi, and non-preserved modules
Gene_id	Symbol
ENSBTAG00000000536	ZNF395
ENSBTAG00000001649	ZFPM2
ENSBTAG00000005150	HMGB3
ENSBTAG00000012441	SMAD7
ENSBTAG00000012629	ZNF362
ENSBTAG00000013444	ETV2
ENSBTAG00000016294	ZNF438
ENSBTAG00000018103	HMGB1
ENSBTAG00000018902	ZC2HC1A
ENSBTAG00000019697	NPAS2
ENSBTAG00000022450	THAP9
ENSBTAG00000034005	ZNF35
ENSBTAG00000038050	ZNF420
ENSBTAG00000039091	CSRNP3
ENSBTAG00000039916	SMAD2
ENSBTAG00000040072	ZNF140
ENSBTAG00000046837	ZNF358
ENSBTAG00000047739	TSC22D1

## Sheet: yellowgreen
Supplementary Table 12: Complete List of transcription factors for highly, semi, and non-preserved modules
Gene_id	Symbol
ENSBTAG00000018088	SETBP1

## Sheet: black
Supplementary Table 12: Complete List of transcription factors for highly, semi, and non-preserved modules
Gene_id	Symbol
ENSBTAG00000001818	MEF2B
ENSBTAG00000003184	GATA1
ENSBTAG00000004073	MTA3
ENSBTAG00000007190	THAP6
ENSBTAG00000007660	ZNF414
ENSBTAG00000008448	MEIS1
ENSBTAG00000008556	POU2F2
ENSBTAG00000009072	ZNF572
ENSBTAG00000013353	ZNF274
ENSBTAG00000014199	TBX21
ENSBTAG00000014768	ZNF786
ENSBTAG00000014829	MYRFL
ENSBTAG00000015879	TULP3
ENSBTAG00000016349	TEAD2
ENSBTAG00000016684	ZNF202
ENSBTAG00000018625	ZNF263
ENSBTAG00000019329	LYL1
ENSBTAG00000019844	ZNF467
ENSBTAG00000021993	SPDEF
ENSBTAG00000023611	ZBTB32
ENSBTAG00000025405	BATF
ENSBTAG00000037508	EBF1

## Sheet: blue
Supplementary Table 12: Complete List of transcription factors for highly, semi, and non-preserved modules
Gene_id	Symbol
ENSBTAG00000000176	SP3
ENSBTAG00000000569	HES1
ENSBTAG00000001333	PPARG
ENSBTAG00000001614	ZNF174
ENSBTAG00000003396	MAFB
ENSBTAG00000003541	ZNF614
ENSBTAG00000003602	RBPJ
ENSBTAG00000005227	ATF6
ENSBTAG00000006805	ZNF180
ENSBTAG00000007714	ZNF235
ENSBTAG00000008649	ETV3
ENSBTAG00000010649	MEF2A
ENSBTAG00000010659	CUX1
ENSBTAG00000011957	CREBL2
ENSBTAG00000011982	BATF3
ENSBTAG00000014228	TFEC
ENSBTAG00000014636	ZFHX3
ENSBTAG00000014786	PBRM1
ENSBTAG00000014915	ETV5
ENSBTAG00000015604	ZNF385A
ENSBTAG00000016000	CARF
ENSBTAG00000016229	KLF9
ENSBTAG00000016580	TEF
ENSBTAG00000016760	LRRFIP2
ENSBTAG00000017661	RFX2
ENSBTAG00000017851	RXRA
ENSBTAG00000019354	PAX8
ENSBTAG00000019555	ZSCAN20
ENSBTAG00000020355	KLF4
ENSBTAG00000020601	ZNF366
ENSBTAG00000020654	BAZ2B
ENSBTAG00000021187	ID2
ENSBTAG00000021329	ZBTB3
ENSBTAG00000026307	ZNF629
ENSBTAG00000037803	ZNF197
ENSBTAG00000040061	ZBTB38
ENSBTAG00000049098	ZNF496

## Sheet: brown
Supplementary Table 12: Complete List of transcription factors for highly, semi, and non-preserved modules
Gene_id	Symbol
ENSBTAG00000000074	NFIA
ENSBTAG00000000816	PRDM1
ENSBTAG00000001005	ZNF280B
ENSBTAG00000002594	ZNF436
ENSBTAG00000002613	MIS18BP1
ENSBTAG00000002835	SMAD1
ENSBTAG00000002929	IRF4
ENSBTAG00000003569	DZIP1
ENSBTAG00000005010	MXD3
ENSBTAG00000005970	XBP1
ENSBTAG00000006212	GTF2IRD1
ENSBTAG00000006404	CENPT
ENSBTAG00000007020	ZNF502
ENSBTAG00000007783	MYBL2
ENSBTAG00000007802	BCLAF1
ENSBTAG00000007986	NSD2
ENSBTAG00000008607	ARID3A
ENSBTAG00000013279	FOXP3
ENSBTAG00000013531	CENPS
ENSBTAG00000014400	E2F2
ENSBTAG00000014554	SNAI1
ENSBTAG00000015802	CREB3L2
ENSBTAG00000015875	FOXM1
ENSBTAG00000016462	TCF4
ENSBTAG00000017446	E2F8
ENSBTAG00000017802	THRB
ENSBTAG00000017824	IRF8
ENSBTAG00000019043	GABPA
ENSBTAG00000019120	WDHD1
ENSBTAG00000019707	GATA2
ENSBTAG00000020701	MEF2C
ENSBTAG00000023938	CENPA
ENSBTAG00000026286	GTF2IRD2
ENSBTAG00000031609	THAP12
ENSBTAG00000031869	ZSCAN26
ENSBTAG00000033174	TFAP4
ENSBTAG00000040206	ZNF770
ENSBTAG00000046010	BHLHA15
ENSBTAG00000055062	SMAD5

[truncated: 26 more sheets: cyan, darkgreen, darkgrey, darkmagenta, darkolivegreen, darkorange, darkturquoise, green, greenyellow, lightcyan, lightyellow, orange, paleturquoise, purple, red, royalblue, saddlebrown, salmon, sienna3, skyblue …]
